# Supplementary material for: CD86 Is Associated with Immune Infiltration and Immunotherapy Signatures in AML and Promotes Its Progression
Source: Hindawi journal article supplement (doi:10.1155/2023/9988405), 2023-04-07
Supplement: f1 [file 9988405.f1.zip]

**Supplementary Table 2: Differences in expression of chemokines, immune stimulators, MHC proteins and immune receptors between CD86 high expression group and low expression group**

|        | logFC     | AveExpr   | t         | P. Value  | adj. P. Val | B         |
|--------|-----------|-----------|-----------|-----------|-------------|-----------|
| CCL1   | -0.462567 | 1.1481064 | -1.653331 | 0.1006921 | 0.2071248   | -5.648527 |
| CCL2   | 0.1080616 | 0.569383  | 0.8224799 | 0.4123196 | 0.5683743   | -6.663081 |
| CCL3   | 0.8892518 | 2.613315  | 4.483828  | 1.60E-05  | 0.0001599   | 2.3323578 |
| CCL4   | -0.048188 | 2.5345371 | -0.270802 | 0.7869755 | 0.8693542   | -6.963631 |
| CCL5   | 0.3347618 | 5.8737699 | 1.5872378 | 0.1149039 | 0.2283994   | -5.753417 |
| CCL7   | 0.0265143 | 0.0657784 | 0.5958763 | 0.5523006 | 0.6901541   | -6.823065 |
| CCL8   | 0.0060869 | 0.2202482 | 0.0749199 | 0.9403943 | 0.9645833   | -6.997466 |
| CCL11  | 0.0072089 | 0.0162463 | 0.8209828 | 0.4131688 | 0.5690417   | -6.664304 |
| CCL13  | -0.042796 | 0.2832065 | -0.537659 | 0.5917379 | 0.7233178   | -6.855962 |
| CCL14  | -0.126571 | 0.3836673 | -1.443669 | 0.1512533 | 0.27971     | -5.967049 |
| CCL15  | -0.030807 | 0.0758897 | -1.732878 | 0.0855042 | 0.1829479   | -5.516858 |
| CCL16  | -0.035597 | 0.1623506 | -1.292326 | 0.1985514 | 0.3403719   | -6.171    |
| CCL17  | -0.031916 | 0.2360376 | -0.681163 | 0.4969875 | 0.6440214   | -6.768806 |
| CCL18  | -0.098187 | 0.7177704 | -0.537288 | 0.5919932 | 0.7235389   | -6.856161 |
| CCL19  | -0.102716 | 0.2201384 | -1.443978 | 0.1511665 | 0.2796559   | -5.96661  |
| CCL20  | -0.000402 | 0.2312239 | -0.005405 | 0.9956957 | 0.9975024   | -7.000256 |
| CCL21  | -0.047775 | 0.2633422 | -0.680912 | 0.4971459 | 0.6440214   | -6.768976 |
| CCL22  | 0.3066726 | 0.325295  | 4.6152296 | 9.35E-06  | 0.0001018   | 2.846681  |
| CCL23  | 1.1965472 | 2.7304292 | 3.5473641 | 0.000543  | 0.0030628   | -1.001459 |
| CCL24  | 0.3565349 | 1.1206307 | 1.6784617 | 0.0956749 | 0.1991479   | -5.607569 |
| CCL25  | 0.1567266 | 0.724642  | 1.123387  | 0.2633569 | 0.4151417   | -6.372652 |
| CCL26  | -0.001159 | 0.1722887 | -0.02864  | 0.9771961 | 0.9863833   | -6.999861 |
| CCL27  | 0.0222895 | 0.0448076 | 1.2584392 | 0.210503  | 0.3550345   | -6.213657 |
| CCL28  | 0.1004546 | 2.5010798 | 0.4933719 | 0.6225877 | 0.74792     | -6.878735 |
| CX3CL1 | -0.038709 | 0.0989784 | -1.430341 | 0.155034  | 0.2847802   | -5.985889 |
| CXCL1  | 0.4170342 | 1.7234051 | 1.7800218 | 0.0774237 | 0.1694978   | -5.436037 |
| CXCL2  | -0.23333  | 3.8771162 | -0.863933 | 0.3892261 | 0.5456624   | -6.628337 |
| CXCL3  | -0.085496 | 2.15947   | -0.375439 | 0.7079495 | 0.8125448   | -6.929865 |
| CXCL5  | -0.012032 | 0.396596  | -0.104301 | 0.9170924 | 0.9512132   | -6.994834 |
| CXCL6  | -0.089238 | 0.2956513 | -1.369741 | 0.1731443 | 0.3084108   | -6.069413 |
| CXCL8  | 0.4854155 | 4.8988748 | 1.4694085 | 0.1441536 | 0.2700191   | -5.930186 |
| CXCL9  | 0.14753   | 0.6178084 | 0.81861   | 0.4145167 | 0.570227    | -6.666239 |
| CXCL10 | 0.8639656 | 1.2405271 | 4.2728545 | 3.72E-05  | 0.0003239   | 1.5294177 |
| CXCL11 | 0.1745495 | 0.2638565 | 2.1953481 | 0.0299252 | 0.0805118   | -4.635826 |
| CXCL12 | -0.298925 | 3.4022286 | -0.67177  | 0.50293   | 0.6491868   | -6.775135 |
| CXCL13 | -0.025339 | 0.3784491 | -0.339269 | 0.7349581 | 0.8324961   | -6.942772 |
| CXCL14 | 0.210799  | 0.5921051 | 1.4667924 | 0.1448631 | 0.2708529   | -5.933961 |
| CXCL16 | 2.2016654 | 2.8792448 | 10.449706 | 6.71E-19  | 1.18E-16    | 32.428706 |
| CXCL17 | -0.34978  | 1.7260152 | -2.852663 | 0.0050505 | 0.0191546   | -3.057305 |
| XCL1   | -0.04079  | 0.7389787 | -0.365421 | 0.7153946 | 0.8183869   | -6.93357  |
| XCL2   | -0.074123 | 1.585167  | -0.440231 | 0.6605059 | 0.7769248   | -6.903488 |
| CCR1   | 2.8949414 | 4.3754328 | 12.729886 | 1.47E-24  | 7.55E-22    | 45.247781 |
| CCR2   | 3.1918027 | 3.9896663 | 12.050278 | 7.07E-23  | 2.55E-20    | 41.439391 |
| CCR3   | 0.3372474 | 0.7144292 | 2.9485177 | 0.0037909 | 0.0152012   | -2.796536 |
| CCR4   | 0.0179573 | 1.5909334 | 0.1089279 | 0.9134287 | 0.9489282   | -6.994341 |
| CCR5   | 2.0661275 | 2.615431  | 10.470434 | 5.96E-19  | 1.06E-16    | 32.545228 |

|          |           |           |           |           |           |           |
|----------|-----------|-----------|-----------|-----------|-----------|-----------|
| CCR6     | 0.0327559 | 0.3757899 | 0.5993014 | 0.5500217 | 0.6884562 | -6.821025 |
| CCR7     | 0.142433  | 3.6394909 | 0.6283335 | 0.530895  | 0.6722377 | -6.803265 |
| CCR8     | -0.10575  | 0.5826647 | -1.239501 | 0.2174075 | 0.3628119 | -6.237015 |
| CCR9     | 0.0141856 | 1.2921943 | 0.1188077 | 0.9056123 | 0.9440188 | -6.993217 |
| CCR10    | 0.0960317 | 0.8841812 | 1.0940037 | 0.2759894 | 0.4291796 | -6.404904 |
| CXCR1    | 0.4310979 | 1.2165166 | 2.4047855 | 0.0176004 | 0.0528311 | -4.173466 |
| CXCR2    | 1.131885  | 2.6118279 | 5.5854781 | 1.32E-07  | 2.48E-06  | 6.9521578 |
| CXCR3    | -0.064158 | 2.2793732 | -0.33399  | 0.7389287 | 0.8353129 | -6.944546 |
| CXCR4    | 0.8130352 | 8.1650359 | 4.4051717 | 2.20E-05  | 0.0002081 | 2.0296636 |
| CXCR5    | -0.038215 | 0.3715621 | -0.642922 | 0.5214142 | 0.6648067 | -6.794025 |
| CXCR6    | -0.065934 | 2.1240486 | -0.54143  | 0.5891437 | 0.721159  | -6.853933 |
| XCR1     | 0.0799702 | 0.3134821 | 0.992747  | 0.3226894 | 0.479171  | -6.509612 |
| CX3CR1   | 2.9149394 | 4.9457563 | 9.8724082 | 1.80E-17  | 2.37E-15  | 29.191766 |
| B2M      | 0.4206834 | 10.588844 | 4.4502953 | 1.83E-05  | 0.0001783 | 2.202834  |
| HLA-A    | 0.2668634 | 9.1002307 | 1.9550087 | 0.0527417 | 0.1258093 | -5.118074 |
| HLA-B    | 0.6468637 | 9.869248  | 4.6507528 | 8.07E-06  | 8.99E-05  | 2.9875499 |
| HLA-C    | 0.4921117 | 9.1037541 | 3.8076694 | 0.0002158 | 0.0014107 | -0.136147 |
| HLA-DMA  | 1.1735018 | 6.9038045 | 5.159937  | 9.07E-07  | 1.35E-05  | 5.0881498 |
| HLA-DMB  | 1.8181002 | 4.7936246 | 7.4299209 | 1.32E-11  | 6.05E-10  | 15.932876 |
| HLA-DOA  | 0.7374904 | 3.8670778 | 2.4415485 | 0.0159783 | 0.0488206 | -4.088328 |
| HLA-DOB  | 0.4161891 | 3.0448099 | 2.5969572 | 0.010496  | 0.0346365 | -3.71549  |
| HLA-DPA1 | 1.6228543 | 6.4088635 | 5.2243175 | 6.81E-07  | 1.04E-05  | 5.3641012 |
| HLA-DPB1 | 1.4556864 | 7.0307646 | 5.0314375 | 1.60E-06  | 2.20E-05  | 4.5441154 |
| HLA-DQA1 | 1.4711116 | 4.2468382 | 4.9893114 | 1.92E-06  | 2.57E-05  | 4.3677574 |
| HLA-DQA2 | 0.8514862 | 3.2067699 | 2.1978591 | 0.0297414 | 0.0801201 | -4.630513 |
| HLA-DQB1 | 1.8713123 | 5.3110256 | 5.9080954 | 2.89E-08  | 6.38E-07  | 8.4247154 |
| HLA-DRA  | 1.7951665 | 10.15013  | 6.2203556 | 6.38E-09  | 1.63E-07  | 9.8944187 |
| HLA-DRB1 | 1.8404215 | 8.3925353 | 6.5690255 | 1.13E-09  | 3.42E-08  | 11.582554 |
| HLA-E    | 0.5592047 | 9.1048175 | 4.304974  | 3.27E-05  | 0.0002918 | 1.6498061 |
| HLA-F    | 0.7838752 | 4.4640923 | 4.0686323 | 8.18E-05  | 0.000627  | 0.7799735 |
| HLA-G    | 0.4011164 | 2.4843648 | 2.6670089 | 0.0086323 | 0.0295128 | -3.54066  |
| TAP1     | 0.3087528 | 5.3907941 | 2.3551162 | 0.0200232 | 0.0585337 | -4.286617 |
| TAP2     | 0.2794076 | 4.5975606 | 2.3406188 | 0.0207838 | 0.0603029 | -4.319235 |
| TAPBP    | 0.1815401 | 7.55017   | 2.6180163 | 0.0099008 | 0.0330085 | -3.663371 |
| BTNL2    | -0.016188 | 0.2761892 | -0.302763 | 0.7625572 | 0.8519067 | -6.954476 |
| VSIR     | 1.7867308 | 7.0377514 | 8.9819863 | 2.74E-15  | 2.64E-13  | 24.25121  |
| CD27     | 0.1032421 | 3.435623  | 0.6396986 | 0.5235016 | 0.6666672 | -6.796085 |
| CD276    | 0.3098782 | 1.3974076 | 1.4135531 | 0.1598987 | 0.2912315 | -6.009378 |
| CD28     | -0.004849 | 2.1374245 | -0.025716 | 0.9795234 | 0.9878239 | -6.99994  |
| CD40     | 0.3881258 | 2.5208415 | 1.976877  | 0.0501856 | 0.1210325 | -5.076361 |
| CD40LG   | -0.156378 | 2.2987725 | -0.878143 | 0.3814969 | 0.5383171 | -6.616038 |
| CD48     | 1.0910446 | 5.1777971 | 4.6852871 | 6.99E-06  | 7.93E-05  | 3.1252322 |
| CD70     | 0.1015928 | 1.5425073 | 0.3884847 | 0.698297  | 0.8061256 | -6.92489  |
| CD80     | -0.102394 | 0.9839942 | -0.853134 | 0.3951642 | 0.551556  | -6.637551 |
| CD86     | 3.1820475 | 3.8908726 | 16.484874 | 1.45E-33  | 2.81E-29  | 65.609523 |
| ENTPD1   | 0.4822608 | 4.2967044 | 3.77323   | 0.0002445 | 0.001567  | -0.25346  |
| HHLA2    | 0.73891   | 0.9628246 | 5.3540035 | 3.81E-07  | 6.25E-06  | 5.9266476 |
| ICOS     | 0.0639916 | 1.5924252 | 0.3986607 | 0.6908015 | 0.8008935 | -6.920892 |
| ICOSLG   | -0.057115 | 0.5687271 | -0.607817 | 0.5443758 | 0.683665  | -6.815902 |
| IL2RA    | 0.3000976 | 2.3749164 | 0.9666603 | 0.3355204 | 0.4922518 | -6.534967 |
| IL6      | 0.1076263 | 0.2517914 | 1.8304567 | 0.069487  | 0.1562714 | -5.34729  |

|           |           |           |           |           |           |           |
|-----------|-----------|-----------|-----------|-----------|-----------|-----------|
| IL6R      | 0.8730454 | 6.1449863 | 6.436     | 2.20E-09  | 6.23E-08  | 10.932933 |
| KLRC1     | -0.03064  | 0.6626205 | -0.277583 | 0.7817761 | 0.8653756 | -6.961774 |
| KLRK1     | -0.075618 | 1.024701  | -0.636499 | 0.5255777 | 0.6682615 | -6.798119 |
| LTA       | 0.1336307 | 1.1410355 | 1.0785295 | 0.2828076 | 0.4368096 | -6.421552 |
| MICB      | 0.4651475 | 4.7169043 | 5.6731259 | 8.77E-08  | 1.73E-06  | 7.3473721 |
| NT5E      | 0.2859555 | 1.837652  | 1.2162812 | 0.2260959 | 0.3725194 | -6.265182 |
| PVR       | -0.54375  | 3.9830109 | -2.363333 | 0.0196031 | 0.0575205 | -4.268047 |
| RAET1E    | -0.060613 | 0.4970636 | -0.658082 | 0.5116566 | 0.6563937 | -6.784201 |
| TMEM173   | 0.2709699 | 7.3467821 | 2.1702444 | 0.0318176 | 0.0844708 | -4.688632 |
| TMIGD2    | -1.090223 | 3.5393041 | -3.307245 | 0.0012205 | 0.0059359 | -1.754836 |
| TNFRSF13B | 0.1469521 | 0.8255735 | 1.4106044 | 0.1607652 | 0.2924369 | -6.013476 |
| TNFRSF13C | 0.0896496 | 2.9972156 | 0.5932478 | 0.5540527 | 0.6915442 | -6.824622 |
| TNFRSF14  | 0.418859  | 4.9473379 | 2.2592841 | 0.0255413 | 0.0711268 | -4.498795 |
| TNFRSF17  | -0.031134 | 2.5679468 | -0.170401 | 0.8649615 | 0.9194459 | -6.985761 |
| TNFRSF18  | -0.851536 | 1.7879866 | -3.262457 | 0.0014132 | 0.0066992 | -1.890459 |
| TNFRSF25  | -0.682691 | 3.3376142 | -3.270195 | 0.001378  | 0.0065548 | -1.867141 |
| TNFRSF4   | -0.836884 | 2.2250361 | -2.926764 | 0.0040484 | 0.0160418 | -2.856379 |
| TNFRSF8   | 1.2369701 | 1.5169365 | 8.1975253 | 2.11E-13  | 1.34E-11  | 19.986243 |
| TNFRSF9   | 0.2600499 | 0.7123209 | 3.0925374 | 0.0024323 | 0.0105511 | -2.390658 |
| TNFSF13   | 1.1758544 | 4.1076171 | 8.6855458 | 1.43E-14  | 1.17E-12  | 22.627623 |
| TNFSF13B  | 1.0393953 | 6.4554854 | 6.5843516 | 1.04E-09  | 3.19E-08  | 11.657822 |
| TNFSF14   | 0.4250124 | 2.1575881 | 2.4702958 | 0.014804  | 0.0459321 | -4.020934 |
| TNFSF15   | 0.6825729 | 0.509486  | 11.161494 | 1.14E-20  | 2.81E-18  | 36.436104 |
| TNFSF18   | 0.0687802 | 0.1783799 | 1.6602265 | 0.0992948 | 0.2048639 | -5.637348 |
| TNFSF4    | -0.143532 | 3.6603202 | -0.700098 | 0.4851254 | 0.6339396 | -6.755784 |
| TNFSF9    | 0.7827279 | 2.2943841 | 3.6391601 | 0.0003942 | 0.0023475 | -0.701975 |
| ULBP1     | 0.034404  | 0.2495607 | 0.6867393 | 0.4934781 | 0.6414886 | -6.765008 |
