# Supplementary material for: CD86 Is Associated with Immune Infiltration and Immunotherapy Signatures in AML and Promotes Its Progression
Source: Hindawi journal article supplement (doi:10.1155/2023/9988405), 2023-04-07
Supplement: f1 [file 9988405.f1.zip]

Supplementary Table 3: Differences between CD86 high-low expression group and CD8+ T cell recruitment, macrophage, NK cell, and Th1

|         | logFC     | AveExpr   | t         | P. Value  | adj. P. Val | B         |
|---------|-----------|-----------|-----------|-----------|-------------|-----------|
| PRF1    | -0.317407 | 4.4241961 | -1.35834  | 0.1767237 | 0.3126403   | -6.084735 |
| GZMB    | 0.3267575 | 2.8684711 | 1.2922731 | 0.1985698 | 0.3403719   | -6.171068 |
| CXCL10  | 0.8639656 | 1.2405271 | 4.2728545 | 3.72E-05  | 0.0003239   | 1.5294177 |
| GZMA    | 0.0939196 | 3.8879433 | 0.4200374 | 0.675156  | 0.7890539   | -6.912157 |
| CCL5    | 0.3347618 | 5.8737699 | 1.5872378 | 0.1149039 | 0.2283994   | -5.753417 |
| CD8A    | 0.0033851 | 2.9310479 | 0.0166581 | 0.9867351 | 0.9924607   | -7.000132 |
| IFNG    | -0.006866 | 1.1570379 | -0.045391 | 0.9638657 | 0.9792131   | -6.999241 |
| TBX21   | -0.087613 | 2.1673691 | -0.45898  | 0.6470202 | 0.7667628   | -6.895075 |
| CXCR3   | -0.064158 | 2.2793732 | -0.33399  | 0.7389287 | 0.8353129   | -6.944546 |
| CD8B    | -0.013057 | 2.0540622 | -0.074622 | 0.9406306 | 0.9645837   | -6.997488 |
| GZMM    | -0.143331 | 2.5900803 | -0.815418 | 0.4163342 | 0.5719232   | -6.668832 |
| FLT3LG  | 0.1194119 | 1.9298247 | 1.1661922 | 0.2456856 | 0.3958162   | -6.324168 |
| SIGLEC1 | 2.1803998 | 1.8598039 | 8.254204  | 1.54E-13  | 1.02E-11    | 20.290751 |
| SLAMF8  | 0.0495674 | 1.099478  | 0.3895149 | 0.6975368 | 0.805726    | -6.92449  |
| SLC15A3 | 2.7201401 | 2.5655756 | 15.549806 | 2.22E-31  | 1.08E-27    | 60.676681 |
| LILRB4  | 3.3745861 | 2.7990174 | 13.621738 | 9.53E-27  | 7.42E-24    | 50.203425 |
| FGL2    | 3.3057428 | 5.3996481 | 14.042572 | 9.02E-28  | 8.78E-25    | 52.520264 |
| IL21R   | 0.4592228 | 1.6303061 | 3.2646737 | 0.001403  | 0.0066543   | -1.883784 |
| CLEC5A  | 0.6773409 | 3.5851859 | 1.8234176 | 0.0705524 | 0.1580813   | -5.359818 |
| C1QA    | 1.9572286 | 3.165396  | 5.3284741 | 4.27E-07  | 6.90E-06    | 5.8152113 |
| CSF1R   | 1.8133661 | 6.3393394 | 8.3043888 | 1.17E-13  | 8.02E-12    | 20.560896 |
| CYBB    | 3.0996452 | 6.7547591 | 10.518005 | 4.54E-19  | 8.33E-17    | 32.812709 |
| MS4A6A  | 3.6332928 | 4.8210416 | 13.06732  | 2.17E-25  | 1.41E-22    | 47.1293   |
| MARCO   | 2.493451  | 1.8232444 | 10.239743 | 2.22E-18  | 3.55E-16    | 31.249387 |
| LILRA2  | 1.785648  | 4.773508  | 8.8251014 | 6.58E-15  | 5.82E-13    | 23.39035  |
| MMP8    | 0.4825895 | 2.1774615 | 1.2191882 | 0.2249946 | 0.3714597   | -6.261684 |
| C1QB    | 0.9369498 | 2.7609898 | 2.4195981 | 0.01693   | 0.0511979   | -4.139304 |
| SPON2   | -0.288398 | 3.5991016 | -1.686416 | 0.0941296 | 0.1965857   | -5.594481 |
| IL7R    | -0.036262 | 4.197528  | -0.157701 | 0.8749388 | 0.9255441   | -6.987843 |
| PRR5L   | -0.197802 | 3.5523947 | -0.830036 | 0.4080499 | 0.5640868   | -6.656874 |
| NCR1    | 0.0525845 | 1.5478045 | 0.2922177 | 0.7705891 | 0.8576792   | -6.957609 |
| CRTAM   | 0.6293126 | 1.5968009 | 4.887975  | 2.97E-06  | 3.75E-05    | 3.947635  |
| CCL4    | -0.048188 | 2.5345371 | -0.270802 | 0.7869755 | 0.8693542   | -6.963631 |
| CTLA4   | 0.3180816 | 1.387833  | 2.0848426 | 0.039053  | 0.0992864   | -4.864042 |
| SLAMF1  | 0.5814518 | 1.9687097 | 3.8168069 | 0.0002088 | 0.0013724   | -0.10488  |
