# Supplementary material for: CD86 Is Associated with Immune Infiltration and Immunotherapy Signatures in AML and Promotes Its Progression
Source: Hindawi journal article supplement (doi:10.1155/2023/9988405), 2023-04-07
Supplement: f1 [file 9988405.f1.zip]

Supplementary Table 4: Differential genes in StromalScore, ImmuneScore and CD86 high-low expression groups

|           | CD86_limma_res |             |             |          |             |             |
|-----------|----------------|-------------|-------------|----------|-------------|-------------|
|           | logFC          | AveExpr     | t           | P. Value | adj. P. Val | B           |
| CD86      | 3.18204747     | 3.890872624 | 16.48487438 | 1.45E-33 | 2.81E-29    | 65.60952262 |
| ARHGEF10L | 2.86437811     | 2.02562405  | 15.78819445 | 6.09E-32 | 5.93E-28    | 61.94410625 |
| CLEC4A    | 2.737294976    | 3.669721727 | 15.68289461 | 1.08E-31 | 6.99E-28    | 61.38507548 |
| SLC15A3   | 2.720140055    | 2.565575558 | 15.54980626 | 2.22E-31 | 1.08E-27    | 60.67668072 |
| TLR8      | 3.795621285    | 3.367211846 | 15.20520009 | 1.45E-30 | 5.66E-27    | 58.83308663 |
| TLR7      | 2.896875107    | 2.431583542 | 15.16411674 | 1.82E-30 | 5.91E-27    | 58.61241378 |
| TLR5      | 2.644017815    | 2.382632377 | 14.87980143 | 8.68E-30 | 2.41E-26    | 57.0802405  |
| FGD2      | 2.875012095    | 3.63376478  | 14.78492376 | 1.46E-29 | 3.56E-26    | 56.56702998 |
| SAMHD1    | 2.905147697    | 7.041226851 | 14.70547878 | 2.27E-29 | 4.91E-26    | 56.13657602 |
| SLC7A7    | 2.891797863    | 3.926749247 | 14.53247862 | 5.91E-29 | 1.05E-25    | 55.19697965 |
| TLDC2     | 2.320448799    | 3.688747872 | 14.53149033 | 5.94E-29 | 1.05E-25    | 55.19160336 |
| MPEG1     | 4.409773366    | 6.077885154 | 14.41231293 | 1.15E-28 | 1.87E-25    | 54.54256968 |
| IGSF6     | 2.157071988    | 4.615148262 | 14.3568826  | 1.57E-28 | 2.19E-25    | 54.24022307 |
| MEFV      | 3.252748053    | 3.011967381 | 14.3562065  | 1.57E-28 | 2.19E-25    | 54.23653343 |
| ADAP2     | 2.617989984    | 3.31793606  | 14.34190697 | 1.70E-28 | 2.21E-25    | 54.15848673 |
| SIGLEC9   | 3.160120269    | 3.413608415 | 14.32560219 | 1.86E-28 | 2.27E-25    | 54.0694713  |
| RBM47     | 3.080798987    | 3.442842442 | 14.28536963 | 2.33E-28 | 2.67E-25    | 53.84971335 |
| CTSS      | 2.349811896    | 7.500201545 | 14.16265085 | 4.62E-28 | 4.82E-25    | 53.17844814 |
| MYCL      | 2.158820983    | 1.484927119 | 14.1592925  | 4.70E-28 | 4.82E-25    | 53.1600582  |
| FGL2      | 3.305742798    | 5.399648057 | 14.04257238 | 9.02E-28 | 8.78E-25    | 52.52026358 |
| KCTD12    | 3.524758931    | 4.685683084 | 14.02117848 | 1.02E-27 | 9.42E-25    | 52.40285874 |
| SCIMP     | 2.730707382    | 3.739953669 | 13.77232177 | 4.09E-27 | 3.62E-24    | 51.03419459 |
| CD101     | 2.442834885    | 2.635624261 | 13.69539975 | 6.30E-27 | 5.33E-24    | 50.61005284 |
| CD1D      | 3.261614647    | 3.613320376 | 13.65828582 | 7.76E-27 | 6.30E-24    | 50.4052319  |
| LILRB4    | 3.374586079    | 2.799017395 | 13.62173818 | 9.53E-27 | 7.42E-24    | 50.20342459 |
| SIRPD     | 2.131570481    | 1.716863208 | 13.57482399 | 1.24E-26 | 9.29E-24    | 49.94421524 |
| CTSZ      | 1.659276257    | 7.337766283 | 13.44698971 | 2.55E-26 | 1.84E-23    | 49.23701083 |
| MS4A4A    | 2.998781623    | 3.116552624 | 13.26855003 | 6.97E-26 | 4.85E-23    | 48.24773004 |
| CD300E    | 4.189415111    | 3.451381237 | 13.10277877 | 1.78E-25 | 1.19E-22    | 47.32658539 |
| MS4A6A    | 3.633292819    | 4.821041588 | 13.06731991 | 2.17E-25 | 1.41E-22    | 47.12929971 |
| POU2F2    | 2.063834388    | 5.268235315 | 12.96027341 | 3.99E-25 | 2.50E-22    | 46.53320082 |
| CD14      | 4.258982927    | 4.724960659 | 12.92717434 | 4.81E-25 | 2.93E-22    | 46.34873269 |
| CD300LB   | 2.872851603    | 3.30360258  | 12.8469797  | 7.58E-25 | 4.47E-22    | 45.90150122 |
| IL1RN     | 2.696880085    | 3.106985169 | 12.83216101 | 8.24E-25 | 4.72E-22    | 45.81881591 |
| NCF2      | 2.726345234    | 6.16819615  | 12.80427369 | 9.66E-25 | 5.37E-22    | 45.66317383 |
| LRP1      | 3.384845137    | 4.014806711 | 12.76822462 | 1.19E-24 | 6.41E-22    | 45.46191028 |
| SLC37A2   | 2.203712036    | 2.676983118 | 12.75903972 | 1.25E-24 | 6.57E-22    | 45.41061815 |
| CCR1      | 2.894941413    | 4.37543277  | 12.7298863  | 1.47E-24 | 7.55E-22    | 45.24778088 |
| CLEC7A    | 3.32407002     | 3.767697805 | 12.69220804 | 1.83E-24 | 9.11E-22    | 45.03725431 |
| RNASE6    | 3.063764383    | 5.996590633 | 12.6468988  | 2.36E-24 | 1.15E-21    | 44.78398223 |
| SIGLEC7   | 2.366681194    | 2.466187909 | 12.62687485 | 2.65E-24 | 1.26E-21    | 44.67201456 |
| GPBAR1    | 2.170595198    | 2.655034188 | 12.5264299  | 4.68E-24 | 2.14E-21    | 44.11002829 |

|            |              |              |              |           |           |              |
|------------|--------------|--------------|--------------|-----------|-----------|--------------|
| LRRC25     | 3. 023780491 | 4. 601091751 | 12. 52493632 | 4. 72E-24 | 2. 14E-21 | 44. 10166771 |
| AL049634.2 | 1. 088301955 | 0. 759371869 | 12. 49458426 | 5. 62E-24 | 2. 48E-21 | 43. 93174164 |
| CD300C     | 2. 66129357  | 4. 224754744 | 12. 43973757 | 7. 67E-24 | 3. 32E-21 | 43. 62456367 |
| NLRP12     | 2. 805142429 | 3. 048773692 | 12. 33705864 | 1. 38E-23 | 5. 83E-21 | 43. 049099   |
| LILRA1     | 2. 775736369 | 4. 152441497 | 12. 30400512 | 1. 66E-23 | 6. 89E-21 | 42. 86374569 |
| TNFRSF1B   | 2. 680085284 | 6. 132103482 | 12. 24360077 | 2. 35E-23 | 9. 52E-21 | 42. 52489256 |
| CHST15     | 2. 772243675 | 3. 220297497 | 12. 23079149 | 2. 52E-23 | 1. 00E-20 | 42. 45301547 |
| IFI30      | 2. 263451423 | 2. 217785321 | 12. 20488898 | 2. 93E-23 | 1. 14E-20 | 42. 30764695 |
| IL13RA1    | 2. 38893334  | 4. 875219807 | 12. 14601976 | 4. 10E-23 | 1. 56E-20 | 41. 97716243 |
| NCF1       | 2. 765975341 | 3. 496803105 | 12. 13605807 | 4. 34E-23 | 1. 62E-20 | 41. 92122505 |
| 1-Mar      | 1. 772162103 | 3. 907991349 | 12. 09440528 | 5. 50E-23 | 2. 02E-20 | 41. 68729311 |
| CCR2       | 3. 191802728 | 3. 989666273 | 12. 05027767 | 7. 07E-23 | 2. 55E-20 | 41. 43939129 |
| LY96       | 2. 239550087 | 3. 912163435 | 11. 96561828 | 1. 15E-22 | 4. 06E-20 | 40. 96359644 |
| STX11      | 2. 250550902 | 5. 098080974 | 11. 93729738 | 1. 35E-22 | 4. 69E-20 | 40. 80437665 |
| SLC11A1    | 3. 068252004 | 3. 668955998 | 11. 88141697 | 1. 86E-22 | 6. 34E-20 | 40. 49014436 |
| CUEDC1     | 1. 673031308 | 2. 087713464 | 11. 8404563  | 2. 35E-22 | 7. 87E-20 | 40. 25975162 |
| C9orf72    | 1. 570326387 | 4. 692087057 | 11. 7723583  | 3. 46E-22 | 1. 14E-19 | 39. 87661679 |
| C19orf38   | 2. 140806967 | 4. 756748242 | 11. 7681724  | 3. 55E-22 | 1. 15E-19 | 39. 85306201 |
| KLF4       | 2. 956170529 | 4. 945466196 | 11. 76529707 | 3. 61E-22 | 1. 15E-19 | 39. 83688182 |
| LILRB1     | 2. 453946658 | 3. 486813013 | 11. 68077828 | 5. 85E-22 | 1. 84E-19 | 39. 36118545 |
| SULF2      | 2. 42228661  | 3. 940552996 | 11. 62440289 | 8. 07E-22 | 2. 49E-19 | 39. 04380175 |
| SIRPB1     | 2. 859975617 | 3. 958171753 | 11. 60577854 | 8. 98E-22 | 2. 73E-19 | 38. 93893619 |
| VCAN       | 4. 213490866 | 5. 315015266 | 11. 56243564 | 1. 15E-21 | 3. 45E-19 | 38. 69486704 |
| LILRB2     | 3. 205617317 | 4. 319628714 | 11. 55458104 | 1. 20E-21 | 3. 55E-19 | 38. 65063343 |
| LGALS2     | 3. 477046661 | 3. 003776548 | 11. 45522049 | 2. 13E-21 | 6. 17E-19 | 38. 09099939 |
| ASGR2      | 2. 486962483 | 2. 342679339 | 11. 44135915 | 2. 30E-21 | 6. 59E-19 | 38. 01291698 |
| MS4A14     | 2. 439589792 | 3. 232899066 | 11. 43203633 | 2. 43E-21 | 6. 85E-19 | 37. 96039938 |
| NLRC4      | 1. 995356388 | 3. 335477271 | 11. 38598798 | 3. 16E-21 | 8. 78E-19 | 37. 70098488 |
| MAFB       | 3. 459582915 | 3. 802632868 | 11. 38147068 | 3. 24E-21 | 8. 89E-19 | 37. 67553545 |
| ADA2       | 2. 060104253 | 6. 704439663 | 11. 36776048 | 3. 51E-21 | 9. 48E-19 | 37. 59829435 |
| SLC43A2    | 1. 99008467  | 3. 388876315 | 11. 36029048 | 3. 66E-21 | 9. 76E-19 | 37. 5562089  |
| FGR        | 2. 993100232 | 6. 247745024 | 11. 30047574 | 5. 16E-21 | 1. 36E-18 | 37. 2192026  |
| HK3        | 3. 468402772 | 4. 349380146 | 11. 29556825 | 5. 30E-21 | 1. 38E-18 | 37. 19155205 |
| COTL1      | 1. 712896894 | 6. 377000959 | 11. 23417463 | 7. 54E-21 | 1. 93E-18 | 36. 84563    |
| NAGA       | 1. 523535043 | 5. 860961359 | 11. 18632617 | 9. 91E-21 | 2. 50E-18 | 36. 57602204 |
| CSF2RA     | 1. 829822799 | 5. 141437202 | 11. 17237164 | 1. 07E-20 | 2. 68E-18 | 36. 49739333 |
| TNFSF15    | 0. 682572868 | 0. 509485973 | 11. 16149432 | 1. 14E-20 | 2. 81E-18 | 36. 43610372 |
| SLC46A2    | 1. 55584724  | 1. 531478475 | 11. 1114717  | 1. 52E-20 | 3. 67E-18 | 36. 15424776 |
| SLC6A12    | 1. 177282346 | 0. 789451266 | 11. 11084813 | 1. 53E-20 | 3. 67E-18 | 36. 15073428 |
| MYOF       | 2. 644892332 | 2. 827258831 | 11. 10390651 | 1. 59E-20 | 3. 77E-18 | 36. 11162182 |
| PILRA      | 1. 893059347 | 5. 048142853 | 11. 07508532 | 1. 87E-20 | 4. 38E-18 | 35. 94923152 |
| LILRA5     | 3. 362182477 | 3. 447420747 | 11. 07367894 | 1. 89E-20 | 4. 38E-18 | 35. 94130751 |
| DTX4       | 1. 897800654 | 2. 660175077 | 11. 06159705 | 2. 02E-20 | 4. 63E-18 | 35. 87323455 |
| LILRA6     | 2. 596859398 | 2. 622608198 | 11. 05015844 | 2. 16E-20 | 4. 89E-18 | 35. 80878686 |
| C5AR1      | 3. 306824661 | 4. 493231657 | 11. 02587177 | 2. 48E-20 | 5. 56E-18 | 35. 67195319 |
| PSAP       | 1. 630442414 | 9. 466183206 | 10. 99516195 | 2. 96E-20 | 6. 55E-18 | 35. 49893745 |
| OSBPL11    | 1. 208181739 | 4. 487273237 | 10. 9384167  | 4. 10E-20 | 8. 96E-18 | 35. 17926474 |

|          |             |             |             |          |          |             |
|----------|-------------|-------------|-------------|----------|----------|-------------|
| FCER1G   | 2.490632121 | 7.540687066 | 10.91131094 | 4.79E-20 | 1.03E-17 | 35.0265783  |
| JAML     | 2.669936064 | 4.187177829 | 10.89940842 | 5.12E-20 | 1.10E-17 | 34.95953459 |
| LILRB3   | 2.360769286 | 3.663464921 | 10.8944301  | 5.27E-20 | 1.11E-17 | 34.93149358 |
| UNC5A    | 1.799457837 | 1.401855363 | 10.88383892 | 5.60E-20 | 1.17E-17 | 34.87183869 |
| SLC8A1   | 1.787751175 | 1.386920272 | 10.82244161 | 7.96E-20 | 1.65E-17 | 34.52605234 |
| VDR      | 1.926848008 | 2.954289216 | 10.72901954 | 1.36E-19 | 2.78E-17 | 34.00003696 |
| MBD2     | 0.75129893  | 5.096147659 | 10.72411506 | 1.40E-19 | 2.83E-17 | 33.97242721 |
| RAB39A   | 1.521008448 | 1.329752205 | 10.67515335 | 1.85E-19 | 3.71E-17 | 33.69682899 |
| S100A9   | 4.288401307 | 9.319288163 | 10.64848165 | 2.15E-19 | 4.27E-17 | 33.54672314 |
| MS4A7    | 2.315517742 | 4.713307771 | 10.6467293  | 2.17E-19 | 4.27E-17 | 33.53686176 |
| NAIP     | 1.724583354 | 2.530954584 | 10.6452569  | 2.19E-19 | 4.27E-17 | 33.52857584 |
| MTMR11   | 2.487589197 | 2.109279975 | 10.61646347 | 2.59E-19 | 4.98E-17 | 33.36655319 |
| LRRK2    | 2.417984586 | 2.52631382  | 10.60184721 | 2.81E-19 | 5.36E-17 | 33.28431549 |
| PLBD1    | 3.427189703 | 3.923940727 | 10.59704442 | 2.89E-19 | 5.46E-17 | 33.25729417 |
| TNFSF10  | 1.847834516 | 4.758249823 | 10.53269778 | 4.17E-19 | 7.81E-17 | 32.89533717 |
| KIAA0513 | 1.902119899 | 3.393287331 | 10.52092612 | 4.46E-19 | 8.27E-17 | 32.82913464 |
| CYBB     | 3.099645166 | 6.754759134 | 10.51800526 | 4.54E-19 | 8.33E-17 | 32.81270877 |
| MEGF9    | 1.7870733   | 5.259485285 | 10.49185201 | 5.27E-19 | 9.59E-17 | 32.66564538 |
| ITGAM    | 2.354192563 | 5.560710542 | 10.47521004 | 5.80E-19 | 1.04E-16 | 32.57207776 |
| CCR5     | 2.066127503 | 2.615431007 | 10.47043415 | 5.96E-19 | 1.06E-16 | 32.54522772 |
| ZNF385A  | 1.76347798  | 5.513079175 | 10.46886754 | 6.01E-19 | 1.06E-16 | 32.53642041 |
| CXCL16   | 2.20166537  | 2.879244845 | 10.44970646 | 6.71E-19 | 1.18E-16 | 32.4287063  |
| S100A4   | 1.700360247 | 8.209092696 | 10.43236221 | 7.41E-19 | 1.29E-16 | 32.33121746 |
| LY86     | 2.934145998 | 5.038448468 | 10.36595849 | 1.08E-18 | 1.86E-16 | 31.95808446 |
| ACPP     | 1.860354621 | 3.363903568 | 10.33958298 | 1.26E-18 | 2.15E-16 | 31.80992729 |
| GABARAP  | 0.877056688 | 5.055255466 | 10.33281553 | 1.31E-18 | 2.21E-16 | 31.77191789 |
| SRGAP2   | 1.224092136 | 3.871591001 | 10.33156665 | 1.32E-18 | 2.21E-16 | 31.76490374 |
| IL10RA   | 2.07572509  | 4.86945179  | 10.31295527 | 1.46E-18 | 2.44E-16 | 31.66038445 |
| GASK1B   | 2.536254016 | 3.242688766 | 10.306868   | 1.52E-18 | 2.49E-16 | 31.62620245 |
| ITGB2    | 1.979044123 | 7.508271431 | 10.30586125 | 1.52E-18 | 2.49E-16 | 31.62054941 |
| SECTM1   | 2.634918742 | 2.843133595 | 10.2917457  | 1.65E-18 | 2.68E-16 | 31.54129324 |
| CD4      | 2.089177026 | 5.787242216 | 10.28330847 | 1.73E-18 | 2.79E-16 | 31.49392422 |
| MARCO    | 2.493450985 | 1.82324443  | 10.23974264 | 2.22E-18 | 3.55E-16 | 31.24938735 |
| HVCN1    | 1.498915241 | 4.424530386 | 10.23687685 | 2.26E-18 | 3.58E-16 | 31.2333048  |
| PTPRO    | 1.636359687 | 1.852962199 | 10.2215214  | 2.47E-18 | 3.87E-16 | 31.14713843 |
| LYZ      | 3.463545538 | 10.98525357 | 10.21517191 | 2.56E-18 | 3.98E-16 | 31.11151212 |
| SIRPA    | 1.425307342 | 5.722664984 | 10.20426461 | 2.72E-18 | 4.20E-16 | 31.05031717 |
| RASSF4   | 2.077273021 | 4.12388081  | 10.1872416  | 3.00E-18 | 4.60E-16 | 30.95482262 |
| ZDHHC7   | 0.869896225 | 5.775033454 | 10.1833671  | 3.07E-18 | 4.66E-16 | 30.93308985 |
| HEXB     | 1.181238864 | 5.337256006 | 10.1707654  | 3.29E-18 | 4.97E-16 | 30.86241014 |
| PTAFR    | 2.370962434 | 4.962578672 | 10.16646218 | 3.38E-18 | 5.05E-16 | 30.83827644 |
| APOA2    | 1.761114338 | 2.219255462 | 10.16399247 | 3.42E-18 | 5.07E-16 | 30.82442601 |
| IRF8     | 2.666330937 | 5.103193362 | 10.16251068 | 3.45E-18 | 5.07E-16 | 30.81611612 |
| P2RY13   | 2.436966793 | 4.020890502 | 10.16186944 | 3.47E-18 | 5.07E-16 | 30.8125201  |
| TYMP     | 2.144370103 | 5.257839545 | 10.13672391 | 4.00E-18 | 5.81E-16 | 30.67152316 |
| OAS1     | 1.76948904  | 3.819790372 | 10.05832319 | 6.25E-18 | 9.01E-16 | 30.23214293 |
| S100A8   | 4.063328511 | 7.835949218 | 10.04996683 | 6.56E-18 | 9.38E-16 | 30.18533293 |

|          |               |              |               |           |           |              |
|----------|---------------|--------------|---------------|-----------|-----------|--------------|
| CPPED1   | 1. 258772498  | 5. 054380153 | 10. 02620995  | 7. 51E-18 | 1. 07E-15 | 30. 05227698 |
| THEMIS2  | 1. 570023278  | 6. 067769506 | 10. 01510247  | 8. 00E-18 | 1. 13E-15 | 29. 99007904 |
| SCPEP1   | 2. 298982684  | 5. 313692399 | 9. 999215053  | 8. 75E-18 | 1. 23E-15 | 29. 90112868 |
| FKBP15   | 1. 014488867  | 4. 845502874 | 9. 980555355  | 9. 73E-18 | 1. 35E-15 | 29. 79667766 |
| CASP1    | 1. 545714536  | 5. 3299624   | 9. 967251855  | 1. 05E-17 | 1. 45E-15 | 29. 7222228  |
| CLEC1A   | 0. 732915471  | 0. 519701502 | 9. 958822835  | 1. 10E-17 | 1. 51E-15 | 29. 6750547  |
| CARD16   | 1. 269757546  | 4. 021903748 | 9. 95549142   | 1. 12E-17 | 1. 53E-15 | 29. 65641369 |
| SGK1     | 1. 989927757  | 2. 824965197 | 9. 914738908  | 1. 42E-17 | 1. 91E-15 | 29. 42844287 |
| SRGAP2B  | 0. 819023193  | 1. 249030641 | 9. 900531397  | 1. 53E-17 | 2. 06E-15 | 29. 34899256 |
| TFEB     | 1. 548273803  | 3. 251001517 | 9. 898315587  | 1. 55E-17 | 2. 07E-15 | 29. 33660273 |
| DOK2     | 1. 758605705  | 4. 973141898 | 9. 893486365  | 1. 60E-17 | 2. 11E-15 | 29. 30960106 |
| CX3CR1   | 2. 914939376  | 4. 945756337 | 9. 872408181  | 1. 80E-17 | 2. 37E-15 | 29. 19176589 |
| Clorf162 | 1. 705060638  | 5. 92191534  | 9. 870777335  | 1. 82E-17 | 2. 37E-15 | 29. 18265016 |
| GPR65    | 1. 628447704  | 2. 970233865 | 9. 867512458  | 1. 85E-17 | 2. 40E-15 | 29. 16440147 |
| PLD2     | 1. 63516889   | 2. 516458522 | 9. 840549572  | 2. 16E-17 | 2. 78E-15 | 29. 01372511 |
| UBXN11   | 1. 418622007  | 5. 094976191 | 9. 808963109  | 2. 58E-17 | 3. 31E-15 | 28. 83727968 |
| AP1S2    | 1. 571555792  | 5. 05034129  | 9. 778980804  | 3. 06E-17 | 3. 89E-15 | 28. 66986571 |
| GIMAP1   | 1. 440047119  | 3. 270798128 | 9. 751086304  | 3. 59E-17 | 4. 53E-15 | 28. 51417272 |
| NADK     | 1. 098750132  | 5. 62475828  | 9. 734123583  | 3. 95E-17 | 4. 96E-15 | 28. 41952579 |
| FCN1     | 3. 276862928  | 5. 620795074 | 9. 727650221  | 4. 10E-17 | 5. 11E-15 | 28. 3834125  |
| ATP6VOD1 | 0. 98860227   | 4. 981982177 | 9. 694596471  | 4. 94E-17 | 6. 12E-15 | 28. 19906756 |
| KCNQ1    | 1. 913712077  | 3. 175357884 | 9. 683962659  | 5. 25E-17 | 6. 46E-15 | 28. 13978082 |
| BCL6     | 2. 058933751  | 4. 502893014 | 9. 674209522  | 5. 54E-17 | 6. 79E-15 | 28. 08541252 |
| CD163    | 3. 30996502   | 3. 301821017 | 9. 649148291  | 6. 39E-17 | 7. 77E-15 | 27. 94574746 |
| NLRP3    | 1. 504726832  | 4. 987100716 | 9. 635957759  | 6. 89E-17 | 8. 32E-15 | 27. 87225911 |
| PRKACA   | 0. 879357594  | 4. 735777721 | 9. 628045639  | 7. 20E-17 | 8. 65E-15 | 27. 82818567 |
| UNC93B1  | 1. 386709383  | 5. 499997075 | 9. 604792715  | 8. 22E-17 | 9. 81E-15 | 27. 69869043 |
| ARPC1B   | 1. 092910932  | 7. 015667008 | 9. 595029631  | 8. 68E-17 | 1. 03E-14 | 27. 64433437 |
| CDA      | 2. 852000692  | 4. 441763504 | 9. 517282919  | 1. 35E-16 | 1. 59E-14 | 27. 21179237 |
| HMOX1    | 2. 417412737  | 3. 843200019 | 9. 489128004  | 1. 58E-16 | 1. 85E-14 | 27. 05529449 |
| FAM20C   | 1. 882903583  | 2. 611780418 | 9. 477508268  | 1. 69E-16 | 1. 97E-14 | 26. 99072922 |
| CTSB     | 1. 391410585  | 6. 799956979 | 9. 451504975  | 1. 95E-16 | 2. 26E-14 | 26. 84628991 |
| MNDA     | 2. 45050637   | 7. 196184452 | 9. 420981062  | 2. 32E-16 | 2. 67E-14 | 26. 67682695 |
| ITGA7    | 1. 723213163  | 2. 464233437 | 9. 411052396  | 2. 46E-16 | 2. 81E-14 | 26. 6217254  |
| CLEC10A  | 2. 613839652  | 2. 091705368 | 9. 39469717   | 2. 69E-16 | 3. 07E-14 | 26. 53098035 |
| P2RX7    | 1. 455060921  | 4. 362406599 | 9. 367365455  | 3. 14E-16 | 3. 56E-14 | 26. 37939612 |
| ADAP1    | 1. 345109492  | 3. 353238454 | 9. 357844337  | 3. 32E-16 | 3. 73E-14 | 26. 32660972 |
| CD68     | 1. 160076127  | 1. 972828693 | 9. 341734764  | 3. 63E-16 | 4. 06E-14 | 26. 23731817 |
| SGSH     | 1. 813412125  | 2. 999590106 | 9. 335089438  | 3. 77E-16 | 4. 19E-14 | 26. 20049288 |
| NPC2     | 0. 957784914  | 6. 122565241 | 9. 328251964  | 3. 92E-16 | 4. 33E-14 | 26. 16260781 |
| HTR7     | 1. 760774261  | 1. 453878532 | 9. 324757005  | 4. 00E-16 | 4. 39E-14 | 26. 14324491 |
| NOD2     | 2. 049422072  | 3. 361229903 | 9. 322445606  | 4. 05E-16 | 4. 43E-14 | 26. 13043995 |
| IL31RA   | 1. 30860862   | 0. 800184855 | 9. 320824836  | 4. 09E-16 | 4. 44E-14 | 26. 12146137 |
| IFNGR1   | 1. 213193955  | 6. 613125242 | 9. 306766135  | 4. 42E-16 | 4. 78E-14 | 26. 0435925  |
| MAP2K1   | 0. 880658956  | 5. 353249431 | 9. 264908356  | 5. 60E-16 | 6. 02E-14 | 25. 81187959 |
| CFP      | 1. 783589296  | 5. 439347941 | 9. 252093027  | 6. 02E-16 | 6. 43E-14 | 25. 74097718 |
| EMID1    | -2. 017618717 | 4. 730993841 | -9. 237229489 | 6. 54E-16 | 6. 96E-14 | 25. 65876644 |

|          |             |             |             |          |          |             |
|----------|-------------|-------------|-------------|----------|----------|-------------|
| SRGAP2C  | 0.827159432 | 2.2190975   | 9.233816033 | 6.67E-16 | 7.05E-14 | 25.6398901  |
| MYD88    | 1.065477781 | 6.81040454  | 9.216122    | 7.37E-16 | 7.75E-14 | 25.54206426 |
| TMEM132A | 0.683299757 | 0.581457498 | 9.21351397  | 7.47E-16 | 7.82E-14 | 25.52764822 |
| IER3     | 1.938093283 | 2.800883896 | 9.194777036 | 8.30E-16 | 8.60E-14 | 25.42410234 |
| EVI2B    | 1.143445371 | 8.239165693 | 9.151261501 | 1.06E-15 | 1.09E-13 | 25.18378465 |
| MSR1     | 1.819133606 | 1.175253943 | 9.139103898 | 1.14E-15 | 1.16E-13 | 25.11668454 |
| GNS      | 1.210826294 | 6.338024125 | 9.110684583 | 1.33E-15 | 1.36E-13 | 24.95990427 |
| TLR4     | 2.132524102 | 4.863340009 | 9.104542462 | 1.38E-15 | 1.40E-13 | 24.9260334  |
| TNFAIP2  | 2.16568954  | 5.991487958 | 9.100252355 | 1.41E-15 | 1.42E-13 | 24.90237832 |
| CRISPLD2 | 1.906017248 | 2.270341399 | 9.100074124 | 1.41E-15 | 1.42E-13 | 24.90139563 |
| PEA15    | 0.921904878 | 5.611009231 | 9.093491082 | 1.47E-15 | 1.46E-13 | 24.86510228 |
| ARHGAP30 | 0.879042655 | 6.895900002 | 9.073897619 | 1.64E-15 | 1.63E-13 | 24.75711299 |
| ABI3     | 1.875594614 | 3.334619586 | 9.072180864 | 1.65E-15 | 1.63E-13 | 24.74765344 |
| TIGAR    | 1.074961199 | 3.15987954  | 9.069177388 | 1.68E-15 | 1.65E-13 | 24.73110479 |
| DPYD     | 1.618364087 | 4.926667897 | 9.061573088 | 1.75E-15 | 1.72E-13 | 24.68921156 |
| RASSF3   | 0.913473759 | 5.580033678 | 9.011329416 | 2.32E-15 | 2.25E-13 | 24.41260088 |
| VSIR     | 1.786730824 | 7.03775136  | 8.981986304 | 2.74E-15 | 2.64E-13 | 24.25121043 |
| GIMAP8   | 1.997004167 | 3.311034213 | 8.969911911 | 2.93E-15 | 2.81E-13 | 24.18483361 |
| TBC1D2   | 1.208379151 | 4.769329342 | 8.968581821 | 2.95E-15 | 2.82E-13 | 24.17752288 |
| CAPN2    | 1.488627557 | 5.179673564 | 8.950928397 | 3.26E-15 | 3.09E-13 | 24.08051532 |
| ARRB2    | 1.143340424 | 6.792434636 | 8.947349528 | 3.32E-15 | 3.14E-13 | 24.06085424 |
| ANXA5    | 2.407784662 | 5.291382602 | 8.944060252 | 3.39E-15 | 3.18E-13 | 24.04278565 |
| DHRS9    | 2.217163272 | 2.857617515 | 8.931792301 | 3.63E-15 | 3.38E-13 | 23.97540877 |
| TMEM127  | 0.676623173 | 5.737906135 | 8.931642891 | 3.63E-15 | 3.38E-13 | 23.97458832 |
| PTPRE    | 1.194085716 | 5.477677298 | 8.92742838  | 3.72E-15 | 3.44E-13 | 23.9514467  |
| SOAT1    | 0.872523165 | 4.834296189 | 8.910195077 | 4.09E-15 | 3.77E-13 | 23.85684552 |
| LGALS3   | 2.054065429 | 4.435377141 | 8.909645472 | 4.10E-15 | 3.77E-13 | 23.85382918 |
| MAP3K3   | 0.88099827  | 5.553838743 | 8.904000701 | 4.24E-15 | 3.87E-13 | 23.82285206 |
| CTSH     | 1.496549924 | 4.45395517  | 8.894110261 | 4.48E-15 | 4.07E-13 | 23.76858662 |
| KMO      | 0.917663359 | 1.929862187 | 8.86523961  | 5.26E-15 | 4.76E-13 | 23.6102631  |
| FPR1     | 2.873638081 | 3.767089206 | 8.862327495 | 5.34E-15 | 4.81E-13 | 23.59430002 |
| KCNE1    | 1.657017744 | 1.811483873 | 8.844691666 | 5.90E-15 | 5.29E-13 | 23.49765361 |
| FCGR2A   | 2.003525712 | 4.491287686 | 8.838868071 | 6.09E-15 | 5.44E-13 | 23.46574958 |
| LILRA2   | 1.785647984 | 4.77350802  | 8.825101378 | 6.58E-15 | 5.82E-13 | 23.3903498  |
| RNF135   | 0.775490665 | 4.899659455 | 8.824915457 | 6.58E-15 | 5.82E-13 | 23.38933171 |
| USP3     | 0.812622977 | 5.167163092 | 8.819457625 | 6.79E-15 | 5.98E-13 | 23.35944721 |
| FBP1     | 2.362977858 | 3.899805908 | 8.796648201 | 7.71E-15 | 6.76E-13 | 23.23460148 |
| PRLR     | 1.647464957 | 1.188476145 | 8.794081175 | 7.82E-15 | 6.82E-13 | 23.22055591 |
| ARHGAP24 | 1.247447504 | 1.541763167 | 8.788064784 | 8.08E-15 | 7.02E-13 | 23.18764091 |
| NPTN     | 0.688872292 | 5.329660546 | 8.785859387 | 8.18E-15 | 7.08E-13 | 23.1755768  |
| ARHGAP26 | 1.14412492  | 4.232097788 | 8.784427705 | 8.25E-15 | 7.10E-13 | 23.1677455  |
| S100A12  | 3.718381071 | 5.358097062 | 8.776011083 | 8.65E-15 | 7.41E-13 | 23.12171288 |
| LACTB    | 0.804933113 | 4.17897374  | 8.771291478 | 8.88E-15 | 7.54E-13 | 23.09590488 |
| SGMS2    | 2.012691005 | 2.44308821  | 8.757293477 | 9.59E-15 | 8.12E-13 | 23.01938016 |
| SLC12A9  | 1.159384358 | 4.336475342 | 8.752166627 | 9.87E-15 | 8.32E-13 | 22.99136003 |
| ALOX5AP  | 2.091458725 | 5.747483354 | 8.737493474 | 1.07E-14 | 8.98E-13 | 22.91118815 |
| AQP9     | 2.529661077 | 2.724124409 | 8.715447194 | 1.21E-14 | 1.01E-12 | 22.79079332 |

|          |               |              |               |           |           |              |
|----------|---------------|--------------|---------------|-----------|-----------|--------------|
| HCK      | 1. 9567191    | 6. 00499591  | 8. 701345657  | 1. 31E-14 | 1. 09E-12 | 22. 71382461 |
| MSANTD3  | -0. 745063841 | 3. 349751704 | -8. 694489963 | 1. 36E-14 | 1. 13E-12 | 22. 67641631 |
| GLIPR2   | 1. 452596767  | 5. 75363068  | 8. 692529424  | 1. 38E-14 | 1. 13E-12 | 22. 66571994 |
| TNFSF13  | 1. 175854394  | 4. 107617136 | 8. 685545802  | 1. 43E-14 | 1. 17E-12 | 22. 62762341 |
| AOAH     | 1. 846664422  | 6. 124721998 | 8. 672410538  | 1. 54E-14 | 1. 25E-12 | 22. 55598995 |
| EHD4     | 1. 274366614  | 3. 221929073 | 8. 660001235  | 1. 65E-14 | 1. 34E-12 | 22. 48834089 |
| SHTN1    | 1. 914482635  | 1. 810420318 | 8. 653717065  | 1. 71E-14 | 1. 38E-12 | 22. 45409232 |
| SIGLEC11 | 1. 22414827   | 0. 919149087 | 8. 644488542  | 1. 80E-14 | 1. 44E-12 | 22. 40380866 |
| FGD4     | 1. 8639103    | 3. 06556247  | 8. 638554113  | 1. 86E-14 | 1. 49E-12 | 22. 37148091 |
| LFNG     | 1. 659608324  | 4. 239876057 | 8. 633552976  | 1. 91E-14 | 1. 52E-12 | 22. 34424171 |
| ZBTB7B   | 1. 362973698  | 5. 450325155 | 8. 631782295  | 1. 93E-14 | 1. 53E-12 | 22. 33459849 |
| RIN2     | 1. 629933096  | 2. 534822554 | 8. 626998098  | 1. 98E-14 | 1. 56E-12 | 22. 30854609 |
| SLC66A3  | 0. 792256795  | 5. 435098051 | 8. 618775233  | 2. 07E-14 | 1. 63E-12 | 22. 26377713 |
| MCEMP1   | 2. 011582878  | 3. 912467619 | 8. 604223063  | 2. 24E-14 | 1. 76E-12 | 22. 1845759  |
| PKIB     | 1. 403235367  | 1. 289237565 | 8. 574768094  | 2. 64E-14 | 2. 06E-12 | 22. 02437277 |
| GLTP     | 0. 669898186  | 4. 796375396 | 8. 570130328  | 2. 71E-14 | 2. 11E-12 | 21. 99916158 |
| MS4A4E   | 2. 491347368  | 4. 989269457 | 8. 565596012  | 2. 78E-14 | 2. 16E-12 | 21. 97451626 |
| SLC31A1  | 0. 934749695  | 4. 050980923 | 8. 56398235   | 2. 80E-14 | 2. 17E-12 | 21. 96574638 |
| S100A6   | 1. 73044616   | 7. 328031731 | 8. 542781724  | 3. 15E-14 | 2. 43E-12 | 21. 85056688 |
| ATG3     | 0. 809144219  | 5. 264297105 | 8. 541098675  | 3. 18E-14 | 2. 44E-12 | 21. 84142643 |
| FCGR2B   | 1. 338255647  | 1. 712670385 | 8. 532345856  | 3. 34E-14 | 2. 55E-12 | 21. 79389869 |
| GIMAP4   | 2. 122273075  | 4. 412642555 | 8. 52873279   | 3. 41E-14 | 2. 59E-12 | 21. 77428361 |
| RAB31    | 2. 225709506  | 4. 434589745 | 8. 524584627  | 3. 49E-14 | 2. 64E-12 | 21. 75176628 |
| GM2A     | 0. 893575596  | 5. 823188851 | 8. 515255827  | 3. 67E-14 | 2. 76E-12 | 21. 70113794 |
| MTMR14   | 0. 647828348  | 5. 279052807 | 8. 515244265  | 3. 67E-14 | 2. 76E-12 | 21. 7010752  |
| GRN      | 1. 697572542  | 8. 333753343 | 8. 504066238  | 3. 91E-14 | 2. 92E-12 | 21. 6404308  |
| CD209    | 1. 069101063  | 0. 798878388 | 8. 471659386  | 4. 67E-14 | 3. 47E-12 | 21. 4647366  |
| RCN3     | 1. 609067644  | 3. 033534293 | 8. 443876452  | 5. 45E-14 | 4. 03E-12 | 21. 31425886 |
| EVI2A    | 1. 121275248  | 6. 220863724 | 8. 426778481  | 5. 98E-14 | 4. 41E-12 | 21. 22172164 |
| UBE2D1   | 1. 033392998  | 4. 663274446 | 8. 416287794  | 6. 34E-14 | 4. 66E-12 | 21. 16497033 |
| NFAM1    | 2. 413022396  | 4. 829114395 | 8. 41064726   | 6. 54E-14 | 4. 78E-12 | 21. 13446508 |
| IL17RA   | 1. 650986144  | 6. 196942285 | 8. 403137984  | 6. 82E-14 | 4. 97E-12 | 21. 09386226 |
| MFSD2A   | 1. 36556328   | 2. 56398814  | 8. 388253818  | 7. 40E-14 | 5. 37E-12 | 21. 01341376 |
| IFNGR2   | 0. 986204027  | 5. 898829393 | 8. 380487245  | 7. 72E-14 | 5. 58E-12 | 20. 97145183 |
| CPM      | 1. 825113073  | 2. 211191747 | 8. 379329677  | 7. 77E-14 | 5. 58E-12 | 20. 96519858 |
| IFNK     | 1. 122795439  | 1. 430294495 | 8. 379204073  | 7. 78E-14 | 5. 58E-12 | 20. 96452007 |
| MVP      | 1. 159219751  | 5. 112826719 | 8. 376822818  | 7. 88E-14 | 5. 64E-12 | 20. 95165721 |
| STS      | 1. 388315644  | 3. 004809289 | 8. 36854508   | 8. 24E-14 | 5. 88E-12 | 20. 90695141 |
| FAM49A   | 1. 552706459  | 4. 219680262 | 8. 367755091  | 8. 28E-14 | 5. 88E-12 | 20. 90268556 |
| GPR132   | 1. 328166858  | 3. 868632396 | 8. 359759037  | 8. 65E-14 | 6. 12E-12 | 20. 85951432 |
| ANXA2    | 1. 975437861  | 5. 247050435 | 8. 357493828  | 8. 76E-14 | 6. 18E-12 | 20. 84728648 |
| NAAA     | 1. 007843558  | 4. 83813799  | 8. 340886683  | 9. 60E-14 | 6. 74E-12 | 20. 75766862 |
| TYROBP   | 1. 642795383  | 8. 420192138 | 8. 336024381  | 9. 86E-14 | 6. 90E-12 | 20. 73143977 |
| IQSEC2   | 1. 401022393  | 2. 861766531 | 8. 334105085  | 9. 96E-14 | 6. 95E-12 | 20. 72108769 |
| KDM5B    | -1. 046126419 | 5. 705007534 | -8. 33133493  | 1. 01E-13 | 7. 03E-12 | 20. 70614757 |
| STX12    | 0. 666971035  | 5. 003269211 | 8. 31535704   | 1. 10E-13 | 7. 65E-12 | 20. 62000331 |
| NLRP1    | 1. 477505636  | 5. 010788772 | 8. 311157075  | 1. 13E-13 | 7. 80E-12 | 20. 59736739 |

|          |              |             |              |          |          |             |
|----------|--------------|-------------|--------------|----------|----------|-------------|
| MYO1F    | 1.111681085  | 6.912238258 | 8.310008796  | 1.14E-13 | 7.82E-12 | 20.59117928 |
| CSF1R    | 1.813366093  | 6.339339396 | 8.304388757  | 1.17E-13 | 8.02E-12 | 20.56089631 |
| FBXL5    | 0.825157036  | 6.50106245  | 8.304226876  | 1.17E-13 | 8.02E-12 | 20.56002412 |
| NACC2    | 1.573613634  | 3.554447265 | 8.301234584  | 1.19E-13 | 8.12E-12 | 20.54390304 |
| CAP1     | 0.830232994  | 8.214306905 | 8.29588876   | 1.23E-13 | 8.32E-12 | 20.5151065  |
| KCNK13   | 0.724298798  | 0.419936514 | 8.295452475  | 1.23E-13 | 8.32E-12 | 20.51275659 |
| BST1     | 1.609232054  | 4.817481794 | 8.294581553  | 1.24E-13 | 8.33E-12 | 20.50806576 |
| GUCY2C   | 0.739946306  | 0.469180177 | 8.292325116  | 1.25E-13 | 8.41E-12 | 20.49591314 |
| OSTF1    | 0.863234387  | 6.633833229 | 8.28863516   | 1.28E-13 | 8.55E-12 | 20.47604206 |
| DAPP1    | 1.248273629  | 4.797974564 | 8.270456955  | 1.41E-13 | 9.41E-12 | 20.37818757 |
| PTPRJ    | 1.698562135  | 4.429822461 | 8.269931483  | 1.42E-13 | 9.41E-12 | 20.37535987 |
| FCGRT    | 1.716431571  | 5.530985589 | 8.263821671  | 1.47E-13 | 9.70E-12 | 20.34248538 |
| SIGLEC1  | 2.180399765  | 1.859803923 | 8.254203973  | 1.54E-13 | 1.02E-11 | 20.2907511  |
| UNC119   | 1.01318381   | 3.949262843 | 8.248060357  | 1.60E-13 | 1.05E-11 | 20.25771363 |
| TLR1     | 1.364709788  | 4.200024446 | 8.243173739  | 1.64E-13 | 1.08E-11 | 20.231441   |
| ODF3B    | 1.653701249  | 4.003443613 | 8.239825851  | 1.67E-13 | 1.09E-11 | 20.21344398 |
| HSPA6    | 1.406435898  | 1.778903607 | 8.238526188  | 1.68E-13 | 1.10E-11 | 20.20645806 |
| FLVCR2   | 1.184127799  | 2.515657    | 8.236853105  | 1.70E-13 | 1.10E-11 | 20.19746544 |
| PAK1     | 1.193940606  | 5.556851513 | 8.236211061  | 1.70E-13 | 1.10E-11 | 20.19401468 |
| OGFRL1   | 1.268681533  | 4.912040448 | 8.23038013   | 1.76E-13 | 1.13E-11 | 20.16267918 |
| ITGAL    | 1.45920057   | 6.810286802 | 8.226927665  | 1.79E-13 | 1.15E-11 | 20.14412876 |
| HORMAD1  | 1.223617131  | 1.475646376 | 8.223518528  | 1.83E-13 | 1.17E-11 | 20.12581347 |
| FCGR1B   | 1.277876709  | 1.772438313 | 8.214576874  | 1.92E-13 | 1.22E-11 | 20.07778619 |
| TNFRSF8  | 1.236970115  | 1.516936533 | 8.197525267  | 2.11E-13 | 1.34E-11 | 19.98624313 |
| METTL9   | 0.807257533  | 5.780470408 | 8.161583414  | 2.56E-13 | 1.63E-11 | 19.79347813 |
| ARPC5    | 0.815001692  | 5.605474429 | 8.154509812  | 2.66E-13 | 1.68E-11 | 19.75557162 |
| GPCPD1   | 0.85160654   | 6.065804439 | 8.141844257  | 2.86E-13 | 1.80E-11 | 19.6877242  |
| ZNF273   | -0.971987022 | 3.143555416 | -8.117096505 | 3.27E-13 | 2.05E-11 | 19.5552499  |
| ZNF529   | -0.773027543 | 4.19175227  | -8.114090445 | 3.32E-13 | 2.08E-11 | 19.53916717 |
| ITGAX    | 1.951441361  | 5.574569174 | 8.112308781  | 3.35E-13 | 2.09E-11 | 19.52963598 |
| RGS2     | 2.185197382  | 5.67184092  | 8.111218643  | 3.37E-13 | 2.10E-11 | 19.52380451 |
| ACVRL1   | 1.038267764  | 0.99021796  | 8.10556689   | 3.48E-13 | 2.16E-11 | 19.49357556 |
| SH2B3    | 0.837359317  | 6.301788747 | 8.100532596  | 3.58E-13 | 2.21E-11 | 19.46665479 |
| VNN2     | 2.233862656  | 3.797260043 | 8.09192176   | 3.75E-13 | 2.31E-11 | 19.42062087 |
| SLC2A9   | 1.268287521  | 2.689136643 | 8.072808331  | 4.16E-13 | 2.55E-11 | 19.31849552 |
| NAGK     | 0.792203905  | 5.247299873 | 8.069235017  | 4.24E-13 | 2.60E-11 | 19.29941147 |
| VNN3     | 1.627498709  | 1.52826499  | 8.063843662  | 4.37E-13 | 2.66E-11 | 19.27062292 |
| CDH23    | 1.103607254  | 1.753270731 | 8.061264397  | 4.43E-13 | 2.69E-11 | 19.25685245 |
| OTUD1    | 1.119191467  | 4.231977993 | 8.060941024  | 4.44E-13 | 2.69E-11 | 19.25512609 |
| FCGR1A   | 1.569786158  | 3.174202038 | 8.056716406  | 4.54E-13 | 2.74E-11 | 19.23257458 |
| CDC42EP3 | 1.597468195  | 4.271784698 | 8.050527647  | 4.70E-13 | 2.83E-11 | 19.19954517 |
| ZSWIM6   | 0.903493793  | 4.711825204 | 8.045467778  | 4.83E-13 | 2.90E-11 | 19.17254674 |
| DUSP6    | 1.786473722  | 6.221837491 | 8.023760897  | 5.43E-13 | 3.24E-11 | 19.05678585 |
| MOB3A    | 0.849043215  | 6.726632632 | 8.01620961   | 5.66E-13 | 3.37E-11 | 19.01653943 |
| ARPC4    | 0.587042627  | 5.881482007 | 8.003163619  | 6.08E-13 | 3.60E-11 | 18.94703691 |
| TBC1D9   | 1.540802193  | 2.592882436 | 7.991462517  | 6.47E-13 | 3.83E-11 | 18.88473098 |
| F5       | 1.686127123  | 2.113048935 | 7.989667824  | 6.54E-13 | 3.86E-11 | 18.87517727 |

|            |              |             |              |          |          |             |
|------------|--------------|-------------|--------------|----------|----------|-------------|
| IL10RB     | 0.786348164  | 5.803915927 | 7.981697588  | 6.83E-13 | 4.01E-11 | 18.83275781 |
| HCLS1      | 0.738368961  | 7.022324465 | 7.968202957  | 7.34E-13 | 4.31E-11 | 18.76096826 |
| EFHD2      | 1.004374209  | 7.37431481  | 7.967318028  | 7.38E-13 | 4.31E-11 | 18.75626197 |
| CDK6       | -1.169560325 | 7.442171529 | -7.961279723 | 7.63E-13 | 4.44E-11 | 18.7241533  |
| ZNF10      | -0.848013103 | 2.960462244 | -7.955845386 | 7.85E-13 | 4.56E-11 | 18.69526319 |
| ZNF875     | -0.626872423 | 4.471518727 | -7.944849594 | 8.34E-13 | 4.81E-11 | 18.63682735 |
| LST1       | 1.734120029  | 5.94027799  | 7.944826295  | 8.34E-13 | 4.81E-11 | 18.63670356 |
| PIK3R5     | 1.094451726  | 4.979591384 | 7.935428348  | 8.77E-13 | 5.05E-11 | 18.58678083 |
| FRAT1      | 0.964277338  | 4.289900507 | 7.934807942  | 8.80E-13 | 5.05E-11 | 18.58348588 |
| RHBDF2     | 1.234730059  | 4.767639266 | 7.923387041  | 9.36E-13 | 5.34E-11 | 18.52284543 |
| BRI3       | 0.896815867  | 4.142097122 | 7.918636941  | 9.61E-13 | 5.47E-11 | 18.49763297 |
| ASGR1      | 0.848553164  | 1.500019672 | 7.916740866  | 9.71E-13 | 5.51E-11 | 18.48757046 |
| LIPN       | 1.640071403  | 1.935434975 | 7.8959436    | 1.09E-12 | 6.14E-11 | 18.37725266 |
| NAMPT      | 1.596537725  | 4.648581306 | 7.888596539  | 1.13E-12 | 6.38E-11 | 18.33830427 |
| CST3       | 2.090614574  | 6.849885462 | 7.880139771  | 1.18E-12 | 6.65E-11 | 18.29348843 |
| AGTRAP     | 1.257688334  | 5.675226034 | 7.862750701  | 1.30E-12 | 7.29E-11 | 18.20138856 |
| LTA4H      | 1.006612189  | 6.13045807  | 7.861850194  | 1.31E-12 | 7.30E-11 | 18.19662101 |
| FRAT2      | 0.866973716  | 5.237327918 | 7.856430398  | 1.34E-12 | 7.50E-11 | 18.16793094 |
| IL4I1      | 1.092336952  | 1.333752756 | 7.855637759  | 1.35E-12 | 7.51E-11 | 18.16373562 |
| PPM1M      | 1.089086671  | 4.674538714 | 7.850421437  | 1.39E-12 | 7.70E-11 | 18.13613008 |
| RASSF2     | 0.966710329  | 6.725843193 | 7.841014874  | 1.46E-12 | 8.08E-11 | 18.08636523 |
| PPT2       | -0.924547859 | 3.893757702 | -7.830531643 | 1.55E-12 | 8.52E-11 | 18.03092875 |
| CD93       | 2.238873333  | 5.066013782 | 7.825462934  | 1.59E-12 | 8.74E-11 | 18.00413413 |
| CREB5      | 1.511537021  | 2.288509032 | 7.81931113   | 1.64E-12 | 9.01E-11 | 17.9716221  |
| IQGAP1     | 1.172195212  | 6.465019587 | 7.80494245   | 1.78E-12 | 9.70E-11 | 17.89571911 |
| AL928654.5 | 0.95211165   | 1.122376697 | 7.80053392   | 1.82E-12 | 9.91E-11 | 17.87244075 |
| CD36       | 2.26149908   | 4.978541522 | 7.797136188  | 1.85E-12 | 1.01E-10 | 17.85450285 |
| ADGRE3     | 1.744311248  | 1.892010387 | 7.788505382  | 1.94E-12 | 1.05E-10 | 17.80895    |
| AKIRIN2    | 0.601206521  | 6.411861219 | 7.777565343  | 2.06E-12 | 1.11E-10 | 17.7512348  |
| CACNA2D3   | 1.513208729  | 1.810206296 | 7.771310161  | 2.13E-12 | 1.14E-10 | 17.71824792 |
| CD180      | 1.930883936  | 4.719905431 | 7.766655965  | 2.18E-12 | 1.17E-10 | 17.69371    |
| IRF5       | 1.012890148  | 5.830236857 | 7.762929377  | 2.23E-12 | 1.19E-10 | 17.6740664  |
| WARS       | 1.026212804  | 5.771233178 | 7.749722738  | 2.39E-12 | 1.27E-10 | 17.60447861 |
| BBOF1      | -0.655884823 | 2.032859034 | -7.738981325 | 2.53E-12 | 1.35E-10 | 17.54791172 |
| MYO7A      | 1.435294512  | 1.324821171 | 7.731140502  | 2.64E-12 | 1.40E-10 | 17.50663782 |
| SLC31A2    | 1.010737157  | 2.554655528 | 7.717480963  | 2.84E-12 | 1.50E-10 | 17.43477034 |
| ZNF461     | -0.607770238 | 3.089933572 | -7.715268817 | 2.87E-12 | 1.52E-10 | 17.42313581 |
| SORT1      | 2.331558674  | 3.576674497 | 7.713894597  | 2.90E-12 | 1.52E-10 | 17.41590886 |
| NUMB       | 0.649541782  | 5.475464827 | 7.713377533  | 2.90E-12 | 1.52E-10 | 17.41318976 |
| PTPN18     | 0.867373683  | 6.231498401 | 7.709799596  | 2.96E-12 | 1.55E-10 | 17.39437622 |
| PUDP       | 0.888538982  | 3.557066386 | 7.693980265  | 3.22E-12 | 1.68E-10 | 17.31123284 |
| CXorf21    | 1.282202537  | 6.084469411 | 7.692115199  | 3.25E-12 | 1.69E-10 | 17.3014345  |
| ZMYND15    | 0.950074712  | 0.843572233 | 7.680692364  | 3.46E-12 | 1.80E-10 | 17.24144222 |
| PIK3AP1    | 0.924687109  | 6.522425452 | 7.674501279  | 3.58E-12 | 1.85E-10 | 17.2089405  |
| FCAR       | 2.266738577  | 3.726637299 | 7.672294668  | 3.62E-12 | 1.87E-10 | 17.19735864 |
| SPI1       | 0.967490748  | 7.805695382 | 7.670407892  | 3.66E-12 | 1.88E-10 | 17.18745646 |
| ACTB       | 0.733907899  | 11.84515227 | 7.665213117  | 3.76E-12 | 1.93E-10 | 17.16019788 |



|          |              |             |              |          |          |             |
|----------|--------------|-------------|--------------|----------|----------|-------------|
| SMAP2    | 0.945012253  | 7.363702843 | 7.661426671  | 3.84E-12 | 1.96E-10 | 17.1403335  |
| CD1A     | 0.815341521  | 0.643199317 | 7.6582657    | 3.90E-12 | 1.99E-10 | 17.12375324 |
| FCER2    | 1.829065648  | 3.23790388  | 7.656715028  | 3.93E-12 | 2.00E-10 | 17.11562041 |
| S100A11  | 1.634324642  | 8.116365333 | 7.646830421  | 4.15E-12 | 2.11E-10 | 17.06379277 |
| ALDH5A1  | -1.063731075 | 4.385145854 | -7.644478482 | 4.20E-12 | 2.13E-10 | 17.05146457 |
| SPOCK1   | 1.121901714  | 0.784689594 | 7.623222572  | 4.71E-12 | 2.38E-10 | 16.94011078 |
| LAPTM5   | 0.969819397  | 9.662457066 | 7.612799286  | 4.98E-12 | 2.51E-10 | 16.88554823 |
| ACER3    | 0.787588874  | 4.579518147 | 7.597053857  | 5.41E-12 | 2.72E-10 | 16.80317887 |
| TMEM170B | 1.43450087   | 4.776909936 | 7.59665479   | 5.42E-12 | 2.72E-10 | 16.80109205 |
| TFDP2    | -1.008538261 | 5.575139698 | -7.586137488 | 5.74E-12 | 2.86E-10 | 16.7461094  |
| SMIM14   | 1.165591525  | 3.394846774 | 7.573730232  | 6.13E-12 | 3.05E-10 | 16.68128329 |
| SYK      | 0.771290759  | 7.190146149 | 7.569111573  | 6.28E-12 | 3.12E-10 | 16.65716169 |
| SNX27    | 0.641009295  | 5.280422108 | 7.560633262  | 6.57E-12 | 3.25E-10 | 16.61289702 |
| PLD6     | -0.79459325  | 2.947256086 | -7.559512658 | 6.61E-12 | 3.27E-10 | 16.60704783 |
| ZNF8     | -0.712704205 | 3.954527042 | -7.552708352 | 6.86E-12 | 3.38E-10 | 16.57153863 |
| MYBPH    | 1.334398363  | 0.907683858 | 7.551288624  | 6.91E-12 | 3.39E-10 | 16.56413112 |
| TMSB4X   | 0.785251548  | 9.891855347 | 7.545835786  | 7.11E-12 | 3.49E-10 | 16.53568555 |
| GPR183   | 1.321300286  | 5.881356274 | 7.538433987  | 7.40E-12 | 3.62E-10 | 16.49708546 |
| PLEKH02  | 0.836498112  | 5.426521826 | 7.537624521  | 7.43E-12 | 3.62E-10 | 16.49286501 |
| ZNF703   | 1.389193294  | 1.678454142 | 7.530311018  | 7.72E-12 | 3.76E-10 | 16.45474114 |
| CD200R1  | 1.309241952  | 2.099388365 | 7.524747347  | 7.96E-12 | 3.86E-10 | 16.4257483  |
| BCKDHB   | -0.642643368 | 4.00574761  | -7.520534037 | 8.14E-12 | 3.94E-10 | 16.4037978  |
| EHBP1L1  | 0.958755974  | 6.17191974  | 7.509214133  | 8.64E-12 | 4.17E-10 | 16.34484673 |
| PJVK     | -0.670567443 | 2.128649171 | -7.507809541 | 8.71E-12 | 4.19E-10 | 16.33753437 |
| CMBL     | -1.218812433 | 3.843238225 | -7.504243132 | 8.87E-12 | 4.26E-10 | 16.31896988 |
| UPK3A    | 1.147394449  | 0.888237028 | 7.502442545  | 8.96E-12 | 4.29E-10 | 16.30959844 |
| MGAT1    | 0.667838413  | 6.207336938 | 7.501659384  | 8.99E-12 | 4.30E-10 | 16.30552263 |
| KIAA0930 | 0.854389764  | 5.667695376 | 7.498812685  | 9.13E-12 | 4.36E-10 | 16.29070891 |
| RPGRIP1  | 0.696137294  | 1.063012381 | 7.490644487  | 9.54E-12 | 4.54E-10 | 16.24821511 |
| FFAR2    | 1.473940708  | 1.744588345 | 7.487524923  | 9.70E-12 | 4.60E-10 | 16.23199078 |
| NDUF6    | -0.686031275 | 3.969244202 | -7.474684281 | 1.04E-11 | 4.91E-10 | 16.16523639 |
| C9orf43  | -1.530458427 | 3.183069606 | -7.46650099  | 1.08E-11 | 5.12E-10 | 16.12271734 |
| SERPINB2 | 2.155308026  | 2.753633584 | 7.458184732  | 1.13E-11 | 5.34E-10 | 16.07952603 |
| SNX18    | 0.814728306  | 4.369589038 | 7.453436321  | 1.16E-11 | 5.46E-10 | 16.05487312 |
| CCDC69   | 0.876696247  | 5.761811834 | 7.444940081  | 1.22E-11 | 5.69E-10 | 16.01077751 |
| ZNF571   | -0.845392652 | 2.542803688 | -7.443125588 | 1.23E-11 | 5.73E-10 | 16.00136282 |
| KYNU     | 1.475252986  | 2.184306621 | 7.439079868  | 1.25E-11 | 5.84E-10 | 15.98037442 |
| GNGT2    | 0.984755194  | 1.510502407 | 7.436592915  | 1.27E-11 | 5.90E-10 | 15.96747482 |
| KCNC3    | 1.354883158  | 1.472291828 | 7.434346155  | 1.29E-11 | 5.96E-10 | 15.95582254 |
| SERTAD3  | 0.69844479   | 3.757423982 | 7.43148304   | 1.31E-11 | 6.03E-10 | 15.94097569 |
| PDK4     | 1.91356514   | 2.195121961 | 7.430086229  | 1.31E-11 | 6.05E-10 | 15.93373327 |
| HLA-DMB  | 1.818100182  | 4.793624578 | 7.429920934  | 1.32E-11 | 6.05E-10 | 15.93287625 |
| CASTOR2  | -0.933310966 | 3.887576021 | -7.427022131 | 1.34E-11 | 6.13E-10 | 15.91784788 |
| RPGRIP1L | -0.607277264 | 1.628124875 | -7.415849773 | 1.42E-11 | 6.49E-10 | 15.8599483  |
| TGFBI    | 2.089937168  | 2.420146301 | 7.415567605  | 1.42E-11 | 6.49E-10 | 15.85848644 |
| CEBPB    | 1.461295407  | 5.441123409 | 7.414866763  | 1.43E-11 | 6.50E-10 | 15.8548556  |
| ANKRD27  | -0.886407202 | 5.406489645 | -7.413183374 | 1.44E-11 | 6.54E-10 | 15.84613506 |

|          |              |             |              |          |          |             |
|----------|--------------|-------------|--------------|----------|----------|-------------|
| ZNF566   | -0.722664771 | 3.155348321 | -7.411826762 | 1.45E-11 | 6.57E-10 | 15.83910791 |
| TMEM71   | 0.821843964  | 5.680512432 | 7.410310456  | 1.46E-11 | 6.61E-10 | 15.83125416 |
| TADA2B   | 0.61762122   | 3.488385362 | 7.406283084  | 1.49E-11 | 6.73E-10 | 15.81039735 |
| EPHB2    | 0.874608558  | 0.60080451  | 7.405133247  | 1.50E-11 | 6.76E-10 | 15.80444344 |
| ARAP1    | 0.972777873  | 6.048627619 | 7.397847647  | 1.56E-11 | 7.01E-10 | 15.76672683 |
| CDC42EP1 | 1.592870571  | 1.759294306 | 7.387398395  | 1.65E-11 | 7.36E-10 | 15.71265819 |
| VMP1     | 0.835947487  | 6.108875047 | 7.387244314  | 1.65E-11 | 7.36E-10 | 15.71186114 |
| OAZ1     | 0.601437471  | 7.988516991 | 7.381258423  | 1.70E-11 | 7.58E-10 | 15.68090173 |
| TPP1     | 0.680224453  | 8.568303369 | 7.380405903  | 1.71E-11 | 7.60E-10 | 15.67649326 |
| B4GALT1  | 0.674007701  | 5.868795708 | 7.362196353  | 1.88E-11 | 8.33E-10 | 15.58237846 |
| PRKCD    | 1.207322251  | 6.83528728  | 7.362060002  | 1.88E-11 | 8.33E-10 | 15.58167409 |
| JAK2     | 0.886203668  | 5.527801712 | 7.360815201  | 1.90E-11 | 8.37E-10 | 15.57524388 |
| ZDHHC9   | -0.758845159 | 4.104839287 | -7.354986716 | 1.96E-11 | 8.61E-10 | 15.54514176 |
| TREM1    | 1.891501459  | 4.039106566 | 7.353544841  | 1.97E-11 | 8.66E-10 | 15.53769645 |
| TASP1    | -0.62260108  | 3.809497116 | -7.351531127 | 1.99E-11 | 8.73E-10 | 15.52729937 |
| SNN      | 0.901958324  | 4.624059473 | 7.350214923  | 2.01E-11 | 8.77E-10 | 15.52050424 |
| GAA      | 1.308728186  | 5.339856175 | 7.343960877  | 2.07E-11 | 9.02E-10 | 15.4882234  |
| EVI5     | 0.940473689  | 3.167106133 | 7.337575469  | 2.14E-11 | 9.29E-10 | 15.45527596 |
| TLR6     | 1.33307555   | 3.723108823 | 7.336735835  | 2.15E-11 | 9.31E-10 | 15.45094448 |
| DNAJC5   | 0.681896893  | 5.821633326 | 7.335266982  | 2.17E-11 | 9.36E-10 | 15.44336749 |
| GRK4     | -0.665302898 | 2.724808258 | -7.326499887 | 2.27E-11 | 9.78E-10 | 15.39815571 |
| AHNAK    | 1.259906471  | 7.843533598 | 7.324465727  | 2.30E-11 | 9.87E-10 | 15.38766871 |
| ADAM22   | -0.960279578 | 1.600604217 | -7.321844139 | 2.33E-11 | 9.98E-10 | 15.37415501 |
| RGS19    | 0.860012386  | 6.585377363 | 7.317379335  | 2.38E-11 | 1.02E-09 | 15.35114447 |
| SERPINB8 | 1.507070394  | 4.943419245 | 7.311425507  | 2.46E-11 | 1.05E-09 | 15.32046875 |
| ZCWPW1   | 0.790534178  | 3.577620512 | 7.30374777   | 2.56E-11 | 1.09E-09 | 15.28092603 |
| ITGB7    | 1.387258837  | 4.276810181 | 7.300618942  | 2.60E-11 | 1.10E-09 | 15.26481647 |
| CLBA1    | -0.704484298 | 2.276878736 | -7.300565048 | 2.60E-11 | 1.10E-09 | 15.264539   |
| PPT1     | 0.765370348  | 7.358764495 | 7.300206473  | 2.61E-11 | 1.10E-09 | 15.26269297 |
| METTL7B  | 2.079086601  | 3.135184607 | 7.294559286  | 2.69E-11 | 1.13E-09 | 15.23362482 |
| ZNF138   | -0.757634897 | 4.311833695 | -7.281454506 | 2.88E-11 | 1.21E-09 | 15.16620525 |
| ZFP36    | 1.268475787  | 8.546543736 | 7.272364783  | 3.02E-11 | 1.27E-09 | 15.11947105 |
| VPS37C   | 0.706720006  | 3.836060615 | 7.269436533  | 3.07E-11 | 1.28E-09 | 15.10442077 |
| FAM49B   | 0.602741815  | 5.563100923 | 7.264922317  | 3.14E-11 | 1.31E-09 | 15.08122403 |
| PRNP     | 0.976554284  | 5.928159528 | 7.25488672   | 3.31E-11 | 1.38E-09 | 15.02967648 |
| SNX11    | 0.601092485  | 4.569563705 | 7.248832034  | 3.42E-11 | 1.42E-09 | 14.99859105 |
| SLC26A11 | 1.079652613  | 1.902615127 | 7.247218752  | 3.45E-11 | 1.43E-09 | 14.9903101  |
| CATSPER1 | 0.963644407  | 1.665102469 | 7.246731675  | 3.46E-11 | 1.43E-09 | 14.98781009 |
| LGALS1   | 1.897667089  | 7.670338398 | 7.24543661   | 3.48E-11 | 1.44E-09 | 14.98116328 |
| RIN1     | 1.216737217  | 2.352769366 | 7.24506789   | 3.49E-11 | 1.44E-09 | 14.97927094 |
| ZNF366   | 1.00437586   | 1.062885044 | 7.242420375  | 3.54E-11 | 1.45E-09 | 14.96568462 |
| PFKFB4   | 1.163240307  | 3.267448177 | 7.24180798   | 3.55E-11 | 1.46E-09 | 14.96254227 |
| SERPINA1 | 2.558622214  | 5.451767005 | 7.233179021  | 3.71E-11 | 1.52E-09 | 14.91827672 |
| CD53     | 0.800601716  | 8.671482078 | 7.23296623   | 3.71E-11 | 1.52E-09 | 14.91718541 |
| C3orf33  | -0.625509207 | 2.588402458 | -7.230997242 | 3.75E-11 | 1.53E-09 | 14.90708793 |
| ZNF165   | -0.640862697 | 1.757063446 | -7.22898247  | 3.79E-11 | 1.54E-09 | 14.89675685 |
| SIRPB2   | 1.598490309  | 5.355715365 | 7.220879695  | 3.96E-11 | 1.60E-09 | 14.85522067 |

|           |              |             |              |          |          |             |
|-----------|--------------|-------------|--------------|----------|----------|-------------|
| IRAK1BP1  | -0.75123692  | 2.713129458 | -7.211772786 | 4.15E-11 | 1.68E-09 | 14.80856039 |
| GYG1      | 0.698147093  | 5.268926279 | 7.19763316   | 4.47E-11 | 1.80E-09 | 14.7361634  |
| LCP1      | 0.949940673  | 9.478132629 | 7.19660901   | 4.49E-11 | 1.81E-09 | 14.73092192 |
| SIGLEC14  | 1.590328383  | 4.806286001 | 7.195068802  | 4.53E-11 | 1.82E-09 | 14.72303991 |
| CEBPD     | 1.698692356  | 5.724702761 | 7.192317993  | 4.60E-11 | 1.84E-09 | 14.70896441 |
| ZNF431    | -0.679857183 | 4.22101982  | -7.18996187  | 4.65E-11 | 1.86E-09 | 14.69691027 |
| C16orf96  | -0.770336917 | 1.434893467 | -7.182514557 | 4.84E-11 | 1.93E-09 | 14.65882011 |
| CREB3L4   | -0.711456963 | 4.482782426 | -7.177652397 | 4.96E-11 | 1.97E-09 | 14.63396101 |
| SLC1A3    | 1.382766734  | 2.854774884 | 7.176739143  | 4.99E-11 | 1.98E-09 | 14.62929255 |
| RAB11FIP1 | 1.000676359  | 5.584896219 | 7.176068107  | 5.00E-11 | 1.98E-09 | 14.62586245 |
| RCBTB2    | 1.068172938  | 4.419327273 | 7.171396226  | 5.13E-11 | 2.03E-09 | 14.60198516 |
| TEDC1     | 0.922514496  | 2.788610537 | 7.17048752   | 5.15E-11 | 2.03E-09 | 14.59734166 |
| ANKRD33B  | -1.266281076 | 3.003574041 | -7.161754925 | 5.39E-11 | 2.12E-09 | 14.55273075 |
| SMC04     | 1.301471992  | 4.116323225 | 7.113312585  | 6.94E-11 | 2.72E-09 | 14.30568232 |
| GLT1D1    | 1.630661148  | 1.684444456 | 7.110983426  | 7.03E-11 | 2.75E-09 | 14.29382211 |
| NUAK2     | 1.14676389   | 2.625451277 | 7.103853768  | 7.29E-11 | 2.85E-09 | 14.25752788 |
| FAM227A   | -0.689080677 | 0.994665353 | -7.100630321 | 7.41E-11 | 2.89E-09 | 14.24112376 |
| SIGLEC10  | 1.304255249  | 4.240194862 | 7.100246402  | 7.43E-11 | 2.89E-09 | 14.2391702  |
| UPP1      | 1.491507104  | 3.457215536 | 7.099497834  | 7.46E-11 | 2.90E-09 | 14.2353613  |
| OCEL1     | 0.675889038  | 3.63978286  | 7.09905068   | 7.48E-11 | 2.90E-09 | 14.23308614 |
| MICAL2    | 1.255586784  | 3.008725041 | 7.096255921  | 7.59E-11 | 2.93E-09 | 14.21886758 |
| PLB1      | 1.069832562  | 3.438253841 | 7.093611826  | 7.69E-11 | 2.97E-09 | 14.20541778 |
| HIP1R     | -1.06140055  | 3.042560501 | -7.089942933 | 7.84E-11 | 3.02E-09 | 14.18675869 |
| ST14      | 1.800026358  | 2.721226034 | 7.080444298  | 8.23E-11 | 3.16E-09 | 14.13847042 |
| CBX2      | -1.605884087 | 3.960311897 | -7.069928443 | 8.70E-11 | 3.33E-09 | 14.08504372 |
| HDAC9     | 1.373995256  | 2.755337467 | 7.068809864  | 8.75E-11 | 3.34E-09 | 14.07936272 |
| KCNMB1    | 1.226516324  | 2.092498651 | 7.064093002  | 8.97E-11 | 3.42E-09 | 14.05541119 |
| RGS9BP    | -0.840240433 | 0.854319345 | -7.038331274 | 1.02E-10 | 3.90E-09 | 13.92472036 |
| EGR2      | 1.760052553  | 2.422666244 | 7.037597053  | 1.03E-10 | 3.91E-09 | 13.92099868 |
| CYTIP     | 1.127294538  | 5.522631923 | 7.035113614  | 1.04E-10 | 3.95E-09 | 13.90841169 |
| SQOR      | 0.888921972  | 4.744048682 | 7.031000096  | 1.06E-10 | 4.03E-09 | 13.88756715 |
| TMEM167A  | 0.741842784  | 5.774934442 | 7.030771461  | 1.07E-10 | 4.03E-09 | 13.88640874 |
| VSIG2     | 1.521553037  | 2.999690491 | 7.003206454  | 1.23E-10 | 4.63E-09 | 13.7468687  |
| ZNF439    | -1.01584655  | 4.635037369 | -7.001706116 | 1.24E-10 | 4.65E-09 | 13.73928062 |
| PECAM1    | 1.396086782  | 6.525270106 | 6.992746855  | 1.30E-10 | 4.86E-09 | 13.6939835  |
| CLEC12A   | 1.276521416  | 6.355024102 | 6.966129834  | 1.49E-10 | 5.56E-09 | 13.55956299 |
| SGTB      | 0.786692931  | 3.181079758 | 6.95918162   | 1.54E-10 | 5.75E-09 | 13.52451105 |
| AANAT     | 0.882374751  | 1.678927891 | 6.954434566  | 1.58E-10 | 5.88E-09 | 13.50057241 |
| CRYBG1    | 0.999187684  | 5.507423869 | 6.950693576  | 1.61E-10 | 5.96E-09 | 13.48171236 |
| GKAP1     | -0.73519332  | 2.962791204 | -6.943355406 | 1.67E-10 | 6.18E-09 | 13.44473053 |
| CHP1      | 0.620297484  | 6.29288143  | 6.941761595  | 1.69E-10 | 6.22E-09 | 13.4367006  |
| SNX21     | 0.62494766   | 2.486741328 | 6.915106721  | 1.94E-10 | 7.11E-09 | 13.30253162 |
| MYL12A    | 0.617413402  | 7.208842864 | 6.911979373  | 1.97E-10 | 7.21E-09 | 13.28680523 |
| SOX12     | -0.930089704 | 5.050093335 | -6.900789923 | 2.08E-10 | 7.63E-09 | 13.23056373 |
| SNX30     | 0.770095147  | 3.909478506 | 6.894662567  | 2.15E-10 | 7.84E-09 | 13.19978339 |
| HLX       | 1.177603616  | 3.726118575 | 6.891544065  | 2.19E-10 | 7.95E-09 | 13.1841226  |
| MEX3B     | -1.422496409 | 3.932182179 | -6.878630181 | 2.34E-10 | 8.48E-09 | 13.1193049  |

|           |              |             |              |          |          |             |
|-----------|--------------|-------------|--------------|----------|----------|-------------|
| PELI1     | 1.301609062  | 4.575684199 | 6.878118357  | 2.34E-10 | 8.49E-09 | 13.11673709 |
| VSIG4     | 2.151471314  | 3.359857215 | 6.876988992  | 2.36E-10 | 8.52E-09 | 13.11107139 |
| APOBEC3A  | 2.025986904  | 3.09209265  | 6.875700043  | 2.37E-10 | 8.56E-09 | 13.10460562 |
| ITPK1     | 0.713586569  | 4.934491374 | 6.873242749  | 2.40E-10 | 8.65E-09 | 13.09228062 |
| S1PR3     | 1.376616817  | 1.708505766 | 6.872211128  | 2.41E-10 | 8.68E-09 | 13.08710694 |
| AEBP1     | -1.513094604 | 3.86911051  | -6.859533032 | 2.58E-10 | 9.23E-09 | 13.02355415 |
| TK2       | 0.725920629  | 3.576658187 | 6.847383672  | 2.74E-10 | 9.81E-09 | 12.96270248 |
| CD1C      | 1.990448489  | 2.358355123 | 6.8456561    | 2.77E-10 | 9.88E-09 | 12.95405375 |
| NIBAN2    | 1.659718985  | 3.846634564 | 6.844431807  | 2.78E-10 | 9.92E-09 | 12.94792519 |
| HPSE      | 1.449006737  | 2.930659831 | 6.844157929  | 2.79E-10 | 9.92E-09 | 12.94655428 |
| HERPUD1   | 0.837144338  | 5.507596729 | 6.837858179  | 2.88E-10 | 1.02E-08 | 12.91502762 |
| TDRD7     | 0.916275593  | 4.279783036 | 6.835556363  | 2.91E-10 | 1.03E-08 | 12.90351169 |
| ZCCHC18   | -0.792556837 | 1.172526374 | -6.824024767 | 3.09E-10 | 1.09E-08 | 12.84584643 |
| CASP6     | -0.719648908 | 5.213041028 | -6.820550632 | 3.15E-10 | 1.11E-08 | 12.82848242 |
| ARHGAP27  | 0.854159157  | 5.095147166 | 6.816045544  | 3.22E-10 | 1.13E-08 | 12.80597174 |
| ZNF749    | -0.759057001 | 3.218541898 | -6.81580669  | 3.22E-10 | 1.13E-08 | 12.80477844 |
| CD1E      | 1.452860223  | 1.004033052 | 6.815170459  | 3.23E-10 | 1.13E-08 | 12.80159998 |
| RRAS      | 1.240502862  | 4.442522319 | 6.812604863  | 3.28E-10 | 1.15E-08 | 12.78878426 |
| SLC24A4   | 1.536612642  | 2.665330398 | 6.811560131  | 3.29E-10 | 1.15E-08 | 12.78356624 |
| FTH1      | 0.959376155  | 7.943376372 | 6.80701812   | 3.37E-10 | 1.17E-08 | 12.76088502 |
| SLA       | 1.198324974  | 5.03414878  | 6.800149188  | 3.49E-10 | 1.21E-08 | 12.72659738 |
| ZNF70     | -0.844179388 | 4.464593005 | -6.798005819 | 3.53E-10 | 1.22E-08 | 12.71590163 |
| NUDT16    | 0.94448046   | 4.155256848 | 6.792899252  | 3.62E-10 | 1.25E-08 | 12.69042541 |
| TBC1D32   | -0.673723245 | 2.728638095 | -6.792191285 | 3.64E-10 | 1.25E-08 | 12.68689414 |
| ZNF493    | -0.825889284 | 3.681322645 | -6.792066377 | 3.64E-10 | 1.25E-08 | 12.68627112 |
| SH3BGRL3  | 0.944094318  | 8.963439244 | 6.787234223  | 3.73E-10 | 1.28E-08 | 12.66217356 |
| EGFL8     | -0.641106926 | 2.447257518 | -6.786661191 | 3.74E-10 | 1.28E-08 | 12.65931643 |
| RIPOR2    | 1.060739258  | 6.114790125 | 6.781699346  | 3.84E-10 | 1.31E-08 | 12.63458145 |
| RAB29     | 0.909208814  | 4.251233131 | 6.781327121  | 3.84E-10 | 1.31E-08 | 12.63272624 |
| ADAM9     | 1.196253707  | 3.621388102 | 6.775938165  | 3.95E-10 | 1.35E-08 | 12.60587239 |
| VASP      | 0.733312051  | 6.474371156 | 6.772202385  | 4.03E-10 | 1.37E-08 | 12.58726242 |
| SH3TC1    | 1.352681359  | 3.768880312 | 6.771400188  | 4.04E-10 | 1.38E-08 | 12.58326687 |
| PGAM1     | 0.70581659   | 5.341474244 | 6.768824856  | 4.10E-10 | 1.39E-08 | 12.57044125 |
| RNF13     | 0.638920545  | 5.284437    | 6.767324124  | 4.13E-10 | 1.40E-08 | 12.5629684  |
| IL10      | 1.23932047   | 1.073275893 | 6.759882119  | 4.29E-10 | 1.45E-08 | 12.52592265 |
| IMPDH1    | 0.793595113  | 6.141065089 | 6.756050116  | 4.37E-10 | 1.48E-08 | 12.50685472 |
| TARBP1    | -0.813034353 | 6.217062419 | -6.751177949 | 4.48E-10 | 1.51E-08 | 12.48261834 |
| ZNF134    | -0.62138572  | 4.132876927 | -6.750256391 | 4.50E-10 | 1.51E-08 | 12.47803502 |
| CCDC171   | -0.826330499 | 2.031705122 | -6.74843364  | 4.55E-10 | 1.52E-08 | 12.46897053 |
| NT5M      | -0.949029336 | 4.115793437 | -6.745773108 | 4.61E-10 | 1.54E-08 | 12.45574187 |
| TCIRG1    | 1.210280382  | 6.746062304 | 6.743270751  | 4.67E-10 | 1.56E-08 | 12.44330193 |
| TNFRSF11A | 1.020609541  | 1.094071037 | 6.738589719  | 4.78E-10 | 1.59E-08 | 12.42003704 |
| TARSL2    | -0.640049885 | 3.709314692 | -6.738414915 | 4.78E-10 | 1.59E-08 | 12.41916841 |
| CLCN5     | 1.080682522  | 2.431983634 | 6.737764695  | 4.80E-10 | 1.59E-08 | 12.41593744 |
| TNFAIP8L2 | 0.855007713  | 5.842560513 | 6.734888016  | 4.87E-10 | 1.61E-08 | 12.40164487 |
| ZNF280B   | -0.636876223 | 2.073650487 | -6.731588258 | 4.95E-10 | 1.64E-08 | 12.38525384 |
| RTL10     | -0.598611293 | 4.268597529 | -6.722184124 | 5.20E-10 | 1.71E-08 | 12.33856121 |

|          |              |             |              |          |          |             |
|----------|--------------|-------------|--------------|----------|----------|-------------|
| ANG      | 0.780510026  | 1.097202738 | 6.719956924  | 5.26E-10 | 1.73E-08 | 12.32750745 |
| IL27     | 0.688727693  | 1.139291197 | 6.715690763  | 5.37E-10 | 1.77E-08 | 12.30633905 |
| SAMD4A   | 0.786592506  | 0.79867859  | 6.706437211  | 5.63E-10 | 1.85E-08 | 12.26044558 |
| LYN      | 0.875550782  | 6.598695186 | 6.694937617  | 5.97E-10 | 1.95E-08 | 12.20345492 |
| GNAI2    | 0.650911601  | 7.849138032 | 6.694762238  | 5.97E-10 | 1.95E-08 | 12.20258613 |
| NOTCH2   | 1.083386756  | 5.69612951  | 6.687313391  | 6.20E-10 | 2.02E-08 | 12.16569597 |
| CSTA     | 2.038243828  | 5.372707026 | 6.685144595  | 6.27E-10 | 2.04E-08 | 12.15495879 |
| MSI2     | -1.326151042 | 4.894079552 | -6.685053552 | 6.27E-10 | 2.04E-08 | 12.15450809 |
| C1QTNF3  | -0.641365635 | 3.164871215 | -6.684494563 | 6.29E-10 | 2.04E-08 | 12.15174097 |
| TRIB1    | 1.35380979   | 5.715973837 | 6.682628769  | 6.35E-10 | 2.06E-08 | 12.14250564 |
| PPARD    | 1.005736169  | 3.356654163 | 6.680689217  | 6.41E-10 | 2.07E-08 | 12.13290654 |
| FAM151B  | 0.995572315  | 2.210438702 | 6.677744861  | 6.51E-10 | 2.10E-08 | 12.1183371  |
| VN1R1    | -0.809163888 | 2.742939661 | -6.668041188 | 6.84E-10 | 2.20E-08 | 12.07034267 |
| ZNF114   | -0.796300194 | 1.615716629 | -6.665650599 | 6.92E-10 | 2.22E-08 | 12.05852397 |
| SH3BP2   | 0.931056108  | 5.368334244 | 6.662382863  | 7.04E-10 | 2.26E-08 | 12.0423721  |
| NPL      | 1.471333293  | 3.043714223 | 6.661705342  | 7.06E-10 | 2.26E-08 | 12.03902371 |
| EBPL     | -0.702473989 | 5.968493281 | -6.661137384 | 7.08E-10 | 2.26E-08 | 12.03621691 |
| CCDC138  | -0.646327177 | 2.993252468 | -6.651474144 | 7.44E-10 | 2.37E-08 | 11.98847985 |
| CPVL     | 1.957018341  | 4.473917581 | 6.65011575   | 7.49E-10 | 2.39E-08 | 11.98177198 |
| AKAP13   | 0.704508949  | 5.7125159   | 6.648981765  | 7.53E-10 | 2.40E-08 | 11.97617277 |
| LIPA     | 0.875886715  | 5.767390783 | 6.647162115  | 7.60E-10 | 2.41E-08 | 11.96718896 |
| PLXNB2   | 1.077577865  | 6.963815539 | 6.646300968  | 7.64E-10 | 2.42E-08 | 11.9629378  |
| KDM7A    | 1.129505633  | 3.878429953 | 6.645734475  | 7.66E-10 | 2.42E-08 | 11.96014138 |
| FXVD6    | 1.42799273   | 1.768818323 | 6.643932992  | 7.73E-10 | 2.44E-08 | 11.95124936 |
| ATP6V1B2 | 0.766320356  | 6.083095861 | 6.642516296  | 7.78E-10 | 2.45E-08 | 11.94425745 |
| TLR2     | 1.420503934  | 6.243757747 | 6.641846446  | 7.81E-10 | 2.46E-08 | 11.94095175 |
| ENHO     | 0.967804295  | 0.641646404 | 6.639427801  | 7.91E-10 | 2.49E-08 | 11.92901711 |
| SHKBP1   | 0.753135224  | 6.58080839  | 6.629355168  | 8.32E-10 | 2.61E-08 | 11.87933712 |
| TMCC3    | 0.889761142  | 1.22545433  | 6.627324446  | 8.40E-10 | 2.63E-08 | 11.86932569 |
| QPCT     | 1.654711164  | 2.227826729 | 6.625875505  | 8.47E-10 | 2.65E-08 | 11.86218334 |
| RNF166   | 0.793200038  | 5.704947975 | 6.621577879  | 8.65E-10 | 2.70E-08 | 11.84100329 |
| CASP5    | 1.06349305   | 0.987997287 | 6.617524966  | 8.83E-10 | 2.75E-08 | 11.82103539 |
| ZNF222   | -0.603903911 | 2.503171466 | -6.614357579 | 8.97E-10 | 2.78E-08 | 11.80543446 |
| APOBR    | 1.1485393    | 5.659912954 | 6.610859394  | 9.13E-10 | 2.83E-08 | 11.78820843 |
| SLC16A6  | 1.02970139   | 1.403485118 | 6.602149718  | 9.54E-10 | 2.95E-08 | 11.74533895 |
| MILR1    | 1.128528442  | 5.375234278 | 6.601939983  | 9.55E-10 | 2.95E-08 | 11.74430696 |
| DESI1    | 0.658803189  | 4.496755104 | 6.598442003  | 9.72E-10 | 2.99E-08 | 11.72709778 |
| CD300LF  | 1.208724606  | 5.758063142 | 6.597013493  | 9.79E-10 | 3.01E-08 | 11.72007116 |
| OGFR     | 0.675681602  | 5.214758512 | 6.592866304  | 1.00E-09 | 3.06E-08 | 11.69967599 |
| TNFSF13B | 1.039395297  | 6.455485449 | 6.58435156   | 1.04E-09 | 3.19E-08 | 11.65782169 |
| ZNF84    | -0.751828594 | 4.144247408 | -6.579228183 | 1.07E-09 | 3.27E-08 | 11.6326505  |
| CDADC1   | -0.646798022 | 4.085404162 | -6.575048298 | 1.09E-09 | 3.33E-08 | 11.61212185 |
| POR      | 0.767649482  | 3.976913168 | 6.570106085  | 1.12E-09 | 3.41E-08 | 11.58785747 |
| HLA-DRB1 | 1.840421453  | 8.392535262 | 6.56902553   | 1.13E-09 | 3.42E-08 | 11.58255356 |
| ZSCAN31  | -0.826042855 | 2.681562919 | -6.564435181 | 1.15E-09 | 3.50E-08 | 11.5600266  |
| PLA2G12A | -0.655746836 | 3.868826904 | -6.556695248 | 1.20E-09 | 3.62E-08 | 11.52206082 |
| ZNF382   | -0.83756045  | 2.408869137 | -6.556430766 | 1.20E-09 | 3.62E-08 | 11.52076388 |

|            |              |             |              |          |          |             |
|------------|--------------|-------------|--------------|----------|----------|-------------|
| SCGB1A1    | 0.811440529  | 0.779970444 | 6.546704488  | 1.26E-09 | 3.79E-08 | 11.47308713 |
| TNFSF12    | 1.371107951  | 3.125894119 | 6.54007773   | 1.30E-09 | 3.92E-08 | 11.44062388 |
| RP2        | 0.695528844  | 5.46664387  | 6.53975545   | 1.31E-09 | 3.92E-08 | 11.43904551 |
| MAST3      | 0.809770644  | 4.944478148 | 6.539092534  | 1.31E-09 | 3.92E-08 | 11.43579899 |
| STAC3      | 0.898308772  | 4.699850086 | 6.53393416   | 1.35E-09 | 4.02E-08 | 11.41054228 |
| FFAR4      | 0.647965919  | 0.537889487 | 6.529483939  | 1.38E-09 | 4.11E-08 | 11.38876085 |
| MRVI1      | 0.878542672  | 1.621305751 | 6.52614246   | 1.40E-09 | 4.17E-08 | 11.37241097 |
| TRIM38     | 0.613569932  | 5.755880372 | 6.512175919  | 1.50E-09 | 4.46E-08 | 11.30411783 |
| TIFAB      | 1.624715891  | 1.906984931 | 6.509898889  | 1.52E-09 | 4.50E-08 | 11.29299062 |
| NUCB2      | -0.911048583 | 6.633682321 | -6.497129422 | 1.62E-09 | 4.78E-08 | 11.23062592 |
| FPR2       | 1.722116895  | 2.345868024 | 6.495348492  | 1.63E-09 | 4.81E-08 | 11.22193293 |
| JAZF1      | 1.104569105  | 3.56795389  | 6.495267208  | 1.63E-09 | 4.81E-08 | 11.2215362  |
| SMIM17     | -0.631364547 | 1.230758383 | -6.491789388 | 1.66E-09 | 4.88E-08 | 11.20456399 |
| KLHL23     | -1.05787876  | 3.347207636 | -6.488908951 | 1.69E-09 | 4.95E-08 | 11.19051055 |
| PGBD1      | -0.811076352 | 3.118669066 | -6.478991223 | 1.77E-09 | 5.18E-08 | 11.1421467  |
| TP53BP1    | -0.68370059  | 4.420865244 | -6.478072548 | 1.78E-09 | 5.20E-08 | 11.13766866 |
| MOB3B      | 1.031557311  | 2.714334801 | 6.477506389  | 1.78E-09 | 5.21E-08 | 11.1349091  |
| DPYSL2     | 1.624673101  | 4.533313298 | 6.476758408  | 1.79E-09 | 5.22E-08 | 11.13126351 |
| MATK       | -0.941572675 | 4.282970203 | -6.474050032 | 1.82E-09 | 5.28E-08 | 11.11806487 |
| PLEC       | 1.274180311  | 5.86894994  | 6.472711808  | 1.83E-09 | 5.30E-08 | 11.11154438 |
| OASL       | 1.098437955  | 1.806095849 | 6.472614573  | 1.83E-09 | 5.30E-08 | 11.11107063 |
| ZNF610     | -0.91644196  | 2.332072247 | -6.470995197 | 1.84E-09 | 5.34E-08 | 11.1031812  |
| TTC8       | -0.824922472 | 2.402473251 | -6.463185221 | 1.92E-09 | 5.53E-08 | 11.06514581 |
| TM7SF3     | -0.900287447 | 7.259520097 | -6.459563204 | 1.95E-09 | 5.62E-08 | 11.0475141  |
| IQSEC1     | 1.077644726  | 5.009006179 | 6.458024079  | 1.97E-09 | 5.65E-08 | 11.04002327 |
| PMM1       | 0.794567508  | 2.032967349 | 6.451554646  | 2.03E-09 | 5.82E-08 | 11.00854681 |
| SYT17      | 0.86835364   | 0.786717116 | 6.446131891  | 2.09E-09 | 5.97E-08 | 10.98217521 |
| TEC        | -0.875211091 | 5.699855455 | -6.443768692 | 2.11E-09 | 6.03E-08 | 10.97068617 |
| NHS        | 0.627099115  | 0.676771251 | 6.440253803  | 2.15E-09 | 6.13E-08 | 10.95360199 |
| CAST       | 1.050792934  | 4.950903746 | 6.43979908   | 2.15E-09 | 6.14E-08 | 10.95139214 |
| MRC2       | -1.754902314 | 3.620030146 | -6.437555993 | 2.18E-09 | 6.20E-08 | 10.94049245 |
| IL6R       | 0.873045362  | 6.1449863   | 6.436000007  | 2.20E-09 | 6.23E-08 | 10.93293267 |
| ATP2C1     | -0.593204093 | 5.711109494 | -6.43580775  | 2.20E-09 | 6.23E-08 | 10.93199865 |
| RXRA       | 1.229171336  | 4.117097117 | 6.435656241  | 2.20E-09 | 6.23E-08 | 10.93126261 |
| ITPRIP     | 0.796175864  | 4.467103504 | 6.435058301  | 2.21E-09 | 6.23E-08 | 10.92835783 |
| C5AR2      | 1.100314671  | 1.765420941 | 6.434979301  | 2.21E-09 | 6.23E-08 | 10.92797407 |
| AIF1       | 0.961401642  | 7.835952418 | 6.429698365  | 2.27E-09 | 6.39E-08 | 10.9023256  |
| SLC49A3    | 1.085991225  | 2.871521809 | 6.428455883  | 2.28E-09 | 6.42E-08 | 10.89629267 |
| RASSF5     | 0.695711571  | 5.323003895 | 6.427084449  | 2.29E-09 | 6.45E-08 | 10.8896343  |
| ACOT9      | 0.761209557  | 4.231825351 | 6.412373655  | 2.47E-09 | 6.90E-08 | 10.81825838 |
| PLPPR2     | 0.937138845  | 4.71332495  | 6.410153874  | 2.50E-09 | 6.97E-08 | 10.8074954  |
| ZNF85      | -0.785399762 | 3.443608212 | -6.406767413 | 2.54E-09 | 7.08E-08 | 10.79107925 |
| CAMSAP2    | 0.682520989  | 1.048112294 | 6.403019089  | 2.59E-09 | 7.20E-08 | 10.77291413 |
| RARA       | 0.87664126   | 5.016438459 | 6.401838856  | 2.60E-09 | 7.23E-08 | 10.76719561 |
| TBC1D8     | 1.027156501  | 3.871018173 | 6.397966046  | 2.65E-09 | 7.35E-08 | 10.7484347  |
| ZNF559-ZNF | -0.609971393 | 1.462369953 | -6.39523965  | 2.69E-09 | 7.44E-08 | 10.73523082 |
| OR2B11     | 0.744074381  | 1.080094146 | 6.390946897  | 2.75E-09 | 7.58E-08 | 10.71444697 |

|            |              |             |              |          |          |             |
|------------|--------------|-------------|--------------|----------|----------|-------------|
| CES1       | 2.244667697  | 1.904643207 | 6.387020217  | 2.80E-09 | 7.71E-08 | 10.69544179 |
| HPS4       | -0.721351284 | 5.051665412 | -6.382639428 | 2.86E-09 | 7.87E-08 | 10.67424581 |
| FOLR2      | 1.226495839  | 1.528494562 | 6.37884697   | 2.92E-09 | 8.01E-08 | 10.65590247 |
| CRIP1      | 1.136610443  | 2.768382449 | 6.374318096  | 2.98E-09 | 8.18E-08 | 10.6340046  |
| ZNF486     | -0.999009935 | 3.126163436 | -6.362071533 | 3.17E-09 | 8.66E-08 | 10.57483065 |
| BEST1      | 0.850191289  | 2.276921244 | 6.358309081  | 3.23E-09 | 8.80E-08 | 10.55666275 |
| CTSD       | 1.194675807  | 8.014973105 | 6.357292214  | 3.25E-09 | 8.83E-08 | 10.55175352 |
| OSTM1      | 0.653658101  | 4.207079086 | 6.35674181   | 3.25E-09 | 8.85E-08 | 10.54909645 |
| MCMBP      | 0.610459102  | 5.455970868 | 6.348858003  | 3.38E-09 | 9.17E-08 | 10.51105054 |
| ZCCHC24    | 1.015822329  | 2.596728912 | 6.340211177  | 3.53E-09 | 9.56E-08 | 10.46935062 |
| ZNRF1      | -0.809544358 | 4.537789952 | -6.338245631 | 3.57E-09 | 9.64E-08 | 10.45987577 |
| SAT1       | 1.222018083  | 7.790548298 | 6.337910597  | 3.57E-09 | 9.64E-08 | 10.45826089 |
| ZNF738     | -0.630377011 | 3.62665185  | -6.33725202  | 3.58E-09 | 9.66E-08 | 10.45508667 |
| AC093323.1 | -0.598879815 | 4.187770586 | -6.325177111 | 3.81E-09 | 1.02E-07 | 10.39691827 |
| PRSS57     | -1.72671553  | 8.24163735  | -6.32394466  | 3.83E-09 | 1.02E-07 | 10.39098444 |
| QSOX2      | -0.693243589 | 4.960639311 | -6.321202328 | 3.88E-09 | 1.04E-07 | 10.37778323 |
| SIDT2      | 0.839346876  | 4.685085183 | 6.319236663  | 3.92E-09 | 1.04E-07 | 10.36832263 |
| IGF2R      | 1.486142463  | 3.903582084 | 6.318883574  | 3.93E-09 | 1.04E-07 | 10.36662339 |
| SRD5A1     | 0.7619128    | 2.3576173   | 6.318559418  | 3.93E-09 | 1.05E-07 | 10.36506345 |
| ZBTB12     | -0.598059653 | 3.540669385 | -6.317986076 | 3.94E-09 | 1.05E-07 | 10.36230444 |
| Clorf127   | 0.903250872  | 1.293468037 | 6.317641599  | 3.95E-09 | 1.05E-07 | 10.36064683 |
| KCNH3      | 0.842936107  | 1.615784539 | 6.314804395  | 4.01E-09 | 1.06E-07 | 10.34699608 |
| RASGRP4    | 1.248557341  | 5.714455948 | 6.31284709   | 4.04E-09 | 1.07E-07 | 10.33758069 |
| SLC35F6    | 0.744345123  | 4.484837117 | 6.310582652  | 4.09E-09 | 1.08E-07 | 10.32668979 |
| TMEM150B   | 1.511212877  | 3.217428568 | 6.303880255  | 4.23E-09 | 1.11E-07 | 10.29446634 |
| COQ10A     | -0.592101824 | 3.422443121 | -6.300951077 | 4.29E-09 | 1.13E-07 | 10.28038923 |
| FOSL2      | 0.983470092  | 6.887586668 | 6.29593969   | 4.40E-09 | 1.16E-07 | 10.25631335 |
| WRN        | -0.660728686 | 4.645307106 | -6.295389839 | 4.41E-09 | 1.16E-07 | 10.25367234 |
| WNT5B      | 0.641386669  | 0.867034989 | 6.295102883  | 4.41E-09 | 1.16E-07 | 10.25229411 |
| FTL        | 0.799611033  | 11.45654338 | 6.292038921  | 4.48E-09 | 1.17E-07 | 10.2375801  |
| PLD3       | 1.008043205  | 6.092690116 | 6.290648638  | 4.51E-09 | 1.18E-07 | 10.23090481 |
| BCR        | -0.85665789  | 5.344748003 | -6.289297217 | 4.54E-09 | 1.19E-07 | 10.22441686 |
| MALT1      | 0.653492109  | 3.635856619 | 6.288854909  | 4.55E-09 | 1.19E-07 | 10.22229357 |
| STAT6      | 0.59719232   | 7.244053141 | 6.28252146   | 4.70E-09 | 1.22E-07 | 10.19189861 |
| CR1        | 1.681204477  | 2.757106434 | 6.280589218  | 4.74E-09 | 1.23E-07 | 10.18262877 |
| ZNF106     | 0.698395579  | 5.4041042   | 6.279805039  | 4.76E-09 | 1.24E-07 | 10.17886713 |
| SMPDL3A    | 1.422273106  | 1.446687814 | 6.277647544  | 4.81E-09 | 1.25E-07 | 10.16851911 |
| FUCA1      | 0.887005431  | 4.563612851 | 6.274102605  | 4.90E-09 | 1.27E-07 | 10.15152053 |
| CDC42BPG   | -0.775879606 | 2.090279903 | -6.270018772 | 5.00E-09 | 1.29E-07 | 10.13194416 |
| HFE        | 0.735857693  | 0.972314187 | 6.258554638  | 5.28E-09 | 1.36E-07 | 10.0770254  |
| ZNF74      | -0.670704703 | 3.76921638  | -6.253445384 | 5.42E-09 | 1.39E-07 | 10.05256674 |
| PPP1R9B    | 0.595355993  | 6.907087375 | 6.251479494  | 5.47E-09 | 1.40E-07 | 10.04315859 |
| AGFG1      | 0.610233306  | 5.424966404 | 6.249811251  | 5.52E-09 | 1.41E-07 | 10.03517612 |
| CKAP4      | 1.560412495  | 3.842491992 | 6.239019199  | 5.82E-09 | 1.49E-07 | 9.983563973 |
| HLA-DRA    | 1.795166474  | 10.15012988 | 6.220355568  | 6.38E-09 | 1.63E-07 | 9.894418719 |
| BLOC1S1    | 0.643687808  | 4.883621373 | 6.215594492  | 6.53E-09 | 1.66E-07 | 9.871700664 |
| GLIPR1     | 0.954593777  | 6.364975625 | 6.21463344   | 6.56E-09 | 1.67E-07 | 9.867116012 |

|          |               |              |               |           |           |              |
|----------|---------------|--------------|---------------|-----------|-----------|--------------|
| SELPLG   | 1. 008937055  | 7. 445011457 | 6. 207116843  | 6. 80E-09 | 1. 73E-07 | 9. 831271564 |
| GAS7     | 1. 198162234  | 5. 46310221  | 6. 206839988  | 6. 81E-09 | 1. 73E-07 | 9. 829951765 |
| CALHM2   | 0. 991744257  | 4. 511265773 | 6. 200527692  | 7. 03E-09 | 1. 78E-07 | 9. 799868942 |
| ARHGAP31 | 1. 125971758  | 2. 588767677 | 6. 200055674  | 7. 04E-09 | 1. 78E-07 | 9. 797620086 |
| DYTN     | -1. 324971163 | 2. 507354925 | -6. 197071646 | 7. 15E-09 | 1. 81E-07 | 9. 783405248 |
| GSR      | 0. 604835235  | 5. 830020636 | 6. 196604439  | 7. 16E-09 | 1. 81E-07 | 9. 781179979 |
| PPFIBP2  | 0. 928983059  | 1. 726621015 | 6. 196085902  | 7. 18E-09 | 1. 81E-07 | 9. 778710328 |
| PRDM11   | -0. 682049325 | 2. 987104248 | -6. 191059143 | 7. 36E-09 | 1. 85E-07 | 9. 754775016 |
| SLC39A3  | -0. 781624606 | 4. 899989664 | -6. 190683563 | 7. 37E-09 | 1. 85E-07 | 9. 75298708  |
| SLC03A1  | 0. 699496671  | 4. 080369001 | 6. 186615198  | 7. 52E-09 | 1. 89E-07 | 9. 733623514 |
| ABCD1    | 0. 811162806  | 4. 409227841 | 6. 180977563  | 7. 73E-09 | 1. 94E-07 | 9. 706802261 |
| GNB2     | 0. 668157297  | 6. 805626854 | 6. 177408319  | 7. 87E-09 | 1. 97E-07 | 9. 689828264 |
| IFT22    | -0. 607096029 | 2. 105950461 | -6. 175979295 | 7. 92E-09 | 1. 98E-07 | 9. 683033834 |
| TNFSF8   | 1. 18445916   | 3. 753683616 | 6. 170729661  | 8. 13E-09 | 2. 03E-07 | 9. 658081247 |
| TRAF3IP2 | -0. 612538096 | 4. 153976412 | -6. 170286344 | 8. 15E-09 | 2. 03E-07 | 9. 655974594 |
| WDR31    | -0. 685190513 | 2. 405144535 | -6. 167149792 | 8. 27E-09 | 2. 06E-07 | 9. 641071965 |
| SHF      | -0. 859711531 | 2. 354750277 | -6. 16004936  | 8. 56E-09 | 2. 13E-07 | 9. 607350971 |
| ZNF107   | -0. 95423243  | 4. 725086367 | -6. 157783003 | 8. 66E-09 | 2. 15E-07 | 9. 596592133 |
| NEDD9    | 0. 858551791  | 3. 128009152 | 6. 157100317  | 8. 69E-09 | 2. 15E-07 | 9. 593351709 |
| DOK4     | -1. 008985436 | 2. 100129598 | -6. 155202497 | 8. 77E-09 | 2. 17E-07 | 9. 584344577 |
| TEX30    | -0. 763436581 | 4. 471910262 | -6. 152595923 | 8. 88E-09 | 2. 20E-07 | 9. 571976125 |
| PADI2    | 1. 575029969  | 2. 976435652 | 6. 151505851  | 8. 93E-09 | 2. 20E-07 | 9. 566804463 |
| ANO6     | 0. 724510087  | 5. 154085785 | 6. 14928016   | 9. 02E-09 | 2. 23E-07 | 9. 556246598 |
| TMEM220  | -0. 662101488 | 4. 264433752 | -6. 147345192 | 9. 11E-09 | 2. 24E-07 | 9. 5470695   |
| PPM1H    | -1. 093115927 | 3. 284255232 | -6. 145472799 | 9. 19E-09 | 2. 26E-07 | 9. 538190671 |
| CD302    | 0. 88527293   | 5. 153021578 | 6. 139979419  | 9. 44E-09 | 2. 31E-07 | 9. 512149714 |
| RNF175   | 1. 116922291  | 2. 777523816 | 6. 138791896  | 9. 50E-09 | 2. 32E-07 | 9. 506522012 |
| RNPEP    | 0. 631154659  | 5. 97306119  | 6. 133702437  | 9. 74E-09 | 2. 38E-07 | 9. 482409644 |
| EPHB3    | 1. 176696662  | 1. 559184593 | 6. 130032392  | 9. 91E-09 | 2. 41E-07 | 9. 4650288   |
| DNMT3B   | -1. 281158355 | 4. 505694077 | -6. 125869717 | 1. 01E-08 | 2. 46E-07 | 9. 445321781 |
| CAPZA2   | 0. 599394829  | 5. 158923997 | 6. 119816359  | 1. 04E-08 | 2. 53E-07 | 9. 416676876 |
| ARHGAP45 | 0. 860809157  | 6. 827619553 | 6. 119010187  | 1. 05E-08 | 2. 54E-07 | 9. 412863182 |
| NOL4L    | -0. 815023669 | 4. 843784781 | -6. 117202871 | 1. 05E-08 | 2. 56E-07 | 9. 404314447 |
| SDCBP    | 0. 701701104  | 6. 746171862 | 6. 116687072  | 1. 06E-08 | 2. 56E-07 | 9. 401874934 |
| TMEM67   | -0. 794780716 | 2. 174968661 | -6. 113317831 | 1. 08E-08 | 2. 60E-07 | 9. 385942601 |
| MX2      | 1. 039558226  | 3. 61685978  | 6. 111714406  | 1. 08E-08 | 2. 62E-07 | 9. 378362077 |
| CORO1C   | 0. 677966449  | 5. 828314827 | 6. 110391027  | 1. 09E-08 | 2. 63E-07 | 9. 372106342 |
| PNPLA1   | 0. 961053432  | 1. 251526513 | 6. 109076515  | 1. 10E-08 | 2. 64E-07 | 9. 365893256 |
| PDZD7    | 0. 941294206  | 1. 496407969 | 6. 105302941  | 1. 12E-08 | 2. 69E-07 | 9. 348061402 |
| ADAT2    | -0. 625064873 | 4. 158160382 | -6. 103612751 | 1. 13E-08 | 2. 70E-07 | 9. 340076436 |
| CMKLR1   | 1. 20786654   | 1. 841052602 | 6. 102742757  | 1. 13E-08 | 2. 71E-07 | 9. 335966797 |
| P3H4     | -0. 768558986 | 2. 044164965 | -6. 097834547 | 1. 16E-08 | 2. 77E-07 | 9. 312787621 |
| PDE4A    | 1. 236458356  | 2. 198651345 | 6. 094756341  | 1. 18E-08 | 2. 81E-07 | 9. 298255912 |
| PID1     | 1. 098849312  | 1. 097646982 | 6. 09264761   | 1. 19E-08 | 2. 84E-07 | 9. 288303265 |
| YPEL2    | 0. 65360559   | 4. 270941153 | 6. 089293963  | 1. 21E-08 | 2. 88E-07 | 9. 272478835 |
| SLC9A9   | 1. 214891658  | 2. 325691058 | 6. 087952889  | 1. 22E-08 | 2. 90E-07 | 9. 266152217 |
| APLP2    | 0. 883194679  | 8. 197501409 | 6. 087373042  | 1. 22E-08 | 2. 90E-07 | 9. 263416981 |



|          |              |             |              |          |          |             |
|----------|--------------|-------------|--------------|----------|----------|-------------|
| PHOSPHO2 | -0.704669927 | 3.339245817 | -6.086803928 | 1.22E-08 | 2.91E-07 | 9.260732516 |
| TPK1     | 0.70004007   | 2.17795796  | 6.082731477  | 1.25E-08 | 2.96E-07 | 9.241527112 |
| ARHGAP23 | -0.833652555 | 3.912503516 | -6.063746104 | 1.37E-08 | 3.24E-07 | 9.152086817 |
| METRNL   | 1.214026373  | 3.931491566 | 6.063508211  | 1.37E-08 | 3.24E-07 | 9.150967078 |
| TMEM144  | 0.901967835  | 2.130255596 | 6.061093096  | 1.38E-08 | 3.27E-07 | 9.139600755 |
| ZNF660   | -0.793752903 | 3.738619893 | -6.057568325 | 1.41E-08 | 3.33E-07 | 9.123016512 |
| RBP7     | 1.108613896  | 1.493807902 | 6.054624285  | 1.43E-08 | 3.37E-07 | 9.10916873  |
| YPEL1    | -0.742744675 | 3.127185552 | -6.052600082 | 1.44E-08 | 3.40E-07 | 9.099649714 |
| MYB      | -0.707706002 | 7.576041513 | -6.05019808  | 1.46E-08 | 3.43E-07 | 9.08835635  |
| CD1B     | 0.779060387  | 0.41282489  | 6.044433744  | 1.50E-08 | 3.52E-07 | 9.061264603 |
| ZC3HAV1L | -0.865670279 | 4.575340843 | -6.043216632 | 1.51E-08 | 3.54E-07 | 9.055546144 |
| NINJ1    | 1.211601133  | 4.521351628 | 6.042446906  | 1.52E-08 | 3.55E-07 | 9.05193     |
| CYTH4    | 1.348994417  | 5.469444478 | 6.042144549  | 1.52E-08 | 3.55E-07 | 9.050509612 |
| ZNF880   | -0.690763364 | 3.145857649 | -6.030283437 | 1.61E-08 | 3.75E-07 | 8.994820488 |
| KIF1C    | 0.88776036   | 3.084379362 | 6.021496369  | 1.68E-08 | 3.90E-07 | 8.95360356  |
| SNX10    | 1.197312915  | 4.968440172 | 6.01922085   | 1.70E-08 | 3.94E-07 | 8.942935386 |
| TKT      | 0.730256581  | 6.988423029 | 6.011785331  | 1.76E-08 | 4.08E-07 | 8.908091584 |
| ZNF221   | -0.825387388 | 2.857087093 | -6.011585741 | 1.76E-08 | 4.08E-07 | 8.907156613 |
| CRYBG3   | 1.201998033  | 2.563058645 | 6.009916368  | 1.77E-08 | 4.11E-07 | 8.899337162 |
| SLC30A1  | 0.723989788  | 4.008707634 | 5.9952616    | 1.90E-08 | 4.39E-07 | 8.83074542  |
| IPCEF1   | 1.024067377  | 2.515343029 | 5.994563551  | 1.91E-08 | 4.40E-07 | 8.827480534 |
| TMEM44   | -0.721809681 | 3.976651619 | -5.993947717 | 1.91E-08 | 4.41E-07 | 8.82460036  |
| DENND1A  | 0.589325616  | 4.728069909 | 5.991879458  | 1.93E-08 | 4.45E-07 | 8.814928592 |
| CEL      | -0.831882684 | 2.169194817 | -5.991656416 | 1.94E-08 | 4.45E-07 | 8.813885697 |
| SLC16A3  | 0.995249576  | 4.271781795 | 5.98694541   | 1.98E-08 | 4.53E-07 | 8.791863147 |
| RAB3D    | 0.840684558  | 5.737338163 | 5.985230548  | 2.00E-08 | 4.56E-07 | 8.783849089 |
| GLRX     | 0.60553836   | 4.452542989 | 5.983193429  | 2.02E-08 | 4.60E-07 | 8.774330702 |
| ZBTB10   | -0.689546637 | 3.65811377  | -5.979745888 | 2.05E-08 | 4.67E-07 | 8.758226302 |
| EPB41L3  | 1.449903568  | 1.288164705 | 5.979103389  | 2.06E-08 | 4.68E-07 | 8.755225592 |
| ALDH3B1  | 1.013421085  | 5.13310413  | 5.978606583  | 2.06E-08 | 4.68E-07 | 8.752905445 |
| RMDN2    | 0.775645637  | 1.396508695 | 5.973164856  | 2.12E-08 | 4.79E-07 | 8.727499001 |
| TPMT     | 0.586449667  | 4.405723877 | 5.969505825  | 2.15E-08 | 4.86E-07 | 8.71042296  |
| SLC2A6   | 1.232718704  | 3.273328709 | 5.964528711  | 2.21E-08 | 4.97E-07 | 8.687205128 |
| ORMDL3   | -0.617265886 | 4.357926618 | -5.961031517 | 2.24E-08 | 5.05E-07 | 8.67089753  |
| TNNI2    | 1.392379589  | 2.286635468 | 5.959709312  | 2.26E-08 | 5.07E-07 | 8.664733422 |
| NRGN     | 1.712381086  | 5.738642237 | 5.957542728  | 2.28E-08 | 5.12E-07 | 8.654634499 |
| ZNF233   | -0.622333207 | 2.639812913 | -5.95363835  | 2.32E-08 | 5.21E-07 | 8.636440571 |
| LRP5     | -1.116483255 | 4.538757739 | -5.951054623 | 2.35E-08 | 5.27E-07 | 8.62440442  |
| ALS2     | -1.001382484 | 4.445526631 | -5.944313454 | 2.43E-08 | 5.44E-07 | 8.593014963 |
| MAPK7    | 0.826189424  | 3.361176524 | 5.944053563  | 2.43E-08 | 5.44E-07 | 8.591805213 |
| SLC49A4  | 0.729764778  | 3.72477268  | 5.943832811  | 2.44E-08 | 5.44E-07 | 8.590777673 |
| ZNF496   | -0.726964022 | 4.720642108 | -5.942543458 | 2.45E-08 | 5.46E-07 | 8.584776522 |
| SMIM24   | -1.430542882 | 6.145034541 | -5.913185529 | 2.82E-08 | 6.25E-07 | 8.448333245 |
| SLC25A24 | 0.803130683  | 4.40504962  | 5.908121819  | 2.89E-08 | 6.38E-07 | 8.424838129 |
| HLA-DQB1 | 1.87131234   | 5.311025635 | 5.908095365  | 2.89E-08 | 6.38E-07 | 8.424715412 |
| SLC43A1  | -0.672266119 | 5.34114339  | -5.907389348 | 2.90E-08 | 6.40E-07 | 8.421440481 |
| SUCLG2   | 1.269737905  | 3.960445568 | 5.899190003  | 3.02E-08 | 6.64E-07 | 8.383423361 |

|          |              |             |              |          |          |             |
|----------|--------------|-------------|--------------|----------|----------|-------------|
| ZNF467   | 1.237667983  | 4.617135123 | 5.899142736  | 3.02E-08 | 6.64E-07 | 8.383204292 |
| GPSM1    | -1.173299957 | 4.720733457 | -5.898757823 | 3.02E-08 | 6.64E-07 | 8.381420348 |
| APAF1    | 0.706129112  | 5.422319953 | 5.898440111  | 3.03E-08 | 6.65E-07 | 8.379947911 |
| CDKN2D   | 0.897910857  | 4.977938426 | 5.892050318  | 3.12E-08 | 6.85E-07 | 8.350344029 |
| CDKN2B   | 0.95901413   | 1.153040081 | 5.888292519  | 3.18E-08 | 6.96E-07 | 8.332942735 |
| LRP12    | -0.86919956  | 2.314729506 | -5.885865405 | 3.21E-08 | 7.03E-07 | 8.321706842 |
| ZFHx2    | -0.592747092 | 1.602069911 | -5.885456829 | 3.22E-08 | 7.04E-07 | 8.319815673 |
| CSK      | 0.600169748  | 6.565500723 | 5.87461158   | 3.39E-08 | 7.40E-07 | 8.269643945 |
| GRK3     | 0.778231938  | 4.961485295 | 5.871692258  | 3.44E-08 | 7.49E-07 | 8.256147799 |
| AHR      | 1.494710103  | 5.62403484  | 5.870892749  | 3.45E-08 | 7.50E-07 | 8.252452306 |
| MCOLN1   | 0.723518184  | 4.216811789 | 5.865058503  | 3.55E-08 | 7.71E-07 | 8.225494005 |
| RELL2    | 0.972692259  | 2.331983565 | 5.864322172  | 3.56E-08 | 7.72E-07 | 8.222092736 |
| ZNF574   | -0.634645537 | 4.159374256 | -5.860272917 | 3.63E-08 | 7.87E-07 | 8.203392754 |
| RNASE1   | 1.416831718  | 2.32543554  | 5.858820286  | 3.65E-08 | 7.91E-07 | 8.19668613  |
| CYP1B1   | 1.602295823  | 2.426508509 | 5.856732669  | 3.69E-08 | 7.98E-07 | 8.187049524 |
| HOOK3    | 0.619856184  | 4.920527283 | 5.853574616  | 3.75E-08 | 8.09E-07 | 8.172475468 |
| HSPA4L   | -0.900037747 | 1.259430006 | -5.85306937  | 3.76E-08 | 8.09E-07 | 8.170144231 |
| ZNF433   | -0.626387976 | 3.966435672 | -5.85071209  | 3.80E-08 | 8.18E-07 | 8.159269145 |
| FAHD2B   | -0.697147036 | 2.413324083 | -5.846991738 | 3.87E-08 | 8.30E-07 | 8.142110793 |
| UBTD1    | 0.946839108  | 3.256853734 | 5.835632147  | 4.08E-08 | 8.73E-07 | 8.089759105 |
| FAM229B  | -0.698956642 | 1.561647513 | -5.835322687 | 4.09E-08 | 8.73E-07 | 8.088333754 |
| PYCARD   | 0.783858441  | 5.782293231 | 5.82927796   | 4.21E-08 | 8.97E-07 | 8.060500948 |
| MYOZ3    | -0.856330573 | 2.185421438 | -5.828982815 | 4.21E-08 | 8.98E-07 | 8.059142387 |
| MICAL1   | 1.002189315  | 6.061981847 | 5.825201099  | 4.29E-08 | 9.13E-07 | 8.041738569 |
| TMEM120A | 0.704351541  | 3.988183242 | 5.822061935  | 4.35E-08 | 9.26E-07 | 8.027296812 |
| IL4R     | 0.861724892  | 4.892206994 | 5.81627819   | 4.47E-08 | 9.50E-07 | 8.000700456 |
| RCN1     | -0.60457515  | 4.504932108 | -5.810846126 | 4.59E-08 | 9.73E-07 | 7.975735271 |
| LTBR     | 0.595073354  | 5.092811826 | 5.804949101  | 4.72E-08 | 9.99E-07 | 7.94864853  |
| ZNF253   | -0.761925481 | 4.032726467 | -5.797774467 | 4.88E-08 | 1.03E-06 | 7.915714951 |
| TCEAL4   | -0.697638348 | 4.858847369 | -5.797317312 | 4.89E-08 | 1.03E-06 | 7.913617282 |
| DNMT3A   | -0.587725693 | 4.729137366 | -5.79342564  | 4.98E-08 | 1.05E-06 | 7.895764169 |
| S100A10  | 1.772534413  | 6.32798947  | 5.792424269  | 5.01E-08 | 1.05E-06 | 7.891171491 |
| RUFY4    | 0.905040943  | 0.969611965 | 5.786683495  | 5.14E-08 | 1.08E-06 | 7.864851012 |
| GPR137B  | 0.884002802  | 3.149216545 | 5.777116142  | 5.38E-08 | 1.12E-06 | 7.821020204 |
| TAS2R60  | 1.108359015  | 2.097394499 | 5.776627725  | 5.39E-08 | 1.12E-06 | 7.818783762 |
| LAP3     | 0.622306118  | 5.448073351 | 5.776615664  | 5.40E-08 | 1.12E-06 | 7.81872854  |
| GPRIN3   | 1.122105938  | 2.606896478 | 5.774863506  | 5.44E-08 | 1.13E-06 | 7.810706399 |
| RAB24    | 0.783765631  | 4.156407807 | 5.773915738  | 5.46E-08 | 1.13E-06 | 7.8063677   |
| PKM      | 0.74191131   | 7.65479618  | 5.768519778  | 5.61E-08 | 1.16E-06 | 7.781673984 |
| PTPN6    | 0.756453375  | 7.234023399 | 5.767670303  | 5.63E-08 | 1.16E-06 | 7.777787735 |
| ZNF781   | -0.679491095 | 1.31321807  | -5.766425342 | 5.66E-08 | 1.17E-06 | 7.772092788 |
| DBN1     | -1.11562246  | 3.504567534 | -5.764955244 | 5.70E-08 | 1.17E-06 | 7.765368906 |
| BCL2A1   | 1.462566663  | 4.49759975  | 5.76485052   | 5.70E-08 | 1.17E-06 | 7.764889959 |
| ZNF607   | -0.680535918 | 2.817822889 | -5.764028051 | 5.73E-08 | 1.18E-06 | 7.761128658 |
| LPXN     | 0.77335463   | 5.992287907 | 5.759952472  | 5.84E-08 | 1.20E-06 | 7.742494938 |
| SBF2     | 0.817410127  | 3.306455983 | 5.747809252  | 6.18E-08 | 1.27E-06 | 7.687021529 |
| METAP1D  | -0.637968802 | 3.688895941 | -5.74749529  | 6.19E-08 | 1.27E-06 | 7.685588179 |

|          |              |             |              |          |          |             |
|----------|--------------|-------------|--------------|----------|----------|-------------|
| FCGR3A   | 1.792931264  | 4.109797777 | 5.746744313  | 6.21E-08 | 1.27E-06 | 7.68215989  |
| ARHGEF11 | 1.485765085  | 3.607491639 | 5.746482985  | 6.22E-08 | 1.27E-06 | 7.680966965 |
| MCTP1    | 0.772839175  | 3.917358502 | 5.732253885  | 6.65E-08 | 1.35E-06 | 7.616061265 |
| SPIN4    | -0.911592228 | 4.922614286 | -5.73207834  | 6.65E-08 | 1.35E-06 | 7.615261113 |
| WAS      | 0.641356408  | 7.211238062 | 5.731047334  | 6.69E-08 | 1.36E-06 | 7.610561975 |
| CD74     | 1.449878671  | 10.44922754 | 5.729932622  | 6.72E-08 | 1.36E-06 | 7.605481884 |
| ZNF248   | -0.604255633 | 3.542671017 | -5.728561196 | 6.77E-08 | 1.37E-06 | 7.599232667 |
| PTTG2    | 0.686011963  | 1.654831213 | 5.726768641  | 6.82E-08 | 1.38E-06 | 7.591065812 |
| EXT1     | 0.799578964  | 1.35437553  | 5.725878616  | 6.85E-08 | 1.38E-06 | 7.587011431 |
| VNN1     | 2.177578536  | 3.874046957 | 5.725664716  | 6.86E-08 | 1.38E-06 | 7.586037098 |
| PLOD1    | 0.732917173  | 4.906085531 | 5.724812483  | 6.89E-08 | 1.39E-06 | 7.582155307 |
| RNPEPL1  | 0.709757595  | 5.531318233 | 5.717060035  | 7.14E-08 | 1.44E-06 | 7.546859799 |
| AIM2     | 1.032380245  | 2.083669993 | 5.709283748  | 7.41E-08 | 1.48E-06 | 7.511484211 |
| PEX3     | -0.591300383 | 4.301889541 | -5.707952781 | 7.45E-08 | 1.49E-06 | 7.505432287 |
| SLC26A6  | 0.787866742  | 3.885408723 | 5.704732921  | 7.57E-08 | 1.51E-06 | 7.490795005 |
| ZNF506   | -0.596625676 | 4.600922204 | -5.704248806 | 7.58E-08 | 1.51E-06 | 7.488594673 |
| GMIP     | 0.655122507  | 6.658274326 | 5.702659905  | 7.64E-08 | 1.52E-06 | 7.481373797 |
| ANXA4    | 0.601401104  | 3.873726865 | 5.695440485  | 7.90E-08 | 1.57E-06 | 7.448579668 |
| VOPP1    | 0.775176776  | 3.248072356 | 5.695302639  | 7.91E-08 | 1.57E-06 | 7.447953744 |
| BMP1     | -0.718630402 | 4.161042053 | -5.695000262 | 7.92E-08 | 1.57E-06 | 7.44658076  |
| FLOT1    | 0.952326874  | 5.537973537 | 5.694325754  | 7.94E-08 | 1.57E-06 | 7.443518214 |
| CYP27A1  | 1.605940643  | 1.991508029 | 5.689142495  | 8.14E-08 | 1.61E-06 | 7.419991295 |
| GRIK5    | -1.367837048 | 4.429489501 | -5.681887234 | 8.42E-08 | 1.66E-06 | 7.387080942 |
| DNAAF3   | -0.778898984 | 0.864056491 | -5.675620409 | 8.67E-08 | 1.71E-06 | 7.358674352 |
| ZEB2     | 0.681017306  | 5.77756038  | 5.672267537  | 8.81E-08 | 1.73E-06 | 7.343483957 |
| MYH9     | 0.623846316  | 8.511742757 | 5.667888823  | 8.99E-08 | 1.76E-06 | 7.323653999 |
| C20orf96 | -0.661216425 | 5.317968145 | -5.65517091  | 9.54E-08 | 1.86E-06 | 7.266110093 |
| STK26    | -0.665412093 | 6.802646228 | -5.653161414 | 9.63E-08 | 1.88E-06 | 7.257024941 |
| ZNF503   | 1.289561277  | 2.369906249 | 5.650881468  | 9.73E-08 | 1.90E-06 | 7.246719397 |
| SSH2     | 0.718798497  | 5.505463186 | 5.650166906  | 9.76E-08 | 1.90E-06 | 7.243490032 |
| DPY19L2  | -1.457553067 | 3.546105084 | -5.648689146 | 9.83E-08 | 1.91E-06 | 7.236812273 |
| KIAA0040 | 0.731469527  | 4.660755946 | 5.632997114  | 1.06E-07 | 2.04E-06 | 7.16596722  |
| RTN4R    | -1.278936423 | 3.204676537 | -5.630080959 | 1.07E-07 | 2.07E-06 | 7.152814665 |
| CD300A   | 1.188650202  | 5.193974522 | 5.627774908  | 1.08E-07 | 2.09E-06 | 7.142416731 |
| CTSL     | 1.46848951   | 3.106139485 | 5.627376571  | 1.09E-07 | 2.09E-06 | 7.140620899 |
| SPECC1   | 0.71260832   | 4.197202171 | 5.618704627  | 1.13E-07 | 2.17E-06 | 7.101543924 |
| RHOU     | 1.232440841  | 3.456651518 | 5.615109435  | 1.15E-07 | 2.20E-06 | 7.085354154 |
| C19orf18 | -0.772075781 | 2.621794338 | -5.613268473 | 1.16E-07 | 2.21E-06 | 7.077066405 |
| NPM2     | -1.166600842 | 2.692981452 | -5.611941164 | 1.17E-07 | 2.23E-06 | 7.07109207  |
| GPSM3    | 0.609838506  | 7.358656276 | 5.609302358  | 1.18E-07 | 2.25E-06 | 7.059217101 |
| TMIGD3   | 0.839791432  | 1.44600248  | 5.59785094   | 1.25E-07 | 2.37E-06 | 7.007723368 |
| VWCE     | -1.01694947  | 2.724728412 | -5.593957059 | 1.27E-07 | 2.40E-06 | 6.990228219 |
| MEGF6    | -1.132295797 | 5.135140711 | -5.593705584 | 1.27E-07 | 2.40E-06 | 6.989098595 |
| PTPRC    | 0.713967695  | 7.534960082 | 5.591361746  | 1.28E-07 | 2.42E-06 | 6.978571615 |
| SLA2     | -0.936429945 | 4.712406593 | -5.589079885 | 1.30E-07 | 2.44E-06 | 6.96832556  |
| CXCR2    | 1.131885022  | 2.611827913 | 5.585478073  | 1.32E-07 | 2.48E-06 | 6.9521578   |
| CLEC12B  | 0.899717632  | 2.936843801 | 5.579195188  | 1.36E-07 | 2.55E-06 | 6.923970429 |

|          |              |             |              |          |          |             |
|----------|--------------|-------------|--------------|----------|----------|-------------|
| ZNF551   | -0.681335701 | 4.14984802  | -5.574836848 | 1.39E-07 | 2.59E-06 | 6.904428611 |
| TMEM104  | 0.727186101  | 4.783512073 | 5.570421588  | 1.41E-07 | 2.65E-06 | 6.884641049 |
| CD83     | 0.876224975  | 4.630808514 | 5.565795742  | 1.44E-07 | 2.70E-06 | 6.863919958 |
| GDF11    | -0.719386592 | 3.973118774 | -5.565163067 | 1.45E-07 | 2.71E-06 | 6.861086755 |
| ZNF550   | -0.671847879 | 3.978201666 | -5.562893187 | 1.46E-07 | 2.73E-06 | 6.850923555 |
| METTL7A  | 0.684295149  | 6.584850233 | 5.561688647  | 1.47E-07 | 2.74E-06 | 6.845531357 |
| ANKRD36  | -0.673940097 | 4.104311334 | -5.555892578 | 1.51E-07 | 2.82E-06 | 6.819594838 |
| ZYX      | 0.733340239  | 8.346953231 | 5.55347824   | 1.53E-07 | 2.84E-06 | 6.808795915 |
| SLC25A42 | -0.670601691 | 3.774887605 | -5.550458517 | 1.55E-07 | 2.87E-06 | 6.795293245 |
| POLR3G   | -0.6086921   | 2.814148392 | -5.550360532 | 1.55E-07 | 2.87E-06 | 6.794855177 |
| AHDC1    | -0.850939449 | 4.876069136 | -5.549759118 | 1.56E-07 | 2.88E-06 | 6.792166524 |
| CDC42SE1 | 0.597197079  | 6.876851489 | 5.547962979  | 1.57E-07 | 2.89E-06 | 6.784137846 |
| RASGEF1B | 1.029107286  | 2.921523395 | 5.54742023   | 1.57E-07 | 2.90E-06 | 6.781712093 |
| EMP3     | 0.887326101  | 7.359197373 | 5.54706939   | 1.58E-07 | 2.90E-06 | 6.780144128 |
| VIPR1    | 0.988800129  | 2.077591009 | 5.54246684   | 1.61E-07 | 2.95E-06 | 6.759580171 |
| CIDEB    | 0.673195514  | 1.56708099  | 5.536269008  | 1.66E-07 | 3.02E-06 | 6.731905088 |
| C20orf27 | 0.82862638   | 5.496546352 | 5.527963981  | 1.72E-07 | 3.13E-06 | 6.694850524 |
| ASPHD2   | 0.628758479  | 2.319940704 | 5.523634029  | 1.75E-07 | 3.19E-06 | 6.675545098 |
| IGF1R    | -1.266117399 | 3.494910287 | -5.519174225 | 1.79E-07 | 3.25E-06 | 6.65567043  |
| TNS3     | 1.212925341  | 4.626499807 | 5.518423184  | 1.80E-07 | 3.25E-06 | 6.652324462 |
| KIAA1586 | -0.585841767 | 4.224961342 | -5.517605524 | 1.80E-07 | 3.26E-06 | 6.648682016 |
| PRRG4    | 0.908306188  | 4.073730879 | 5.516826344  | 1.81E-07 | 3.27E-06 | 6.645211299 |
| MEF2D    | 0.628055562  | 6.700936633 | 5.516570563  | 1.81E-07 | 3.27E-06 | 6.644072034 |
| MLNR     | -0.819738748 | 1.656779304 | -5.514220843 | 1.83E-07 | 3.30E-06 | 6.633607745 |
| ABHD6    | 0.781177212  | 2.550325937 | 5.513939005  | 1.84E-07 | 3.30E-06 | 6.632352788 |
| ZNF438   | 0.776573921  | 4.095194159 | 5.511489589  | 1.86E-07 | 3.33E-06 | 6.621447772 |
| ACSS2    | 0.696926802  | 4.736895704 | 5.509623073  | 1.87E-07 | 3.36E-06 | 6.613139887 |
| AIFM3    | 1.054383264  | 2.59887262  | 5.509597726  | 1.87E-07 | 3.36E-06 | 6.613027078 |
| SCGB2B2  | -0.656179515 | 1.639199995 | -5.507897462 | 1.89E-07 | 3.37E-06 | 6.605460706 |
| ITPKA    | -0.97896377  | 1.855193202 | -5.50020282  | 1.95E-07 | 3.49E-06 | 6.571236656 |
| TENT5C   | -1.13135727  | 4.749344928 | -5.499682721 | 1.96E-07 | 3.49E-06 | 6.568924435 |
| EPS8     | 1.301103205  | 2.167072984 | 5.499125679  | 1.96E-07 | 3.50E-06 | 6.566448129 |
| CHST10   | -0.67146422  | 3.239815041 | -5.497453512 | 1.98E-07 | 3.52E-06 | 6.559015502 |
| ZDHHC23  | -0.878682868 | 3.257395735 | -5.497201338 | 1.98E-07 | 3.52E-06 | 6.557894734 |
| TBC1D1   | 0.614113359  | 5.301589547 | 5.497110379  | 1.98E-07 | 3.52E-06 | 6.557490479 |
| TMSB10   | 0.623951987  | 10.85398166 | 5.496073993  | 1.99E-07 | 3.53E-06 | 6.552884717 |
| DGAT2    | 0.832521859  | 1.544983241 | 5.496014391  | 1.99E-07 | 3.53E-06 | 6.552619858 |
| CACNA1C  | -0.735045065 | 1.15738422  | -5.48912185  | 2.06E-07 | 3.64E-06 | 6.52200284  |
| ZNF627   | -0.610419547 | 3.483666695 | -5.482853041 | 2.12E-07 | 3.73E-06 | 6.494177091 |
| HAVCR2   | 1.180185337  | 4.085692229 | 5.480135216  | 2.14E-07 | 3.77E-06 | 6.482119423 |
| PAPSS2   | 0.837753841  | 2.609208898 | 5.47737479   | 2.17E-07 | 3.82E-06 | 6.469876547 |
| ZNF792   | -0.744883405 | 4.022376914 | -5.476931666 | 2.17E-07 | 3.82E-06 | 6.467911586 |
| STK17B   | 0.741751992  | 6.587985643 | 5.468235533  | 2.26E-07 | 3.95E-06 | 6.429369929 |
| ZBTB8A   | -0.923688179 | 2.504547824 | -5.467549201 | 2.27E-07 | 3.95E-06 | 6.426329691 |
| DNAJC18  | -0.606400484 | 2.687696674 | -5.466894242 | 2.28E-07 | 3.96E-06 | 6.423428647 |
| SPNS2    | -1.338184274 | 5.127367429 | -5.464896614 | 2.30E-07 | 3.99E-06 | 6.414581781 |
| KIF13B   | 0.606475141  | 3.77378432  | 5.464781294  | 2.30E-07 | 3.99E-06 | 6.414071125 |

|           |              |             |              |          |          |             |
|-----------|--------------|-------------|--------------|----------|----------|-------------|
| TMEM17    | -0.61025502  | 1.94516242  | -5.460998877 | 2.34E-07 | 4.06E-06 | 6.397325707 |
| CYTL1     | -2.007222648 | 6.140596357 | -5.454691011 | 2.41E-07 | 4.17E-06 | 6.369415707 |
| DLEU7     | 0.707901179  | 1.064411904 | 5.453045254  | 2.43E-07 | 4.19E-06 | 6.362137135 |
| JPH4      | 0.716049745  | 1.408421505 | 5.451102361  | 2.45E-07 | 4.22E-06 | 6.353546197 |
| BIN2      | 0.666372216  | 7.2474826   | 5.4492552    | 2.47E-07 | 4.25E-06 | 6.345380326 |
| MLC1      | -1.113418866 | 6.332371237 | -5.4475031   | 2.49E-07 | 4.28E-06 | 6.337636293 |
| RXFP2     | 1.620411936  | 2.850948663 | 5.443409682  | 2.54E-07 | 4.35E-06 | 6.319550001 |
| UCP2      | 0.696612105  | 7.66296931  | 5.440789229  | 2.57E-07 | 4.40E-06 | 6.307976284 |
| OGDH      | 0.592200187  | 6.023561353 | 5.440200654  | 2.57E-07 | 4.41E-06 | 6.305377212 |
| TUBA4A    | 1.210454678  | 4.333136835 | 5.439462232  | 2.58E-07 | 4.42E-06 | 6.302116679 |
| TOB1      | 0.694864016  | 4.874731783 | 5.438788966  | 2.59E-07 | 4.43E-06 | 6.299144091 |
| ZNF726    | -0.661765844 | 2.171217051 | -5.43159608  | 2.68E-07 | 4.56E-06 | 6.267400523 |
| ABCC3     | 0.985096889  | 1.29277221  | 5.42954344   | 2.70E-07 | 4.60E-06 | 6.258346646 |
| GYG2      | -1.000948069 | 1.3142317   | -5.425596772 | 2.75E-07 | 4.68E-06 | 6.240944505 |
| MSRB1     | 0.872824122  | 5.248645699 | 5.425589196  | 2.75E-07 | 4.68E-06 | 6.240911111 |
| GCNT2     | 0.895852445  | 2.184992366 | 5.420141821  | 2.82E-07 | 4.79E-06 | 6.216904889 |
| TTYH2     | 0.744543406  | 3.886071104 | 5.412265369  | 2.92E-07 | 4.95E-06 | 6.182220572 |
| FMN1      | 0.782507506  | 0.923432447 | 5.410448765  | 2.95E-07 | 4.99E-06 | 6.174225561 |
| SYTL3     | 0.932807801  | 3.348075545 | 5.410210003  | 2.95E-07 | 4.99E-06 | 6.173174874 |
| TTYH3     | 0.861499798  | 5.7893808   | 5.406932223  | 2.99E-07 | 5.06E-06 | 6.158753768 |
| OAS2      | 1.215157628  | 4.696756134 | 5.406901082  | 2.99E-07 | 5.06E-06 | 6.158616785 |
| FYB1      | 0.803694158  | 6.701804837 | 5.403758404  | 3.04E-07 | 5.13E-06 | 6.14479528  |
| NFKBIZ    | 0.883745468  | 6.31298943  | 5.400423304  | 3.08E-07 | 5.19E-06 | 6.130133018 |
| PLXNB1    | -1.216747652 | 2.672848689 | -5.399366552 | 3.10E-07 | 5.21E-06 | 6.125488354 |
| EXTL2     | -0.618799699 | 3.824774173 | -5.397262377 | 3.13E-07 | 5.26E-06 | 6.116241729 |
| ACSL1     | 1.146413918  | 5.533806126 | 5.394261439  | 3.17E-07 | 5.32E-06 | 6.103058271 |
| RNF43     | -0.719812618 | 2.523651255 | -5.386457651 | 3.29E-07 | 5.49E-06 | 6.068796935 |
| HTATIP2   | 0.927525839  | 3.857149017 | 5.384679563  | 3.31E-07 | 5.53E-06 | 6.060994882 |
| PREX1     | 0.703207909  | 6.625880698 | 5.383040657  | 3.34E-07 | 5.56E-06 | 6.053804976 |
| CLIP2     | -1.10682845  | 5.202856227 | -5.380544258 | 3.38E-07 | 5.60E-06 | 6.042855891 |
| ARPIN     | 0.830640499  | 1.133339315 | 5.370862025  | 3.53E-07 | 5.84E-06 | 6.000420373 |
| DHRS11    | -0.689457911 | 2.992882016 | -5.362704653 | 3.66E-07 | 6.05E-06 | 5.964705507 |
| PDZD8     | -0.916189762 | 4.840937365 | -5.358715798 | 3.73E-07 | 6.14E-06 | 5.947253866 |
| CRIP3     | 0.736220369  | 1.167778945 | 5.358428927  | 3.73E-07 | 6.15E-06 | 5.945999092 |
| SPTLC3    | -0.928018454 | 1.678293324 | -5.354138233 | 3.80E-07 | 6.25E-06 | 5.927236685 |
| HHLA2     | 0.738909988  | 0.962824639 | 5.354003474  | 3.81E-07 | 6.25E-06 | 5.926647562 |
| BCL2L11   | 0.837738965  | 3.444237968 | 5.352853809  | 3.83E-07 | 6.28E-06 | 5.921621987 |
| ZNF254    | -0.597884705 | 3.906700092 | -5.351255678 | 3.85E-07 | 6.31E-06 | 5.91463715  |
| SMPDL3B   | -0.959885457 | 2.613124206 | -5.344918785 | 3.97E-07 | 6.48E-06 | 5.886953958 |
| PLEKHG4   | -1.021429458 | 2.985653958 | -5.340001805 | 4.05E-07 | 6.61E-06 | 5.865488101 |
| ZNF318    | 0.662763199  | 4.346796393 | 5.339892611  | 4.06E-07 | 6.61E-06 | 5.865011539 |
| FOLR3     | 1.205895226  | 1.401628761 | 5.339755369  | 4.06E-07 | 6.61E-06 | 5.864412573 |
| TRIM7     | 0.664510635  | 0.944271274 | 5.339047724  | 4.07E-07 | 6.62E-06 | 5.86132436  |
| CTTNBP2NL | 0.837684733  | 1.899796714 | 5.336439745  | 4.12E-07 | 6.68E-06 | 5.84994519  |
| CABLES1   | -1.08951134  | 2.5999054   | -5.333367856 | 4.18E-07 | 6.76E-06 | 5.836546413 |
| CCDC169   | -0.689311698 | 1.444418423 | -5.329068807 | 4.26E-07 | 6.89E-06 | 5.817803317 |
| C1QA      | 1.957228616  | 3.16539599  | 5.328474117  | 4.27E-07 | 6.90E-06 | 5.815211333 |

|           |              |             |              |          |          |             |
|-----------|--------------|-------------|--------------|----------|----------|-------------|
| KLHL2     | 0.682631894  | 4.40120512  | 5.323989503  | 4.36E-07 | 7.03E-06 | 5.795670837 |
| SEMA4A    | 1.011170193  | 5.010098683 | 5.32223311   | 4.39E-07 | 7.08E-06 | 5.788020684 |
| SLC22A18  | 0.793772869  | 2.727337272 | 5.321830285  | 4.40E-07 | 7.08E-06 | 5.786266365 |
| RAB9B     | -0.779806005 | 1.819259657 | -5.317680876 | 4.48E-07 | 7.21E-06 | 5.768200435 |
| ZFP36L1   | 1.206569195  | 5.058603032 | 5.308944185  | 4.66E-07 | 7.47E-06 | 5.730191514 |
| BASP1     | 1.673488468  | 4.435116186 | 5.308892286  | 4.67E-07 | 7.47E-06 | 5.729965847 |
| CCIN      | 0.643658575  | 1.317007983 | 5.307209412  | 4.70E-07 | 7.52E-06 | 5.722649139 |
| C11orf95  | -0.71837362  | 3.689603382 | -5.306592627 | 4.71E-07 | 7.53E-06 | 5.719967885 |
| ZNF850    | -0.590483481 | 3.422713181 | -5.30297933  | 4.79E-07 | 7.64E-06 | 5.704264364 |
| TESPA1    | -1.078928624 | 5.272023924 | -5.30121716  | 4.83E-07 | 7.68E-06 | 5.696608384 |
| C17orf97  | -0.678282418 | 2.744146697 | -5.300621112 | 4.84E-07 | 7.69E-06 | 5.694019143 |
| IL12RB1   | 0.930424068  | 3.551821413 | 5.297656769  | 4.91E-07 | 7.77E-06 | 5.68114476  |
| JMY       | -0.919444926 | 3.292008705 | -5.297393961 | 4.91E-07 | 7.77E-06 | 5.680003587 |
| C20orf203 | -0.83827496  | 1.569777238 | -5.296976998 | 4.92E-07 | 7.78E-06 | 5.67819311  |
| CXorf65   | -0.781226779 | 3.628133056 | -5.290233945 | 5.07E-07 | 8.01E-06 | 5.648927053 |
| RARG      | 0.751228966  | 2.52109688  | 5.290085655  | 5.08E-07 | 8.01E-06 | 5.648283714 |
| SLC04C1   | 1.164717275  | 2.738794491 | 5.288321783  | 5.12E-07 | 8.05E-06 | 5.640632269 |
| PRR5      | -0.785979024 | 3.030468842 | -5.28676687  | 5.15E-07 | 8.10E-06 | 5.633888615 |
| EPCAM     | -1.376462453 | 1.649854596 | -5.285533716 | 5.18E-07 | 8.14E-06 | 5.628541334 |
| REXO5     | -0.673958786 | 4.307199943 | -5.266512727 | 5.64E-07 | 8.81E-06 | 5.546162701 |
| TRPV4     | 0.632811989  | 0.482502313 | 5.260765152  | 5.79E-07 | 9.02E-06 | 5.521307886 |
| SERTAD1   | 0.590178479  | 2.922549773 | 5.247582329  | 6.14E-07 | 9.55E-06 | 5.464366117 |
| HRH2      | 1.273077268  | 4.929201733 | 5.247381561  | 6.15E-07 | 9.55E-06 | 5.463499635 |
| RAVER2    | -0.702643615 | 4.569672917 | -5.246150861 | 6.18E-07 | 9.59E-06 | 5.458188591 |
| CEP70     | -0.90013787  | 3.708791317 | -5.245918144 | 6.19E-07 | 9.60E-06 | 5.457184399 |
| STXBP2    | 0.672437764  | 5.418660382 | 5.242629054  | 6.28E-07 | 9.72E-06 | 5.442994801 |
| SETD7     | 0.923096216  | 3.020349159 | 5.241453026  | 6.31E-07 | 9.76E-06 | 5.437922644 |
| HNMT      | 1.487040822  | 2.276150172 | 5.240081516  | 6.35E-07 | 9.81E-06 | 5.43200831  |
| B3GNTL1   | -0.614075434 | 4.917659041 | -5.238203634 | 6.41E-07 | 9.89E-06 | 5.423911979 |
| TMEM217   | -0.958637563 | 2.770891201 | -5.231536798 | 6.60E-07 | 1.02E-05 | 5.395183628 |
| PRRT3     | -0.724930844 | 2.860881034 | -5.228496691 | 6.69E-07 | 1.03E-05 | 5.382091229 |
| GPR84     | 0.912401969  | 1.736992922 | 5.226352984  | 6.75E-07 | 1.03E-05 | 5.372862193 |
| HLA-DPA1  | 1.622854279  | 6.408863457 | 5.224317467  | 6.81E-07 | 1.04E-05 | 5.364101196 |
| ERG       | -1.181219247 | 5.243629013 | -5.210591146 | 7.24E-07 | 1.10E-05 | 5.305080011 |
| CLEC1B    | 0.907970946  | 3.465904803 | 5.204748343  | 7.44E-07 | 1.13E-05 | 5.279987388 |
| ZNF320    | -0.622370874 | 3.675807756 | -5.203139034 | 7.49E-07 | 1.14E-05 | 5.273079231 |
| CCDC88B   | 0.936018299  | 5.217910386 | 5.202882496  | 7.50E-07 | 1.14E-05 | 5.271978136 |
| KIF17     | 1.16177306   | 1.541567176 | 5.200349101  | 7.58E-07 | 1.15E-05 | 5.261106388 |
| SPACA9    | -0.813950074 | 2.548510473 | -5.195929613 | 7.73E-07 | 1.17E-05 | 5.242148947 |
| CLDN23    | 0.610299363  | 0.932103604 | 5.19245023   | 7.85E-07 | 1.18E-05 | 5.227231478 |
| CBR1      | 0.864175086  | 3.772782139 | 5.188311865  | 8.00E-07 | 1.20E-05 | 5.209497173 |
| NKD1      | -0.779328801 | 1.089040709 | -5.187245336 | 8.04E-07 | 1.20E-05 | 5.204928227 |
| GPR35     | 0.815786322  | 2.561719693 | 5.18334166   | 8.18E-07 | 1.23E-05 | 5.18821033  |
| ZNF429    | -0.716303245 | 3.588071789 | -5.179229623 | 8.33E-07 | 1.25E-05 | 5.170608991 |
| CARNS1    | -0.83597793  | 2.28576933  | -5.178776784 | 8.35E-07 | 1.25E-05 | 5.168671193 |
| PI4K2A    | 0.870562319  | 2.731147188 | 5.177908646  | 8.38E-07 | 1.25E-05 | 5.164956556 |
| PPP1R18   | 0.676279989  | 6.500101841 | 5.176271766  | 8.44E-07 | 1.26E-05 | 5.157953686 |

|            |              |             |              |          |          |             |
|------------|--------------|-------------|--------------|----------|----------|-------------|
| ZNF544     | -0.772291185 | 4.52241739  | -5.174057569 | 8.52E-07 | 1.27E-05 | 5.148483251 |
| ZNF30      | -0.599051006 | 2.391737753 | -5.173940042 | 8.53E-07 | 1.27E-05 | 5.147980646 |
| LRP10      | 0.713988318  | 5.321186168 | 5.171157439  | 8.63E-07 | 1.29E-05 | 5.13608299  |
| HLA-DMA    | 1.173501813  | 6.903804456 | 5.159936975  | 9.07E-07 | 1.35E-05 | 5.088149796 |
| KCTD17     | 0.810781964  | 2.526598002 | 5.158139648  | 9.14E-07 | 1.36E-05 | 5.080478048 |
| ADD3       | 0.753766325  | 6.038658067 | 5.155331957  | 9.26E-07 | 1.37E-05 | 5.068497145 |
| VAV2       | 0.927497433  | 3.616443724 | 5.152993136  | 9.35E-07 | 1.38E-05 | 5.058520259 |
| ANKRD36B   | -0.625075871 | 3.379357734 | -5.151301345 | 9.42E-07 | 1.39E-05 | 5.051305303 |
| RNH1       | 0.622103284  | 5.510955069 | 5.141131007  | 9.86E-07 | 1.45E-05 | 5.007964804 |
| KCNJ2      | 0.714528064  | 0.694091132 | 5.132309526  | 1.02E-06 | 1.50E-05 | 4.970417979 |
| LSP1       | 1.359290761  | 5.8697923   | 5.131850034  | 1.03E-06 | 1.50E-05 | 4.968463409 |
| ZNF793     | -0.938480922 | 1.732457968 | -5.130484667 | 1.03E-06 | 1.50E-05 | 4.96265614  |
| ZNF66      | -0.76109145  | 3.833187001 | -5.129570716 | 1.04E-06 | 1.51E-05 | 4.958769429 |
| PTK7       | -1.095706457 | 3.915828454 | -5.128245456 | 1.04E-06 | 1.51E-05 | 4.953134376 |
| COL8A2     | 0.998633639  | 1.711654353 | 5.125676026  | 1.06E-06 | 1.53E-05 | 4.942211799 |
| DDX60L     | 0.725430059  | 4.717952687 | 5.124033208  | 1.06E-06 | 1.54E-05 | 4.935230112 |
| CD320      | -0.864727459 | 3.432647752 | -5.123514988 | 1.07E-06 | 1.54E-05 | 4.933028076 |
| PLAUR      | 1.077903531  | 4.809658668 | 5.12210481   | 1.07E-06 | 1.55E-05 | 4.927036648 |
| ZNF43      | -0.678309884 | 4.443733078 | -5.120726395 | 1.08E-06 | 1.55E-05 | 4.92118122  |
| INSL6      | 0.725362853  | 2.668830473 | 5.120235019  | 1.08E-06 | 1.56E-05 | 4.919094131 |
| ANKRD13B   | -0.750631075 | 3.163708925 | -5.119348751 | 1.09E-06 | 1.56E-05 | 4.915330103 |
| EMILIN2    | 0.980620978  | 5.968945213 | 5.118123993  | 1.09E-06 | 1.57E-05 | 4.910129194 |
| SAMSN1     | 0.734027101  | 5.484405426 | 5.118059802  | 1.09E-06 | 1.57E-05 | 4.909856631 |
| GPC2       | -0.670392477 | 1.809951269 | -5.111854424 | 1.12E-06 | 1.61E-05 | 4.883518471 |
| SFXN3      | 0.906431937  | 5.274079278 | 5.105316523  | 1.15E-06 | 1.65E-05 | 4.855791769 |
| TOM1       | 0.659286363  | 4.725915838 | 5.105031811  | 1.16E-06 | 1.65E-05 | 4.854584861 |
| CARMIL2    | -0.926558356 | 4.461667792 | -5.096330874 | 1.20E-06 | 1.71E-05 | 4.817722648 |
| 2-Mar      | 0.608251316  | 4.658895998 | 5.095637767  | 1.20E-06 | 1.71E-05 | 4.814788035 |
| TNKS1BP1   | -0.625552718 | 2.922289478 | -5.09051096  | 1.23E-06 | 1.75E-05 | 4.793089348 |
| TMPRSS9    | -0.625884922 | 2.897603485 | -5.0869752   | 1.25E-06 | 1.78E-05 | 4.77813304  |
| MTSS1      | 1.171933448  | 4.09110557  | 5.086774996  | 1.25E-06 | 1.78E-05 | 4.77728638  |
| KCNQ5      | -1.041025992 | 3.928254486 | -5.083699307 | 1.27E-06 | 1.80E-05 | 4.764282121 |
| NPW        | -1.273330371 | 3.642083622 | -5.08156676  | 1.28E-06 | 1.81E-05 | 4.755268607 |
| CAMK1      | 0.973663964  | 2.334759533 | 5.080769785  | 1.29E-06 | 1.82E-05 | 4.751900718 |
| MTHFD1L    | -0.623244252 | 4.529466333 | -5.077701499 | 1.30E-06 | 1.84E-05 | 4.73893792  |
| NCEH1      | 0.679806527  | 3.871304157 | 5.069055775  | 1.35E-06 | 1.90E-05 | 4.702439713 |
| CIB3       | -0.701720656 | 2.106977147 | -5.068145521 | 1.36E-06 | 1.91E-05 | 4.698599453 |
| NLRC3      | -0.752905056 | 4.770953717 | -5.066901688 | 1.37E-06 | 1.92E-05 | 4.693352599 |
| H2AFJ      | 1.020021374  | 3.124568811 | 5.064322676  | 1.38E-06 | 1.94E-05 | 4.682476298 |
| RHOG       | 0.618075609  | 7.922617139 | 5.064275209  | 1.38E-06 | 1.94E-05 | 4.682276151 |
| ASAP1      | 0.695557136  | 5.167334825 | 5.059872508  | 1.41E-06 | 1.97E-05 | 4.663717556 |
| MRC1       | 1.659892297  | 2.444747647 | 5.050840007  | 1.47E-06 | 2.04E-05 | 4.625676749 |
| AC099489.1 | -1.388392521 | 2.892580398 | -5.050659459 | 1.47E-06 | 2.04E-05 | 4.624916823 |
| TAS2R5     | -0.730009958 | 2.926068206 | -5.048943577 | 1.48E-06 | 2.05E-05 | 4.617695597 |
| STX3       | 0.702272808  | 4.525083153 | 5.044109865  | 1.51E-06 | 2.09E-05 | 4.597361908 |
| ACSM3      | -1.335277433 | 4.376431386 | -5.040370489 | 1.53E-06 | 2.13E-05 | 4.581640616 |
| CYBA       | 0.645728408  | 7.595451565 | 5.033999077  | 1.58E-06 | 2.18E-05 | 4.554871521 |

|          |              |             |              |          |          |             |
|----------|--------------|-------------|--------------|----------|----------|-------------|
| HLA-DPB1 | 1.455686392  | 7.030764599 | 5.031437453  | 1.60E-06 | 2.20E-05 | 4.544115397 |
| ZFP2     | -0.588613647 | 1.673371363 | -5.028022099 | 1.62E-06 | 2.23E-05 | 4.529780204 |
| TIMP2    | 0.606240621  | 6.460786622 | 5.027487148  | 1.62E-06 | 2.23E-05 | 4.527535458 |
| PSTPIP1  | 0.927354731  | 4.858259303 | 5.0262447    | 1.63E-06 | 2.24E-05 | 4.522322543 |
| CCDC57   | -0.751450251 | 4.434190289 | -5.024874975 | 1.64E-06 | 2.25E-05 | 4.516576619 |
| ARMH2    | 0.662557399  | 1.745376735 | 5.020542997  | 1.67E-06 | 2.29E-05 | 4.4984111   |
| KIT      | -1.299798903 | 6.506151086 | -5.018380608 | 1.69E-06 | 2.31E-05 | 4.489347364 |
| MDFI     | -1.541656132 | 2.764564686 | -5.013255046 | 1.73E-06 | 2.35E-05 | 4.467873841 |
| SLC38A5  | -0.662700151 | 4.436262652 | -5.008092141 | 1.77E-06 | 2.40E-05 | 4.446258757 |
| CORO1A   | 0.735418121  | 7.907143827 | 5.006633412  | 1.78E-06 | 2.41E-05 | 4.440154336 |
| C11orf80 | -0.591399875 | 3.036836531 | -5.006329282 | 1.78E-06 | 2.42E-05 | 4.438881777 |
| CTXN1    | -0.641423724 | 0.939489116 | -5.005574121 | 1.79E-06 | 2.42E-05 | 4.435722209 |
| OSCAR    | 1.445517086  | 5.371567358 | 5.001862545  | 1.81E-06 | 2.45E-05 | 4.420197773 |
| QPRT     | -0.860376789 | 3.746716093 | -4.999923154 | 1.83E-06 | 2.47E-05 | 4.412088946 |
| SASH3    | 0.65384342   | 7.225464281 | 4.998036892  | 1.84E-06 | 2.48E-05 | 4.404204283 |
| DPEP2    | 0.692701756  | 5.382775216 | 4.994836114  | 1.87E-06 | 2.51E-05 | 4.390829469 |
| CDC42EP2 | 0.682358711  | 2.778643968 | 4.991143415  | 1.90E-06 | 2.55E-05 | 4.375406272 |
| HLA-DQA1 | 1.471111604  | 4.246838202 | 4.989311401  | 1.92E-06 | 2.57E-05 | 4.367757401 |
| PARD6G   | -0.643144223 | 1.39632659  | -4.989061446 | 1.92E-06 | 2.57E-05 | 4.366713958 |
| SAMD10   | -0.732005282 | 4.277036018 | -4.987014759 | 1.94E-06 | 2.59E-05 | 4.358171325 |
| TREML4   | 0.836237546  | 1.200027807 | 4.985028402  | 1.95E-06 | 2.61E-05 | 4.349882764 |
| TAF4B    | -0.637186891 | 3.598942249 | -4.980884544 | 1.99E-06 | 2.65E-05 | 4.332598667 |
| NPEPL1   | 0.599356325  | 3.386423924 | 4.979856338  | 2.00E-06 | 2.66E-05 | 4.328311502 |
| WDR49    | 1.308685196  | 3.092078391 | 4.976251421  | 2.03E-06 | 2.69E-05 | 4.31328532  |
| IL17RE   | -1.67107167  | 2.667896123 | -4.974949397 | 2.04E-06 | 2.71E-05 | 4.307859969 |
| GNRHR    | -0.594328001 | 1.519444516 | -4.972115693 | 2.06E-06 | 2.74E-05 | 4.296055634 |
| ZNF385C  | -1.007509604 | 2.269813488 | -4.970183287 | 2.08E-06 | 2.75E-05 | 4.288008437 |
| CENPV    | -0.595786512 | 4.32840902  | -4.968114392 | 2.10E-06 | 2.78E-05 | 4.279395193 |
| FAM107B  | 0.819433863  | 5.595981479 | 4.967922011  | 2.10E-06 | 2.78E-05 | 4.278594395 |
| HIP1     | 0.97762356   | 4.81977791  | 4.963676283  | 2.14E-06 | 2.82E-05 | 4.260926599 |
| ST3GAL5  | 0.803482687  | 3.468989217 | 4.957091813  | 2.20E-06 | 2.90E-05 | 4.233546789 |
| GAMT     | -0.740031654 | 4.293350169 | -4.952902145 | 2.24E-06 | 2.94E-05 | 4.216137954 |
| GATA2    | -1.327103233 | 5.438546215 | -4.952500715 | 2.25E-06 | 2.94E-05 | 4.214470464 |
| ZNF737   | -0.852619365 | 3.708071005 | -4.949689518 | 2.27E-06 | 2.97E-05 | 4.202795661 |
| FZD7     | -0.62061443  | 1.492248314 | -4.948570789 | 2.29E-06 | 2.98E-05 | 4.198150868 |
| MDK      | -1.063988692 | 4.379403112 | -4.945326865 | 2.32E-06 | 3.02E-05 | 4.184686618 |
| TSPO     | 0.834608749  | 6.965112357 | 4.937264021  | 2.40E-06 | 3.11E-05 | 4.151246893 |
| ALDH3A2  | 0.811063517  | 3.934722903 | 4.936864696  | 2.40E-06 | 3.11E-05 | 4.149591702 |
| FZD2     | 1.218492486  | 2.761840961 | 4.936763921  | 2.40E-06 | 3.11E-05 | 4.149174007 |
| ZNF772   | -0.708104453 | 3.292777117 | -4.935018936 | 2.42E-06 | 3.14E-05 | 4.141942255 |
| MTSS2    | -0.772247567 | 3.117139247 | -4.931782078 | 2.46E-06 | 3.17E-05 | 4.128532331 |
| ULK2     | 0.827902996  | 2.719540466 | 4.928890031  | 2.49E-06 | 3.21E-05 | 4.116555982 |
| ZNF667   | -0.992687282 | 2.064512222 | -4.925964681 | 2.52E-06 | 3.24E-05 | 4.104446581 |
| RTKN     | -0.816070937 | 2.594974882 | -4.924129813 | 2.54E-06 | 3.26E-05 | 4.096853693 |
| ZNF285   | -0.593682698 | 1.496337091 | -4.918919479 | 2.60E-06 | 3.33E-05 | 4.075303262 |
| KCNE3    | 0.774429695  | 4.904375174 | 4.914797574  | 2.64E-06 | 3.38E-05 | 4.058265689 |
| MYO1E    | 0.766181223  | 2.069297516 | 4.90951254   | 2.70E-06 | 3.45E-05 | 4.036434667 |



|            |              |             |              |          |          |             |
|------------|--------------|-------------|--------------|----------|----------|-------------|
| KLK1       | 0.642774525  | 0.758223441 | 4.908431495  | 2.72E-06 | 3.46E-05 | 4.031971142 |
| ZBTB47     | 0.632898677  | 3.103366389 | 4.905145084  | 2.76E-06 | 3.51E-05 | 4.018406004 |
| JDP2       | 0.760842779  | 3.637464856 | 4.895023452  | 2.88E-06 | 3.65E-05 | 3.976666507 |
| BLNK       | 1.454816079  | 3.212667832 | 4.890446067  | 2.93E-06 | 3.71E-05 | 3.957809693 |
| SLC25A29   | -0.858540345 | 5.665853485 | -4.888151413 | 2.96E-06 | 3.74E-05 | 3.948361268 |
| CRTAM      | 0.629312631  | 1.59680086  | 4.887974989  | 2.97E-06 | 3.75E-05 | 3.947634955 |
| HACD1      | -0.762824916 | 3.732086916 | -4.88149319  | 3.05E-06 | 3.84E-05 | 3.920962695 |
| NID1       | 1.600658949  | 3.717340521 | 4.878567954  | 3.09E-06 | 3.88E-05 | 3.908933448 |
| AC092835.1 | -0.587112342 | 1.789830455 | -4.878462657 | 3.09E-06 | 3.88E-05 | 3.908500532 |
| BCL2       | -0.692864432 | 4.758614506 | -4.870569368 | 3.20E-06 | 4.00E-05 | 3.876066671 |
| ATP7B      | -1.172870263 | 2.51472848  | -4.870259752 | 3.20E-06 | 4.01E-05 | 3.874795181 |
| ZNF154     | -0.93811629  | 3.831573709 | -4.86929958  | 3.21E-06 | 4.02E-05 | 3.870852424 |
| BTG1       | 0.711704948  | 6.529325478 | 4.863424231  | 3.29E-06 | 4.11E-05 | 3.846738105 |
| SKAP2      | 1.202057491  | 5.57343047  | 4.859438737  | 3.35E-06 | 4.18E-05 | 3.830391749 |
| CDCA7L     | -0.693076439 | 5.333160083 | -4.852565781 | 3.45E-06 | 4.30E-05 | 3.80222424  |
| SLC17A9    | -0.846939736 | 6.230776805 | -4.844916052 | 3.56E-06 | 4.42E-05 | 3.770905563 |
| GCA        | 0.697920758  | 5.784868002 | 4.839819386  | 3.64E-06 | 4.51E-05 | 3.750058268 |
| SERPINI2   | 1.242151176  | 2.748977952 | 4.837622736  | 3.68E-06 | 4.54E-05 | 3.741077807 |
| TLCD3A     | -0.61395956  | 2.607066279 | -4.834377333 | 3.73E-06 | 4.60E-05 | 3.727814926 |
| MEX3A      | -0.95772759  | 1.82568986  | -4.83149601  | 3.77E-06 | 4.65E-05 | 3.716045074 |
| CERCAM     | -1.042769577 | 3.69281394  | -4.827580026 | 3.84E-06 | 4.72E-05 | 3.700056528 |
| YES1       | -0.845179791 | 3.352428673 | -4.822240528 | 3.93E-06 | 4.82E-05 | 3.67827037  |
| PCBP3      | -1.250398598 | 1.799954452 | -4.822071729 | 3.93E-06 | 4.82E-05 | 3.677581912 |
| GPR34      | 0.965748196  | 2.784779534 | 4.819956867  | 3.96E-06 | 4.86E-05 | 3.668957698 |
| NHSL2      | 1.24100294   | 3.70204852  | 4.812766117  | 4.09E-06 | 4.99E-05 | 3.639654076 |
| DHCR7      | -0.740503419 | 3.723248752 | -4.809146239 | 4.15E-06 | 5.06E-05 | 3.624913882 |
| SORCS2     | 0.891659501  | 1.115022906 | 4.806850271  | 4.19E-06 | 5.10E-05 | 3.615568653 |
| ZSCAN18    | -0.677900517 | 3.239902773 | -4.794822534 | 4.41E-06 | 5.35E-05 | 3.566663041 |
| G6PD       | 0.651952693  | 6.157802109 | 4.793195111  | 4.44E-06 | 5.38E-05 | 3.560052363 |
| FNIP2      | 0.683092842  | 3.228650157 | 4.791711053  | 4.47E-06 | 5.40E-05 | 3.554025401 |
| DOC2A      | -0.875598797 | 2.158506533 | -4.777752259 | 4.74E-06 | 5.70E-05 | 3.497400396 |
| ERV3-1     | -0.711070821 | 5.126525758 | -4.777706288 | 4.74E-06 | 5.70E-05 | 3.497214102 |
| SLC27A3    | 0.662199515  | 4.102293502 | 4.771415538  | 4.87E-06 | 5.84E-05 | 3.471732943 |
| TWINK      | -0.588984856 | 3.977734203 | -4.761129126 | 5.08E-06 | 6.07E-05 | 3.430117526 |
| VENTX      | 1.437806449  | 2.165945165 | 4.756455003  | 5.18E-06 | 6.18E-05 | 3.411228301 |
| FGD6       | 0.827490048  | 1.984201415 | 4.755571358  | 5.20E-06 | 6.19E-05 | 3.407658741 |
| GPAT3      | 1.279880258  | 3.127638741 | 4.75230174   | 5.28E-06 | 6.27E-05 | 3.394454875 |
| ZNF528     | -0.750042827 | 3.33942236  | -4.750277987 | 5.32E-06 | 6.31E-05 | 3.386285432 |
| CACNB1     | 0.785589819  | 2.781458024 | 4.749714976  | 5.33E-06 | 6.32E-05 | 3.384013115 |
| ZNF69      | -0.623197906 | 4.396928504 | -4.749256037 | 5.34E-06 | 6.33E-05 | 3.382160971 |
| MCL1       | 0.641683394  | 9.372196859 | 4.747094343  | 5.39E-06 | 6.37E-05 | 3.373438695 |
| PLBD2      | 0.688601085  | 5.026580229 | 4.747044802  | 5.39E-06 | 6.37E-05 | 3.373238833 |
| ANKRD28    | -0.719939637 | 6.217980677 | -4.74680866  | 5.40E-06 | 6.38E-05 | 3.372286194 |
| FOS        | 1.01952565   | 9.732916802 | 4.744173893  | 5.46E-06 | 6.44E-05 | 3.361659311 |
| DOCK10     | 0.813194922  | 4.764423056 | 4.743370444  | 5.48E-06 | 6.45E-05 | 3.358419556 |
| SRGAP3     | -0.838618208 | 1.559060479 | -4.74207518  | 5.51E-06 | 6.48E-05 | 3.353197466 |
| RELT       | 0.745811512  | 5.080728011 | 4.739281435  | 5.57E-06 | 6.55E-05 | 3.34193738  |

|          |              |             |              |          |          |             |
|----------|--------------|-------------|--------------|----------|----------|-------------|
| MMP17    | 1.186891575  | 2.787543631 | 4.738003512  | 5.60E-06 | 6.57E-05 | 3.336788306 |
| BMF      | 0.658271136  | 4.491564154 | 4.735772072  | 5.66E-06 | 6.61E-05 | 3.327799609 |
| PRKCQ    | -0.765566161 | 4.630898548 | -4.7349118   | 5.68E-06 | 6.63E-05 | 3.324335049 |
| PIP4P2   | 0.613693165  | 4.405396399 | 4.733148851  | 5.72E-06 | 6.67E-05 | 3.317236536 |
| DENND11  | -0.683392117 | 5.59249173  | -4.731566305 | 5.76E-06 | 6.71E-05 | 3.310865996 |
| GSDMB    | -0.657655605 | 3.554150877 | -4.727080176 | 5.87E-06 | 6.83E-05 | 3.292815201 |
| ZNF512B  | -0.624925991 | 4.709668034 | -4.726797419 | 5.87E-06 | 6.83E-05 | 3.291677874 |
| TLE4     | 0.632545405  | 5.141449307 | 4.720804834  | 6.02E-06 | 6.98E-05 | 3.267585344 |
| BIVM     | -0.858610431 | 3.378769274 | -4.718676868 | 6.08E-06 | 7.04E-05 | 3.25903526  |
| MICAL3   | -0.608577803 | 2.670084132 | -4.716859907 | 6.12E-06 | 7.08E-05 | 3.251736925 |
| OR52K2   | 1.024029168  | 1.435587744 | 4.71577175   | 6.15E-06 | 7.11E-05 | 3.247366985 |
| KIF26B   | 0.931429322  | 2.257099897 | 4.710098848  | 6.30E-06 | 7.24E-05 | 3.224596606 |
| PDXK     | 0.610697371  | 4.304045738 | 4.708627666  | 6.34E-06 | 7.28E-05 | 3.218694601 |
| ITM2C    | -1.061648038 | 7.346265919 | -4.705412585 | 6.42E-06 | 7.36E-05 | 3.205801038 |
| GIMAP7   | 1.260994668  | 4.336643265 | 4.704582885  | 6.45E-06 | 7.38E-05 | 3.202474667 |
| SCART1   | -0.636300793 | 1.694022584 | -4.704319799 | 6.45E-06 | 7.38E-05 | 3.201420009 |
| PKD2     | -0.688118142 | 5.431163538 | -4.700981946 | 6.54E-06 | 7.48E-05 | 3.188042847 |
| SHANK3   | -1.658537359 | 4.31415791  | -4.69681764  | 6.66E-06 | 7.60E-05 | 3.17136288  |
| ATP6VOA1 | 0.879104757  | 4.329968394 | 4.69666081   | 6.66E-06 | 7.60E-05 | 3.170734908 |
| ARVCF    | -0.846186388 | 2.739481951 | -4.693438119 | 6.75E-06 | 7.69E-05 | 3.15783401  |
| SCMH1    | -0.586297732 | 5.806223652 | -4.686548597 | 6.95E-06 | 7.90E-05 | 3.130275224 |
| CHST12   | -0.86331806  | 4.448542698 | -4.685553147 | 6.98E-06 | 7.92E-05 | 3.12629569  |
| CD48     | 1.091044598  | 5.177797106 | 4.685287092  | 6.99E-06 | 7.93E-05 | 3.125232175 |
| KRT23    | 0.722358443  | 0.586116104 | 4.683373679  | 7.04E-06 | 7.98E-05 | 3.117584858 |
| SLC7A1   | -0.589348194 | 5.112444601 | -4.679229364 | 7.17E-06 | 8.11E-05 | 3.101028895 |
| PLEKHA5  | -0.700704248 | 3.397721068 | -4.67794653  | 7.20E-06 | 8.15E-05 | 3.095906253 |
| MDFIC    | 1.086105022  | 4.598136091 | 4.676792477  | 7.24E-06 | 8.19E-05 | 3.091298711 |
| CC2D2A   | 0.680067188  | 2.220180056 | 4.676366246  | 7.25E-06 | 8.20E-05 | 3.089597192 |
| STOX2    | -0.849136926 | 0.80288242  | -4.668490045 | 7.49E-06 | 8.45E-05 | 3.058175077 |
| RAC3     | -0.717938456 | 2.965766924 | -4.668039655 | 7.51E-06 | 8.45E-05 | 3.056379382 |
| PELI3    | 0.635115016  | 2.21381072  | 4.664034206  | 7.63E-06 | 8.59E-05 | 3.040415125 |
| C17orf78 | -0.592848639 | 1.976145036 | -4.66091808  | 7.73E-06 | 8.67E-05 | 3.028002103 |
| LONRF3   | 0.93389728   | 2.665267586 | 4.656183557  | 7.89E-06 | 8.83E-05 | 3.009153496 |
| SEPTIN6  | -0.636310722 | 7.675296617 | -4.6560486   | 7.89E-06 | 8.83E-05 | 3.008616421 |
| WDR35    | -0.873473729 | 3.347919093 | -4.65579625  | 7.90E-06 | 8.83E-05 | 3.007612192 |
| CDK14    | -0.806350692 | 2.897264097 | -4.652379433 | 8.01E-06 | 8.94E-05 | 2.994018756 |
| TRIM6    | -0.807592795 | 2.438530984 | -4.652174438 | 8.02E-06 | 8.94E-05 | 2.993203429 |
| HLA-B    | 0.646863692  | 9.869247975 | 4.650752812  | 8.07E-06 | 8.99E-05 | 2.987549909 |
| AUTS2    | -0.836023215 | 3.132849782 | -4.649977259 | 8.09E-06 | 9.01E-05 | 2.98446621  |
| IRS2     | 0.952617757  | 5.226814839 | 4.649606337  | 8.11E-06 | 9.02E-05 | 2.982991506 |
| CLEC4E   | 1.459222756  | 2.27231661  | 4.643152014  | 8.33E-06 | 9.25E-05 | 2.957343903 |
| RHOBTB1  | -0.968998027 | 2.899972978 | -4.6416859   | 8.38E-06 | 9.30E-05 | 2.951521524 |
| AP5B1    | 0.827365427  | 5.689619973 | 4.64037856   | 8.42E-06 | 9.34E-05 | 2.946330788 |
| WT1      | -1.128942373 | 3.087281923 | -4.639909226 | 8.44E-06 | 9.35E-05 | 2.944467573 |
| ALOX5    | 1.389884288  | 5.458798386 | 4.635761636  | 8.58E-06 | 9.50E-05 | 2.928007819 |
| NTNG2    | -1.617652929 | 4.286235957 | -4.633484181 | 8.67E-06 | 9.58E-05 | 2.918974173 |
| GCAT     | -0.795138943 | 3.117231465 | -4.633475485 | 8.67E-06 | 9.58E-05 | 2.918939687 |

|          |              |             |              |          |             |             |
|----------|--------------|-------------|--------------|----------|-------------|-------------|
| ADGRE1   | 1.314909156  | 4.210490769 | 4.629660459  | 8.80E-06 | 9.71E-05    | 2.903814289 |
| ABHD11   | 0.60922574   | 3.123656756 | 4.629457702  | 8.81E-06 | 9.71E-05    | 2.903010667 |
| SLC2A3   | 0.936626986  | 5.846480206 | 4.629112336  | 8.82E-06 | 9.72E-05    | 2.90164188  |
| MRPL33   | 0.586292926  | 5.742167463 | 4.626580336  | 8.92E-06 | 9.81E-05    | 2.891609032 |
| ANKRD36C | -0.636167012 | 4.523739324 | -4.623621762 | 9.03E-06 | 9.92E-05    | 2.879890879 |
| KIAA0895 | -0.626198171 | 1.275711023 | -4.622119673 | 9.08E-06 | 9.96E-05    | 2.873943536 |
| APOL3    | 0.88454562   | 3.656558675 | 4.620890264  | 9.13E-06 | 0.000100087 | 2.869076863 |
| GPR174   | -1.019411921 | 4.759436512 | -4.620015752 | 9.16E-06 | 0.000100284 | 2.865615627 |
| IRF4     | 0.892349173  | 2.709615396 | 4.618191473  | 9.23E-06 | 0.000100869 | 2.858396814 |
| SOX4     | -0.891855385 | 6.618047729 | -4.617538184 | 9.26E-06 | 0.000101079 | 2.855812192 |
| B4GALT6  | -1.072783605 | 4.68192712  | -4.61728881  | 9.27E-06 | 0.000101079 | 2.854825658 |
| STRBP    | -0.598359065 | 4.280179183 | -4.615625158 | 9.33E-06 | 0.000101687 | 2.848245147 |
| STMN1    | -0.618950912 | 6.836649088 | -4.613219968 | 9.42E-06 | 0.000102502 | 2.838734509 |
| ADM      | 0.90017701   | 1.610964733 | 4.612141906  | 9.47E-06 | 0.000102844 | 2.834472769 |
| ARHGEF40 | 0.75706173   | 4.899342421 | 4.611002207  | 9.51E-06 | 0.000103214 | 2.829968143 |
| NAT14    | -0.590585433 | 3.191038422 | -4.60692198  | 9.67E-06 | 0.000104675 | 2.813847693 |
| SERINC2  | 1.124837258  | 1.985150598 | 4.606378684  | 9.69E-06 | 0.000104794 | 2.811701971 |
| FKBP4    | -0.604015851 | 5.613180428 | -4.593423002 | 1.02E-05 | 0.000110031 | 2.76058776  |
| VASH1    | 0.633139379  | 3.20983687  | 4.590259484  | 1.04E-05 | 0.000111284 | 2.748122359 |
| ATP9A    | -1.100105965 | 1.684709966 | -4.589556485 | 1.04E-05 | 0.000111466 | 2.745353123 |
| DUSP1    | 0.887432987  | 9.045362733 | 4.588835546  | 1.04E-05 | 0.000111658 | 2.742513538 |
| ASNS     | -0.694012743 | 4.08049919  | -4.586671793 | 1.05E-05 | 0.000112441 | 2.733993014 |
| JUNB     | 0.861232823  | 8.415425677 | 4.584280848  | 1.06E-05 | 0.000113396 | 2.724581191 |
| OTULINL  | 1.235355534  | 4.087141556 | 4.583172629  | 1.07E-05 | 0.000113789 | 2.720219946 |
| KCNC4    | -0.595302597 | 2.444618195 | -4.582101606 | 1.07E-05 | 0.000114166 | 2.716005794 |
| UGT3A2   | -1.629293885 | 1.916854298 | -4.578008483 | 1.09E-05 | 0.00011585  | 2.699907122 |
| SLC36A1  | 0.810863125  | 4.715602341 | 4.573545733  | 1.11E-05 | 0.0001178   | 2.682366441 |
| PALM     | -1.264674129 | 2.882472177 | -4.571148925 | 1.12E-05 | 0.000118559 | 2.672950945 |
| CDH24    | -0.856473117 | 2.585694145 | -4.566440649 | 1.14E-05 | 0.000120498 | 2.654465534 |
| TAS2R41  | 0.808354856  | 1.580204981 | 4.56200909   | 1.16E-05 | 0.000122576 | 2.637079075 |
| ZBED3    | -0.748100147 | 4.343554387 | -4.55770365  | 1.18E-05 | 0.000124354 | 2.620199063 |
| SLC9B2   | -0.585847434 | 3.698090096 | -4.556823795 | 1.19E-05 | 0.000124669 | 2.616750896 |
| C9orf64  | 0.701781993  | 3.040312385 | 4.549403931  | 1.23E-05 | 0.00012779  | 2.587691394 |
| TSPAN5   | -0.825931619 | 2.341970518 | -4.54145289  | 1.27E-05 | 0.000131419 | 2.556589485 |
| PDE7B    | 0.693239911  | 1.409501934 | 4.54055066   | 1.27E-05 | 0.00013161  | 2.553062732 |
| HSPA1A   | 0.623394507  | 4.869914883 | 4.540321488  | 1.27E-05 | 0.00013161  | 2.552166996 |
| LTB4R    | 0.683736756  | 5.596236737 | 4.540314489  | 1.27E-05 | 0.00013161  | 2.552139638 |
| GNPDA1   | 0.829435618  | 4.096552253 | 4.531730087  | 1.32E-05 | 0.000135659 | 2.518610415 |
| PPM1J    | 0.738276246  | 0.789126003 | 4.52994748   | 1.33E-05 | 0.000136505 | 2.511653605 |
| FAM171A2 | -0.746247377 | 1.353417162 | -4.521878663 | 1.37E-05 | 0.000140701 | 2.480188977 |
| VIM      | 0.878271994  | 9.52145313  | 4.521721469  | 1.37E-05 | 0.000140717 | 2.479576397 |
| ADAMDEC1 | 0.845568839  | 1.087830147 | 4.520832785  | 1.38E-05 | 0.000141079 | 2.47611351  |
| KANK2    | -0.781017052 | 3.565330098 | -4.519742686 | 1.38E-05 | 0.000141558 | 2.471866457 |
| SLC14A1  | -0.945249525 | 2.359903018 | -4.512435443 | 1.42E-05 | 0.00014553  | 2.443416414 |
| TBXAS1   | 0.655105542  | 5.664427734 | 4.512276101  | 1.43E-05 | 0.000145548 | 2.442796406 |
| CDKN1A   | 1.106535231  | 5.00246818  | 4.511357537  | 1.43E-05 | 0.000146016 | 2.439222517 |
| ARL5C    | 0.814816058  | 1.271552011 | 4.510690633  | 1.43E-05 | 0.000146337 | 2.436628104 |

|          |              |             |              |          |             |             |
|----------|--------------|-------------|--------------|----------|-------------|-------------|
| ARHGEF17 | -0.99165636  | 3.981079527 | -4.509026436 | 1.44E-05 | 0.000147023 | 2.430155193 |
| FGF17    | -0.824943362 | 1.475995399 | -4.505196389 | 1.47E-05 | 0.000148943 | 2.415264779 |
| SLC22A16 | -0.634467433 | 4.65636483  | -4.501437015 | 1.49E-05 | 0.000151079 | 2.400658059 |
| HLA-DRB5 | 1.524097014  | 6.977939748 | 4.496813737  | 1.52E-05 | 0.000153704 | 2.382706861 |
| NAA80    | -0.633327732 | 5.054192677 | -4.495708611 | 1.52E-05 | 0.000154267 | 2.378417876 |
| IGFLR1   | 0.589577354  | 3.143027408 | 4.494103822  | 1.53E-05 | 0.000155164 | 2.372191071 |
| ADGRA2   | 1.155823576  | 3.721480476 | 4.491545614  | 1.55E-05 | 0.00015654  | 2.362268206 |
| HLA-DQB2 | 1.282364291  | 2.484444103 | 4.491374443  | 1.55E-05 | 0.000156567 | 2.361604409 |
| LRRC56   | -0.677402839 | 2.549040542 | -4.4909249   | 1.55E-05 | 0.000156772 | 2.359861181 |
| CPED1    | 0.845820652  | 1.204859892 | 4.486342634  | 1.58E-05 | 0.000158727 | 2.342099393 |
| TAGLN    | 0.633492774  | 3.701632326 | 4.485849626  | 1.59E-05 | 0.000158913 | 2.340189183 |
| MAP1A    | -1.259743399 | 4.023047146 | -4.484993898 | 1.59E-05 | 0.000159341 | 2.336873936 |
| EBF4     | -0.861517202 | 1.0456705   | -4.484883812 | 1.59E-05 | 0.000159341 | 2.336447477 |
| CCL3     | 0.889251778  | 2.613314957 | 4.483827996  | 1.60E-05 | 0.000159861 | 2.33235776  |
| ZNF711   | -1.638607523 | 2.511757879 | -4.482061949 | 1.61E-05 | 0.000160679 | 2.325518522 |
| MPL      | -1.363432602 | 4.319707809 | -4.481443469 | 1.62E-05 | 0.000161    | 2.323123843 |
| IRF7     | 0.793246086  | 5.416582637 | 4.479245868  | 1.63E-05 | 0.000162274 | 2.314616953 |
| ZNF117   | -0.676618205 | 4.523526919 | -4.473968307 | 1.67E-05 | 0.000164705 | 2.294199992 |
| ZBTB46   | -0.669392686 | 3.313750995 | -4.471522953 | 1.68E-05 | 0.000166155 | 2.28474576  |
| RGL1     | 0.727542927  | 1.362122904 | 4.468923513  | 1.70E-05 | 0.000167742 | 2.274699934 |
| INKA1    | -0.786743587 | 5.022102734 | -4.467269643 | 1.71E-05 | 0.000168527 | 2.268310586 |
| SLC7A5   | -0.89282885  | 5.700666571 | -4.46624733  | 1.72E-05 | 0.000169031 | 2.264361978 |
| PRRT4    | -1.429573403 | 2.861537933 | -4.461684277 | 1.75E-05 | 0.000171941 | 2.246745568 |
| AMIGO1   | -0.674998844 | 1.893867609 | -4.461304444 | 1.75E-05 | 0.000171945 | 2.245279753 |
| BDH1     | -0.595395756 | 3.636756221 | -4.458016581 | 1.78E-05 | 0.000173806 | 2.232595364 |
| CPAMD8   | 0.592602814  | 0.830138972 | 4.452763883  | 1.81E-05 | 0.000177265 | 2.212344936 |
| ADGRA3   | -0.755309016 | 3.629538884 | -4.45216488  | 1.82E-05 | 0.000177516 | 2.210036745 |
| ICAM1    | 0.82600524   | 4.030184653 | 4.451660493  | 1.82E-05 | 0.000177713 | 2.20809332  |
| SLC4A3   | 0.838732125  | 1.116011062 | 4.451316659  | 1.83E-05 | 0.000177713 | 2.206768606 |
| AGPAT3   | 0.712240428  | 4.471736908 | 4.451270069  | 1.83E-05 | 0.000177713 | 2.206589111 |
| ITM2A    | -1.472725345 | 6.526220397 | -4.448128893 | 1.85E-05 | 0.00017953  | 2.194490429 |
| CCND2    | -0.959072569 | 6.526745153 | -4.447830779 | 1.85E-05 | 0.000179657 | 2.193342525 |
| PLCL2    | 0.677611219  | 4.307011269 | 4.444128649  | 1.88E-05 | 0.000182086 | 2.179091974 |
| PIK3C2B  | -0.706189723 | 3.798085672 | -4.438212704 | 1.92E-05 | 0.000185555 | 2.156337862 |
| PLXDC2   | 1.019629124  | 4.021922973 | 4.431349164  | 1.98E-05 | 0.000190283 | 2.129966919 |
| FGFR3    | -0.767579631 | 1.59126999  | -4.427730777 | 2.01E-05 | 0.000192787 | 2.116076483 |
| LDLRAD3  | 1.385986563  | 2.518757348 | 4.42733539   | 2.01E-05 | 0.000192999 | 2.114559158 |
| ENC1     | 0.787453688  | 3.249103841 | 4.422843138  | 2.05E-05 | 0.000195936 | 2.097326808 |
| ACP6     | -0.778010174 | 2.566904261 | -4.417548901 | 2.09E-05 | 0.000199657 | 2.077034534 |
| HSPG2    | -1.015911743 | 4.318884605 | -4.412327897 | 2.14E-05 | 0.000203336 | 2.057040446 |
| RNF144A  | -0.602130244 | 4.818229883 | -4.411145362 | 2.15E-05 | 0.000203979 | 2.052514289 |
| NEDD4    | -0.70743033  | 3.871216406 | -4.411082088 | 2.15E-05 | 0.000203979 | 2.05227213  |
| ARAP3    | 1.036907321  | 2.995085263 | 4.409557674  | 2.16E-05 | 0.000205057 | 2.04643881  |
| CXCR4    | 0.813035231  | 8.165035875 | 4.405171659  | 2.20E-05 | 0.000208086 | 2.029663556 |
| CHST2    | 0.848233971  | 3.517207301 | 4.404725526  | 2.20E-05 | 0.000208357 | 2.027957914 |
| LILRA4   | 1.11200299   | 1.542147071 | 4.403856788  | 2.21E-05 | 0.000208982 | 2.024636946 |
| SYNGAP1  | -0.657876606 | 4.707050942 | -4.403073471 | 2.22E-05 | 0.000209537 | 2.021642935 |

|          |              |             |              |          |             |             |
|----------|--------------|-------------|--------------|----------|-------------|-------------|
| FAM117A  | -0.69165739  | 6.741325759 | -4.401397643 | 2.23E-05 | 0.000210438 | 2.015238865 |
| NFATC2   | -0.693262669 | 4.40658915  | -4.39795608  | 2.26E-05 | 0.000213152 | 2.002092787 |
| MYO1G    | 0.671147128  | 6.308411448 | 4.397538062  | 2.27E-05 | 0.000213405 | 2.000496559 |
| SNTB2    | 0.640657214  | 2.000947153 | 4.392717684  | 2.31E-05 | 0.000217247 | 1.982097718 |
| MROH7    | -0.617001734 | 1.836548805 | -4.391689992 | 2.32E-05 | 0.000217826 | 1.978177057 |
| SPTBN2   | -0.630975608 | 1.840542003 | -4.390903092 | 2.33E-05 | 0.000218408 | 1.975175482 |
| EPDR1    | -0.694593822 | 4.904265331 | -4.390527239 | 2.33E-05 | 0.000218631 | 1.973741956 |
| TAS2R4   | -0.611856405 | 2.336710112 | -4.389078554 | 2.34E-05 | 0.000219795 | 1.968217428 |
| BSPRY    | -0.791329362 | 4.017532361 | -4.388036086 | 2.35E-05 | 0.000220501 | 1.964242834 |
| PLCB2    | 0.764755902  | 7.018468536 | 4.38698761   | 2.36E-05 | 0.00022132  | 1.960246039 |
| GPT2     | -0.952556885 | 3.792895552 | -4.385856684 | 2.37E-05 | 0.000222003 | 1.955935729 |
| CDH26    | -0.674599098 | 2.038311497 | -4.382116346 | 2.41E-05 | 0.000225021 | 1.941685998 |
| ADAMTS14 | -1.067756711 | 2.073883366 | -4.380351317 | 2.43E-05 | 0.000226179 | 1.934964806 |
| FAM114A1 | 0.644544777  | 1.904552111 | 4.378745076  | 2.44E-05 | 0.000227525 | 1.928850012 |
| LOXL1    | -0.801424381 | 1.060238705 | -4.375963614 | 2.47E-05 | 0.000229845 | 1.9182652   |
| SOD2     | 0.643436059  | 4.396461445 | 4.375128835  | 2.48E-05 | 0.000230282 | 1.915089428 |
| CHD5     | -0.712341716 | 1.113779197 | -4.369042497 | 2.54E-05 | 0.000235154 | 1.891948576 |
| TMEM38A  | 0.667887531  | 1.364118067 | 4.365163096  | 2.58E-05 | 0.000238478 | 1.877211155 |
| PCSK4    | -0.696583528 | 2.204446189 | -4.355413288 | 2.68E-05 | 0.000246279 | 1.840215517 |
| GCSAML   | -1.381977215 | 3.751802647 | -4.352882824 | 2.71E-05 | 0.000248067 | 1.830623699 |
| FLNA     | 0.664546577  | 8.61089773  | 4.348528175  | 2.75E-05 | 0.00025157  | 1.814126919 |
| PNPLA6   | 0.598464595  | 5.187376501 | 4.345807133  | 2.78E-05 | 0.000253948 | 1.803824977 |
| PSRC1    | 0.679255698  | 2.831525531 | 4.34356216   | 2.81E-05 | 0.000255863 | 1.79532905  |
| GOLGA80  | -0.7122215   | 2.147618627 | -4.341587839 | 2.83E-05 | 0.000257274 | 1.787860082 |
| RAB38    | -0.941062766 | 2.658579175 | -4.340585934 | 2.84E-05 | 0.000257939 | 1.784070781 |
| PLAGL1   | -0.606596613 | 5.676442381 | -4.338107    | 2.87E-05 | 0.000259762 | 1.774698012 |
| DEPP1    | 0.806712255  | 3.176148014 | 4.333788893  | 2.92E-05 | 0.000263882 | 1.758380896 |
| SAMD11   | -0.949229871 | 1.983054079 | -4.328928911 | 2.98E-05 | 0.000268516 | 1.740030621 |
| MAPK12   | -0.710006016 | 3.516221513 | -4.327416008 | 3.00E-05 | 0.000269881 | 1.73432134  |
| TSPAN13  | -1.033193143 | 4.022557672 | -4.324129547 | 3.03E-05 | 0.000273037 | 1.721924263 |
| ARPP21   | -1.056055083 | 0.984070109 | -4.323665692 | 3.04E-05 | 0.000273413 | 1.72017509  |
| DEPTOR   | -0.869905778 | 5.004020847 | -4.320438124 | 3.08E-05 | 0.000276673 | 1.708007969 |
| BLVRA    | 1.033815727  | 4.257384028 | 4.317404     | 3.12E-05 | 0.000279755 | 1.696576254 |
| MPP7     | 0.898914803  | 3.002767384 | 4.314665004  | 3.15E-05 | 0.000282672 | 1.686261642 |
| RENBP    | 0.69127543   | 4.268942176 | 4.313394926  | 3.17E-05 | 0.000283702 | 1.681480391 |
| ZNF681   | -0.64858059  | 2.512587035 | -4.31321257  | 3.17E-05 | 0.000283776 | 1.680793991 |
| PTK6     | 0.639924897  | 2.341885982 | 4.312744473  | 3.17E-05 | 0.00028404  | 1.679032144 |
| DSCC1    | -0.597618894 | 3.874759759 | -4.309992436 | 3.21E-05 | 0.000286619 | 1.66867678  |
| SH3BP1   | 0.654660211  | 5.49889499  | 4.302317108  | 3.31E-05 | 0.000294493 | 1.639822121 |
| ADM2     | -0.637836589 | 1.00698596  | -4.30079424  | 3.33E-05 | 0.000295727 | 1.634101611 |
| BAG2     | -0.613475954 | 1.86554928  | -4.300001806 | 3.34E-05 | 0.000296469 | 1.631125506 |
| ARL10    | -0.781809779 | 2.584327761 | -4.299927935 | 3.34E-05 | 0.000296469 | 1.630848091 |
| THBD     | 0.801667322  | 2.282469083 | 4.298967861  | 3.35E-05 | 0.000297364 | 1.627242986 |
| NFKB2    | 0.692392737  | 4.401280987 | 4.298932647  | 3.35E-05 | 0.000297364 | 1.627110769 |
| KIAA1549 | -0.815773354 | 2.775702783 | -4.295383071 | 3.40E-05 | 0.000301006 | 1.61378731  |
| CD59     | -1.029570676 | 4.113391864 | -4.293538262 | 3.42E-05 | 0.000302103 | 1.606866004 |
| TMEM154  | 0.616111369  | 3.804759958 | 4.288336583  | 3.50E-05 | 0.000307476 | 1.587362462 |

|          |              |             |              |          |             |             |
|----------|--------------|-------------|--------------|----------|-------------|-------------|
| AMN      | -0.882648205 | 2.833381152 | -4.285602201 | 3.53E-05 | 0.000310009 | 1.577117074 |
| IFIT2    | 0.802165846  | 2.80014252  | 4.284539387  | 3.55E-05 | 0.000311011 | 1.573136161 |
| ADPRH    | 0.708551538  | 3.419419479 | 4.282956649  | 3.57E-05 | 0.000312549 | 1.567209177 |
| ADAM15   | 0.5979363    | 5.668057705 | 4.27505869   | 3.68E-05 | 0.00032154  | 1.537657677 |
| CXCL10   | 0.863965553  | 1.240527128 | 4.272854524  | 3.72E-05 | 0.000323901 | 1.52941773  |
| LDLR     | 0.859018629  | 4.004546918 | 4.271332581  | 3.74E-05 | 0.000324919 | 1.523730034 |
| GNA15    | -0.71884738  | 7.052386109 | -4.271258251 | 3.74E-05 | 0.000324919 | 1.523452293 |
| STMN3    | -0.778417955 | 5.057844312 | -4.268018475 | 3.79E-05 | 0.000328199 | 1.511350052 |
| P2RY6    | 0.675182091  | 1.272966713 | 4.263241662  | 3.86E-05 | 0.000333925 | 1.493518756 |
| TAS2R3   | -0.716743217 | 1.919131534 | -4.257408206 | 3.95E-05 | 0.000340326 | 1.471763478 |
| KIF7     | -0.739367817 | 1.933474746 | -4.2547512   | 3.99E-05 | 0.000342976 | 1.461861865 |
| LRRC70   | -0.627898402 | 2.779028295 | -4.252427127 | 4.02E-05 | 0.000345654 | 1.453204773 |
| NEK6     | 0.694830236  | 5.480415464 | 4.248075084  | 4.09E-05 | 0.000350819 | 1.437003135 |
| TXNRD3   | -0.692547721 | 2.520456627 | -4.247077716 | 4.11E-05 | 0.000351881 | 1.433291924 |
| MAPK11   | -0.729652435 | 2.951805427 | -4.244488747 | 4.15E-05 | 0.000354838 | 1.423661422 |
| OCIAD2   | -0.611968456 | 3.532009149 | -4.234732352 | 4.31E-05 | 0.000367499 | 1.387409129 |
| PEAK3    | 0.665473406  | 4.075506288 | 4.234534531  | 4.32E-05 | 0.000367622 | 1.386674724 |
| BTG2     | 0.71836443   | 6.686992103 | 4.227790508  | 4.43E-05 | 0.00037611  | 1.361653291 |
| CPA3     | -1.829712571 | 6.534279463 | -4.223826601 | 4.50E-05 | 0.000380971 | 1.346960587 |
| TSPAN14  | 0.614556521  | 4.480868472 | 4.220286824  | 4.56E-05 | 0.000385425 | 1.333848769 |
| POLE     | -0.59792045  | 5.262275707 | -4.214587538 | 4.67E-05 | 0.000393733 | 1.312755289 |
| CAMK2D   | 0.812354763  | 2.243508408 | 4.214463902  | 4.67E-05 | 0.000393752 | 1.31229794  |
| NUDT10   | -1.074307292 | 1.030073846 | -4.213411598 | 4.69E-05 | 0.000395026 | 1.308405729 |
| ITPR2    | -0.588008504 | 5.164091276 | -4.213130838 | 4.69E-05 | 0.000395286 | 1.307367391 |
| IER5L    | 0.586459331  | 2.07073051  | 4.210186489  | 4.75E-05 | 0.000399322 | 1.296481424 |
| IL6ST    | 0.777944116  | 4.461585045 | 4.205591554  | 4.83E-05 | 0.000405819 | 1.27950435  |
| KIF26A   | -0.855189933 | 1.292643292 | -4.203205272 | 4.88E-05 | 0.000409071 | 1.270693201 |
| OBSCN    | -0.864805628 | 2.813105167 | -4.201436452 | 4.91E-05 | 0.000411182 | 1.264164425 |
| TLN1     | 0.586138389  | 7.945676009 | 4.200480205  | 4.93E-05 | 0.00041218  | 1.26063575  |
| PRKAR2B  | 1.054021702  | 4.443503494 | 4.198924674  | 4.96E-05 | 0.000414144 | 1.254896937 |
| MYC      | -0.758541604 | 7.091357899 | -4.197579315 | 4.98E-05 | 0.000415777 | 1.249934811 |
| TCN2     | 1.135727532  | 3.927236873 | 4.191273317  | 5.11E-05 | 0.000424354 | 1.226692286 |
| BLVRB    | 0.888992694  | 5.750857815 | 4.185221493  | 5.23E-05 | 0.000433034 | 1.204411514 |
| ADCY7    | 0.831032346  | 5.104499544 | 4.179348516  | 5.35E-05 | 0.000441201 | 1.182812558 |
| LMNA     | 1.199047489  | 4.744709858 | 4.179190542  | 5.35E-05 | 0.000441201 | 1.182231898 |
| SV2A     | -0.98023075  | 4.218343853 | -4.176311025 | 5.41E-05 | 0.000444826 | 1.171650664 |
| ZNF391   | -0.779111897 | 1.881863542 | -4.175992849 | 5.42E-05 | 0.000445186 | 1.170481817 |
| SNX24    | 0.649394769  | 1.910797624 | 4.167081128  | 5.61E-05 | 0.000459239 | 1.137771339 |
| GASK1A   | -0.627838334 | 0.661179444 | -4.165087962 | 5.65E-05 | 0.000462399 | 1.130462698 |
| SERPINB9 | 1.031453868  | 4.441255004 | 4.164631686  | 5.66E-05 | 0.00046302  | 1.128789975 |
| ZNF415   | -0.708136793 | 1.61923127  | -4.164183142 | 5.67E-05 | 0.000463628 | 1.127145734 |
| SPINT1   | 1.002368501  | 3.530351217 | 4.163706083  | 5.68E-05 | 0.000464093 | 1.125397114 |
| MAP3K6   | 0.745526086  | 3.358507655 | 4.160808694  | 5.75E-05 | 0.000469116 | 1.114780249 |
| SPPL2B   | -0.608003414 | 5.457581431 | -4.155925179 | 5.86E-05 | 0.000475445 | 1.096898387 |
| GBP2     | 0.870811687  | 4.547173252 | 4.15252076   | 5.93E-05 | 0.000479724 | 1.084441962 |
| AKAP7    | 0.791686781  | 2.953978147 | 4.148559448  | 6.02E-05 | 0.000485488 | 1.06995772  |
| CTSF     | -0.955374424 | 3.211782352 | -4.147140005 | 6.06E-05 | 0.000487544 | 1.064770198 |

|          |              |             |              |             |             |             |
|----------|--------------|-------------|--------------|-------------|-------------|-------------|
| DNM1     | -1.064655664 | 4.057263856 | -4.146826493 | 6.07E-05    | 0.000487729 | 1.063624616 |
| DKK2     | 0.737302853  | 0.697040809 | 4.144654457  | 6.12E-05    | 0.000490903 | 1.055689731 |
| FYN      | 0.684851383  | 4.568401008 | 4.143603061  | 6.14E-05    | 0.000492192 | 1.051849912 |
| ZNF471   | -0.612712443 | 2.225187738 | -4.139616358 | 6.24E-05    | 0.000498772 | 1.037296764 |
| HK1      | 0.63995854   | 5.685478198 | 4.134883074  | 6.35E-05    | 0.000506266 | 1.020032173 |
| NR5A1    | -0.686348521 | 1.107224275 | -4.132841284 | 6.40E-05    | 0.000509836 | 1.012589428 |
| SMO      | -0.86915505  | 1.925346113 | -4.131874868 | 6.42E-05    | 0.000511523 | 1.009067623 |
| FSTL3    | -0.617055491 | 4.390491605 | -4.127230767 | 6.54E-05    | 0.000519663 | 0.992152412 |
| MAST4    | -0.772914835 | 3.570545019 | -4.126824924 | 6.55E-05    | 0.00052026  | 0.990674904 |
| FKBP10   | -0.664310553 | 0.984147583 | -4.124176848 | 6.62E-05    | 0.000524717 | 0.981037052 |
| DLL3     | -0.774467042 | 0.596299306 | -4.115960544 | 6.83E-05    | 0.000539091 | 0.951163405 |
| SSBP2    | -0.670077862 | 4.658625492 | -4.113433401 | 6.90E-05    | 0.000543013 | 0.941984149 |
| SEPTIN5  | -0.901641615 | 2.960497231 | -4.106928746 | 7.07E-05    | 0.000554681 | 0.918377372 |
| CALR     | -0.653677578 | 9.999773734 | -4.104058197 | 7.15E-05    | 0.000560323 | 0.90796865  |
| SIX3     | -1.286652098 | 0.922184357 | -4.103966295 | 7.15E-05    | 0.000560323 | 0.907635502 |
| AIG1     | -0.90657777  | 2.800833549 | -4.103309115 | 7.17E-05    | 0.000561507 | 0.905253369 |
| NTN1     | -0.834835347 | 2.36018805  | -4.099237792 | 7.28E-05    | 0.000569395 | 0.890502239 |
| SDC3     | 0.879287411  | 1.507383271 | 4.098860454  | 7.29E-05    | 0.000569759 | 0.889135646 |
| LAPTM4B  | -1.291902533 | 4.376953899 | -4.098253881 | 7.31E-05    | 0.000570851 | 0.886939042 |
| ADCY9    | 0.883792084  | 3.463010723 | 4.090864383  | 7.52E-05    | 0.000585304 | 0.86019923  |
| MDGA1    | -0.901519087 | 1.844816551 | -4.079825058 | 7.84E-05    | 0.000605853 | 0.820321188 |
| HLA-F    | 0.783875178  | 4.464092342 | 4.068632275  | 8.18E-05    | 0.000626981 | 0.779973494 |
| GPHN     | -0.711571721 | 2.787123357 | -4.068470645 | 8.19E-05    | 0.00062712  | 0.779391475 |
| DAGLA    | 0.838237277  | 2.025476757 | 4.066528349  | 8.25E-05    | 0.000630525 | 0.772398804 |
| PLA2G4C  | 0.588034413  | 0.996607746 | 4.065751852  | 8.27E-05    | 0.000632139 | 0.769603975 |
| VCL      | 0.613929672  | 5.852328408 | 4.063022141  | 8.36E-05    | 0.000637726 | 0.759782246 |
| TXK      | -0.747374455 | 4.256650874 | -4.062412971 | 8.38E-05    | 0.000638726 | 0.757591094 |
| RASL11A  | 0.60443741   | 1.794539179 | 4.056973191  | 8.55E-05    | 0.000649989 | 0.738035748 |
| CERS4    | -1.012212272 | 3.396296174 | -4.044500546 | 8.96E-05    | 0.000677481 | 0.693274508 |
| ZBTB38   | 0.683413395  | 2.782506436 | 4.04145399   | 9.07E-05    | 0.000683745 | 0.682357358 |
| ISYNA1   | -0.723050334 | 4.911684487 | -4.038566325 | 9.17E-05    | 0.000689545 | 0.672015458 |
| ANKRD18B | -1.202661602 | 1.795131628 | -4.035347432 | 9.28E-05    | 0.000696481 | 0.660494041 |
| PHOSPHO1 | 0.920568889  | 2.673896969 | 4.033827871  | 9.33E-05    | 0.000699683 | 0.655057531 |
| TANC2    | -0.61494863  | 2.503127694 | -4.030086858 | 9.47E-05    | 0.000707462 | 0.641680122 |
| DYRK3    | -0.759505757 | 2.885520274 | -4.028461007 | 9.53E-05    | 0.000710727 | 0.635869274 |
| SERPING1 | -1.177349866 | 5.191094808 | -4.027201523 | 9.57E-05    | 0.000713841 | 0.631369079 |
| LRRC28   | -0.64953701  | 3.402168341 | -4.022523152 | 9.74E-05    | 0.000724832 | 0.614662604 |
| ABCA2    | -0.779475066 | 5.238064219 | -4.019224689 | 9.86E-05    | 0.000733118 | 0.602892834 |
| RNF144B  | 0.89567335   | 3.712354852 | 4.012848257  | 0.000101026 | 0.000748371 | 0.580161309 |
| RALGPS2  | -0.615883034 | 3.944833935 | -4.011767067 | 0.000101438 | 0.000751138 | 0.57630972  |
| SOWAHD   | 0.606297163  | 2.833821014 | 4.009197997  | 0.000102424 | 0.000757572 | 0.567161003 |
| ARMH1    | -1.041062106 | 6.269399984 | -4.007581865 | 0.000103049 | 0.000760718 | 0.561408124 |
| ADAM19   | 0.763966578  | 2.795049451 | 4.002216897  | 0.000105149 | 0.000773026 | 0.542323594 |
| SPTBN1   | -0.653873366 | 5.084002893 | -4.000916814 | 0.000105664 | 0.000775933 | 0.537701866 |
| PTGS2    | 1.072077261  | 3.796980922 | 3.997368128  | 0.000107082 | 0.000784275 | 0.525092409 |
| IL1R2    | 1.216442788  | 1.392422779 | 3.99559538   | 0.000107797 | 0.000788401 | 0.51879661  |
| HSH2D    | -0.797841381 | 7.758139136 | -3.995569947 | 0.000107808 | 0.000788401 | 0.518706303 |

|         |              |             |              |             |             |              |
|---------|--------------|-------------|--------------|-------------|-------------|--------------|
| TBKBP1  | -0.594654681 | 4.541557365 | -3.990776671 | 0.000109765 | 0.000800307 | 0.501694259  |
| OGDHL   | -0.63616557  | 0.498057497 | -3.985712397 | 0.000111869 | 0.000813213 | 0.483737676  |
| KLF2    | 0.876005705  | 6.947316338 | 3.981367699  | 0.000113705 | 0.000824403 | 0.468346674  |
| CLEC4G  | 0.747038805  | 1.395207483 | 3.970934905  | 0.000118232 | 0.000852145 | 0.431442178  |
| TRPS1   | 1.087766171  | 2.871140871 | 3.96378563   | 0.000121433 | 0.000872307 | 0.406196292  |
| LYST    | 0.76466      | 6.006503642 | 3.9598891    | 0.000123212 | 0.000882157 | 0.392451629  |
| PLD4    | 1.1363595    | 4.14240671  | 3.952473636  | 0.000126667 | 0.000904894 | 0.366323433  |
| FZD1    | 0.585790895  | 2.104285752 | 3.952072358  | 0.000126856 | 0.000905916 | 0.36491063   |
| EMB     | 0.595111652  | 7.644681348 | 3.951366412  | 0.00012719  | 0.000907834 | 0.362425442  |
| INTU    | -0.667796857 | 1.331442177 | -3.951268067 | 0.000127237 | 0.000907834 | 0.362079261  |
| MARCKS  | 1.087250515  | 3.66690323  | 3.948441673  | 0.000128584 | 0.000916513 | 0.352132991  |
| TPPP3   | 1.092714244  | 2.138262478 | 3.94821189   | 0.000128694 | 0.000916684 | 0.351324613  |
| KIF1B   | 0.675768677  | 3.468558758 | 3.945054259  | 0.000130216 | 0.000925829 | 0.340219794  |
| PLCH1   | -0.842054572 | 1.413101817 | -3.944681796 | 0.000130396 | 0.000926775 | 0.338910367  |
| GIMAP6  | 0.852911443  | 4.684548374 | 3.929407787  | 0.000138013 | 0.000972387 | 0.285296692  |
| CEP85L  | 0.668580298  | 2.765529398 | 3.924880168  | 0.000140351 | 0.000986004 | 0.26943553   |
| SULT1B1 | 0.781117576  | 3.370757209 | 3.923901368  | 0.000140861 | 0.000988816 | 0.266008483  |
| TTLL10  | -0.670279691 | 0.967940429 | -3.922896602 | 0.000141387 | 0.000991494 | 0.262491221  |
| COL23A1 | -1.396595276 | 3.257935805 | -3.921537317 | 0.000142102 | 0.000995427 | 0.257734063  |
| PRKCA   | 0.873226702  | 3.400145147 | 3.919893978  | 0.00014297  | 0.001000787 | 0.251984512  |
| GPR162  | 0.845952257  | 3.580561944 | 3.918964647  | 0.000143463 | 0.001003157 | 0.248733902  |
| IRX5    | -1.019307077 | 1.109250947 | -3.916157487 | 0.000144962 | 0.001011824 | 0.238918702  |
| SYDE1   | -0.661989846 | 1.161576645 | -3.914823137 | 0.00014568  | 0.001015379 | 0.234255103  |
| IL15    | 0.73050633   | 1.293970894 | 3.910844212  | 0.000147842 | 0.001028233 | 0.220356038  |
| LGALS9  | 0.673502329  | 6.14920072  | 3.903924186  | 0.000151673 | 0.001052249 | 0.196209682  |
| GOLGA8A | -1.029151774 | 4.397500854 | -3.900063292 | 0.000153852 | 0.001065921 | 0.182752318  |
| TUBB4A  | -0.89718488  | 1.257275098 | -3.898882357 | 0.000154524 | 0.00106974  | 0.178638196  |
| MMP15   | -0.876679649 | 1.838019207 | -3.898159731 | 0.000154937 | 0.001071835 | 0.176121208  |
| EIF4E3  | 0.864562159  | 4.232426005 | 3.897848373  | 0.000155115 | 0.001072306 | 0.175036827  |
| ID2     | 0.949637662  | 5.499037713 | 3.894881107  | 0.000156823 | 0.001082574 | 0.164706004  |
| RNASE2  | 1.248633375  | 9.271069258 | 3.893386357  | 0.00015769  | 0.001087017 | 0.159504237  |
| TAFA5   | -0.750047093 | 0.629435339 | -3.891556618 | 0.000158758 | 0.001093989 | 0.153138842  |
| LRATD2  | -0.761152359 | 2.00643579  | -3.889092019 | 0.000160207 | 0.001103193 | 0.144568587  |
| DTNA    | 0.752524537  | 0.95046538  | 3.887999336  | 0.000160853 | 0.001107252 | 0.140770325  |
| CARD9   | 0.809011015  | 4.349421058 | 3.886194173  | 0.000161927 | 0.00111228  | 0.13449726   |
| NCR3LG1 | -0.701038495 | 2.522108946 | -3.879561302 | 0.000165929 | 0.001138169 | 0.11146733   |
| PADI4   | 0.955219514  | 4.937899704 | 3.874965614  | 0.000168758 | 0.001153504 | 0.095528893  |
| ZBED2   | -0.99344832  | 3.000289049 | -3.873580013 | 0.000169619 | 0.001158174 | 0.09072638   |
| NOG     | -1.188504065 | 3.194090998 | -3.873423052 | 0.000169717 | 0.001158435 | 0.090182434  |
| KIF16B  | 0.739956912  | 2.908928276 | 3.872718071  | 0.000170158 | 0.001159577 | 0.087739558  |
| UNC13B  | -0.9558419   | 1.926376316 | -3.871302528 | 0.000171045 | 0.001164231 | 0.082835529  |
| GRIFIN  | -0.759269699 | 2.151746092 | -3.863221981 | 0.000176195 | 0.001193858 | 0.054868287  |
| FKBP14  | -0.719710247 | 2.549013151 | -3.862299562 | 0.000176792 | 0.001196238 | 0.051678679  |
| CLEC4C  | 1.086824589  | 1.212924428 | 3.861214477  | 0.000177497 | 0.001199757 | 0.047927366  |
| AVPR1B  | -0.696578458 | 1.22038524  | -3.854508962 | 0.000181914 | 0.001225892 | 0.024763824  |
| GYPC    | -0.869472856 | 6.100321526 | -3.852984981 | 0.000182932 | 0.001232211 | 0.019503827  |
| CPNE3   | 0.770132956  | 4.862912629 | 3.84594879   | 0.000187704 | 0.00126086  | -0.004760107 |



|          |              |             |              |             |             |              |
|----------|--------------|-------------|--------------|-------------|-------------|--------------|
| PHKA1    | -0.808237719 | 1.245446021 | -3.845073413 | 0.000188305 | 0.001264031 | -0.007776342 |
| ACOT11   | -0.688998294 | 3.701998296 | -3.843562557 | 0.000189349 | 0.001268844 | -0.012980923 |
| AP1S3    | 0.678138316  | 2.66902886  | 3.840533104  | 0.000191457 | 0.001280641 | -0.023411871 |
| PXN      | 0.596228554  | 5.381144489 | 3.840465635  | 0.000191504 | 0.001280641 | -0.023644106 |
| MFSD2B   | -0.805949919 | 2.713887815 | -3.83903565  | 0.000192507 | 0.001286023 | -0.028565465 |
| TMEM176B | 1.3928183    | 3.247649078 | 3.831835974  | 0.000197633 | 0.001312162 | -0.053321381 |
| ABCA7    | 0.708858683  | 5.174789045 | 3.830741513  | 0.000198424 | 0.001316064 | -0.057081429 |
| ADRA2A   | -0.950881962 | 1.54071635  | -3.825218288 | 0.00020246  | 0.001338724 | -0.076043591 |
| MYCN     | -1.28048974  | 3.690663    | -3.820436238 | 0.000206017 | 0.001357172 | -0.092443611 |
| PLA2G4A  | 0.854193382  | 4.231244421 | 3.817116126  | 0.000208521 | 0.001371349 | -0.103820327 |
| SLC44A1  | 0.878722382  | 4.757534426 | 3.815904684  | 0.000209442 | 0.001375547 | -0.107969502 |
| SYNJ2    | -0.686789209 | 3.157471227 | -3.810726628 | 0.000213423 | 0.001397444 | -0.125692475 |
| COCH     | -0.803171539 | 3.131143279 | -3.810303707 | 0.000213751 | 0.001399123 | -0.127139162 |
| TRPM2    | 0.702804514  | 4.831524928 | 3.808617788  | 0.000215064 | 0.001406773 | -0.132904926 |
| GSAP     | 0.595969497  | 3.924007113 | 3.805379218  | 0.000217609 | 0.001420551 | -0.143974984 |
| TIE1     | -0.845733083 | 2.950883905 | -3.804026798 | 0.000218679 | 0.001426185 | -0.148595597 |
| ACSM1    | -1.125178082 | 3.342376946 | -3.803467371 | 0.000219124 | 0.001427092 | -0.150506525 |
| TMEM176A | 1.14890545   | 2.231555427 | 3.801503078  | 0.000220691 | 0.00143682  | -0.157214513 |
| USP41    | -0.687098359 | 1.479656364 | -3.794071216 | 0.000226719 | 0.001470046 | -0.182569061 |
| PAQR8    | 0.619640896  | 3.869196863 | 3.794000342  | 0.000226777 | 0.001470046 | -0.182810663 |
| GPR141   | 0.778709741  | 4.217098093 | 3.784364127  | 0.000234827 | 0.00151667  | -0.215626149 |
| VANGL2   | -0.856060298 | 1.568131374 | -3.783976335 | 0.000235156 | 0.001517791 | -0.216945353 |
| TBL1X    | 0.645456745  | 4.41197325  | 3.783837085  | 0.000235275 | 0.001518052 | -0.217419032 |
| BTBD11   | -0.833881637 | 3.271351937 | -3.780742921 | 0.000237921 | 0.001532588 | -0.227940696 |
| TFRC     | -0.623931209 | 6.667029328 | -3.778626444 | 0.000239748 | 0.001541723 | -0.235133788 |
| ARMC5    | -0.609232091 | 4.455654674 | -3.772812199 | 0.000244834 | 0.001568811 | -0.2548776   |
| TOM1L1   | -0.60090641  | 1.219158872 | -3.772331158 | 0.00024526  | 0.001571019 | -0.256510013 |
| SLC16A2  | -0.760224111 | 0.861410117 | -3.769773795 | 0.000247533 | 0.001580898 | -0.265185634 |
| HCST     | 0.680482521  | 6.63175077  | 3.757446741  | 0.000258774 | 0.00164245  | -0.30693798  |
| SRGN     | 0.982641257  | 11.38826126 | 3.754981562  | 0.00026108  | 0.001656002 | -0.315274521 |
| KCNA5    | 0.650118189  | 0.55076681  | 3.753822184  | 0.000262171 | 0.001661787 | -0.319193694 |
| ASIC1    | -0.669647437 | 1.040589693 | -3.747305134 | 0.000268384 | 0.001691854 | -0.341205945 |
| NDRG2    | 0.648550005  | 1.993951837 | 3.744981478  | 0.000270633 | 0.001702722 | -0.349047    |
| DDIT4L   | -0.796249124 | 0.90757825  | -3.74303461  | 0.000272531 | 0.001712449 | -0.355613598 |
| DCLK2    | -0.658764602 | 1.174903951 | -3.740518754 | 0.000275002 | 0.001724081 | -0.36409528  |
| PLS1     | -0.762121186 | 1.675780465 | -3.739386359 | 0.000276122 | 0.001729984 | -0.36791142  |
| SEMA7A   | -0.748168186 | 2.825752264 | -3.736965875 | 0.000278529 | 0.001743381 | -0.376065272 |
| ZSCAN23  | -0.672067388 | 1.096632294 | -3.733782069 | 0.000281725 | 0.001760556 | -0.386784056 |
| SCNN1D   | -0.590215921 | 2.840228125 | -3.728355916 | 0.000287253 | 0.001788782 | -0.405035139 |
| ZNF626   | -0.758161397 | 1.804012548 | -3.727855829 | 0.000287768 | 0.001790841 | -0.406716129 |
| UGT2B28  | -0.76546874  | 1.216189243 | -3.727692791 | 0.000287936 | 0.001791313 | -0.407264122 |
| AKR1B1   | 0.674632757  | 4.398770547 | 3.71833039   | 0.000297738 | 0.001842284 | -0.438700239 |
| JUP      | -1.009516339 | 6.129561431 | -3.710558496 | 0.000306114 | 0.001887512 | -0.464747573 |
| PLEKHA8  | -0.606161136 | 2.04364349  | -3.707395404 | 0.000309587 | 0.001907715 | -0.47533604  |
| NEXN     | 0.729651235  | 2.352830559 | 3.707162733  | 0.000309844 | 0.00190809  | -0.476114617 |
| SRC      | 0.823420101  | 3.125824526 | 3.706629978  | 0.000310433 | 0.001911113 | -0.477897211 |
| ITPRIPL2 | 0.678198741  | 3.531187896 | 3.706340606  | 0.000310753 | 0.00191248  | -0.47886536  |

|           |              |             |              |             |             |              |
|-----------|--------------|-------------|--------------|-------------|-------------|--------------|
| MSRB3     | -0.725889236 | 5.761998138 | -3.705513005 | 0.000311671 | 0.001916312 | -0.481633924 |
| HIVEP3    | 0.587454532  | 3.378427903 | 3.703033096  | 0.000314438 | 0.001931489 | -0.489926941 |
| COL9A2    | 0.861023703  | 3.427958233 | 3.700482686  | 0.000317307 | 0.001944815 | -0.498451054 |
| PPFIA4    | 0.646896467  | 1.273983735 | 3.691487819  | 0.000327625 | 0.002003008 | -0.528476328 |
| STARD8    | 0.837704209  | 3.45278422  | 3.690807737  | 0.000328417 | 0.002005965 | -0.530744074 |
| CEACAM19  | -0.717425502 | 1.978615498 | -3.687022589 | 0.000332864 | 0.002029937 | -0.543359558 |
| LGR4      | -0.680987636 | 1.207562001 | -3.685786211 | 0.000334328 | 0.002036954 | -0.547478003 |
| TNFAIP3   | 0.614574408  | 5.355255476 | 3.67913605   | 0.000342312 | 0.002079733 | -0.56961092  |
| B3GALNT1  | -0.61937142  | 3.494199047 | -3.674585572 | 0.000347878 | 0.002109598 | -0.584737095 |
| MYO1B     | -0.647830636 | 1.270944236 | -3.673131904 | 0.000349674 | 0.00211983  | -0.58956602  |
| TGFB1I1   | -0.585915298 | 1.863124898 | -3.669943042 | 0.000353645 | 0.002139903 | -0.600153651 |
| HOXB2     | 1.257992195  | 3.181611844 | 3.669381814  | 0.000354348 | 0.002143492 | -0.602016262 |
| RTP4      | 0.744406393  | 2.912683516 | 3.663710548  | 0.000361529 | 0.002178804 | -0.620825223 |
| MOK       | -0.604464867 | 1.809779604 | -3.661377028 | 0.000364524 | 0.002193454 | -0.628557581 |
| STXBP1    | -0.728918148 | 1.702174164 | -3.643343991 | 0.000388469 | 0.002323174 | -0.688177182 |
| GABBR1    | 1.078841159  | 3.468308797 | 3.643078185  | 0.000388833 | 0.002324635 | -0.689054185 |
| BCL3      | 0.65294287   | 4.891348244 | 3.642880225  | 0.000389104 | 0.002324878 | -0.689707301 |
| MT1E      | 0.79629686   | 1.58692208  | 3.64128123   | 0.000391301 | 0.002335087 | -0.694981713 |
| TNFSF9    | 0.782727947  | 2.29438405  | 3.639160147  | 0.000394233 | 0.002347546 | -0.701975374 |
| NDFIP1    | 0.763653703  | 5.279553457 | 3.637338191  | 0.000396769 | 0.002359034 | -0.707980105 |
| SASH1     | 0.611847477  | 0.656065402 | 3.636941368  | 0.000397323 | 0.002360887 | -0.709287612 |
| CCDC188   | -0.610206048 | 2.569436446 | -3.636566962 | 0.000397847 | 0.002363277 | -0.710521153 |
| TSPAN16   | 0.632939839  | 2.333898415 | 3.631618181  | 0.000404829 | 0.002394521 | -0.726816006 |
| THBS1     | 1.290388367  | 3.197779175 | 3.630220292  | 0.000406822 | 0.002405579 | -0.73141557  |
| HMGN5     | -0.66348358  | 3.312352424 | -3.627348863 | 0.000410946 | 0.002425992 | -0.740859094 |
| CD52      | 1.087179433  | 7.030646135 | 3.624219221  | 0.000415485 | 0.002447136 | -0.751144907 |
| TRAF5     | -0.618819404 | 4.128676608 | -3.617739045 | 0.000425035 | 0.002494323 | -0.772419533 |
| CPXM1     | -0.8271127   | 6.970110228 | -3.614798956 | 0.000429435 | 0.002513328 | -0.782061716 |
| SH3D21    | -0.602717707 | 3.11421584  | -3.612816595 | 0.000432427 | 0.00252858  | -0.788559374 |
| GABARAPL1 | 0.632842078  | 4.156290138 | 3.61176007   | 0.000434029 | 0.0025364   | -0.792021197 |
| TBC1D16   | -0.682240918 | 2.497811255 | -3.610310169 | 0.000436238 | 0.00254701  | -0.79677062  |
| ZNF721    | -0.686750443 | 3.680593962 | -3.610102839 | 0.000436554 | 0.002548094 | -0.79744964  |
| NLGN2     | -0.632901757 | 2.067602948 | -3.609062264 | 0.000438147 | 0.002555089 | -0.800857122 |
| DOCK3     | -0.720360123 | 1.164095548 | -3.603626175 | 0.000446555 | 0.002600227 | -0.81864519  |
| GSTM2     | -0.667366079 | 3.408183972 | -3.601862976 | 0.000449315 | 0.002611608 | -0.824410064 |
| HELZ2     | 0.692389093  | 3.37990549  | 3.600855535  | 0.000450899 | 0.002620033 | -0.827702913 |
| PTGFR     | 0.619666403  | 0.644411715 | 3.596096921  | 0.000458453 | 0.002655206 | -0.843246417 |
| BST2      | 0.59465449   | 7.070199666 | 3.594031247  | 0.000461769 | 0.002672734 | -0.849988496 |
| OR2W3     | -0.737092445 | 3.611189127 | -3.591266215 | 0.000466243 | 0.002694712 | -0.859008235 |
| FKBP5     | 0.60614032   | 6.11079954  | 3.58827902   | 0.000471123 | 0.002719685 | -0.868746313 |
| DLL1      | -0.709838937 | 1.247493019 | -3.583863563 | 0.000478425 | 0.002752551 | -0.883128313 |
| TRO       | -0.85868445  | 1.48178273  | -3.574082926 | 0.00049498  | 0.002835532 | -0.914934175 |
| BEND6     | -0.794394213 | 1.326802914 | -3.571754769 | 0.000498999 | 0.002851005 | -0.922494678 |
| RGS3      | -0.589680336 | 3.462897387 | -3.566530453 | 0.000508131 | 0.002896819 | -0.939445544 |
| SCN9A     | -1.064357314 | 1.226376003 | -3.566486593 | 0.000508209 | 0.002896819 | -0.939587768 |
| COL2A1    | -0.8137677   | 0.759519545 | -3.559659647 | 0.000520382 | 0.002954954 | -0.961707683 |
| SYTL1     | -0.587733151 | 5.611400073 | -3.554577026 | 0.000529622 | 0.003000423 | -0.978153264 |

|          |              |             |              |             |             |              |
|----------|--------------|-------------|--------------|-------------|-------------|--------------|
| CCL23    | 1.196547157  | 2.730429215 | 3.547364063  | 0.000543002 | 0.003062847 | -1.001458799 |
| STAP1    | -0.674011993 | 4.332773869 | -3.5353212   | 0.000566053 | 0.003168987 | -1.040283399 |
| PLTP     | -0.659553232 | 5.006503034 | -3.534739767 | 0.000567189 | 0.00317241  | -1.042155115 |
| TIMP1    | 0.75221611   | 7.216851635 | 3.53395815   | 0.00056872  | 0.003179341 | -1.044670857 |
| MTCL1    | -0.60567344  | 1.310708706 | -3.531094017 | 0.000574361 | 0.003204434 | -1.05388555  |
| TWIST1   | -0.640019967 | 0.560463643 | -3.528876306 | 0.000578765 | 0.003222538 | -1.061016305 |
| OR2L5    | -0.623493579 | 1.344645844 | -3.52845824  | 0.000579599 | 0.003225335 | -1.06236013  |
| CDCA7    | -0.770820332 | 5.705821933 | -3.521969564 | 0.000592686 | 0.003289576 | -1.083200408 |
| STK32B   | -0.918865557 | 2.871828833 | -3.520516112 | 0.000595656 | 0.00330149  | -1.087864266 |
| CTSW     | -1.060631025 | 7.182552098 | -3.514206723 | 0.000608709 | 0.003364236 | -1.10809154  |
| AK5      | 0.819643068  | 1.976428208 | 3.514088547  | 0.000608956 | 0.003364646 | -1.108470116 |
| HBEGF    | 0.969520914  | 4.001547146 | 3.5136394    | 0.000609896 | 0.003367926 | -1.109908856 |
| ZNF354C  | -0.649977987 | 2.017775396 | -3.50589414  | 0.000626318 | 0.003440064 | -1.134695208 |
| MYO1C    | 0.609329707  | 2.470039854 | 3.505653885  | 0.000626834 | 0.003441926 | -1.135463352 |
| A4GALT   | -0.820683914 | 1.735869847 | -3.505313526 | 0.000627566 | 0.003442119 | -1.13655147  |
| ZNF718   | -0.708286248 | 3.456205514 | -3.504455012 | 0.000629415 | 0.003450257 | -1.139295733 |
| BAHCC1   | -0.940448334 | 5.7857261   | -3.503085973 | 0.000632374 | 0.003459721 | -1.143670754 |
| GCH1     | 0.728033831  | 4.423953165 | 3.502214604  | 0.000634265 | 0.003468049 | -1.146454644 |
| C2       | 0.843389682  | 1.535116029 | 3.499058835  | 0.000641156 | 0.003495905 | -1.15653205  |
| ECHDC3   | 0.661980562  | 2.124525787 | 3.487542081  | 0.000666906 | 0.003617054 | -1.193245198 |
| EVPL     | -1.056305071 | 2.310778271 | -3.485740413 | 0.000671021 | 0.00363836  | -1.198979517 |
| OSM      | -0.769367046 | 3.850349015 | -3.481871906 | 0.000679938 | 0.00368158  | -1.211283859 |
| SLC24A3  | -1.111901982 | 2.735013431 | -3.481192859 | 0.000681515 | 0.00368704  | -1.213442498 |
| SLC27A2  | -0.686475216 | 3.911035762 | -3.476134156 | 0.00069337  | 0.003739737 | -1.229512788 |
| ANKRD22  | 0.734135492  | 2.133950583 | 3.473144007  | 0.000700468 | 0.003770428 | -1.239002684 |
| LTK      | -1.072905919 | 3.495519566 | -3.472457414 | 0.000702107 | 0.00377744  | -1.241180784 |
| LAMC3    | -0.6258243   | 0.867619632 | -3.47116387  | 0.000705205 | 0.003790966 | -1.245283364 |
| GOLGA8B  | -0.895469602 | 3.711290853 | -3.468213564 | 0.000712321 | 0.003821826 | -1.254635766 |
| RHOH     | -0.5972725   | 3.814512814 | -3.465351751 | 0.000719287 | 0.003850708 | -1.263701351 |
| PLAAT5   | -0.675005534 | 0.676961559 | -3.463562766 | 0.000723674 | 0.003865913 | -1.269365311 |
| ZFPM1    | -0.60514183  | 3.276688699 | -3.459679122 | 0.000733285 | 0.003910585 | -1.281652653 |
| PTGER1   | -0.633475112 | 1.337479036 | -3.457763296 | 0.00073807  | 0.003931794 | -1.28770987  |
| SORBS3   | 0.706167299  | 3.553110195 | 3.452447447  | 0.000751501 | 0.003993506 | -1.304502277 |
| WASF1    | -0.872050399 | 4.650835299 | -3.448724203 | 0.000761045 | 0.004033208 | -1.316250988 |
| ST3GAL4  | -0.638656653 | 4.944078384 | -3.446201421 | 0.000767576 | 0.004060081 | -1.324205661 |
| TFR2     | -0.805162608 | 3.502509664 | -3.443481779 | 0.000774676 | 0.004082101 | -1.332775642 |
| CD96     | -1.220247454 | 5.686555911 | -3.442717891 | 0.000776681 | 0.004089346 | -1.335181755 |
| SERPINB6 | 0.856067146  | 5.624853555 | 3.439154004  | 0.000786101 | 0.004133352 | -1.3464015   |
| LOXL4    | -0.760236396 | 2.402937218 | -3.430245113 | 0.000810121 | 0.00423675  | -1.374406023 |
| LPAR1    | 0.733072239  | 1.597047974 | 3.42958709   | 0.000811922 | 0.00424161  | -1.376472082 |
| KCTD15   | -0.686411873 | 3.55893941  | -3.428561189 | 0.000814737 | 0.004253537 | -1.379692543 |
| PTGDR2   | -0.758003503 | 2.228842356 | -3.426239954 | 0.000821142 | 0.004273714 | -1.3869763   |
| LPAR5    | -0.682736831 | 2.771396118 | -3.424122956 | 0.000827024 | 0.004296285 | -1.39361561  |
| ARHGAP4  | 0.715143974  | 6.870642265 | 3.421883195  | 0.00083329  | 0.004326528 | -1.400636208 |
| DIPK1B   | -0.824862653 | 4.657268312 | -3.410207657 | 0.000866683 | 0.00447959  | -1.437171594 |
| SCUBE1   | 0.955950114  | 1.953840674 | 3.408428467  | 0.000871881 | 0.004505257 | -1.442729946 |
| CIITA    | 0.952201926  | 5.634339601 | 3.404016537  | 0.000884896 | 0.004558976 | -1.456502782 |

|          |              |             |              |             |             |              |
|----------|--------------|-------------|--------------|-------------|-------------|--------------|
| GGT1     | 0.686372954  | 3.058957359 | 3.403951775  | 0.000885088 | 0.004558976 | -1.45670484  |
| CD33     | 0.673926882  | 5.67655106  | 3.401269955  | 0.00089309  | 0.004594111 | -1.465069347 |
| ACCS     | -0.620083799 | 5.216566894 | -3.400348163 | 0.000895856 | 0.004604688 | -1.467943113 |
| CACNA2D4 | 0.832624532  | 3.664286755 | 3.398159081  | 0.000902456 | 0.00463372  | -1.474765167 |
| PODXL2   | -0.836663969 | 2.556256237 | -3.398072767 | 0.000902718 | 0.004633839 | -1.47503408  |
| SH2D3C   | 0.624336849  | 5.395263747 | 3.3979081    | 0.000903216 | 0.004635175 | -1.475547089 |
| CYSTM1   | 0.612775123  | 3.2275145   | 3.391161223  | 0.000923864 | 0.004726183 | -1.496548684 |
| ADAMTS3  | -0.724236264 | 0.989517068 | -3.388122688 | 0.000933307 | 0.004766971 | -1.505995612 |
| SMARCD3  | 0.706699005  | 3.307489448 | 3.383018787  | 0.000949373 | 0.0048376   | -1.521847929 |
| CD69     | -0.880085256 | 6.592090314 | -3.382778008 | 0.000950137 | 0.004839444 | -1.522595277 |
| KCNK6    | 0.632939499  | 3.561846924 | 3.382669789  | 0.000950481 | 0.004839444 | -1.522931161 |
| IGSF9B   | -0.707362138 | 1.386928831 | -3.381092875 | 0.000955502 | 0.004858654 | -1.52782447  |
| DST      | -0.696914698 | 1.940013917 | -3.380564406 | 0.00095719  | 0.004864412 | -1.529463931 |
| PTGR1    | -0.624871632 | 2.188644271 | -3.375158807 | 0.000974621 | 0.004934713 | -1.546221335 |
| PLA2G7   | 0.641380899  | 1.0873972   | 3.368202108  | 0.000997491 | 0.005024897 | -1.567754146 |
| HYAL3    | -0.662866482 | 4.370707    | -3.366069919 | 0.001004601 | 0.005049805 | -1.574346384 |
| IQSEC3   | -0.882155424 | 2.325788061 | -3.363540436 | 0.001013097 | 0.005082459 | -1.582162432 |
| ATP1B1   | -0.680995959 | 4.400641163 | -3.362310818 | 0.001017251 | 0.005098043 | -1.585960149 |
| EPB41L2  | 0.920907304  | 3.406046479 | 3.35950241   | 0.001026799 | 0.005141921 | -1.594629647 |
| JAM3     | -0.610374474 | 2.86170811  | -3.355330902 | 0.001041136 | 0.005197667 | -1.607495801 |
| P2RX5    | -0.607771753 | 3.049827086 | -3.353286864 | 0.001048229 | 0.005223699 | -1.613795326 |
| MANSC1   | 0.616583871  | 1.859654071 | 3.343024987  | 0.00108453  | 0.005377058 | -1.645372747 |
| CCDC102A | -0.625462803 | 2.587155784 | -3.338198641 | 0.001102007 | 0.005449821 | -1.660196093 |
| KIAA1217 | -0.638393216 | 0.850982508 | -3.337522589 | 0.001104475 | 0.005460644 | -1.662271042 |
| PRODH    | -0.708495375 | 1.304075704 | -3.336225731 | 0.001109226 | 0.005481346 | -1.66625039  |
| ATXN1    | 0.635030102  | 3.163401902 | 3.336113741  | 0.001109637 | 0.005481986 | -1.666593964 |
| FAM180B  | -0.735291246 | 2.566146029 | -3.330342505 | 0.001131019 | 0.005575885 | -1.684286479 |
| SLAMF7   | 0.72606755   | 3.272258668 | 3.329053416  | 0.001135847 | 0.005594426 | -1.688234839 |
| COL4A5   | -1.270920186 | 2.475411776 | -3.326793662 | 0.001144357 | 0.005630641 | -1.695153157 |
| NDFIP2   | -0.633112765 | 1.580092693 | -3.325135241 | 0.00115064  | 0.005656819 | -1.70022796  |
| DMXL2    | 0.85390282   | 5.466347361 | 3.323881136  | 0.001155414 | 0.005672994 | -1.704064136 |
| NFIL3    | 0.704275838  | 5.427649714 | 3.322873     | 0.001159264 | 0.005688168 | -1.707147034 |
| STAR     | -0.64233683  | 3.802772077 | -3.322008076 | 0.001162577 | 0.005701548 | -1.70979136  |
| FBLN1    | -0.686733034 | 0.894773634 | -3.319815299 | 0.001171015 | 0.005734262 | -1.71649273  |
| ZNF300   | -0.61935164  | 2.376962239 | -3.315618694 | 0.001187325 | 0.005802449 | -1.729307636 |
| EDA2R    | -0.784204915 | 2.526304305 | -3.31486004  | 0.001190296 | 0.005814049 | -1.731622834 |
| C3AR1    | 0.883624825  | 5.340604467 | 3.313513392  | 0.001195587 | 0.005832572 | -1.735731323 |
| MAML2    | 0.632866722  | 3.097252776 | 3.312910662  | 0.001197963 | 0.005841231 | -1.73756974  |
| TMIGD2   | -1.090223026 | 3.539304104 | -3.307245443 | 0.001220504 | 0.005935941 | -1.754835719 |
| RTN1     | 0.599054698  | 0.898680262 | 3.306112542  | 0.001225059 | 0.005952473 | -1.758285493 |
| SLC29A2  | -0.686388301 | 2.857766256 | -3.305913083 | 0.001225863 | 0.005954891 | -1.758892756 |
| ZNF662   | -0.797261118 | 2.834679325 | -3.302367151 | 0.001240232 | 0.006009689 | -1.769683417 |
| ARMCX1   | -0.624620121 | 3.42662247  | -3.300457848 | 0.001248034 | 0.006039974 | -1.775489594 |
| NNMT     | -0.609641803 | 1.293469789 | -3.299382788 | 0.001252447 | 0.006056813 | -1.778757594 |
| NR4A2    | 0.858396241  | 5.150946496 | 3.298816256  | 0.001254778 | 0.00606658  | -1.780479396 |
| VWA1     | -0.618783253 | 1.440964319 | -3.294485181 | 0.001272737 | 0.006147295 | -1.79363414  |
| PLAU     | -0.62934851  | 3.820487481 | -3.290634444 | 0.001288904 | 0.006209973 | -1.805317714 |

|           |              |             |              |             |             |              |
|-----------|--------------|-------------|--------------|-------------|-------------|--------------|
| CLIP4     | 0.74952      | 3.102890036 | 3.285093494  | 0.001312506 | 0.006308066 | -1.822109344 |
| ARHGAP5   | -0.813003398 | 3.32960725  | -3.284891688 | 0.001313373 | 0.006309117 | -1.822720458 |
| HNRNPLL   | 0.76049761   | 2.904487968 | 3.281366837  | 0.001328605 | 0.006375995 | -1.833389392 |
| KLF11     | 0.784425853  | 4.067129356 | 3.279599399  | 0.001336305 | 0.006408206 | -1.838735388 |
| TRIM58    | -0.678041298 | 4.712087492 | -3.276594828 | 0.00134949  | 0.006457113 | -1.847817772 |
| HOXB4     | 1.221235793  | 3.062580435 | 3.273789307  | 0.001361911 | 0.006498968 | -1.856292106 |
| TNFRSF25  | -0.682691081 | 3.337614165 | -3.270194714 | 0.001377982 | 0.006554761 | -1.867140932 |
| TNFRSF18  | -0.8515358   | 1.787986613 | -3.262457307 | 0.001413176 | 0.006699245 | -1.890458962 |
| DSC2      | -0.917948655 | 1.648103244 | -3.257499146 | 0.001436167 | 0.006793343 | -1.905376667 |
| CARMIL1   | 0.614478107  | 1.908409503 | 3.257060393  | 0.001438218 | 0.006799196 | -1.906695828 |
| ZNF358    | -0.605172292 | 3.901636617 | -3.230551586 | 0.001567344 | 0.007309013 | -1.986117873 |
| HOXB3     | 1.39512226   | 3.63238762  | 3.228342284  | 0.001578579 | 0.007356118 | -1.992712215 |
| AKR1C3    | -0.650370055 | 3.623506845 | -3.22731287  | 0.00158384  | 0.007373569 | -1.995783508 |
| DACH1     | 0.9909765    | 3.149712919 | 3.220038766  | 0.00162148  | 0.007525402 | -2.017462339 |
| COL14A1   | -0.622536729 | 1.121359659 | -3.216249875 | 0.001641415 | 0.007608845 | -2.028737806 |
| CLEC2B    | 0.747239405  | 5.137752506 | 3.200500211  | 0.001726748 | 0.007943857 | -2.075486597 |
| DOC2B     | -0.812453587 | 1.270610463 | -3.199010514 | 0.001735029 | 0.007973145 | -2.079898261 |
| IGLL1     | -1.334905862 | 6.01328752  | -3.197149757 | 0.001745426 | 0.008009989 | -2.085406343 |
| ZNF257    | -0.627238635 | 2.263021889 | -3.197109558 | 0.001745651 | 0.008009989 | -2.085525306 |
| GPC6      | -0.648885546 | 0.652427234 | -3.179004587 | 0.001849885 | 0.008422731 | -2.13897513  |
| PHACTR3   | 0.64690485   | 0.739498618 | 3.17280157   | 0.001886907 | 0.008579256 | -2.157228207 |
| AFF2      | -0.825016451 | 2.184508503 | -3.170400382 | 0.001901423 | 0.008631137 | -2.164285797 |
| EPSTI1    | 0.778142099  | 2.661008052 | 3.169756352  | 0.001905333 | 0.008640827 | -2.166177959 |
| SCML2     | -0.597383856 | 4.209285307 | -3.168663318 | 0.001911988 | 0.008664947 | -2.169388545 |
| SERPINB10 | 0.947547588  | 3.449507579 | 3.159185385  | 0.001970602 | 0.008889179 | -2.197188528 |
| STON2     | -1.007857394 | 3.673383176 | -3.152792818 | 0.002011073 | 0.009046576 | -2.215898518 |
| OBSL1     | -0.861991308 | 3.252662719 | -3.151621223 | 0.002018574 | 0.009074023 | -2.219324067 |
| RAB7B     | -0.915928365 | 4.760865621 | -3.149636042 | 0.002031342 | 0.009120885 | -2.225125918 |
| ZNF90     | -0.682819565 | 2.100727804 | -3.146935039 | 0.002048835 | 0.009180365 | -2.23301479  |
| PALD1     | -0.770276113 | 3.008189849 | -3.143713304 | 0.002069883 | 0.009259752 | -2.242416996 |
| CAVIN3    | 0.635042307  | 0.941463796 | 3.14095826   | 0.002088041 | 0.009321697 | -2.250450679 |
| UNCX      | -0.885497188 | 0.81513349  | -3.135527904 | 0.002124265 | 0.009459542 | -2.266267878 |
| P3H3      | -0.647824745 | 1.525808491 | -3.133774615 | 0.002136085 | 0.009503477 | -2.271369735 |
| GXYLT2    | -0.657665636 | 0.921449953 | -3.126545174 | 0.002185468 | 0.009687747 | -2.292380679 |
| LAT2      | 0.648271589  | 6.505965975 | 3.122742326  | 0.002211868 | 0.009784712 | -2.303416195 |
| CEACAM3   | 0.615254147  | 1.080493125 | 3.114901611  | 0.002267235 | 0.00997973  | -2.32613283  |
| AGRN      | -0.716809303 | 3.325018785 | -3.105125385 | 0.002338068 | 0.010233648 | -2.35438842  |
| TNNT1     | 0.796656182  | 1.50051106  | 3.103450584  | 0.002350406 | 0.010276096 | -2.359221326 |
| FSCN1     | -0.761356634 | 5.694196    | -3.101772097 | 0.002362832 | 0.010318832 | -2.364062619 |
| SOX18     | -0.618316395 | 1.330773369 | -3.08924535  | 0.002457509 | 0.010641549 | -2.40012258  |
| NR4A1     | 0.851529981  | 3.42797839  | 3.088434172  | 0.002463759 | 0.010656757 | -2.402453336 |
| APBA1     | -0.629815815 | 0.90610745  | -3.088069987 | 0.00246657  | 0.010666545 | -2.403499576 |
| SPATC1L   | -0.86254811  | 3.297581519 | -3.075837712 | 0.002562725 | 0.011013833 | -2.438579024 |
| RAB11FIP5 | 0.605606748  | 1.325299792 | 3.07482825   | 0.002570813 | 0.011043715 | -2.441468576 |
| BEX4      | -0.592272262 | 5.877174841 | -3.068495921 | 0.002622091 | 0.011219413 | -2.459575993 |
| ADAM8     | 0.762815067  | 5.263469026 | 3.068172703  | 0.002624733 | 0.011226738 | -2.460499378 |
| ZBTB16    | -0.704841493 | 4.115980247 | -3.066069327 | 0.00264199  | 0.011277283 | -2.466506349 |

|          |              |             |              |             |             |              |
|----------|--------------|-------------|--------------|-------------|-------------|--------------|
| NETO1    | -0.631164549 | 0.646035055 | -3.065449167 | 0.002647098 | 0.011296608 | -2.468276767 |
| ATP8B4   | -0.607941877 | 6.143161683 | -3.064890018 | 0.002651712 | 0.011308856 | -2.46987275  |
| DYSF     | 0.859673264  | 4.462922695 | 3.064247374  | 0.002657023 | 0.011329024 | -2.471706739 |
| KIAA1211 | -0.75627754  | 2.35159748  | -3.063414914 | 0.002663918 | 0.011348476 | -2.474081938 |
| MEST     | -0.955610442 | 5.134202781 | -3.061390713 | 0.002680752 | 0.011402718 | -2.479855119 |
| NRP1     | 0.707251803  | 1.411776292 | 3.061205287  | 0.002682299 | 0.011406805 | -2.480383802 |
| OR2L2    | -0.589382462 | 1.655025492 | -3.055710131 | 0.002728522 | 0.011562943 | -2.496038981 |
| TNS1     | -0.60438718  | 3.160243055 | -3.047659425 | 0.002797571 | 0.011819524 | -2.518930789 |
| MEF2C    | 0.709698859  | 4.916349615 | 3.047574048  | 0.002798312 | 0.011820088 | -2.519173274 |
| POGLUT2  | -0.67839613  | 1.910666561 | -3.046942156 | 0.0028038   | 0.011838133 | -2.520967775 |
| CEACAM4  | 0.724684069  | 4.750793339 | 3.044020358  | 0.002829309 | 0.011925136 | -2.529261169 |
| MARCKSL1 | -0.628632383 | 6.111103551 | -3.041806582 | 0.002848779 | 0.011991616 | -2.535540291 |
| MMP25    | 0.632860018  | 3.091352037 | 3.037640441  | 0.002885756 | 0.012104493 | -2.547346354 |
| CAPG     | 0.789793226  | 6.121946485 | 3.035594303  | 0.002904078 | 0.012169112 | -2.553139598 |
| SELENOP  | -0.901706216 | 3.157296277 | -3.01994282  | 0.003047824 | 0.012689486 | -2.597341879 |
| ABCB1    | -0.810697227 | 2.38853912  | -3.016534535 | 0.003079985 | 0.012801474 | -2.60694116  |
| LRG1     | 0.722333669  | 3.325351741 | 3.007620829  | 0.003165579 | 0.013076681 | -2.632001754 |
| IGFBP2   | -1.069404894 | 3.598587067 | -3.007609901 | 0.003165686 | 0.013076681 | -2.632032437 |
| MFGE8    | -0.730576074 | 3.694619358 | -3.001759213 | 0.003223056 | 0.0132686   | -2.648446412 |
| MX1      | 0.792704549  | 3.124276432 | 2.998568366  | 0.003254747 | 0.013369727 | -2.657386564 |
| SYCP2L   | -0.632263529 | 1.015778967 | -2.984420832 | 0.003398747 | 0.013859938 | -2.696925732 |
| SPIB     | 0.656713688  | 2.103675986 | 2.980370197  | 0.003441044 | 0.014015749 | -2.708216399 |
| PPARGC1A | 0.624112493  | 0.889990421 | 2.980348034  | 0.003441277 | 0.014015749 | -2.708278138 |
| RUBCNL   | 0.666849081  | 2.384711312 | 2.979047488  | 0.003454961 | 0.014063911 | -2.711900403 |
| YPEL4    | -0.5924277   | 1.848303647 | -2.977525802 | 0.003471035 | 0.014122169 | -2.716136836 |
| PARP8    | 0.588105169  | 5.256291548 | 2.976638186  | 0.003480442 | 0.014154527 | -2.718607123 |
| TMEM51   | 0.738623595  | 2.779503402 | 2.971356257  | 0.003536913 | 0.014336248 | -2.733293783 |
| ADAMTSL4 | 0.653363088  | 5.039732256 | 2.96971684   | 0.003554611 | 0.014395991 | -2.737847642 |
| BAG3     | 0.65050649   | 1.951949149 | 2.966706845  | 0.003587318 | 0.014499078 | -2.746202898 |
| OLR1     | 0.60405058   | 1.181428371 | 2.956036054  | 0.00370551  | 0.01490168  | -2.775763773 |
| RGS10    | 0.630188441  | 5.368390318 | 2.951440139  | 0.003757511 | 0.015085858 | -2.788467034 |
| CPNE7    | -0.891921161 | 2.695989104 | -2.951019717 | 0.003762301 | 0.015101975 | -2.789628235 |
| GATM     | -0.748201199 | 1.948833415 | -2.947070968 | 0.003807567 | 0.015261637 | -2.800527576 |
| SLC16A9  | -0.727813919 | 1.694195762 | -2.946322152 | 0.003816207 | 0.015286823 | -2.802593023 |
| SALL4    | -0.638499447 | 1.054159873 | -2.944340843 | 0.003839155 | 0.01534852  | -2.808055821 |
| SLC18A2  | -0.821891862 | 2.198108042 | -2.937998041 | 0.003913476 | 0.015593006 | -2.825522404 |
| HAL      | 0.754744285  | 4.330075439 | 2.930712936  | 0.004000468 | 0.015887572 | -2.845543255 |
| TNFRSF4  | -0.836884046 | 2.225036141 | -2.926763514 | 0.004048367 | 0.016041788 | -2.856378852 |
| ZNF595   | -0.805699434 | 2.182410457 | -2.92346361  | 0.004088792 | 0.016175308 | -2.865422638 |
| TREM2    | 0.620050165  | 1.131619772 | 2.921486023  | 0.004113195 | 0.016245744 | -2.870838177 |
| P2RY2    | 0.688303064  | 4.103501454 | 2.920427499  | 0.004126312 | 0.016294245 | -2.873735583 |
| LAMC1    | -0.96378293  | 2.380417352 | -2.913907771 | 0.004207954 | 0.016576272 | -2.891561208 |
| PXDN     | -1.08278517  | 1.715984747 | -2.912671581 | 0.0042236   | 0.016621083 | -2.89493715  |
| TMEM121B | 0.73773769   | 2.213717132 | 2.900928233  | 0.004374916 | 0.017085262 | -2.926944746 |
| RETREG1  | -0.636726388 | 2.140024477 | -2.900776153 | 0.004376908 | 0.017089611 | -2.927358511 |
| NME8     | 0.586816428  | 3.519589316 | 2.887660104  | 0.00455185  | 0.017646269 | -2.96297185  |
| TOX      | -0.647307024 | 3.88739124  | -2.883704114 | 0.004605859 | 0.017826877 | -2.973685546 |

|          |              |             |              |             |             |              |
|----------|--------------|-------------|--------------|-------------|-------------|--------------|
| STARD9   | -0.66050941  | 2.826181571 | -2.87405811  | 0.004740021 | 0.018233013 | -2.999754986 |
| FGFR1    | -0.844328848 | 2.744647083 | -2.87043713  | 0.004791301 | 0.018405069 | -3.009521291 |
| STAB1    | 1.289247435  | 6.411409774 | 2.870365759  | 0.004792317 | 0.018405069 | -3.00971368  |
| LBP      | -0.638516329 | 1.065092764 | -2.858301885 | 0.004966883 | 0.018929799 | -3.042172839 |
| LPO      | -1.063440016 | 3.69212961  | -2.854619481 | 0.005021316 | 0.019084924 | -3.052056784 |
| ZNF727   | -0.760302385 | 1.481359932 | -2.854204965 | 0.005027477 | 0.019103171 | -3.053168684 |
| IRX1     | -0.86982698  | 1.24955302  | -2.853895349 | 0.005032084 | 0.019110763 | -3.053999109 |
| TRAT1    | -0.681829153 | 3.178373106 | -2.851356996 | 0.005069997 | 0.019213659 | -3.060804253 |
| COL24A1  | -0.638264564 | 3.950625816 | -2.850888236 | 0.005077027 | 0.019236554 | -3.062060381 |
| ATP10A   | 0.831066066  | 2.886096562 | 2.849855083  | 0.005092552 | 0.019284115 | -3.064828265 |
| EREG     | 1.23646027   | 2.976147968 | 2.847431002  | 0.00512915  | 0.019396793 | -3.071319063 |
| ECE1     | 0.602626898  | 3.4831055   | 2.840752824  | 0.005231222 | 0.019720956 | -3.089175597 |
| ARTN     | 0.773800034  | 3.043498168 | 2.840086487  | 0.005241508 | 0.019752079 | -3.090955264 |
| XK       | -0.754355698 | 2.448518363 | -2.836287056 | 0.005300511 | 0.019947386 | -3.101095829 |
| F2R      | -0.699883405 | 4.166835941 | -2.833099758 | 0.005350475 | 0.020081049 | -3.109593399 |
| SH3BGR12 | -0.592097777 | 1.931223576 | -2.832847208 | 0.005354452 | 0.020092102 | -3.110266356 |
| FOXO1    | 0.642612727  | 3.636399279 | 2.829994545  | 0.005399566 | 0.020230179 | -3.11786402  |
| LHX6     | -0.681160756 | 1.146463466 | -2.823901768 | 0.005497085 | 0.020518876 | -3.134068649 |
| NYNRIN   | -0.660054904 | 3.708938249 | -2.816479865 | 0.005618049 | 0.020887895 | -3.153766627 |
| EBF3     | -0.589640605 | 1.144859796 | -2.815744881 | 0.00563016  | 0.020916935 | -3.155714808 |
| PTK2     | 0.734526255  | 1.83990499  | 2.809169188  | 0.005739571 | 0.021262528 | -3.173124636 |
| GGT5     | -0.736429415 | 2.879328843 | -2.806186325 | 0.005789839 | 0.021391735 | -3.181010212 |
| SDC4     | 0.625605602  | 2.737607391 | 2.805234933  | 0.005805957 | 0.021443142 | -3.183523782 |
| GRB10    | -0.635201567 | 4.299281878 | -2.790114652 | 0.006067659 | 0.022228284 | -3.223370184 |
| ADGRG1   | -0.868332864 | 4.137731711 | -2.787841594 | 0.006107918 | 0.022358932 | -3.229343881 |
| PRR16    | 0.733155741  | 1.153693386 | 2.77599451   | 0.006321711 | 0.022977712 | -3.260408719 |
| HOXB7    | 0.645939905  | 1.161021691 | 2.773644019  | 0.00636493  | 0.023108497 | -3.266558122 |
| ADRA2C   | -0.66966146  | 0.935869611 | -2.771387171 | 0.00640668  | 0.023234065 | -3.272458187 |
| TSPOAP1  | -0.654800954 | 5.985814107 | -2.765951791 | 0.006508255 | 0.023523523 | -3.28665039  |
| EGFL7    | -0.862286408 | 5.570095359 | -2.765265183 | 0.00652119  | 0.023557148 | -3.288441419 |
| TMCC2    | -0.7756229   | 2.896690797 | -2.761758678 | 0.006587614 | 0.023757407 | -3.297582044 |
| LHFPL6   | -0.653102135 | 2.477433964 | -2.735022797 | 0.007114657 | 0.025329534 | -3.366937326 |
| TRIM10   | -0.669983106 | 1.824556382 | -2.730015203 | 0.007217529 | 0.025642832 | -3.379860766 |
| BEX3     | -1.021809406 | 4.16084159  | -2.725902932 | 0.007303016 | 0.025852247 | -3.390457825 |
| ASS1     | -0.727031318 | 1.255468962 | -2.721301486 | 0.007399761 | 0.026119961 | -3.402298594 |
| TMTC2    | 0.612550907  | 3.325428293 | 2.719648538  | 0.007434797 | 0.026224605 | -3.406547728 |
| MMP19    | 0.693119126  | 2.295819826 | 2.719565367  | 0.007436564 | 0.026226083 | -3.40676147  |
| ADAMTS1  | -0.662382932 | 1.05159075  | -2.718695284 | 0.00745507  | 0.026258039 | -3.408997155 |
| KLF9     | 0.597374079  | 3.230904468 | 2.714701543  | 0.007540554 | 0.026508097 | -3.419250928 |
| GABRE    | -1.011044624 | 1.220181643 | -2.706556793 | 0.00771765  | 0.027006919 | -3.440120612 |
| AFF3     | 0.653073301  | 3.505241375 | 2.705151179  | 0.007748592 | 0.027085971 | -3.443716625 |
| ALDH2    | 0.639773112  | 2.725193719 | 2.696452673  | 0.007942587 | 0.027625153 | -3.465933148 |
| AIF1L    | -0.879032156 | 3.062323124 | -2.696177951 | 0.007948784 | 0.027636831 | -3.466633767 |
| HOXB5    | 1.005939164  | 2.123626153 | 2.693767758  | 0.008003348 | 0.02776206  | -3.472777692 |
| PRAME    | -1.125799281 | 2.004672261 | -2.68974979  | 0.008095065 | 0.028025255 | -3.483009158 |
| SELL     | 0.712787048  | 8.182077092 | 2.687371073  | 0.00814981  | 0.028174686 | -3.489059964 |
| PTGIR    | 0.707484434  | 2.96723982  | 2.684999484  | 0.008204725 | 0.028319254 | -3.495087875 |

|          |              |             |              |             |             |              |
|----------|--------------|-------------|--------------|-------------|-------------|--------------|
| CST7     | -0.86549141  | 7.705449987 | -2.684368419 | 0.008219394 | 0.028349771 | -3.496691064 |
| HBB      | -1.327046385 | 9.703705774 | -2.683041525 | 0.008250315 | 0.028441297 | -3.500060875 |
| CD24     | -0.777534837 | 2.384555366 | -2.670030598 | 0.008559133 | 0.029318909 | -3.533024808 |
| FLNB     | 0.721972375  | 4.791199567 | 2.663745049  | 0.008712035 | 0.029724996 | -3.548898259 |
| ZNF135   | -0.61993949  | 2.062446038 | -2.656834771 | 0.008882982 | 0.03021021  | -3.566310753 |
| RUNX3    | -0.5918302   | 5.399924886 | -2.653386332 | 0.008969418 | 0.03047127  | -3.574984967 |
| GFI1     | -0.663150223 | 5.958782307 | -2.641099248 | 0.009283608 | 0.031354591 | -3.605809864 |
| RBPMS2   | -0.764313911 | 2.149465048 | -2.636513011 | 0.009403405 | 0.031681139 | -3.61728259  |
| GBP1     | 0.697998995  | 2.531349265 | 2.634237763  | 0.009463353 | 0.031839012 | -3.622967612 |
| TGM5     | -0.585407427 | 1.127525146 | -2.63007269  | 0.009573987 | 0.032155643 | -3.633363212 |
| HOXB6    | 1.022205673  | 2.072474022 | 2.623779218  | 0.009743372 | 0.032623196 | -3.64904307  |
| ME3      | -0.590322638 | 3.522845287 | -2.621974622 | 0.009792437 | 0.032746692 | -3.653532904 |
| HBA2     | -1.264211892 | 7.210575017 | -2.620788582 | 0.009824806 | 0.032822442 | -3.65648226  |
| MYO5C    | -0.711113531 | 3.023256683 | -2.618528203 | 0.009886762 | 0.032984122 | -3.662099885 |
| COBLL1   | 0.634732588  | 1.981388628 | 2.618079126  | 0.009899113 | 0.03300835  | -3.663215438 |
| MED12L   | -0.673835249 | 2.127656439 | -2.617008332 | 0.009928619 | 0.033084061 | -3.665874708 |
| ZNF532   | 0.592131046  | 1.594009767 | 2.609198801  | 0.010146219 | 0.033670775 | -3.685239763 |
| POU4F1   | -0.953087863 | 0.93443827  | -2.606232156 | 0.01023     | 0.033902553 | -3.692582426 |
| KCNK17   | -0.920635967 | 3.565807905 | -2.595537755 | 0.010537213 | 0.034760836 | -3.718989483 |
| TP53INP2 | 0.743971857  | 4.191302918 | 2.593475512  | 0.010597401 | 0.034935697 | -3.724070422 |
| DLC1     | -0.649370626 | 2.652653113 | -2.592339043 | 0.010630701 | 0.035033606 | -3.726868892 |
| MMP2     | -0.972204682 | 3.786392557 | -2.585739624 | 0.010825941 | 0.035544301 | -3.743097635 |
| RASGRP3  | -0.606613057 | 3.537339474 | -2.584958812 | 0.010849253 | 0.035591111 | -3.745015279 |
| CRISPLD1 | -0.605088213 | 2.462416263 | -2.584210684 | 0.010871632 | 0.035646496 | -3.746852162 |
| RHEX     | -0.814867359 | 5.979941335 | -2.580562629 | 0.01098135  | 0.035976576 | -3.755802392 |
| SULT1C4  | -0.618027779 | 2.575292191 | -2.579526645 | 0.01101269  | 0.036060397 | -3.758342025 |
| HBM      | -0.89034167  | 2.946183295 | -2.576008604 | 0.011119713 | 0.036349676 | -3.766959362 |
| ANO7     | -0.831334124 | 2.672652679 | -2.565701631 | 0.011438666 | 0.037248402 | -3.792144937 |
| CFH      | -0.667544879 | 1.901724829 | -2.554931781 | 0.011780698 | 0.038168206 | -3.818364232 |
| CROCC2   | 0.712388136  | 1.467934263 | 2.551113862  | 0.011904133 | 0.038487197 | -3.82763508  |
| COL5A1   | -0.706465996 | 1.635796742 | -2.546132964 | 0.012066913 | 0.038916494 | -3.8397111   |
| ZNF608   | -0.693716957 | 2.604334456 | -2.539067422 | 0.012301244 | 0.039508533 | -3.856804682 |
| NRXN2    | -0.695978147 | 3.537083538 | -2.532597364 | 0.012519393 | 0.040057118 | -3.872419945 |
| SUCNR1   | -0.712157814 | 4.773387365 | -2.52432746  | 0.012803271 | 0.040751005 | -3.892326591 |
| SPRY2    | -0.683434865 | 4.097991068 | -2.523033678 | 0.012848199 | 0.04086727  | -3.895435549 |
| HBA1     | -1.01978923  | 4.083901644 | -2.518876275 | 0.012993528 | 0.041248623 | -3.905416016 |
| SERPINE1 | -0.675320465 | 2.85918471  | -2.513813338 | 0.013172497 | 0.041694339 | -3.917550222 |
| TCEAL9   | -0.81038849  | 3.783111195 | -2.508338478 | 0.013368506 | 0.042211768 | -3.930646781 |
| NPDC1    | -0.902886304 | 4.190072767 | -2.503885858 | 0.013529835 | 0.042634636 | -3.941278931 |
| IKZF2    | -0.752450525 | 2.828191736 | -2.501053739 | 0.013633353 | 0.042874119 | -3.948032669 |
| CLDN10   | -0.627349086 | 1.193738077 | -2.493073146 | 0.013928872 | 0.043648285 | -3.967026652 |
| ME1      | 0.622970344  | 1.68275917  | 2.482224163  | 0.014339778 | 0.044734223 | -3.992759104 |
| GPR153   | -0.641758961 | 2.280817935 | -2.471051405 | 0.01477422  | 0.045874656 | -4.019152964 |
| S100B    | -0.872722216 | 3.067827632 | -2.462487997 | 0.015115103 | 0.04671789  | -4.039309376 |
| GUCY1A1  | -0.778064545 | 4.864443092 | -2.461077089 | 0.015171935 | 0.046856982 | -4.042624242 |
| HBG1     | -0.717232002 | 1.465428326 | -2.455976115 | 0.015378994 | 0.04740618  | -4.054594337 |
| NXF3     | -0.785060756 | 2.594140845 | -2.45124631  | 0.01557323  | 0.047840875 | -4.06567324  |



|          |              |             |              |             |             |              |
|----------|--------------|-------------|--------------|-------------|-------------|--------------|
| ABLM1    | -0.614820217 | 3.562666107 | -2.451225306 | 0.015574098 | 0.047840875 | -4.065722394 |
| SIGLEC12 | 0.728206913  | 3.247483145 | 2.446711849  | 0.015761492 | 0.048309756 | -4.07627632  |
| KLF1     | -0.696012952 | 3.720762642 | -2.44533787  | 0.015818936 | 0.048432425 | -4.079485613 |
| HLA-DOA  | 0.737490358  | 3.8670778   | 2.441548501  | 0.015978328 | 0.048820579 | -4.088328178 |
| TRH      | -1.29260723  | 3.452692483 | -2.439956851 | 0.016045703 | 0.049003355 | -4.092038598 |
| DNAJC12  | -0.63099998  | 2.026617617 | -2.438803612 | 0.016094677 | 0.049106682 | -4.094725627 |
| HBD      | -0.925731644 | 6.009335817 | -2.437737505 | 0.016140069 | 0.049198896 | -4.097208609 |
| CAMP     | 0.632549486  | 1.662817657 | 2.437335024  | 0.016157236 | 0.049235798 | -4.098145738 |
| PHGDH    | -0.591318686 | 3.427439866 | -2.435384591 | 0.016240654 | 0.049435809 | -4.102685088 |
| GOS2     | 0.79767595   | 2.389957301 | 2.432863151  | 0.016349061 | 0.049719133 | -4.108548465 |

|          | Immune_limma_res |             |             |          |             |             |
|----------|------------------|-------------|-------------|----------|-------------|-------------|
|          | logFC            | AveExpr     | t           | P. Value | adj. P. Val | B           |
| SECTM1   | 2.876106612      | 2.843133595 | 10.98780659 | 3.09E-20 | 6.01E-16    | 35.32840235 |
| LILRA5   | 3.499344636      | 3.447420747 | 10.8058952  | 8.75E-20 | 6.49E-16    | 34.31871645 |
| IFI30    | 2.243877766      | 2.217785321 | 10.78249614 | 1.00E-19 | 6.49E-16    | 34.18886269 |
| FFAR2    | 1.924415359      | 1.744588345 | 10.58157551 | 3.16E-19 | 1.54E-15    | 33.07420191 |
| CD300E   | 3.960842538      | 3.451381237 | 10.46986922 | 5.98E-19 | 2.33E-15    | 32.4548593  |
| SLC15A3  | 2.391095525      | 2.565575558 | 10.34829452 | 1.20E-18 | 3.79E-15    | 31.78122112 |
| HSPA6    | 1.698577735      | 1.778903607 | 10.32546408 | 1.36E-18 | 3.79E-15    | 31.65477558 |
| ABI3     | 2.126102187      | 3.334619586 | 10.28194239 | 1.75E-18 | 4.25E-15    | 31.413787   |
| CXCL16   | 2.289323384      | 2.879244845 | 10.19264135 | 2.91E-18 | 6.29E-15    | 30.91955124 |
| CHST15   | 2.654274754      | 3.220297497 | 10.13005823 | 4.16E-18 | 8.09E-15    | 30.57339806 |
| LILRB2   | 3.119554166      | 4.319628714 | 9.935694197 | 1.26E-17 | 2.22E-14    | 29.49964235 |
| MAFB     | 3.368709057      | 3.802632868 | 9.816376294 | 2.48E-17 | 3.87E-14    | 28.84158765 |
| LILRA6   | 2.565615967      | 2.622608198 | 9.808609342 | 2.59E-17 | 3.87E-14    | 28.7987845  |
| GPBAR1   | 2.009515949      | 2.655034188 | 9.732623179 | 3.98E-17 | 5.54E-14    | 28.38025444 |
| LILRB1   | 2.339831674      | 3.486813013 | 9.677519621 | 5.44E-17 | 7.06E-14    | 28.07701111 |
| CD14     | 3.871728649      | 4.724960659 | 9.661432524 | 5.96E-17 | 7.25E-14    | 27.98852536 |
| CLEC7A   | 3.039213333      | 3.767697805 | 9.622600922 | 7.43E-17 | 8.51E-14    | 27.77501988 |
| SGK1     | 2.059289103      | 2.824965197 | 9.602323155 | 8.33E-17 | 9.01E-14    | 27.66357637 |
| MARCO    | 2.531908266      | 1.82324443  | 9.58756791  | 9.06E-17 | 9.28E-14    | 27.58250517 |
| IL10RA   | 2.092360018      | 4.86945179  | 9.532002069 | 1.24E-16 | 1.17E-13    | 27.27736977 |
| SLC11A1  | 2.874875232      | 3.668955998 | 9.524991191 | 1.29E-16 | 1.17E-13    | 27.23888906 |
| TNFRSF1B | 2.475204045      | 6.132103482 | 9.520051699 | 1.33E-16 | 1.17E-13    | 27.21178019 |
| SLC7A7   | 2.475429566      | 3.926749247 | 9.458476469 | 1.88E-16 | 1.59E-13    | 26.87402745 |
| SLC26A11 | 1.352759547      | 1.902615127 | 9.443496356 | 2.05E-16 | 1.65E-13    | 26.791911   |
| CARD16   | 1.297662399      | 4.021903748 | 9.437106699 | 2.12E-16 | 1.65E-13    | 26.75689122 |
| TNFRSF8  | 1.422771612      | 1.516936533 | 9.424463877 | 2.28E-16 | 1.70E-13    | 26.68761108 |
| LILRB3   | 2.290558883      | 3.663464921 | 9.390400799 | 2.76E-16 | 1.99E-13    | 26.50102828 |
| APOBEC3A | 2.619402454      | 3.09209265  | 9.339355168 | 3.68E-16 | 2.55E-13    | 26.2216351  |
| OASL     | 1.484859076      | 1.806095849 | 9.333299071 | 3.81E-16 | 2.55E-13    | 26.18850496 |
| GIMAP1   | 1.478947708      | 3.270798128 | 9.327817258 | 3.93E-16 | 2.55E-13    | 26.15851968 |
| ZMYND15  | 1.132651041      | 0.843572233 | 9.299626329 | 4.61E-16 | 2.89E-13    | 26.0043652  |
| C5AR1    | 3.166549272      | 4.493231657 | 9.28187968  | 5.09E-16 | 3.09E-13    | 25.90736474 |
| LRRC25   | 2.71175368       | 4.601091751 | 9.221023325 | 7.17E-16 | 4.23E-13    | 25.57498769 |

|           |              |              |              |           |           |              |
|-----------|--------------|--------------|--------------|-----------|-----------|--------------|
| AQP9      | 2. 752587985 | 2. 724124409 | 9. 175399217 | 9. 26E-16 | 5. 30E-13 | 25. 32606985 |
| ZFP36L1   | 1. 873505686 | 5. 058603032 | 9. 062140095 | 1. 75E-15 | 9. 57E-13 | 24. 7091797  |
| HMOX1     | 2. 478381143 | 3. 843200019 | 9. 059951664 | 1. 77E-15 | 9. 57E-13 | 24. 69727495 |
| FCN1      | 3. 295605015 | 5. 620795074 | 8. 990398798 | 2. 61E-15 | 1. 37E-12 | 24. 31922605 |
| CLEC1A    | 0. 726903819 | 0. 519701502 | 8. 982783211 | 2. 73E-15 | 1. 40E-12 | 24. 27786907 |
| FGD2      | 2. 351807474 | 3. 63376478  | 8. 869951966 | 5. 12E-15 | 2. 56E-12 | 23. 66601809 |
| CLEC4A    | 2. 188674627 | 3. 669721727 | 8. 845676739 | 5. 87E-15 | 2. 85E-12 | 23. 53460416 |
| IL4I1     | 1. 240616913 | 1. 333752756 | 8. 809394212 | 7. 18E-15 | 3. 41E-12 | 23. 33834132 |
| KCNH3     | 1. 119748954 | 1. 615784539 | 8. 796503638 | 7. 72E-15 | 3. 57E-12 | 23. 26865706 |
| GIMAP4    | 2. 276011177 | 4. 412642555 | 8. 764076251 | 9. 24E-15 | 4. 18E-12 | 23. 09346523 |
| IER3      | 1. 98294561  | 2. 800883896 | 8. 760244685 | 9. 44E-15 | 4. 18E-12 | 23. 07277488 |
| BCL6      | 2. 042574986 | 4. 502893014 | 8. 749674466 | 1. 00E-14 | 4. 26E-12 | 23. 01570709 |
| LFNG      | 1. 764059588 | 4. 239876057 | 8. 748436968 | 1. 01E-14 | 4. 26E-12 | 23. 009027   |
| POU2F2    | 1. 764134574 | 5. 268235315 | 8. 741887151 | 1. 05E-14 | 4. 33E-12 | 22. 97367443 |
| SLC43A2   | 1. 808586808 | 3. 388876315 | 8. 737614756 | 1. 07E-14 | 4. 34E-12 | 22. 95061762 |
| FTH1      | 1. 186933903 | 7. 943376372 | 8. 592337364 | 2. 40E-14 | 9. 52E-12 | 22. 1682419  |
| CASP5     | 1. 342713612 | 0. 987997287 | 8. 583654543 | 2. 52E-14 | 9. 79E-12 | 22. 12158545 |
| VNN3      | 1. 784675766 | 1. 52826499  | 8. 567869877 | 2. 75E-14 | 1. 05E-11 | 22. 03679874 |
| NUAK2     | 1. 371103618 | 2. 625451277 | 8. 550407975 | 3. 02E-14 | 1. 13E-11 | 21. 94304967 |
| OAS1      | 1. 691168517 | 3. 819790372 | 8. 543715234 | 3. 14E-14 | 1. 15E-11 | 21. 90713097 |
| PSAP      | 1. 48385787  | 9. 466183206 | 8. 530877201 | 3. 37E-14 | 1. 21E-11 | 21. 83825213 |
| SGSH      | 1. 807377047 | 2. 999590106 | 8. 526778988 | 3. 45E-14 | 1. 22E-11 | 21. 81627003 |
| LRP1      | 2. 865027682 | 4. 014806711 | 8. 519163312 | 3. 59E-14 | 1. 25E-11 | 21. 77542822 |
| ZNF703    | 1. 589686476 | 1. 678454142 | 8. 515234639 | 3. 67E-14 | 1. 25E-11 | 21. 75436304 |
| DOK2      | 1. 690590163 | 4. 973141898 | 8. 497056708 | 4. 06E-14 | 1. 36E-11 | 21. 65692808 |
| THEMIS2   | 1. 498021072 | 6. 067769506 | 8. 489270578 | 4. 24E-14 | 1. 39E-11 | 21. 61521077 |
| JAML      | 2. 432953775 | 4. 187177829 | 8. 487332017 | 4. 29E-14 | 1. 39E-11 | 21. 60482574 |
| FGR       | 2. 672443753 | 6. 247745024 | 8. 4626617   | 4. 91E-14 | 1. 56E-11 | 21. 47272019 |
| GIMAP8    | 2. 028924701 | 3. 311034213 | 8. 46035885  | 4. 97E-14 | 1. 56E-11 | 21. 46039407 |
| SNN       | 1. 043657948 | 4. 624059473 | 8. 438183204 | 5. 62E-14 | 1. 74E-11 | 21. 34174425 |
| HK3       | 3. 09018065  | 4. 349380146 | 8. 431625604 | 5. 83E-14 | 1. 77E-11 | 21. 3066743  |
| ADGRE3    | 1. 935894554 | 1. 892010387 | 8. 417559652 | 6. 30E-14 | 1. 89E-11 | 21. 23147492 |
| VNN2      | 2. 410388191 | 3. 797260043 | 8. 385464692 | 7. 51E-14 | 2. 21E-11 | 21. 06001827 |
| LRRK2     | 2. 218027931 | 2. 52631382  | 8. 382976734 | 7. 62E-14 | 2. 21E-11 | 21. 04673476 |
| IL21R     | 1. 03841482  | 1. 63030608  | 8. 353879497 | 8. 94E-14 | 2. 56E-11 | 20. 89146285 |
| SLC9A9    | 1. 604030108 | 2. 325691058 | 8. 336004288 | 9. 86E-14 | 2. 78E-11 | 20. 79615049 |
| IL10      | 1. 504560595 | 1. 073275893 | 8. 27802952  | 1. 36E-13 | 3. 77E-11 | 20. 4874246  |
| MSR1      | 1. 79811697  | 1. 175253943 | 8. 253754816 | 1. 55E-13 | 4. 19E-11 | 20. 35834263 |
| SIGLEC9   | 2. 489080379 | 3. 413608415 | 8. 205702204 | 2. 01E-13 | 5. 37E-11 | 20. 1031494  |
| MAP3K3    | 0. 881007538 | 5. 553838743 | 8. 199110861 | 2. 09E-13 | 5. 49E-11 | 20. 06817924 |
| EHBP1L1   | 1. 071767168 | 6. 17191974  | 8. 189373452 | 2. 20E-13 | 5. 72E-11 | 20. 01653311 |
| CCR5      | 1. 870425212 | 2. 615431007 | 8. 131908491 | 3. 02E-13 | 7. 72E-11 | 19. 71212351 |
| EGR2      | 2. 0468937   | 2. 422666244 | 8. 109490107 | 3. 41E-13 | 8. 58E-11 | 19. 5935442  |
| ARHGEF10L | 2. 160294115 | 2. 02562405  | 8. 106061606 | 3. 47E-13 | 8. 58E-11 | 19. 57541847 |
| RGS2      | 2. 302341581 | 5. 67184092  | 8. 10540697  | 3. 48E-13 | 8. 58E-11 | 19. 57195782 |
| MEFV      | 2. 537416752 | 3. 011967381 | 8. 096659127 | 3. 65E-13 | 8. 89E-11 | 19. 52572182 |
| RRAS      | 1. 474531401 | 4. 442522319 | 8. 086873307 | 3. 85E-13 | 9. 26E-11 | 19. 47401808 |

|          |               |              |               |           |           |              |
|----------|---------------|--------------|---------------|-----------|-----------|--------------|
| NLRP12   | 2. 328491468  | 3. 048773692 | 8. 074446656  | 4. 12E-13 | 9. 69E-11 | 19. 40838953 |
| COTL1    | 1. 487510141  | 6. 377000959 | 8. 07415702   | 4. 13E-13 | 9. 69E-11 | 19. 40686026 |
| FPR1     | 2. 851314174  | 3. 767089206 | 8. 067273082  | 4. 29E-13 | 9. 84E-11 | 19. 37051831 |
| CEBPB    | 1. 631678004  | 5. 441123409 | 8. 066809989  | 4. 30E-13 | 9. 84E-11 | 19. 36807388 |
| IQSEC1   | 1. 328272023  | 5. 009006179 | 8. 043333109  | 4. 89E-13 | 1. 11E-10 | 19. 24420952 |
| MVP      | 1. 189007662  | 5. 112826719 | 8. 035769025  | 5. 09E-13 | 1. 13E-10 | 19. 20432563 |
| LILRA1   | 2. 29933395   | 4. 152441497 | 8. 034561547  | 5. 12E-13 | 1. 13E-10 | 19. 19795995 |
| TFEB     | 1. 434062855  | 3. 251001517 | 8. 030992768  | 5. 22E-13 | 1. 14E-10 | 19. 17914753 |
| TYMP     | 1. 957831782  | 5. 257839545 | 8. 019156501  | 5. 57E-13 | 1. 20E-10 | 19. 11677307 |
| CYTIP    | 1. 300272867  | 5. 522631923 | 8. 006784634  | 5. 96E-13 | 1. 27E-10 | 19. 05160755 |
| MYD88    | 1. 025308717  | 6. 81040454  | 7. 987241073  | 6. 63E-13 | 1. 40E-10 | 18. 94873296 |
| NFKB2    | 1. 183468738  | 4. 401280987 | 7. 960057522  | 7. 68E-13 | 1. 61E-10 | 18. 80577793 |
| TNFAIP2  | 2. 093921963  | 5. 991487958 | 7. 952279684  | 8. 01E-13 | 1. 65E-10 | 18. 76490444 |
| NCF1     | 2. 289867606  | 3. 496803105 | 7. 951210015  | 8. 06E-13 | 1. 65E-10 | 18. 75928422 |
| STX11    | 1. 87725268   | 5. 098080974 | 7. 948252853  | 8. 19E-13 | 1. 66E-10 | 18. 74374808 |
| CDC42SE1 | 0. 822019692  | 6. 876851489 | 7. 942543926  | 8. 44E-13 | 1. 69E-10 | 18. 71376027 |
| ECE1     | 1. 500159527  | 3. 4831055   | 7. 939238129  | 8. 59E-13 | 1. 71E-10 | 18. 69639884 |
| PRKACA   | 0. 820114198  | 4. 735777721 | 7. 923230654  | 9. 37E-13 | 1. 82E-10 | 18. 61236423 |
| CTSS     | 1. 815842478  | 7. 500201545 | 7. 920419983  | 9. 52E-13 | 1. 83E-10 | 18. 59761481 |
| PLD2     | 1. 505243881  | 2. 516458522 | 7. 917952851  | 9. 64E-13 | 1. 84E-10 | 18. 58466958 |
| GNGT2    | 1. 081425559  | 1. 510502407 | 7. 89295254   | 1. 10E-12 | 2. 09E-10 | 18. 45356667 |
| SLC8A1   | 1. 557240903  | 1. 386920272 | 7. 881319109  | 1. 18E-12 | 2. 20E-10 | 18. 39260755 |
| PPARD    | 1. 190932237  | 3. 356654163 | 7. 869356728  | 1. 25E-12 | 2. 32E-10 | 18. 3299562  |
| ARAP1    | 1. 066073277  | 6. 048627619 | 7. 826444851  | 1. 58E-12 | 2. 90E-10 | 18. 10547608 |
| KLF2     | 1. 5829523    | 6. 947316338 | 7. 818219407  | 1. 65E-12 | 3. 01E-10 | 18. 062495   |
| ARHGAP30 | 0. 839580523  | 6. 895900002 | 7. 789228296  | 1. 93E-12 | 3. 48E-10 | 17. 91112928 |
| CYTH1    | 0. 796631661  | 5. 703419056 | 7. 780848937  | 2. 02E-12 | 3. 61E-10 | 17. 86741594 |
| LY96     | 1. 838628962  | 3. 912163435 | 7. 776624772  | 2. 07E-12 | 3. 66E-10 | 17. 84538555 |
| BCL2A1   | 1. 924189606  | 4. 49759975  | 7. 774499894  | 2. 09E-12 | 3. 67E-10 | 17. 83430519 |
| SLC16A6  | 1. 218840603  | 1. 403485118 | 7. 763422976  | 2. 22E-12 | 3. 86E-10 | 17. 77656075 |
| CX3CR1   | 2. 638922887  | 4. 945756337 | 7. 746507259  | 2. 43E-12 | 4. 19E-10 | 17. 68843392 |
| FKBP7    | -0. 699273818 | 2. 889541209 | -7. 706891147 | 3. 01E-12 | 5. 11E-10 | 17. 48230852 |
| EFHD2    | 1. 035070792  | 7. 37431481  | 7. 706133238  | 3. 02E-12 | 5. 11E-10 | 17. 47836871 |
| TLR8     | 2. 795085956  | 3. 367211846 | 7. 673171305  | 3. 60E-12 | 6. 04E-10 | 17. 30715812 |
| ZBP1     | 0. 973985311  | 1. 63652197  | 7. 664656404  | 3. 77E-12 | 6. 27E-10 | 17. 26297289 |
| CD1D     | 2. 499987362  | 3. 613320376 | 7. 660856126  | 3. 85E-12 | 6. 35E-10 | 17. 24325833 |
| TNFSF10  | 1. 60129605   | 4. 758249823 | 7. 658180192  | 3. 90E-12 | 6. 38E-10 | 17. 22937859 |
| RASSF5   | 0. 82948105   | 5. 323003895 | 7. 617721608  | 4. 85E-12 | 7. 81E-10 | 17. 01973961 |
| GPRIN3   | 1. 453654011  | 2. 606896478 | 7. 616703654  | 4. 87E-12 | 7. 81E-10 | 17. 01447023 |
| NLRP1    | 1. 468579423  | 5. 010788772 | 7. 614404047  | 4. 93E-12 | 7. 81E-10 | 17. 0025674  |
| KIAA0513 | 1. 642814103  | 3. 393287331 | 7. 614298387  | 4. 94E-12 | 7. 81E-10 | 17. 00202054 |
| CCR1     | 2. 275214569  | 4. 37543277  | 7. 60591157   | 5. 16E-12 | 8. 10E-10 | 16. 95862152 |
| GPR132   | 1. 312688292  | 3. 868632396 | 7. 593800669  | 5. 51E-12 | 8. 57E-10 | 16. 89598263 |
| SCIMP    | 2. 067884814  | 3. 739953669 | 7. 564764915  | 6. 43E-12 | 9. 91E-10 | 16. 74595685 |
| SLC2A6   | 1. 549211257  | 3. 273328709 | 7. 563605542  | 6. 47E-12 | 9. 91E-10 | 16. 73997087 |
| EPHB2    | 0. 933574543  | 0. 60080451  | 7. 539412199  | 7. 36E-12 | 1. 12E-09 | 16. 61513606 |
| GPR65    | 1. 445434869  | 2. 970233865 | 7. 524643788  | 7. 96E-12 | 1. 20E-09 | 16. 5390065  |

|          |             |             |             |          |          |             |
|----------|-------------|-------------|-------------|----------|----------|-------------|
| SH3BP2   | 1.07073743  | 5.368334244 | 7.518552917 | 8.22E-12 | 1.23E-09 | 16.50762509 |
| UNC119   | 1.002060583 | 3.949262843 | 7.505802783 | 8.80E-12 | 1.31E-09 | 16.44196488 |
| NADK     | 0.980336917 | 5.62475828  | 7.496357263 | 9.25E-12 | 1.36E-09 | 16.39334989 |
| TLR7     | 2.098411501 | 2.431583542 | 7.482295896 | 9.97E-12 | 1.45E-09 | 16.3210208  |
| ZFP36    | 1.364151527 | 8.546543736 | 7.482268885 | 9.97E-12 | 1.45E-09 | 16.32088191 |
| DEDD2    | 0.739759191 | 5.100145368 | 7.47809864  | 1.02E-11 | 1.47E-09 | 16.29944093 |
| LGALS3   | 1.927958109 | 4.435377141 | 7.471996372 | 1.05E-11 | 1.50E-09 | 16.26807483 |
| SLC46A2  | 1.288713571 | 1.531478475 | 7.471404206 | 1.06E-11 | 1.50E-09 | 16.26503158 |
| ADAP2    | 1.933056762 | 3.31793606  | 7.46489514  | 1.09E-11 | 1.54E-09 | 16.23158634 |
| ITGAM    | 2.008338645 | 5.560710542 | 7.45506626  | 1.15E-11 | 1.61E-09 | 16.18110426 |
| CEACAM3  | 1.344525638 | 1.080493125 | 7.445410643 | 1.21E-11 | 1.69E-09 | 16.131537   |
| BCL3     | 1.235457278 | 4.891348244 | 7.443686838 | 1.22E-11 | 1.69E-09 | 16.12269043 |
| VDR      | 1.619527055 | 2.954289216 | 7.433151673 | 1.29E-11 | 1.77E-09 | 16.06864114 |
| SYTL3    | 1.250573039 | 3.348075545 | 7.419653643 | 1.39E-11 | 1.89E-09 | 15.99943463 |
| FCGR3A   | 2.288128579 | 4.109797777 | 7.412877139 | 1.44E-11 | 1.95E-09 | 15.96470887 |
| GIMAP7   | 1.898097109 | 4.336643265 | 7.410039178 | 1.46E-11 | 1.96E-09 | 15.9501696  |
| APOA2    | 1.520232575 | 2.219255462 | 7.404944941 | 1.50E-11 | 1.99E-09 | 15.92407655 |
| ADM      | 1.37748795  | 1.610964733 | 7.40459026  | 1.51E-11 | 1.99E-09 | 15.92226011 |
| PXN      | 1.071235285 | 5.381144489 | 7.400192041 | 1.54E-11 | 2.03E-09 | 15.89973818 |
| GBP1     | 1.776193353 | 2.531349265 | 7.389309992 | 1.63E-11 | 2.12E-09 | 15.84403707 |
| CREB5    | 1.532163176 | 2.288509032 | 7.388620918 | 1.64E-11 | 2.12E-09 | 15.84051104 |
| TMCC3    | 1.01391748  | 1.22545433  | 7.379149016 | 1.72E-11 | 2.21E-09 | 15.79205591 |
| RCN3     | 1.548642159 | 3.033534293 | 7.378283654 | 1.73E-11 | 2.21E-09 | 15.78763022 |
| CFP      | 1.621059789 | 5.439347941 | 7.374917121 | 1.76E-11 | 2.24E-09 | 15.77041484 |
| SH3TC1   | 1.516119549 | 3.768880312 | 7.37289196  | 1.78E-11 | 2.25E-09 | 15.76006029 |
| NINJ1    | 1.480182424 | 4.521351628 | 7.369567915 | 1.81E-11 | 2.25E-09 | 15.74306706 |
| ASGR2    | 2.010363536 | 2.342679339 | 7.369524032 | 1.81E-11 | 2.25E-09 | 15.74284274 |
| CRTAM    | 0.913366019 | 1.59680086  | 7.368169605 | 1.82E-11 | 2.25E-09 | 15.7359195  |
| RARG     | 1.020766485 | 2.52109688  | 7.367668668 | 1.83E-11 | 2.25E-09 | 15.73335906 |
| SIGLEC7  | 1.824946791 | 2.466187909 | 7.362719897 | 1.88E-11 | 2.30E-09 | 15.70806805 |
| RNF19B   | 0.748072913 | 5.062641531 | 7.360027056 | 1.90E-11 | 2.32E-09 | 15.69430894 |
| PLEKHO2  | 0.866933765 | 5.426521826 | 7.357101608 | 1.93E-11 | 2.34E-09 | 15.67936359 |
| CD101    | 1.817341915 | 2.635624261 | 7.35111376  | 2.00E-11 | 2.40E-09 | 15.64878056 |
| TLR5     | 1.900361146 | 2.382632377 | 7.327305913 | 2.26E-11 | 2.70E-09 | 15.52727964 |
| C9orf72  | 1.242885011 | 4.692087057 | 7.295365188 | 2.68E-11 | 3.18E-09 | 15.36452136 |
| LIPN     | 1.636371804 | 1.935434975 | 7.292774165 | 2.71E-11 | 3.19E-09 | 15.35133099 |
| CSK      | 0.744050633 | 6.565500723 | 7.29250106  | 2.72E-11 | 3.19E-09 | 15.34994079 |
| PLEC     | 1.465050097 | 5.86894994  | 7.288184032 | 2.78E-11 | 3.24E-09 | 15.32796823 |
| MOB3A    | 0.837172358 | 6.726632632 | 7.27553049  | 2.97E-11 | 3.44E-09 | 15.26359531 |
| FOLR2    | 1.423976452 | 1.528494562 | 7.274180163 | 2.99E-11 | 3.45E-09 | 15.25672841 |
| GBP2     | 1.4409376   | 4.547173252 | 7.267344049 | 3.10E-11 | 3.55E-09 | 15.22197225 |
| C19orf38 | 1.688806771 | 4.756748242 | 7.259616519 | 3.23E-11 | 3.68E-09 | 15.18269997 |
| CAMK2D   | 1.322534589 | 2.243508408 | 7.23453748  | 3.68E-11 | 4.17E-09 | 15.05536274 |
| CD300C   | 2.039927364 | 4.224754744 | 7.231861472 | 3.74E-11 | 4.20E-09 | 15.04178614 |
| SLC6A12  | 0.95283803  | 0.789451266 | 7.229850175 | 3.78E-11 | 4.22E-09 | 15.03158327 |
| TBC1D9   | 1.514527601 | 2.592882436 | 7.222648812 | 3.92E-11 | 4.36E-09 | 14.99506195 |
| PILRA    | 1.531441381 | 5.048142853 | 7.208409424 | 4.23E-11 | 4.67E-09 | 14.92289182 |

|            |              |             |              |          |          |             |
|------------|--------------|-------------|--------------|----------|----------|-------------|
| ARHGAP27   | 0.936267148  | 5.095147166 | 7.193704057  | 4.56E-11 | 5.02E-09 | 14.84842183 |
| LSP1       | 1.859955414  | 5.8697923   | 7.182035805  | 4.85E-11 | 5.30E-09 | 14.78937715 |
| GPSM3      | 0.775630567  | 7.358656276 | 7.178291199  | 4.95E-11 | 5.35E-09 | 14.77043684 |
| SULF2      | 1.906897511  | 3.940552996 | 7.178127245  | 4.95E-11 | 5.35E-09 | 14.76960765 |
| SIGLEC1    | 2.088345287  | 1.859803923 | 7.177007275  | 4.98E-11 | 5.35E-09 | 14.76394367 |
| FCGR2B     | 1.252963019  | 1.712670385 | 7.164242591  | 5.32E-11 | 5.69E-09 | 14.6994154  |
| ITGB2      | 1.655489708  | 7.508271431 | 7.160681301  | 5.42E-11 | 5.77E-09 | 14.68142088 |
| KCNQ1      | 1.657251304  | 3.175357884 | 7.155906873  | 5.56E-11 | 5.88E-09 | 14.65730249 |
| UBXN11     | 1.218851325  | 5.094976191 | 7.150886562  | 5.71E-11 | 6.00E-09 | 14.63194929 |
| NPC2       | 0.847005594  | 6.122565241 | 7.145387499  | 5.87E-11 | 6.14E-09 | 14.60418691 |
| HCK        | 1.805378808  | 6.00499591  | 7.14238879   | 5.97E-11 | 6.21E-09 | 14.58905152 |
| HELZ2      | 1.283957447  | 3.37990549  | 7.128295718  | 6.42E-11 | 6.65E-09 | 14.51795544 |
| FCGR1B     | 1.221519293  | 1.772438313 | 7.125848966  | 6.50E-11 | 6.66E-09 | 14.50561823 |
| NAGK       | 0.766246718  | 5.247299873 | 7.12576598   | 6.51E-11 | 6.66E-09 | 14.50519982 |
| PHOSPHO1   | 1.539246383  | 2.673896969 | 7.113923637  | 6.92E-11 | 7.03E-09 | 14.44551303 |
| PIK3R5     | 1.069174517  | 4.979591384 | 7.11356854   | 6.93E-11 | 7.03E-09 | 14.44372396 |
| AL049634.2 | 0.822321117  | 0.759371869 | 7.108077081  | 7.13E-11 | 7.19E-09 | 14.41606126 |
| SLC37A2    | 1.647172718  | 2.676983118 | 7.093618519  | 7.69E-11 | 7.71E-09 | 14.34327115 |
| SAT1       | 1.400211858  | 7.790548298 | 7.092478165  | 7.74E-11 | 7.72E-09 | 14.33753285 |
| RAB24      | 0.965399105  | 4.156407807 | 7.089534341  | 7.86E-11 | 7.80E-09 | 14.32272124 |
| METRNL     | 1.438578253  | 3.931491566 | 7.087386788  | 7.94E-11 | 7.85E-09 | 14.31191767 |
| NCF2       | 2.033122656  | 6.16819615  | 7.086295534  | 7.99E-11 | 7.85E-09 | 14.30642849 |
| CDH23      | 1.063027189  | 1.753270731 | 7.078311392  | 8.33E-11 | 8.14E-09 | 14.26627805 |
| VSIR       | 1.604920855  | 7.03775136  | 7.072798046  | 8.57E-11 | 8.34E-09 | 14.23856401 |
| KLF4       | 2.287813692  | 4.945466196 | 7.066906964  | 8.84E-11 | 8.55E-09 | 14.20896146 |
| ITGAX      | 1.867448079  | 5.574569174 | 7.055371863  | 9.38E-11 | 9.04E-09 | 14.15102858 |
| VIPR1      | 1.253741526  | 2.077591009 | 7.052049442  | 9.54E-11 | 9.15E-09 | 14.13434992 |
| RARA       | 0.992524744  | 5.016438459 | 7.050013059  | 9.65E-11 | 9.20E-09 | 14.12412889 |
| HLA-F      | 1.292178125  | 4.464092342 | 7.049046905  | 9.69E-11 | 9.20E-09 | 14.11928001 |
| CASP1      | 1.301787775  | 5.3299624   | 7.043760757  | 9.96E-11 | 9.41E-09 | 14.09275525 |
| SGTB       | 0.834983445  | 3.181079758 | 7.025458152  | 1.10E-10 | 1.03E-08 | 14.00098338 |
| MPEG1      | 3.112403257  | 6.077885154 | 7.024547061  | 1.10E-10 | 1.03E-08 | 13.99641775 |
| S100A9     | 3.474694208  | 9.319288163 | 7.020718269  | 1.12E-10 | 1.04E-08 | 13.97723385 |
| HLA-E      | 0.874447677  | 9.104817459 | 7.019476455  | 1.13E-10 | 1.04E-08 | 13.9710128  |
| ARRB2      | 1.023788536  | 6.792434636 | 7.019020149  | 1.13E-10 | 1.04E-08 | 13.96872699 |
| MS4A4A     | 2.183098132  | 3.116552624 | 7.001584541  | 1.24E-10 | 1.14E-08 | 13.88143401 |
| PELI1      | 1.389626679  | 4.575684199 | 6.999434286  | 1.25E-10 | 1.15E-08 | 13.87067514 |
| NUCB2      | -1.014509054 | 6.633682321 | -6.997461459 | 1.27E-10 | 1.15E-08 | 13.86080531 |
| ZNF385A    | 1.437762613  | 5.513079175 | 6.992449035  | 1.30E-10 | 1.18E-08 | 13.83573421 |
| MBD2       | 0.604644955  | 5.096147659 | 6.991703496  | 1.30E-10 | 1.18E-08 | 13.83200585 |
| ASGR1      | 0.81952304   | 1.500019672 | 6.986359355  | 1.34E-10 | 1.20E-08 | 13.8052855  |
| S100A8     | 3.384437152  | 7.835949218 | 6.981674364  | 1.37E-10 | 1.23E-08 | 13.78186825 |
| KCTD12     | 2.502112184  | 4.685683084 | 6.976480013  | 1.41E-10 | 1.25E-08 | 13.75591312 |
| CTLA4      | 0.972015934  | 1.387833039 | 6.975098709  | 1.42E-10 | 1.26E-08 | 13.74901245 |
| S100A6     | 1.586884697  | 7.328031731 | 6.968597394  | 1.47E-10 | 1.29E-08 | 13.71654153 |
| GIMAP5     | 0.972171573  | 1.573096694 | 6.955456088  | 1.57E-10 | 1.38E-08 | 13.65094794 |
| S100A12    | 3.344051651  | 5.358097062 | 6.945110577  | 1.66E-10 | 1.44E-08 | 13.59934791 |

|          |              |             |              |          |          |             |
|----------|--------------|-------------|--------------|----------|----------|-------------|
| TTC26    | -0.661961194 | 2.20658842  | -6.944903933 | 1.66E-10 | 1.44E-08 | 13.59831759 |
| FCER1G   | 1.97445603   | 7.540687066 | 6.934247798  | 1.76E-10 | 1.52E-08 | 13.54520468 |
| CD86     | 2.120068394  | 3.890872624 | 6.925624507  | 1.83E-10 | 1.57E-08 | 13.50225061 |
| F5       | 1.608154144  | 2.113048935 | 6.925350377  | 1.84E-10 | 1.57E-08 | 13.50088552 |
| IL1RN    | 1.97591815   | 3.106985169 | 6.924707462  | 1.84E-10 | 1.57E-08 | 13.49768406 |
| IL15     | 1.230635181  | 1.293970894 | 6.919144542  | 1.90E-10 | 1.61E-08 | 13.46998852 |
| ODF3B    | 1.544304664  | 4.003443613 | 6.918953499  | 1.90E-10 | 1.61E-08 | 13.46903757 |
| SIRPB1   | 2.192499305  | 3.958171753 | 6.911742224  | 1.97E-10 | 1.66E-08 | 13.43315082 |
| SIGLEC10 | 1.348117358  | 4.240194862 | 6.910590276  | 1.98E-10 | 1.66E-08 | 13.42741973 |
| IFIT2    | 1.244847576  | 2.80014252  | 6.906599996  | 2.02E-10 | 1.69E-08 | 13.40757088 |
| NAMPT    | 1.529501876  | 4.648581306 | 6.886543569  | 2.24E-10 | 1.87E-08 | 13.30788232 |
| PDK4     | 1.909754401  | 2.195121961 | 6.883866649  | 2.27E-10 | 1.88E-08 | 13.29458683 |
| SH3BP5   | 1.211130716  | 2.022147657 | 6.876907429  | 2.36E-10 | 1.94E-08 | 13.26003332 |
| FCGR2A   | 1.780565767  | 4.491287686 | 6.874946689  | 2.38E-10 | 1.96E-08 | 13.25030082 |
| LILRB4   | 2.395877638  | 2.799017395 | 6.867290035  | 2.48E-10 | 2.02E-08 | 13.21230765 |
| CD4      | 1.696072617  | 5.787242216 | 6.859396281  | 2.58E-10 | 2.10E-08 | 13.17315806 |
| CUEDC1   | 1.262998419  | 2.087713464 | 6.85829716   | 2.59E-10 | 2.10E-08 | 13.16770852 |
| RAB39A   | 1.209715355  | 1.329752205 | 6.856415646  | 2.62E-10 | 2.11E-08 | 13.15838073 |
| GLIPR2   | 1.301950499  | 5.75363068  | 6.856389889  | 2.62E-10 | 2.11E-08 | 13.15825305 |
| PPM1M    | 1.042964938  | 4.674538714 | 6.852253429  | 2.68E-10 | 2.14E-08 | 13.13775027 |
| ATP6VOD1 | 0.828753872  | 4.981982177 | 6.848308024  | 2.73E-10 | 2.18E-08 | 13.11819972 |
| FGL2     | 2.313108936  | 5.399648057 | 6.845953253  | 2.76E-10 | 2.19E-08 | 13.10653364 |
| EXTL2    | -0.782923868 | 3.824774173 | -6.826329882 | 3.06E-10 | 2.42E-08 | 13.00938624 |
| TLR1     | 1.261448299  | 4.200024446 | 6.825358633  | 3.07E-10 | 2.42E-08 | 13.0045813  |
| ADAP1    | 1.148081823  | 3.353238454 | 6.822429719  | 3.12E-10 | 2.45E-08 | 12.99009332 |
| STMN1    | -0.892723287 | 6.836649088 | -6.82130577  | 3.13E-10 | 2.45E-08 | 12.98453442 |
| VCAN     | 3.20386564   | 5.315015266 | 6.818070968  | 3.19E-10 | 2.48E-08 | 12.96853789 |
| CYTH4    | 1.558185491  | 5.469444478 | 6.817065485  | 3.20E-10 | 2.48E-08 | 12.96356635 |
| HFE      | 0.826898619  | 0.972314187 | 6.81430249   | 3.25E-10 | 2.51E-08 | 12.94990665 |
| SERPINA1 | 2.582003849  | 5.451767005 | 6.810362636  | 3.32E-10 | 2.55E-08 | 12.9304332  |
| ABCC3    | 1.236932368  | 1.29277221  | 6.800924216  | 3.48E-10 | 2.67E-08 | 12.88380318 |
| NPL      | 1.574172245  | 3.043714223 | 6.796782294  | 3.55E-10 | 2.71E-08 | 12.86334965 |
| CD300A   | 1.448331316  | 5.193974522 | 6.791164486  | 3.66E-10 | 2.77E-08 | 12.83561714 |
| MYCL     | 1.496768006  | 1.484927119 | 6.791002455  | 3.66E-10 | 2.77E-08 | 12.83481742 |
| SAMD4A   | 0.836729666  | 0.79867859  | 6.789420482  | 3.69E-10 | 2.78E-08 | 12.82700996 |
| RHBDF2   | 1.166885496  | 4.767639266 | 6.787345818  | 3.73E-10 | 2.80E-08 | 12.8167722  |
| ZNF467   | 1.450989849  | 4.617135123 | 6.780901495  | 3.85E-10 | 2.88E-08 | 12.78498092 |
| CXCL10   | 1.325744802  | 1.240527128 | 6.779352238  | 3.88E-10 | 2.90E-08 | 12.77734018 |
| LGALS2   | 2.641642822  | 3.003776548 | 6.767838033  | 4.12E-10 | 3.06E-08 | 12.72057897 |
| HCLS1    | 0.692931567  | 7.022324465 | 6.757874914  | 4.33E-10 | 3.21E-08 | 12.67150033 |
| RBM47    | 2.120473342  | 3.442842442 | 6.755747826  | 4.38E-10 | 3.23E-08 | 12.6610266  |
| GCSH     | -0.601458359 | 2.239177312 | -6.750273131 | 4.50E-10 | 3.31E-08 | 12.6340764  |
| EPSTI1   | 1.556470705  | 2.661008052 | 6.734484818  | 4.88E-10 | 3.57E-08 | 12.55641277 |
| ITGAL    | 1.336467754  | 6.810286802 | 6.72916104   | 5.02E-10 | 3.66E-08 | 12.53024402 |
| PLBD1    | 2.696656109  | 3.923940727 | 6.721436205  | 5.22E-10 | 3.79E-08 | 12.49229031 |
| IRF9     | 0.7959584    | 4.424338944 | 6.718957283  | 5.28E-10 | 3.82E-08 | 12.4801152  |
| TMEM127  | 0.587363513  | 5.737906135 | 6.717955937  | 5.31E-10 | 3.83E-08 | 12.47519773 |

|          |              |             |              |          |          |             |
|----------|--------------|-------------|--------------|----------|----------|-------------|
| RTN1     | 1.149579858  | 0.898680262 | 6.711689079  | 5.48E-10 | 3.94E-08 | 12.44442996 |
| CDC42EP2 | 0.908491412  | 2.778643968 | 6.700465301  | 5.80E-10 | 4.15E-08 | 12.38935957 |
| VASP     | 0.766150847  | 6.474371156 | 6.691353082  | 6.08E-10 | 4.33E-08 | 12.3446818  |
| MX1      | 1.661063456  | 3.124276432 | 6.687267564  | 6.21E-10 | 4.39E-08 | 12.32465961 |
| CCDC69   | 0.854831407  | 5.761811834 | 6.682727648  | 6.35E-10 | 4.48E-08 | 12.30241734 |
| 1-Mar    | 1.298988175  | 3.907991349 | 6.68036963   | 6.43E-10 | 4.51E-08 | 12.29086761 |
| MCOLN1   | 0.841642328  | 4.216811789 | 6.668695093  | 6.82E-10 | 4.76E-08 | 12.23371352 |
| CRISPLD2 | 1.626098203  | 2.270341399 | 6.664853639  | 6.95E-10 | 4.81E-08 | 12.21491764 |
| MY01F    | 1.004132808  | 6.912238258 | 6.663124663  | 7.01E-10 | 4.84E-08 | 12.20645961 |
| TM7SF3   | -0.970342375 | 7.259520097 | -6.653870659 | 7.35E-10 | 5.05E-08 | 12.16120749 |
| RXRA     | 1.327613651  | 4.117097117 | 6.64765084   | 7.58E-10 | 5.18E-08 | 12.13080947 |
| WARS     | 0.969441518  | 5.771233178 | 6.647606958  | 7.59E-10 | 5.18E-08 | 12.13059505 |
| FAM214B  | 0.754524464  | 4.26618798  | 6.641775987  | 7.81E-10 | 5.32E-08 | 12.10210991 |
| ZBTB7B   | 1.198335369  | 5.450325155 | 6.640252621  | 7.87E-10 | 5.34E-08 | 12.09467002 |
| FCGRT    | 1.550686159  | 5.530985589 | 6.632438873  | 8.19E-10 | 5.53E-08 | 12.05652176 |
| BTG2     | 1.094442069  | 6.686992103 | 6.63044304   | 8.27E-10 | 5.57E-08 | 12.04678117 |
| WAS      | 0.756188625  | 7.211238062 | 6.625294397  | 8.49E-10 | 5.70E-08 | 12.02165993 |
| CD48     | 1.519319444  | 5.177797106 | 6.623111822  | 8.59E-10 | 5.72E-08 | 12.01101356 |
| TBC1D2   | 1.03400348   | 4.769329342 | 6.612065249  | 9.08E-10 | 6.01E-08 | 11.95715551 |
| UNC5A    | 1.376872188  | 1.401855363 | 6.597656769  | 9.76E-10 | 6.44E-08 | 11.88697172 |
| MS4A6A   | 2.547294846  | 4.821041588 | 6.594078259  | 9.94E-10 | 6.54E-08 | 11.86955229 |
| P2RY13   | 1.933140612  | 4.020890502 | 6.589627928  | 1.02E-09 | 6.66E-08 | 11.84789542 |
| RPGRIP1L | -0.587518705 | 1.628124875 | -6.588721463 | 1.02E-09 | 6.67E-08 | 11.84348512 |
| SRC      | 1.403048677  | 3.125824526 | 6.582889557  | 1.05E-09 | 6.84E-08 | 11.81511769 |
| UPP1     | 1.486284578  | 3.457215536 | 6.576432026  | 1.09E-09 | 7.05E-08 | 11.78372139 |
| ZDHHC7   | 0.686397971  | 5.775033454 | 6.553356179  | 1.22E-09 | 7.88E-08 | 11.67165045 |
| MS4A7    | 1.783310999  | 4.713307771 | 6.552893276  | 1.22E-09 | 7.88E-08 | 11.66940427 |
| MSH5     | -0.622408329 | 4.279340664 | -6.545241064 | 1.27E-09 | 8.16E-08 | 11.6322842  |
| RNF166   | 0.82883107   | 5.704947975 | 6.54458299   | 1.28E-09 | 8.16E-08 | 11.62909295 |
| COR07    | 0.607106673  | 3.677876191 | 6.541650713  | 1.29E-09 | 8.26E-08 | 11.61487513 |
| DSCC1    | -0.885973182 | 3.874759759 | -6.538851303 | 1.31E-09 | 8.34E-08 | 11.60130448 |
| CD300LB  | 2.016244355  | 3.30360258  | 6.538412075  | 1.32E-09 | 8.34E-08 | 11.5991755  |
| IER5     | 0.746954093  | 4.234253417 | 6.530446093  | 1.37E-09 | 8.65E-08 | 11.56057586 |
| CMKLR1   | 1.340429956  | 1.841052602 | 6.527643862  | 1.39E-09 | 8.74E-08 | 11.547003   |
| KCNJ2    | 0.911072287  | 0.694091132 | 6.523865639  | 1.41E-09 | 8.88E-08 | 11.52870739 |
| S100A4   | 1.318246823  | 8.209092696 | 6.515404573  | 1.48E-09 | 9.24E-08 | 11.48775464 |
| C5AR2    | 1.168632943  | 1.765420941 | 6.499536127  | 1.60E-09 | 9.94E-08 | 11.41102013 |
| JUNB     | 1.202706931  | 8.415425677 | 6.484707405  | 1.72E-09 | 1.06E-07 | 11.33939744 |
| CYP27A1  | 1.873712956  | 1.991508029 | 6.482496982  | 1.74E-09 | 1.07E-07 | 11.32872809 |
| VMP1     | 0.80083544   | 6.108875047 | 6.479652165  | 1.77E-09 | 1.08E-07 | 11.31499928 |
| OGFR     | 0.702821838  | 5.214758512 | 6.47706464   | 1.79E-09 | 1.09E-07 | 11.30251476 |
| TLDC2    | 1.537093289  | 3.688747872 | 6.474479113  | 1.81E-09 | 1.11E-07 | 11.29004236 |
| FCN2     | 0.634924967  | 0.575716081 | 6.471717067  | 1.84E-09 | 1.12E-07 | 11.2767212  |
| IFI35    | 0.672421441  | 4.896921101 | 6.46807418   | 1.87E-09 | 1.13E-07 | 11.25915614 |
| CTSZ     | 1.131722877  | 7.337766283 | 6.460409833  | 1.94E-09 | 1.17E-07 | 11.22221682 |
| FYN      | 1.041457736  | 4.568401008 | 6.45997167   | 1.95E-09 | 1.17E-07 | 11.2201057  |
| LST1     | 1.576098861  | 5.94027799  | 6.457306105  | 1.97E-09 | 1.19E-07 | 11.20726425 |

|          |               |              |               |           |           |              |
|----------|---------------|--------------|---------------|-----------|-----------|--------------|
| MYOF     | 1. 964456702  | 2. 827258831 | 6. 42977704   | 2. 26E-09 | 1. 34E-07 | 11. 07479796 |
| CDKN2D   | 1. 012550157  | 4. 977938426 | 6. 429268295  | 2. 27E-09 | 1. 34E-07 | 11. 07235263 |
| CTSL     | 1. 71475953   | 3. 106139485 | 6. 414964409  | 2. 44E-09 | 1. 44E-07 | 11. 00363974 |
| ZC3HAV1L | -0. 955339779 | 4. 575340843 | -6. 414560497 | 2. 44E-09 | 1. 44E-07 | 11. 00170055 |
| LTB      | 1. 28942547   | 4. 264333184 | 6. 407498961  | 2. 53E-09 | 1. 48E-07 | 10. 96780807 |
| FLOT1    | 1. 099397807  | 5. 537973537 | 6. 398471277  | 2. 65E-09 | 1. 55E-07 | 10. 9245065  |
| MX2      | 1. 132386513  | 3. 61685978  | 6. 378623152  | 2. 92E-09 | 1. 68E-07 | 10. 82941369 |
| MS4A14   | 1. 77462747   | 3. 232899066 | 6. 37799644   | 2. 93E-09 | 1. 68E-07 | 10. 82641356 |
| ITGB7    | 1. 323538637  | 4. 276810181 | 6. 374213971  | 2. 99E-09 | 1. 71E-07 | 10. 80830969 |
| NR4A1    | 1. 673280695  | 3. 42797839  | 6. 36871488   | 3. 07E-09 | 1. 75E-07 | 10. 78199942 |
| ITPKA    | -1. 156978922 | 1. 855193202 | -6. 361118684 | 3. 19E-09 | 1. 81E-07 | 10. 74567474 |
| IL32     | 1. 105591662  | 2. 878735507 | 6. 360526299  | 3. 19E-09 | 1. 81E-07 | 10. 74284292 |
| OAS2     | 1. 454336314  | 4. 696756134 | 6. 350242518  | 3. 36E-09 | 1. 90E-07 | 10. 69370414 |
| SLC12A9  | 0. 976767491  | 4. 336475342 | 6. 348098071  | 3. 40E-09 | 1. 92E-07 | 10. 68346252 |
| GZMB     | 1. 486488547  | 2. 868471129 | 6. 34690155   | 3. 42E-09 | 1. 92E-07 | 10. 67774886 |
| CD163    | 2. 628171268  | 3. 301821017 | 6. 345887495  | 3. 44E-09 | 1. 93E-07 | 10. 67290695 |
| DTX4     | 1. 397827723  | 2. 660175077 | 6. 34306953   | 3. 48E-09 | 1. 95E-07 | 10. 65945381 |
| SPI1     | 0. 888402448  | 7. 805695382 | 6. 342528574  | 3. 49E-09 | 1. 95E-07 | 10. 65687161 |
| TCIRG1   | 1. 217853245  | 6. 746062304 | 6. 338891917  | 3. 56E-09 | 1. 97E-07 | 10. 6395153  |
| NLR4     | 1. 447593296  | 3. 335477271 | 6. 338829939  | 3. 56E-09 | 1. 97E-07 | 10. 63921955 |
| GASK1B   | 1. 938242816  | 3. 242688766 | 6. 337540608  | 3. 58E-09 | 1. 97E-07 | 10. 63306735 |
| LTA      | 0. 725906754  | 1. 141035509 | 6. 334621098  | 3. 63E-09 | 2. 00E-07 | 10. 61913894 |
| ANXA5    | 1. 996341082  | 5. 291382602 | 6. 327404066  | 3. 76E-09 | 2. 06E-07 | 10. 58472214 |
| IL27     | 0. 693863866  | 1. 139291197 | 6. 323598201  | 3. 84E-09 | 2. 09E-07 | 10. 56658078 |
| Clorf162 | 1. 332140165  | 5. 92191534  | 6. 320205448  | 3. 90E-09 | 2. 12E-07 | 10. 55041335 |
| SH3BGR13 | 0. 940736667  | 8. 963439244 | 6. 297515311  | 4. 36E-09 | 2. 36E-07 | 10. 44240421 |
| NIBAN2   | 1. 641865169  | 3. 846634564 | 6. 288635563  | 4. 56E-09 | 2. 46E-07 | 10. 40019003 |
| SCCPDH   | -0. 702025035 | 6. 417102158 | -6. 288227725 | 4. 57E-09 | 2. 46E-07 | 10. 39825192 |
| RGL1     | 1. 014140051  | 1. 362122904 | 6. 284495512  | 4. 65E-09 | 2. 49E-07 | 10. 3805189  |
| CDK6     | -1. 039815334 | 7. 442171529 | -6. 28442819  | 4. 65E-09 | 2. 49E-07 | 10. 38019908 |
| ADAM19   | 1. 172253605  | 2. 795049451 | 6. 27769822   | 4. 81E-09 | 2. 57E-07 | 10. 34823679 |
| FGD3     | 0. 69916372   | 5. 893441489 | 6. 276135327  | 4. 85E-09 | 2. 58E-07 | 10. 34081679 |
| RASSF3   | 0. 748233488  | 5. 580033678 | 6. 265390898  | 5. 11E-09 | 2. 72E-07 | 10. 28983262 |
| CYBB     | 2. 320496345  | 6. 754759134 | 6. 258714245  | 5. 28E-09 | 2. 80E-07 | 10. 25817382 |
| 2-Mar    | 0. 755022774  | 4. 658895998 | 6. 248291414  | 5. 56E-09 | 2. 94E-07 | 10. 20878716 |
| SH2B3    | 0. 732427132  | 6. 301788747 | 6. 245706444  | 5. 63E-09 | 2. 97E-07 | 10. 19654546 |
| HPSE     | 1. 425111055  | 2. 930659831 | 6. 240910489  | 5. 76E-09 | 3. 03E-07 | 10. 17384021 |
| NACC2    | 1. 349765496  | 3. 554447265 | 6. 217674493  | 6. 46E-09 | 3. 37E-07 | 10. 06396566 |
| REM2     | 0. 604701132  | 1. 368418908 | 6. 209684471  | 6. 72E-09 | 3. 49E-07 | 10. 0262339  |
| OTUD1    | 0. 976235392  | 4. 231977993 | 6. 197012222  | 7. 15E-09 | 3. 70E-07 | 9. 966443838 |
| SMPDL3A  | 1. 481596719  | 1. 446687814 | 6. 181775462  | 7. 70E-09 | 3. 96E-07 | 9. 894640067 |
| MAPK7    | 0. 897840048  | 3. 361176524 | 6. 18130275   | 7. 72E-09 | 3. 96E-07 | 9. 892413903 |
| UCP2     | 0. 811631232  | 7. 66296931  | 6. 172568757  | 8. 06E-09 | 4. 13E-07 | 9. 851298898 |
| IFNGR2   | 0. 835935303  | 5. 898829393 | 6. 171925672  | 8. 08E-09 | 4. 13E-07 | 9. 848272829 |
| ARHGAP45 | 0. 913385815  | 6. 827619553 | 6. 171321047  | 8. 10E-09 | 4. 13E-07 | 9. 845427881 |
| TFE3     | 0. 669589071  | 5. 477672223 | 6. 168679398  | 8. 21E-09 | 4. 15E-07 | 9. 832999874 |
| VPS37C   | 0. 659502269  | 3. 836060615 | 6. 168378943  | 8. 22E-09 | 4. 15E-07 | 9. 831586519 |



|          |              |             |              |          |          |             |
|----------|--------------|-------------|--------------|----------|----------|-------------|
| HVCN1    | 1.126118644  | 4.424530386 | 6.168052581  | 8.24E-09 | 4.15E-07 | 9.830051343 |
| BCKDHB   | -0.585449996 | 4.00574761  | -6.166768996 | 8.29E-09 | 4.17E-07 | 9.824013893 |
| IFNGR1   | 0.962548599  | 6.613125242 | 6.165844935  | 8.32E-09 | 4.18E-07 | 9.819667914 |
| UNC93B1  | 1.079605412  | 5.499997075 | 6.163591287  | 8.42E-09 | 4.21E-07 | 9.80907017  |
| DNASE1L1 | 0.665281151  | 4.082185815 | 6.160221137  | 8.56E-09 | 4.27E-07 | 9.793225977 |
| CD1A     | 0.732712233  | 0.643199317 | 6.15805671   | 8.65E-09 | 4.30E-07 | 9.783052736 |
| TNFSF8   | 1.246456671  | 3.753683616 | 6.157330175  | 8.68E-09 | 4.31E-07 | 9.779638306 |
| IGF2R    | 1.535002825  | 3.903582084 | 6.153776851  | 8.83E-09 | 4.37E-07 | 9.762942195 |
| HLX      | 1.139724739  | 3.726118575 | 6.152385336  | 8.89E-09 | 4.39E-07 | 9.756405254 |
| RGS19    | 0.797069509  | 6.585377363 | 6.150853451  | 8.96E-09 | 4.41E-07 | 9.749209812 |
| LTA4H    | 0.887635075  | 6.13045807  | 6.149812699  | 9.00E-09 | 4.42E-07 | 9.744321827 |
| SMAP2    | 0.847975136  | 7.363702843 | 6.1484414    | 9.06E-09 | 4.44E-07 | 9.737882079 |
| ARSG     | 0.771732391  | 1.722179836 | 6.140413357  | 9.42E-09 | 4.61E-07 | 9.700197157 |
| FAM89B   | 0.68536625   | 4.662041496 | 6.13637271   | 9.61E-09 | 4.68E-07 | 9.681239749 |
| TECPR1   | 0.628906361  | 3.668228676 | 6.127101616  | 1.01E-08 | 4.88E-07 | 9.637768226 |
| SNX21    | 0.601370369  | 2.486741328 | 6.126447091  | 1.01E-08 | 4.88E-07 | 9.634700547 |
| KCNE1    | 1.34916249   | 1.811483873 | 6.124475554  | 1.02E-08 | 4.92E-07 | 9.625461259 |
| ANKRD34B | 0.643948111  | 0.409009177 | 6.115267623  | 1.07E-08 | 5.13E-07 | 9.582331095 |
| PEA15    | 0.736410003  | 5.611009231 | 6.108501969  | 1.10E-08 | 5.28E-07 | 9.550663024 |
| RHOC     | 1.081418466  | 3.530700423 | 6.106127565  | 1.11E-08 | 5.32E-07 | 9.539553635 |
| LAPTM5   | 0.869331273  | 9.662457066 | 6.105538153  | 1.12E-08 | 5.33E-07 | 9.53679625  |
| PPP1R9B  | 0.616154281  | 6.907087375 | 6.104526042  | 1.12E-08 | 5.34E-07 | 9.532061734 |
| ARRDC2   | 0.714094174  | 5.254869812 | 6.090973879  | 1.20E-08 | 5.67E-07 | 9.468707697 |
| ARHGAP24 | 1.014631904  | 1.541763167 | 6.084765301  | 1.24E-08 | 5.83E-07 | 9.439709268 |
| PTPRO    | 1.217297646  | 1.852962199 | 6.083425088  | 1.24E-08 | 5.85E-07 | 9.433451646 |
| PTPRE    | 0.961567196  | 5.477677298 | 6.083122371  | 1.24E-08 | 5.85E-07 | 9.432038327 |
| MAST3    | 0.807658376  | 4.944478148 | 6.082687147  | 1.25E-08 | 5.85E-07 | 9.430006431 |
| FAM49A   | 1.302012219  | 4.219680262 | 6.078956158  | 1.27E-08 | 5.94E-07 | 9.412591093 |
| MTSS1    | 1.426065264  | 4.09110557  | 6.078069096  | 1.28E-08 | 5.95E-07 | 9.408451365 |
| RIPOR2   | 1.028616993  | 6.114790125 | 6.0747067    | 1.30E-08 | 6.04E-07 | 9.392762782 |
| FXYP6    | 1.405687643  | 1.768818323 | 6.07308648   | 1.31E-08 | 6.07E-07 | 9.385204699 |
| MYB      | -0.747495103 | 7.576041513 | -6.065754076 | 1.35E-08 | 6.26E-07 | 9.351013933 |
| MICAL2   | 1.17656966   | 3.008725041 | 6.06520347   | 1.36E-08 | 6.26E-07 | 9.348447389 |
| IGSF6    | 1.364872978  | 4.615148262 | 6.062284311  | 1.38E-08 | 6.32E-07 | 9.334842413 |
| APOL3    | 1.165023131  | 3.656558675 | 6.061715876  | 1.38E-08 | 6.32E-07 | 9.332193596 |
| FKBP15   | 0.76062447   | 4.845502874 | 6.04067963   | 1.53E-08 | 6.97E-07 | 9.234263865 |
| FTL      | 0.816034514  | 11.45654338 | 6.03394817   | 1.58E-08 | 7.18E-07 | 9.202966559 |
| RENBP    | 0.962905872  | 4.268942176 | 6.033340433  | 1.58E-08 | 7.18E-07 | 9.200141889 |
| FMNL1    | 0.745750595  | 6.899504621 | 6.03270633   | 1.59E-08 | 7.19E-07 | 9.197194841 |
| FAM161A  | -0.644775816 | 2.236113972 | -6.029818046 | 1.61E-08 | 7.26E-07 | 9.183773453 |
| S100A11  | 1.445957652  | 8.116365333 | 6.027610692  | 1.63E-08 | 7.31E-07 | 9.173518624 |
| SASH3    | 0.802167378  | 7.225464281 | 6.027411685  | 1.63E-08 | 7.31E-07 | 9.172594187 |
| USP3     | 0.654429148  | 5.167163092 | 6.024887872  | 1.65E-08 | 7.38E-07 | 9.160871923 |
| BEST1    | 0.859569398  | 2.276921244 | 6.023430813  | 1.66E-08 | 7.41E-07 | 9.154105611 |
| NCR3     | 0.74371314   | 2.198024648 | 6.023129577  | 1.66E-08 | 7.41E-07 | 9.15270684  |
| TSPAN14  | 0.871238378  | 4.480868472 | 6.021530765  | 1.68E-08 | 7.45E-07 | 9.145283493 |
| MGAT1    | 0.597867823  | 6.207336938 | 6.016097022  | 1.72E-08 | 7.61E-07 | 9.120062566 |

|          |              |             |              |          |          |             |
|----------|--------------|-------------|--------------|----------|----------|-------------|
| KCTD17   | 0.967056098  | 2.526598002 | 6.012704453  | 1.75E-08 | 7.72E-07 | 9.104322216 |
| BDH1     | -0.803150317 | 3.636756221 | -6.007147224 | 1.80E-08 | 7.91E-07 | 9.078549223 |
| LCK      | 1.203102926  | 3.49076574  | 5.991221499  | 1.94E-08 | 8.52E-07 | 9.00476309  |
| CTSD     | 1.201170439  | 8.014973105 | 5.979911981  | 2.05E-08 | 8.94E-07 | 8.952430678 |
| GLT1D1   | 1.508804778  | 1.684444456 | 5.978998166  | 2.06E-08 | 8.95E-07 | 8.948204597 |
| FAM110A  | 0.82542184   | 3.992871358 | 5.978793366  | 2.06E-08 | 8.95E-07 | 8.947257515 |
| BIRC3    | 0.856192836  | 3.638037633 | 5.964870478  | 2.20E-08 | 9.52E-07 | 8.882914785 |
| OSBPL11  | 0.852918745  | 4.487273237 | 5.959770945  | 2.26E-08 | 9.74E-07 | 8.85936898  |
| PPFIBP2  | 0.949885894  | 1.726621015 | 5.95818794   | 2.27E-08 | 9.77E-07 | 8.852062143 |
| SLC16A3  | 1.0451445    | 4.271781795 | 5.958120277  | 2.27E-08 | 9.77E-07 | 8.851749853 |
| RASGEF1B | 1.147977816  | 2.921523395 | 5.956207901  | 2.30E-08 | 9.84E-07 | 8.842924214 |
| PTPN6    | 0.817774985  | 7.234023399 | 5.954991054  | 2.31E-08 | 9.88E-07 | 8.837309276 |
| CTSH     | 1.187799196  | 4.45395517  | 5.953635528  | 2.32E-08 | 9.92E-07 | 8.831055187 |
| CD3E     | 1.212410805  | 4.440541852 | 5.94416366   | 2.43E-08 | 1.03E-06 | 8.787376431 |
| C1QA     | 2.25153718   | 3.16539599  | 5.941097193  | 2.47E-08 | 1.05E-06 | 8.773244037 |
| SIGLEC11 | 0.987386138  | 0.919149087 | 5.940574246  | 2.47E-08 | 1.05E-06 | 8.770834343 |
| AP1S2    | 1.176070165  | 5.05034129  | 5.937317401  | 2.51E-08 | 1.06E-06 | 8.755829786 |
| CCL3     | 1.182469539  | 2.613314957 | 5.936008991  | 2.53E-08 | 1.07E-06 | 8.749803137 |
| TREM1    | 1.698056571  | 4.039106566 | 5.930852454  | 2.59E-08 | 1.09E-06 | 8.726058959 |
| EMP3     | 0.986533156  | 7.359197373 | 5.930646322  | 2.59E-08 | 1.09E-06 | 8.725110031 |
| CD1C     | 1.879383399  | 2.358355123 | 5.923150016  | 2.69E-08 | 1.13E-06 | 8.690613394 |
| PCED1B   | 1.007313968  | 2.975299748 | 5.921492069  | 2.71E-08 | 1.13E-06 | 8.682987146 |
| NFKBIZ   | 1.002305311  | 6.31298943  | 5.916758988  | 2.77E-08 | 1.15E-06 | 8.661222489 |
| LRP10    | 0.838845327  | 5.321186168 | 5.913775154  | 2.81E-08 | 1.17E-06 | 8.647506642 |
| ITK      | 1.063906404  | 2.556901192 | 5.911836714  | 2.84E-08 | 1.18E-06 | 8.638598278 |
| CDA      | 2.160558257  | 4.441763504 | 5.910710879  | 2.85E-08 | 1.18E-06 | 8.633425105 |
| MYO7A    | 1.240549534  | 1.324821171 | 5.907065589  | 2.90E-08 | 1.20E-06 | 8.616678952 |
| PUS7     | -0.711850663 | 3.886679934 | -5.893173497 | 3.10E-08 | 1.27E-06 | 8.552913545 |
| MEI1     | 0.591990728  | 2.534094588 | 5.89182899   | 3.12E-08 | 1.28E-06 | 8.546746709 |
| HLA-DOB  | 0.905619104  | 3.044809889 | 5.88529955   | 3.22E-08 | 1.31E-06 | 8.516809569 |
| PRELID1  | 0.649822323  | 5.133000233 | 5.884278963  | 3.24E-08 | 1.32E-06 | 8.512131936 |
| IFIT1    | 1.145794514  | 1.941527175 | 5.874861921  | 3.39E-08 | 1.37E-06 | 8.468992823 |
| NOD2     | 1.563281253  | 3.361229903 | 5.870516982  | 3.46E-08 | 1.40E-06 | 8.449102089 |
| NAGA     | 1.05029401   | 5.860961359 | 5.867738316  | 3.50E-08 | 1.41E-06 | 8.436386012 |
| STAT6    | 0.596042258  | 7.244053141 | 5.856630609  | 3.69E-08 | 1.49E-06 | 8.38558789  |
| ITPRIP   | 0.780098519  | 4.467103504 | 5.855141703  | 3.72E-08 | 1.49E-06 | 8.378782961 |
| AANAT    | 0.815773751  | 1.678927891 | 5.851871353  | 3.78E-08 | 1.51E-06 | 8.363839554 |
| IRF7     | 1.043177949  | 5.416582637 | 5.846532575  | 3.88E-08 | 1.55E-06 | 8.339455027 |
| FCAR     | 1.952389729  | 3.726637299 | 5.842240026  | 3.95E-08 | 1.57E-06 | 8.319858336 |
| ZNF114   | -0.758506048 | 1.615716629 | -5.841850187 | 3.96E-08 | 1.57E-06 | 8.31807902  |
| SAMHD1   | 1.765276849  | 7.041226851 | 5.824808119  | 4.30E-08 | 1.70E-06 | 8.240361754 |
| PI4K2A   | 1.009312868  | 2.731147188 | 5.823143872  | 4.33E-08 | 1.71E-06 | 8.232779256 |
| PLPPR2   | 0.916773453  | 4.71332495  | 5.821861628  | 4.36E-08 | 1.72E-06 | 8.226938059 |
| BRI3     | 0.753634606  | 4.142097122 | 5.818942874  | 4.42E-08 | 1.74E-06 | 8.213644589 |
| ITPK1    | 0.662332728  | 4.934491374 | 5.817750729  | 4.44E-08 | 1.75E-06 | 8.208216063 |
| TYROBP   | 1.331879059  | 8.420192138 | 5.805215358  | 4.71E-08 | 1.85E-06 | 8.151174162 |
| ZDHHC9   | -0.669671678 | 4.104839287 | -5.804613758 | 4.73E-08 | 1.85E-06 | 8.148438384 |

|          |              |             |              |          |          |             |
|----------|--------------|-------------|--------------|----------|----------|-------------|
| PPP1R18  | 0.78213124   | 6.500101841 | 5.803102454  | 4.76E-08 | 1.86E-06 | 8.141566444 |
| CAPN2    | 1.152379542  | 5.179673564 | 5.797097267  | 4.90E-08 | 1.91E-06 | 8.114270925 |
| ZNF138   | -0.672644875 | 4.311833695 | -5.796741126 | 4.91E-08 | 1.91E-06 | 8.112652667 |
| RNPEPL1  | 0.75623627   | 5.531318233 | 5.794666323  | 4.95E-08 | 1.92E-06 | 8.103226151 |
| CKAP4    | 1.551550156  | 3.842491992 | 5.78975053   | 5.07E-08 | 1.96E-06 | 8.080899889 |
| NBPF14   | 0.587303463  | 2.0994637   | 5.773355524  | 5.48E-08 | 2.11E-06 | 8.006517508 |
| RELT     | 0.924745634  | 5.080728011 | 5.770453835  | 5.55E-08 | 2.13E-06 | 7.993365627 |
| BLOC1S1  | 0.640091588  | 4.883621373 | 5.769372298  | 5.58E-08 | 2.13E-06 | 7.988464556 |
| TIAM1    | 1.127476748  | 1.645129149 | 5.765631792  | 5.68E-08 | 2.16E-06 | 7.971518274 |
| TRAF1    | 0.783646132  | 3.385148349 | 5.764590738  | 5.71E-08 | 2.17E-06 | 7.966802936 |
| RCBTB2   | 0.954019514  | 4.419327273 | 5.761237369  | 5.80E-08 | 2.20E-06 | 7.951617611 |
| MAML2    | 1.077239441  | 3.097252776 | 5.757262195  | 5.91E-08 | 2.24E-06 | 7.933623188 |
| BIN2     | 0.733384649  | 7.2474826   | 5.749217934  | 6.14E-08 | 2.32E-06 | 7.897231415 |
| DESI1    | 0.624017048  | 4.496755104 | 5.745631191  | 6.24E-08 | 2.34E-06 | 7.881014779 |
| STAR     | -1.087873171 | 3.802772077 | -5.739192714 | 6.44E-08 | 2.40E-06 | 7.851919538 |
| S1PR3    | 1.263994732  | 1.708505766 | 5.738312154  | 6.46E-08 | 2.40E-06 | 7.847941804 |
| ARHGEF1  | 0.712613535  | 6.747356911 | 5.738309673  | 6.46E-08 | 2.40E-06 | 7.847930597 |
| CD83     | 0.946049547  | 4.630808514 | 5.734712317  | 6.57E-08 | 2.44E-06 | 7.831684061 |
| IRAK1BP1 | -0.665625927 | 2.713129458 | -5.732630093 | 6.64E-08 | 2.46E-06 | 7.822282958 |
| PARP9    | 0.779843995  | 4.544839457 | 5.728336395  | 6.77E-08 | 2.50E-06 | 7.80290352  |
| CPPED1   | 0.901411164  | 5.054380153 | 5.717662229  | 7.12E-08 | 2.62E-06 | 7.754763035 |
| ADA2     | 1.378117948  | 6.704439663 | 5.707639782  | 7.46E-08 | 2.73E-06 | 7.709609881 |
| CHST2    | 1.110320167  | 3.517207301 | 5.706971909  | 7.49E-08 | 2.73E-06 | 7.706602638 |
| CEMIP2   | 0.831540299  | 3.526161179 | 5.701675185  | 7.68E-08 | 2.80E-06 | 7.682760318 |
| SERTAD3  | 0.603154658  | 3.757423982 | 5.700538964  | 7.72E-08 | 2.81E-06 | 7.677647509 |
| NEDD9    | 0.851106416  | 3.128009152 | 5.694591726  | 7.93E-08 | 2.88E-06 | 7.650895731 |
| TGFB1    | 0.79532929   | 7.727054924 | 5.688724171  | 8.16E-08 | 2.94E-06 | 7.624518552 |
| GPCPD1   | 0.689178908  | 6.065804439 | 5.680735902  | 8.47E-08 | 3.05E-06 | 7.588633709 |
| PMM1     | 0.75840469   | 2.032967349 | 5.679335646  | 8.52E-08 | 3.06E-06 | 7.582346566 |
| CRIP3    | 0.813120236  | 1.167778945 | 5.676360466  | 8.64E-08 | 3.09E-06 | 7.568991068 |
| SLC6A6   | 0.709938157  | 5.45361585  | 5.675560475  | 8.67E-08 | 3.10E-06 | 7.565400639 |
| GAA      | 1.135066025  | 5.339856175 | 5.672034507  | 8.82E-08 | 3.14E-06 | 7.549579366 |
| KDM5B    | -0.831841366 | 5.705007534 | -5.663032239 | 9.20E-08 | 3.27E-06 | 7.509212016 |
| PTPRC    | 0.760156245  | 7.534960082 | 5.661319685  | 9.27E-08 | 3.29E-06 | 7.501537014 |
| HTR7     | 1.304059526  | 1.453878532 | 5.657831108  | 9.42E-08 | 3.34E-06 | 7.485906835 |
| CSF2RA   | 1.225943405  | 5.141437202 | 5.656414975  | 9.48E-08 | 3.35E-06 | 7.479563643 |
| ADGRD1   | 0.635159636  | 0.602957029 | 5.656289804  | 9.49E-08 | 3.35E-06 | 7.479003021 |
| SEPTIN9  | 0.700945015  | 5.643428609 | 5.655770473  | 9.51E-08 | 3.35E-06 | 7.476677082 |
| MNS1     | -0.673143975 | 2.646466417 | -5.655305722 | 9.53E-08 | 3.35E-06 | 7.474595702 |
| KCNMB1   | 1.090878432  | 2.092498651 | 5.65401741   | 9.59E-08 | 3.37E-06 | 7.468826546 |
| PAICS    | -0.662092965 | 5.829185382 | -5.647885077 | 9.87E-08 | 3.45E-06 | 7.441376243 |
| MAP3K14  | 0.710433304  | 3.988702629 | 5.644423264  | 1.00E-07 | 3.50E-06 | 7.425887892 |
| NRGN     | 1.729340711  | 5.738642237 | 5.644364526  | 1.00E-07 | 3.50E-06 | 7.425625146 |
| DHRS9    | 1.681945147  | 2.857617515 | 5.642456808  | 1.01E-07 | 3.52E-06 | 7.41709238  |
| CEP85L   | 0.959562672  | 2.765529398 | 5.638716326  | 1.03E-07 | 3.58E-06 | 7.400367093 |
| MAD2L1   | -0.658378623 | 3.759244327 | -5.636847206 | 1.04E-07 | 3.60E-06 | 7.392011948 |
| TYMS     | -0.782063845 | 6.430262987 | -5.631351695 | 1.07E-07 | 3.69E-06 | 7.367456066 |

|         |              |             |              |          |          |             |
|---------|--------------|-------------|--------------|----------|----------|-------------|
| PCLAF   | -0.841770054 | 5.272122357 | -5.630691787 | 1.07E-07 | 3.70E-06 | 7.364508326 |
| POR     | 0.717365594  | 3.976913168 | 5.626748757  | 1.09E-07 | 3.76E-06 | 7.346899544 |
| SLC35E4 | 0.676338151  | 1.130052147 | 5.622720434  | 1.11E-07 | 3.82E-06 | 7.32891748  |
| CCND3   | 0.729374277  | 6.391962311 | 5.622625773  | 1.11E-07 | 3.82E-06 | 7.328495014 |
| CLEC17A | 0.80376499   | 1.923756282 | 5.617440164  | 1.14E-07 | 3.90E-06 | 7.305358528 |
| DPYD    | 1.212059165  | 4.926667897 | 5.614775121  | 1.15E-07 | 3.94E-06 | 7.29347296  |
| SHKBP1  | 0.697694913  | 6.58080839  | 5.612748901  | 1.16E-07 | 3.97E-06 | 7.28443868  |
| TICAM1  | 0.705861314  | 4.707214636 | 5.611240164  | 1.17E-07 | 3.99E-06 | 7.277712967 |
| CCDC138 | -0.596775311 | 2.993252468 | -5.607030672 | 1.19E-07 | 4.06E-06 | 7.258953454 |
| SIDT2   | 0.805073078  | 4.685085183 | 5.602973363  | 1.22E-07 | 4.13E-06 | 7.240880144 |
| LYRM7   | -0.648621511 | 4.561675605 | -5.602216063 | 1.22E-07 | 4.14E-06 | 7.237507617 |
| CPED1   | 1.072843882  | 1.204859892 | 5.59725663   | 1.25E-07 | 4.22E-06 | 7.215428276 |
| CENPK   | -0.701657114 | 4.203783768 | -5.593978571 | 1.27E-07 | 4.28E-06 | 7.200840852 |
| SH3BP1  | 0.8604688    | 5.49889499  | 5.591433124  | 1.28E-07 | 4.32E-06 | 7.189517121 |
| CTSB    | 1.012295719  | 6.799956979 | 5.58922137   | 1.30E-07 | 4.35E-06 | 7.179680381 |
| MRVI1   | 0.820544149  | 1.621305751 | 5.587777874  | 1.30E-07 | 4.37E-06 | 7.17326172  |
| ACP2    | 0.658903162  | 4.282247461 | 5.587185687  | 1.31E-07 | 4.38E-06 | 7.17062879  |
| GZMH    | 1.327736541  | 3.070309772 | 5.584391509  | 1.33E-07 | 4.42E-06 | 7.158207814 |
| LIMD2   | 0.708393606  | 6.292400726 | 5.582387917  | 1.34E-07 | 4.45E-06 | 7.149303546 |
| PECAM1  | 1.237520345  | 6.525270106 | 5.579161337  | 1.36E-07 | 4.50E-06 | 7.134968185 |
| CBX7    | 0.600609367  | 3.218508843 | 5.574801565  | 1.39E-07 | 4.58E-06 | 7.115606119 |
| CAP1    | 0.653312095  | 8.214306905 | 5.570630633  | 1.41E-07 | 4.66E-06 | 7.097091277 |
| RASGRP4 | 1.192189283  | 5.714455948 | 5.566374738  | 1.44E-07 | 4.74E-06 | 7.078207922 |
| ADGRE1  | 1.615237154  | 4.210490769 | 5.562925788  | 1.46E-07 | 4.80E-06 | 7.062911383 |
| FCGR1A  | 1.256557763  | 3.174202038 | 5.555538265  | 1.51E-07 | 4.95E-06 | 7.030166105 |
| TRIM8   | 0.714913672  | 6.258041423 | 5.551800564  | 1.54E-07 | 5.02E-06 | 7.013608762 |
| ZNF660  | -0.780387405 | 3.738619893 | -5.548245104 | 1.57E-07 | 5.10E-06 | 6.997864993 |
| SNTB2   | 0.821380053  | 2.000947153 | 5.544965357  | 1.59E-07 | 5.15E-06 | 6.98334753  |
| TMEM63B | 0.790058678  | 3.68528116  | 5.537873285  | 1.64E-07 | 5.31E-06 | 6.951973053 |
| SH2D3C  | 1.006246594  | 5.395263747 | 5.536884072  | 1.65E-07 | 5.33E-06 | 6.947598835 |
| POLR3G  | -0.640011737 | 2.814148392 | -5.53303185  | 1.68E-07 | 5.40E-06 | 6.930569163 |
| TAP1    | 0.702071304  | 5.390794118 | 5.532890121  | 1.68E-07 | 5.40E-06 | 6.929942756 |
| RELB    | 0.744721775  | 3.841988545 | 5.530185572  | 1.70E-07 | 5.46E-06 | 6.91799115  |
| KMO     | 0.687979792  | 1.929862187 | 5.52851625   | 1.72E-07 | 5.49E-06 | 6.910616068 |
| ACPP    | 1.274169945  | 3.363903568 | 5.525494884  | 1.74E-07 | 5.56E-06 | 6.897271097 |
| DUSP6   | 1.427391307  | 6.221837491 | 5.524250615  | 1.75E-07 | 5.58E-06 | 6.89177662  |
| CD1E    | 1.30159206   | 1.004033052 | 5.522977342  | 1.76E-07 | 5.61E-06 | 6.886154847 |
| RIN2    | 1.241432166  | 2.534822554 | 5.519563559  | 1.79E-07 | 5.69E-06 | 6.871086174 |
| MAP2K1  | 0.641614972  | 5.353249431 | 5.517204311  | 1.81E-07 | 5.73E-06 | 6.860675613 |
| FPR2    | 1.597254687  | 2.345868024 | 5.51536166   | 1.82E-07 | 5.76E-06 | 6.852546515 |
| CMBL    | -1.017810447 | 3.843238225 | -5.514157858 | 1.83E-07 | 5.78E-06 | 6.847236678 |
| NFAM1   | 1.86577934   | 4.829114395 | 5.51145431   | 1.86E-07 | 5.84E-06 | 6.835314214 |
| RIPOR1  | 0.669849014  | 5.44935332  | 5.509018613  | 1.88E-07 | 5.88E-06 | 6.824576022 |
| NOTCH2  | 0.981771533  | 5.69612951  | 5.505659357  | 1.91E-07 | 5.96E-06 | 6.809770923 |
| SIRPD   | 1.277582594  | 1.716863208 | 5.505606135  | 1.91E-07 | 5.96E-06 | 6.809536401 |
| KCNC3   | 1.137026577  | 1.472291828 | 5.503202212  | 1.93E-07 | 6.01E-06 | 6.798945157 |
| BATF2   | 0.730942703  | 0.986689177 | 5.495011778  | 2.00E-07 | 6.22E-06 | 6.762880895 |

|            |               |              |               |           |           |              |
|------------|---------------|--------------|---------------|-----------|-----------|--------------|
| PTAFR      | 1. 629905838  | 4. 962578672 | 5. 487348904  | 2. 07E-07 | 6. 44E-06 | 6. 729169448 |
| CDC42EP3   | 1. 266094718  | 4. 271784698 | 5. 484376854  | 2. 10E-07 | 6. 51E-06 | 6. 716102224 |
| G6PD       | 0. 767271423  | 6. 157802109 | 5. 472765975  | 2. 22E-07 | 6. 82E-06 | 6. 665094383 |
| PSTPIP1    | 1. 048457459  | 4. 858259303 | 5. 471970507  | 2. 22E-07 | 6. 83E-06 | 6. 661602242 |
| GPR155     | 0. 805226735  | 2. 495819983 | 5. 469975275  | 2. 25E-07 | 6. 88E-06 | 6. 652844465 |
| PDLIM2     | 0. 704406547  | 3. 143425033 | 5. 468253442  | 2. 26E-07 | 6. 92E-06 | 6. 645288313 |
| ARHGAP31   | 1. 074362259  | 2. 588767677 | 5. 467142721  | 2. 27E-07 | 6. 94E-06 | 6. 640414763 |
| TCP11L2    | 0. 712044801  | 3. 511589773 | 5. 458182585  | 2. 37E-07 | 7. 22E-06 | 6. 601122425 |
| CCR2       | 1. 999539292  | 3. 989666273 | 5. 449252567  | 2. 47E-07 | 7. 49E-06 | 6. 56200179  |
| AHI1       | -0. 594409096 | 3. 490189412 | -5. 44048107  | 2. 57E-07 | 7. 79E-06 | 6. 523614217 |
| SIRPG      | 0. 943212202  | 2. 172632281 | 5. 439905566  | 2. 58E-07 | 7. 80E-06 | 6. 52109692  |
| ISG20      | 0. 91782374   | 2. 95057698  | 5. 438358446  | 2. 59E-07 | 7. 84E-06 | 6. 514330525 |
| TMEM38A    | 0. 846905491  | 1. 364118067 | 5. 433263804  | 2. 66E-07 | 8. 01E-06 | 6. 49205733  |
| SLC22A18   | 0. 850893451  | 2. 727337272 | 5. 432315228  | 2. 67E-07 | 8. 03E-06 | 6. 487911691 |
| DEPP1      | 1. 029125268  | 3. 176148014 | 5. 431505884  | 2. 68E-07 | 8. 05E-06 | 6. 48437491  |
| S1PR5      | 0. 907017634  | 1. 684389511 | 5. 43115976   | 2. 68E-07 | 8. 05E-06 | 6. 482862469 |
| BLVRA      | 1. 323098023  | 4. 257384028 | 5. 430929791  | 2. 68E-07 | 8. 05E-06 | 6. 481857618 |
| JAZF1      | 1. 010918418  | 3. 56795389  | 5. 425494248  | 2. 75E-07 | 8. 22E-06 | 6. 458114672 |
| LILRA2     | 1. 321072297  | 4. 77350802  | 5. 419993402  | 2. 82E-07 | 8. 42E-06 | 6. 434101529 |
| AKAP13     | 0. 632989989  | 5. 7125159   | 5. 419352252  | 2. 83E-07 | 8. 43E-06 | 6. 431303665 |
| ST3GAL5    | 0. 911215032  | 3. 468989217 | 5. 414888963  | 2. 89E-07 | 8. 58E-06 | 6. 4118324   |
| ICAM1      | 1. 026843295  | 4. 030184653 | 5. 414816764  | 2. 89E-07 | 8. 58E-06 | 6. 41151751  |
| STX16-NPEF | 0. 639335952  | 2. 386572595 | 5. 411477872  | 2. 93E-07 | 8. 70E-06 | 6. 396958123 |
| CENPH      | -0. 612399247 | 4. 1948333   | -5. 40753047  | 2. 99E-07 | 8. 84E-06 | 6. 379752522 |
| CD36       | 1. 809480275  | 4. 978541522 | 5. 403879939  | 3. 04E-07 | 8. 97E-06 | 6. 363847869 |
| CD5        | 1. 062485205  | 3. 298699325 | 5. 403700951  | 3. 04E-07 | 8. 97E-06 | 6. 363068227 |
| SLA        | 1. 056019705  | 5. 03414878  | 5. 401308783  | 3. 07E-07 | 9. 06E-06 | 6. 352649863 |
| ARHGAP9    | 0. 641301643  | 6. 252115692 | 5. 398986988  | 3. 10E-07 | 9. 14E-06 | 6. 342540747 |
| TAGLN      | 0. 780297833  | 3. 701632326 | 5. 397642063  | 3. 12E-07 | 9. 18E-06 | 6. 33668617  |
| WDR31      | -0. 649223878 | 2. 405144535 | -5. 393062679 | 3. 19E-07 | 9. 36E-06 | 6. 316758553 |
| CASP6      | -0. 631890595 | 5. 213041028 | -5. 391876592 | 3. 21E-07 | 9. 40E-06 | 6. 311598908 |
| GRINA      | 0. 733706868  | 6. 891800304 | 5. 390892195  | 3. 22E-07 | 9. 42E-06 | 6. 307317184 |
| CYP1B1     | 1. 578682075  | 2. 426508509 | 5. 384593675  | 3. 31E-07 | 9. 65E-06 | 6. 279932769 |
| ARNTL      | 0. 897300282  | 3. 075388581 | 5. 379467707  | 3. 39E-07 | 9. 85E-06 | 6. 257661125 |
| EXT1       | 0. 800982565  | 1. 35437553  | 5. 375781691  | 3. 45E-07 | 1. 00E-05 | 6. 241654096 |
| HECA       | 0. 589808821  | 5. 379087477 | 5. 374318394  | 3. 47E-07 | 1. 01E-05 | 6. 235301439 |
| KLRD1      | 0. 838944909  | 1. 783325612 | 5. 372413078  | 3. 50E-07 | 1. 01E-05 | 6. 227031457 |
| IER5L      | 0. 760455923  | 2. 07073051  | 5. 371668917  | 3. 51E-07 | 1. 01E-05 | 6. 223801943 |
| ID2        | 1. 318694531  | 5. 499037713 | 5. 367956483  | 3. 57E-07 | 1. 03E-05 | 6. 20769489  |
| UBE2D1     | 0. 781712809  | 4. 663274446 | 5. 367839386  | 3. 58E-07 | 1. 03E-05 | 6. 207186959 |
| PIK3IP1    | 0. 880333417  | 4. 806297911 | 5. 364932463  | 3. 62E-07 | 1. 04E-05 | 6. 194579814 |
| RNF149     | 0. 618695887  | 5. 946749143 | 5. 362368266  | 3. 67E-07 | 1. 05E-05 | 6. 183462616 |
| APOBR      | 1. 026682085  | 5. 659912954 | 5. 357308418  | 3. 75E-07 | 1. 07E-05 | 6. 161535211 |
| PLEKHA5    | -0. 827036492 | 3. 397721068 | -5. 354260104 | 3. 80E-07 | 1. 09E-05 | 6. 148331294 |
| CRIP1      | 1. 042814159  | 2. 768382449 | 5. 347881892  | 3. 91E-07 | 1. 11E-05 | 6. 120719089 |
| TGFBI      | 1. 716079633  | 2. 420146301 | 5. 346255162  | 3. 94E-07 | 1. 12E-05 | 6. 11368006  |
| SLFN5      | 1. 005770445  | 2. 91429314  | 5. 345645321  | 3. 95E-07 | 1. 12E-05 | 6. 111041563 |

|          |               |              |               |           |           |              |
|----------|---------------|--------------|---------------|-----------|-----------|--------------|
| ETS1     | 1. 022418721  | 4. 65559004  | 5. 343916647  | 3. 98E-07 | 1. 13E-05 | 6. 103563427 |
| TNNI2    | 1. 344724482  | 2. 286635468 | 5. 343557444  | 3. 99E-07 | 1. 13E-05 | 6. 10200973  |
| STK10    | 0. 60047638   | 6. 227385701 | 5. 341025491  | 4. 04E-07 | 1. 14E-05 | 6. 091059882 |
| CHST7    | 0. 744178832  | 2. 090390573 | 5. 339811875  | 4. 06E-07 | 1. 14E-05 | 6. 085812559 |
| PFKFB3   | 0. 739649091  | 4. 720387861 | 5. 339788062  | 4. 06E-07 | 1. 14E-05 | 6. 085709608 |
| MAN1C1   | 0. 721735302  | 1. 702334219 | 5. 339704865  | 4. 06E-07 | 1. 14E-05 | 6. 085349915 |
| SOD2     | 0. 802648984  | 4. 396461445 | 5. 338372843  | 4. 09E-07 | 1. 15E-05 | 6. 079591584 |
| CD27     | 0. 823291134  | 3. 435622954 | 5. 33811754   | 4. 09E-07 | 1. 15E-05 | 6. 078488009 |
| ARHGAP26 | 0. 838064612  | 4. 232097788 | 5. 335419502  | 4. 14E-07 | 1. 16E-05 | 6. 066827519 |
| RUFY4    | 0. 892319504  | 0. 969611965 | 5. 326730418  | 4. 31E-07 | 1. 20E-05 | 6. 029300005 |
| DMPK     | 0. 848828532  | 1. 748038919 | 5. 321499705  | 4. 41E-07 | 1. 23E-05 | 6. 006727605 |
| TNFSF12  | 1. 225511857  | 3. 125894119 | 5. 304196212  | 4. 77E-07 | 1. 31E-05 | 5. 932157052 |
| GRK6     | 0. 654755457  | 6. 016918683 | 5. 303778895  | 4. 77E-07 | 1. 31E-05 | 5. 930360501 |
| ICOS     | 0. 813569855  | 1. 592425246 | 5. 30261879   | 4. 80E-07 | 1. 32E-05 | 5. 925366716 |
| CD40     | 1. 009419733  | 2. 520841476 | 5. 30258535   | 4. 80E-07 | 1. 32E-05 | 5. 925222782 |
| ISG15    | 0. 987970648  | 4. 278140893 | 5. 302298835  | 4. 81E-07 | 1. 32E-05 | 5. 923989565 |
| WRN      | -0. 607264612 | 4. 645307106 | -5. 297528749 | 4. 91E-07 | 1. 34E-05 | 5. 903464356 |
| AIF1     | 0. 869219627  | 7. 835952418 | 5. 295310738  | 4. 96E-07 | 1. 35E-05 | 5. 893924478 |
| MEGF9    | 1. 172730677  | 5. 259485285 | 5. 294436747  | 4. 98E-07 | 1. 36E-05 | 5. 890166057 |
| IL4R     | 0. 841586877  | 4. 892206994 | 5. 291518402  | 5. 04E-07 | 1. 37E-05 | 5. 877619163 |
| ZNF366   | 0. 831004641  | 1. 062885044 | 5. 287396864  | 5. 14E-07 | 1. 40E-05 | 5. 859906872 |
| SERTAD1  | 0. 62597282   | 2. 922549773 | 5. 287136092  | 5. 15E-07 | 1. 40E-05 | 5. 858786501 |
| RHOG     | 0. 674530973  | 7. 922617139 | 5. 28094593   | 5. 29E-07 | 1. 43E-05 | 5. 832201673 |
| GMIP     | 0. 648738288  | 6. 658274326 | 5. 27966688   | 5. 32E-07 | 1. 44E-05 | 5. 826711028 |
| CD200R1  | 1. 052606059  | 2. 099388365 | 5. 275841474  | 5. 41E-07 | 1. 46E-05 | 5. 810294569 |
| PSMB9    | 0. 685764941  | 4. 691135002 | 5. 273878731  | 5. 46E-07 | 1. 47E-05 | 5. 801874544 |
| SELPLG   | 0. 933945625  | 7. 445011457 | 5. 273767785  | 5. 46E-07 | 1. 47E-05 | 5. 801398652 |
| HLA-DMB  | 1. 473686348  | 4. 793624578 | 5. 271377984  | 5. 52E-07 | 1. 48E-05 | 5. 791149423 |
| ADCY7    | 1. 067132529  | 5. 104499544 | 5. 266481545  | 5. 64E-07 | 1. 52E-05 | 5. 770159155 |
| KDM7A    | 0. 991422255  | 3. 878429953 | 5. 264712351  | 5. 69E-07 | 1. 53E-05 | 5. 762577967 |
| TMEM120A | 0. 68442347   | 3. 988183242 | 5. 264141448  | 5. 70E-07 | 1. 53E-05 | 5. 760131931 |
| PCDH12   | 0. 67495398   | 1. 872310533 | 5. 263288452  | 5. 73E-07 | 1. 53E-05 | 5. 756477589 |
| HLA-B    | 0. 756581846  | 9. 869247975 | 5. 26322095   | 5. 73E-07 | 1. 53E-05 | 5. 756188416 |
| CALHM2   | 0. 917225448  | 4. 511265773 | 5. 262913427  | 5. 74E-07 | 1. 53E-05 | 5. 754871051 |
| PDE4A    | 1. 157252585  | 2. 198651345 | 5. 253968642  | 5. 97E-07 | 1. 58E-05 | 5. 716575032 |
| RGS14    | 0. 806245898  | 5. 29516835  | 5. 249454181  | 6. 09E-07 | 1. 62E-05 | 5. 697262766 |
| FGD6     | 0. 947300969  | 1. 984201415 | 5. 247745637  | 6. 14E-07 | 1. 62E-05 | 5. 689956621 |
| CPAMD8   | 0. 717582016  | 0. 830138972 | 5. 245338723  | 6. 20E-07 | 1. 63E-05 | 5. 679666664 |
| CAMK1    | 1. 053798398  | 2. 334759533 | 5. 245125349  | 6. 21E-07 | 1. 63E-05 | 5. 678754602 |
| DEF8     | 0. 672425061  | 4. 13572961  | 5. 241086197  | 6. 32E-07 | 1. 66E-05 | 5. 661493824 |
| IPCEF1   | 0. 968864297  | 2. 515343029 | 5. 240398825  | 6. 34E-07 | 1. 66E-05 | 5. 658557281 |
| C3       | 0. 666500196  | 0. 843849365 | 5. 234551482  | 6. 51E-07 | 1. 70E-05 | 5. 63358669  |
| CCR7     | 1. 13769628   | 3. 639490898 | 5. 233867555  | 6. 53E-07 | 1. 70E-05 | 5. 630667207 |
| SIT1     | 0. 941677873  | 2. 751298247 | 5. 233474159  | 6. 54E-07 | 1. 70E-05 | 5. 628988026 |
| ALOX5    | 1. 62206701   | 5. 458798386 | 5. 23164332   | 6. 60E-07 | 1. 71E-05 | 5. 621174304 |
| LYN      | 0. 760332374  | 6. 598695186 | 5. 231496708  | 6. 60E-07 | 1. 71E-05 | 5. 62054866  |
| PTPRJ    | 1. 272201406  | 4. 429822461 | 5. 230331093  | 6. 63E-07 | 1. 72E-05 | 5. 615575011 |

|          |              |             |              |          |          |             |
|----------|--------------|-------------|--------------|----------|----------|-------------|
| RIN1     | 0.997057763  | 2.352769366 | 5.227572846  | 6.72E-07 | 1.74E-05 | 5.603808486 |
| CENPU    | -0.69221735  | 5.376229277 | -5.227134626 | 6.73E-07 | 1.74E-05 | 5.60193943  |
| PID1     | 1.023616577  | 1.097646982 | 5.222290093  | 6.88E-07 | 1.77E-05 | 5.581283717 |
| FGD4     | 1.355226103  | 3.06556247  | 5.220220293  | 6.94E-07 | 1.79E-05 | 5.572462442 |
| IFI44L   | 1.575913473  | 2.290081963 | 5.219885585  | 6.95E-07 | 1.79E-05 | 5.571036164 |
| CD37     | 0.671821125  | 7.306479774 | 5.215638372  | 7.08E-07 | 1.81E-05 | 5.552942794 |
| MCEMP1   | 1.465205305  | 3.912467619 | 5.215508709  | 7.09E-07 | 1.81E-05 | 5.552390572 |
| PARP12   | 0.698933046  | 4.451106803 | 5.21249015   | 7.18E-07 | 1.83E-05 | 5.539537317 |
| HLA-C    | 0.680476743  | 9.103754114 | 5.21004715   | 7.26E-07 | 1.85E-05 | 5.529138363 |
| CCDC88B  | 0.987324995  | 5.217910386 | 5.207067346  | 7.36E-07 | 1.87E-05 | 5.51645869  |
| SLAMF7   | 1.133260373  | 3.272258668 | 5.202655038  | 7.51E-07 | 1.91E-05 | 5.497692031 |
| ARPC1B   | 0.743159902  | 7.015667008 | 5.201123311  | 7.56E-07 | 1.91E-05 | 5.49117962  |
| SHTN1    | 1.386125509  | 1.810420318 | 5.200572975  | 7.58E-07 | 1.92E-05 | 5.488840067 |
| EPB41L3  | 1.363908977  | 1.288164705 | 5.191459201  | 7.89E-07 | 1.99E-05 | 5.45011954  |
| PLXNB2   | 0.934023176  | 6.963815539 | 5.185520483  | 8.10E-07 | 2.04E-05 | 5.424912155 |
| CLEC4E   | 1.68768167   | 2.27231661  | 5.183356972  | 8.18E-07 | 2.05E-05 | 5.415733608 |
| S100A10  | 1.706163056  | 6.32798947  | 5.178721843  | 8.35E-07 | 2.09E-05 | 5.396077752 |
| EPDR1    | -0.841870208 | 4.904265331 | -5.174167209 | 8.52E-07 | 2.13E-05 | 5.376774372 |
| P2RX7    | 0.998881324  | 4.362406599 | 5.172060462  | 8.60E-07 | 2.14E-05 | 5.367849324 |
| BCL2L11  | 0.858144805  | 3.444237968 | 5.169936982  | 8.68E-07 | 2.16E-05 | 5.358855784 |
| FCMR     | 1.043281622  | 4.768723256 | 5.169818711  | 8.68E-07 | 2.16E-05 | 5.358354942 |
| ALDH18A1 | -0.58741943  | 5.848823962 | -5.168952219 | 8.72E-07 | 2.16E-05 | 5.354685846 |
| SIGLEC14 | 1.297452899  | 4.806286001 | 5.168792319  | 8.72E-07 | 2.16E-05 | 5.354008804 |
| PTTG2    | 0.665182204  | 1.654831213 | 5.16784318   | 8.76E-07 | 2.17E-05 | 5.349990289 |
| ZCWPW1   | 0.637819818  | 3.577620512 | 5.16591995   | 8.83E-07 | 2.18E-05 | 5.341849083 |
| PFKFB4   | 0.943655153  | 3.267448177 | 5.162229028  | 8.98E-07 | 2.21E-05 | 5.326230604 |
| CORO1A   | 0.794989727  | 7.907143827 | 5.160290334  | 9.06E-07 | 2.23E-05 | 5.318029753 |
| RHOB     | 1.329224457  | 6.336828541 | 5.159879858  | 9.07E-07 | 2.23E-05 | 5.316293657 |
| WIPI1    | 0.813574087  | 3.212956555 | 5.158966054  | 9.11E-07 | 2.24E-05 | 5.312429082 |
| HLA-DRB1 | 1.60061954   | 8.392535262 | 5.151998211  | 9.40E-07 | 2.30E-05 | 5.282975989 |
| TOM1     | 0.700147397  | 4.725915838 | 5.150905195  | 9.44E-07 | 2.31E-05 | 5.278358164 |
| ARHGEF3  | 0.743586842  | 4.526246027 | 5.145944102  | 9.65E-07 | 2.35E-05 | 5.257406346 |
| SMCO4    | 1.066571264  | 4.116323225 | 5.145816949  | 9.66E-07 | 2.35E-05 | 5.256869527 |
| GZMA     | 1.104915588  | 3.88794326  | 5.141797644  | 9.83E-07 | 2.39E-05 | 5.239905038 |
| NPEPL1   | 0.648593703  | 3.386423924 | 5.138967852  | 9.95E-07 | 2.42E-05 | 5.227966389 |
| SPC25    | -0.68420453  | 3.450766308 | -5.138391414 | 9.98E-07 | 2.42E-05 | 5.225534971 |
| ARAP3    | 1.244527297  | 2.995085263 | 5.136722293  | 1.01E-06 | 2.44E-05 | 5.218495627 |
| CR1      | 1.507458679  | 2.757106434 | 5.130251946  | 1.03E-06 | 2.50E-05 | 5.191221753 |
| UNG      | -0.623111729 | 5.459445432 | -5.125452861 | 1.06E-06 | 2.55E-05 | 5.171007146 |
| RNF157   | 0.728055555  | 1.53649929  | 5.125419122  | 1.06E-06 | 2.55E-05 | 5.170865077 |
| SERPINB9 | 1.298984697  | 4.441255004 | 5.124802297  | 1.06E-06 | 2.55E-05 | 5.168267808 |
| GPR35    | 0.851641677  | 2.561719693 | 5.123162386  | 1.07E-06 | 2.57E-05 | 5.161363625 |
| IFNK     | 0.819541636  | 1.430294495 | 5.122483141  | 1.07E-06 | 2.57E-05 | 5.158504364 |
| TMSB4X   | 0.614765135  | 9.891855347 | 5.120957836  | 1.08E-06 | 2.58E-05 | 5.152084543 |
| LRRC34   | -0.682172812 | 2.400117837 | -5.12039915  | 1.08E-06 | 2.58E-05 | 5.149733417 |
| CEP41    | -0.587044    | 3.105974717 | -5.120312911 | 1.08E-06 | 2.58E-05 | 5.149370513 |
| CBLN3    | 0.597948643  | 1.333940439 | 5.115977188  | 1.10E-06 | 2.63E-05 | 5.131130349 |

|           |              |             |              |          |          |             |
|-----------|--------------|-------------|--------------|----------|----------|-------------|
| IFIT3     | 0.963418157  | 3.798019871 | 5.114278547  | 1.11E-06 | 2.64E-05 | 5.12398702  |
| RIN3      | 0.656658459  | 5.958027371 | 5.113840828  | 1.11E-06 | 2.64E-05 | 5.122146524 |
| PTGS2     | 1.397374262  | 3.796980922 | 5.112934819  | 1.12E-06 | 2.64E-05 | 5.118337318 |
| FOXO1     | 1.15016499   | 3.636399279 | 5.112929576  | 1.12E-06 | 2.64E-05 | 5.118315275 |
| FOLR3     | 1.226371682  | 1.401628761 | 5.112745003  | 1.12E-06 | 2.64E-05 | 5.117539314 |
| IL24      | 0.887208711  | 2.719323128 | 5.106411491  | 1.15E-06 | 2.71E-05 | 5.090923864 |
| TUBA4A    | 1.210963222  | 4.333136835 | 5.104675958  | 1.16E-06 | 2.73E-05 | 5.083634383 |
| SLAMF1    | 0.786426574  | 1.968709657 | 5.086200977  | 1.26E-06 | 2.94E-05 | 5.00613807  |
| RAB29     | 0.763206987  | 4.251233131 | 5.079448673  | 1.29E-06 | 3.03E-05 | 4.977860691 |
| FERMT3    | 0.661486983  | 7.569900677 | 5.078902254  | 1.30E-06 | 3.03E-05 | 4.975573474 |
| AGTRAP    | 0.950344811  | 5.675226034 | 5.076545508  | 1.31E-06 | 3.06E-05 | 4.965710409 |
| QPCT      | 1.410815265  | 2.227826729 | 5.069604887  | 1.35E-06 | 3.15E-05 | 4.936681251 |
| CLCN5     | 0.909590245  | 2.431983634 | 5.066863157  | 1.37E-06 | 3.18E-05 | 4.925221206 |
| IL12RB1   | 0.944842116  | 3.551821413 | 5.064159421  | 1.38E-06 | 3.21E-05 | 4.913923988 |
| SH2D1B    | 0.762772996  | 1.413644902 | 5.061976696  | 1.40E-06 | 3.24E-05 | 4.904806661 |
| IRF4      | 1.016538856  | 2.709615396 | 5.061497233  | 1.40E-06 | 3.24E-05 | 4.902804275 |
| TNFRSF14  | 0.92036925   | 4.947337915 | 5.05549118   | 1.44E-06 | 3.32E-05 | 4.877973557 |
| GOS2      | 1.632497132  | 2.389957301 | 5.055067919  | 1.44E-06 | 3.32E-05 | 4.875965611 |
| ZNF273    | -0.716161981 | 3.143555416 | -5.052726114 | 1.45E-06 | 3.35E-05 | 4.866195554 |
| RAB11FIP4 | 0.677779755  | 1.809958459 | 5.051662114  | 1.46E-06 | 3.36E-05 | 4.861757519 |
| GABBR1    | 1.512947734  | 3.468308797 | 5.050626104  | 1.47E-06 | 3.37E-05 | 4.857436825 |
| EPS8      | 1.278275773  | 2.167072984 | 5.048271794  | 1.48E-06 | 3.40E-05 | 4.847620335 |
| SLC37A3   | 0.757379505  | 1.643015083 | 5.044010569  | 1.51E-06 | 3.46E-05 | 4.829860541 |
| OGFRL1    | 0.924806677  | 4.912040448 | 5.043192402  | 1.52E-06 | 3.47E-05 | 4.82645175  |
| CST3      | 1.56767375   | 6.849885462 | 5.039181211  | 1.54E-06 | 3.52E-05 | 4.809744951 |
| GNB2      | 0.597689322  | 6.805626854 | 5.03807607   | 1.55E-06 | 3.53E-05 | 4.805143543 |
| ALDH5A1   | -0.814137327 | 4.385145854 | -5.037679073 | 1.55E-06 | 3.53E-05 | 4.803490753 |
| CPVL      | 1.6546663    | 4.473917581 | 5.035470084  | 1.57E-06 | 3.56E-05 | 4.794295809 |
| BICDL1    | 0.668174958  | 1.671430122 | 5.025065473  | 1.64E-06 | 3.70E-05 | 4.751022614 |
| CD68      | 0.778147055  | 1.972828693 | 5.020324102  | 1.67E-06 | 3.77E-05 | 4.731322856 |
| RNASE6    | 1.754141012  | 5.996590633 | 5.019230673  | 1.68E-06 | 3.78E-05 | 4.726781567 |
| CDCA7L    | -0.751586672 | 5.333160083 | -5.018841271 | 1.69E-06 | 3.78E-05 | 4.72516444  |
| OR52K2    | 1.13730695   | 1.435587744 | 5.016332164  | 1.70E-06 | 3.82E-05 | 4.714746513 |
| MTHFD1L   | -0.650294572 | 4.529466333 | -5.015990695 | 1.71E-06 | 3.82E-05 | 4.713328986 |
| CSF1R     | 1.307222942  | 6.339339396 | 5.011474145  | 1.74E-06 | 3.88E-05 | 4.694585686 |
| BBC3      | 0.611595992  | 2.393037945 | 5.006573035  | 1.78E-06 | 3.95E-05 | 4.674259268 |
| ARHGEF11  | 1.399096566  | 3.607491639 | 5.005873372  | 1.78E-06 | 3.96E-05 | 4.671358631 |
| NLRP3     | 0.988042109  | 4.987100716 | 5.002117359  | 1.81E-06 | 4.01E-05 | 4.655791742 |
| TP53BP1   | -0.586241213 | 4.420865244 | -5.001749306 | 1.82E-06 | 4.01E-05 | 4.654266757 |
| DGKA      | 0.610248629  | 4.755215203 | 5.00058135   | 1.82E-06 | 4.03E-05 | 4.649427967 |
| METAP1D   | -0.599988067 | 3.688895941 | -4.999080357 | 1.84E-06 | 4.04E-05 | 4.643210529 |
| SNX25     | 0.838810126  | 1.524095317 | 4.994742583  | 1.87E-06 | 4.12E-05 | 4.625249562 |
| PAK1      | 0.86279425   | 5.556851513 | 4.993865287  | 1.88E-06 | 4.13E-05 | 4.621618304 |
| TEDC1     | 0.733010237  | 2.788610537 | 4.992920948  | 1.89E-06 | 4.14E-05 | 4.617710022 |
| ASPHD2    | 0.609786596  | 2.319940704 | 4.992241098  | 1.89E-06 | 4.14E-05 | 4.614896673 |
| KIF1C     | 0.803203197  | 3.084379362 | 4.987252941  | 1.93E-06 | 4.21E-05 | 4.594262585 |
| ZNF85     | -0.677402475 | 3.443608212 | -4.986765568 | 1.94E-06 | 4.21E-05 | 4.592247251 |



|         |              |             |              |          |          |             |
|---------|--------------|-------------|--------------|----------|----------|-------------|
| FCRL6   | 0.971356592  | 2.398626527 | 4.984822546  | 1.95E-06 | 4.24E-05 | 4.584213991 |
| BLVRB   | 1.089169576  | 5.750857815 | 4.984430711  | 1.96E-06 | 4.24E-05 | 4.582594237 |
| CD247   | 0.973948582  | 2.978758849 | 4.984204759  | 1.96E-06 | 4.24E-05 | 4.581660243 |
| PREX1   | 0.694718541  | 6.625880698 | 4.977589496  | 2.02E-06 | 4.34E-05 | 4.554328028 |
| H2AFJ   | 1.059573277  | 3.124568811 | 4.976382874  | 2.03E-06 | 4.35E-05 | 4.549345271 |
| MND1    | -0.686193621 | 3.446220124 | -4.975205304 | 2.04E-06 | 4.37E-05 | 4.544483267 |
| ANKRD27 | -0.685781191 | 5.406489645 | -4.974538061 | 2.04E-06 | 4.38E-05 | 4.541728666 |
| CDKN2B  | 0.881094429  | 1.153040081 | 4.974201507  | 2.05E-06 | 4.38E-05 | 4.540339356 |
| KCNQ5   | -1.077043688 | 3.928254486 | -4.971372901 | 2.07E-06 | 4.42E-05 | 4.528665227 |
| NFKBIA  | 0.70218856   | 7.066502596 | 4.969827915  | 2.09E-06 | 4.44E-05 | 4.522290697 |
| IFITM10 | 0.73465063   | 1.337152899 | 4.969526009  | 2.09E-06 | 4.45E-05 | 4.521045206 |
| TRPV4   | 0.636065539  | 0.482502313 | 4.968280688  | 2.10E-06 | 4.45E-05 | 4.515908258 |
| IL2RB   | 1.101651971  | 3.794522532 | 4.964670699  | 2.13E-06 | 4.51E-05 | 4.50102196  |
| SIPA1   | 0.721417999  | 6.606327413 | 4.964593958  | 2.13E-06 | 4.51E-05 | 4.500705587 |
| POLE2   | -0.585694988 | 4.268390912 | -4.957344535 | 2.20E-06 | 4.63E-05 | 4.470833898 |
| GOLGA8N | -0.727359438 | 3.312459848 | -4.953771091 | 2.23E-06 | 4.70E-05 | 4.456120133 |
| GPT2    | -1.114290226 | 3.792895552 | -4.953290746 | 2.24E-06 | 4.70E-05 | 4.454142844 |
| ACOT9   | 0.651530451  | 4.231825351 | 4.94540214   | 2.32E-06 | 4.84E-05 | 4.421688754 |
| ABCA7   | 0.933319907  | 5.174789045 | 4.944760654  | 2.32E-06 | 4.85E-05 | 4.419051185 |
| IRF2BPL | 0.642067164  | 4.15996724  | 4.942404193  | 2.35E-06 | 4.88E-05 | 4.409364223 |
| MAL     | 1.132666323  | 2.271359421 | 4.939678778  | 2.38E-06 | 4.91E-05 | 4.398164454 |
| C9orf43 | -1.171189317 | 3.183069606 | -4.939654669 | 2.38E-06 | 4.91E-05 | 4.398065401 |
| MPZL3   | 0.645136413  | 2.634933954 | 4.939349608  | 2.38E-06 | 4.91E-05 | 4.396812051 |
| NREP    | -0.701357514 | 5.67287383  | -4.937228265 | 2.40E-06 | 4.95E-05 | 4.388097928 |
| SBN02   | 0.638195022  | 5.133997768 | 4.935209082  | 2.42E-06 | 4.98E-05 | 4.379805814 |
| HORMAD1 | 0.876385355  | 1.475646376 | 4.935137189  | 2.42E-06 | 4.98E-05 | 4.379510619 |
| PLAAT4  | 0.767489419  | 4.401109127 | 4.933962102  | 2.43E-06 | 5.00E-05 | 4.37468603  |
| SPOCK2  | 1.04621251   | 4.148595906 | 4.933096918  | 2.44E-06 | 5.02E-05 | 4.371134315 |
| YPEL3   | 0.641056777  | 5.59276357  | 4.923816574  | 2.54E-06 | 5.20E-05 | 4.333063613 |
| RGS9BP  | -0.668715703 | 0.854319345 | -4.923504756 | 2.55E-06 | 5.21E-05 | 4.331785291 |
| ABCD1   | 0.711376887  | 4.409227841 | 4.92309408   | 2.55E-06 | 5.21E-05 | 4.330101772 |
| SLC43A1 | -0.610621441 | 5.34114339  | -4.921899511 | 2.56E-06 | 5.22E-05 | 4.325205313 |
| SLC31A1 | 0.650295927  | 4.050980923 | 4.918520147  | 2.60E-06 | 5.29E-05 | 4.311357898 |
| LGALS1  | 1.47704558   | 7.670338398 | 4.914977075  | 2.64E-06 | 5.35E-05 | 4.296846599 |
| ETV7    | 0.597649597  | 0.627806503 | 4.912106717  | 2.67E-06 | 5.40E-05 | 4.285095725 |
| CLEC10A | 1.712030699  | 2.091705368 | 4.899593599  | 2.82E-06 | 5.68E-05 | 4.233923174 |
| IRF1    | 0.661252441  | 5.688114636 | 4.894364408  | 2.89E-06 | 5.79E-05 | 4.212564652 |
| SGMS2   | 1.374295016  | 2.44308821  | 4.891998102  | 2.92E-06 | 5.84E-05 | 4.202904627 |
| OR52K1  | 0.726348782  | 0.734311087 | 4.89076831   | 2.93E-06 | 5.87E-05 | 4.197885478 |
| SRD5A1  | 0.653316829  | 2.3576173   | 4.890492428  | 2.93E-06 | 5.87E-05 | 4.196759642 |
| VSIG4   | 1.730799007  | 3.359857215 | 4.887962076  | 2.97E-06 | 5.93E-05 | 4.186435619 |
| KCNJ15  | 0.592937402  | 0.467367111 | 4.884280656  | 3.01E-06 | 6.01E-05 | 4.171421666 |
| ZNF10   | -0.615195008 | 2.960462244 | -4.881780596 | 3.05E-06 | 6.07E-05 | 4.161230061 |
| IRF8    | 1.663105037  | 5.103193362 | 4.878104667  | 3.09E-06 | 6.16E-05 | 4.14625144  |
| RASA3   | 0.681171688  | 5.278218858 | 4.875008766  | 3.14E-06 | 6.23E-05 | 4.133642291 |
| GPR137B | 0.81030742   | 3.149216545 | 4.87250154   | 3.17E-06 | 6.27E-05 | 4.123434736 |
| IQSEC2  | 0.983905124  | 2.861766531 | 4.871510137  | 3.18E-06 | 6.29E-05 | 4.119399473 |

|         |              |             |              |          |          |             |
|---------|--------------|-------------|--------------|----------|----------|-------------|
| BMF     | 0.710542076  | 4.491564154 | 4.869979376  | 3.20E-06 | 6.32E-05 | 4.113169988 |
| ANXA2   | 1.383885907  | 5.247050435 | 4.867788667  | 3.23E-06 | 6.37E-05 | 4.104257152 |
| ZC2HC1A | 0.867446235  | 1.270022491 | 4.86445546   | 3.28E-06 | 6.45E-05 | 4.090701358 |
| KCTD7   | 0.794065163  | 1.999590188 | 4.864221806  | 3.28E-06 | 6.45E-05 | 4.089751351 |
| RASSF4  | 1.290045155  | 4.12388081  | 4.860741139  | 3.33E-06 | 6.53E-05 | 4.075603105 |
| MCUB    | 0.617661523  | 4.191990363 | 4.85978897   | 3.35E-06 | 6.54E-05 | 4.071733929 |
| PLA2G4C | 0.723187669  | 0.996607746 | 4.857122621  | 3.38E-06 | 6.60E-05 | 4.060901877 |
| TXNIP   | 0.706121476  | 9.105441595 | 4.856807838  | 3.39E-06 | 6.60E-05 | 4.059623338 |
| PLCB2   | 0.879640063  | 7.018468536 | 4.856458269  | 3.39E-06 | 6.60E-05 | 4.058203576 |
| AGPAT3  | 0.808737011  | 4.471736908 | 4.854954959  | 3.42E-06 | 6.64E-05 | 4.052098744 |
| TBX21   | 0.899042839  | 2.167369119 | 4.854666722  | 3.42E-06 | 6.64E-05 | 4.050928384 |
| DOCK9   | 0.812965154  | 1.427134182 | 4.849956568  | 3.49E-06 | 6.75E-05 | 4.03180996  |
| CAST    | 0.88170048   | 4.950903746 | 4.848851898  | 3.51E-06 | 6.77E-05 | 4.027327967 |
| FLNA    | 0.769207146  | 8.61089773  | 4.84858013   | 3.51E-06 | 6.78E-05 | 4.026225427 |
| PLN     | 0.666270349  | 1.204614557 | 4.843237144  | 3.59E-06 | 6.92E-05 | 4.004557995 |
| CD8A    | 0.953390705  | 2.931047869 | 4.837070658  | 3.69E-06 | 7.07E-05 | 3.97957142  |
| AATK    | 0.852683272  | 2.285864482 | 4.834832686  | 3.72E-06 | 7.13E-05 | 3.97050858  |
| DAPP1   | 0.873994546  | 4.797974564 | 4.825584652  | 3.87E-06 | 7.38E-05 | 3.933088562 |
| SKA3    | -0.712648508 | 4.090725407 | -4.824140693 | 3.89E-06 | 7.42E-05 | 3.927250371 |
| GRN     | 1.166910921  | 8.333753343 | 4.823522297  | 3.90E-06 | 7.43E-05 | 3.924750452 |
| SRGAP2  | 0.748740347  | 3.871591001 | 4.818246731  | 3.99E-06 | 7.57E-05 | 3.903432492 |
| HK1     | 0.76960359   | 5.685478198 | 4.814331664  | 4.06E-06 | 7.68E-05 | 3.887622554 |
| IL13RA1 | 1.345122575  | 4.875219807 | 4.814070125  | 4.06E-06 | 7.68E-05 | 3.886566714 |
| SGMS1   | 0.655316022  | 3.413588929 | 4.807552262  | 4.18E-06 | 7.87E-05 | 3.860266754 |
| CORO1C  | 0.587402285  | 5.828314827 | 4.802239347  | 4.27E-06 | 8.02E-05 | 3.838847044 |
| GRK3    | 0.695222745  | 4.961485295 | 4.798911625  | 4.33E-06 | 8.11E-05 | 3.825439237 |
| RASSF2  | 0.69773809   | 6.725843193 | 4.796596781  | 4.38E-06 | 8.17E-05 | 3.816116234 |
| ZNF107  | -0.820601543 | 4.725086367 | -4.793771558 | 4.43E-06 | 8.26E-05 | 3.804741904 |
| SLC18B1 | 0.91426343   | 2.622138592 | 4.791044625  | 4.48E-06 | 8.33E-05 | 3.793767689 |
| MTMR11  | 1.491784478  | 2.109279975 | 4.789551926  | 4.51E-06 | 8.36E-05 | 3.787762333 |
| BRIP1   | -0.679927459 | 3.548997026 | -4.789451086 | 4.51E-06 | 8.36E-05 | 3.787356687 |
| FLVCR2  | 0.825742473  | 2.515657    | 4.787609996  | 4.55E-06 | 8.40E-05 | 3.779951593 |
| SKAP1   | 0.980226649  | 3.108107698 | 4.786972053  | 4.56E-06 | 8.41E-05 | 3.777386167 |
| FOSL2   | 0.828992855  | 6.887586668 | 4.777204595  | 4.75E-06 | 8.71E-05 | 3.73813689  |
| CD28    | 0.875180352  | 2.137424488 | 4.776635259  | 4.76E-06 | 8.73E-05 | 3.7358508   |
| CD6     | 0.959975155  | 3.031255374 | 4.775710982  | 4.78E-06 | 8.74E-05 | 3.732139902 |
| SBF2    | 0.739560177  | 3.306455983 | 4.775243086  | 4.79E-06 | 8.74E-05 | 3.730261525 |
| IL6ST   | 0.915252245  | 4.461585045 | 4.774891927  | 4.80E-06 | 8.74E-05 | 3.728851878 |
| SCPEP1  | 1.421041133  | 5.313692399 | 4.774845091  | 4.80E-06 | 8.74E-05 | 3.728663867 |
| GNS     | 0.790403865  | 6.338024125 | 4.774833233  | 4.80E-06 | 8.74E-05 | 3.72861627  |
| TNFAIP3 | 0.814012185  | 5.355255476 | 4.769840531  | 4.90E-06 | 8.92E-05 | 3.708582138 |
| DMWD    | 0.788218702  | 2.063897884 | 4.768169801  | 4.94E-06 | 8.97E-05 | 3.701881282 |
| CCDC169 | -0.660677919 | 1.444418423 | -4.755756711 | 5.20E-06 | 9.40E-05 | 3.652146794 |
| SLC2A3  | 1.009575685  | 5.846480206 | 4.751513655  | 5.29E-06 | 9.55E-05 | 3.635167201 |
| ENOSF1  | -0.639161804 | 4.866787948 | -4.750749004 | 5.31E-06 | 9.56E-05 | 3.632108393 |
| KLHL23  | -0.867015074 | 3.347207636 | -4.748344838 | 5.37E-06 | 9.64E-05 | 3.62249332  |
| CBR1    | 0.84522348   | 3.772782139 | 4.74573997   | 5.42E-06 | 9.70E-05 | 3.612079402 |

|         |              |             |              |          |             |             |
|---------|--------------|-------------|--------------|----------|-------------|-------------|
| CENPJ   | -0.643999324 | 4.946063771 | -4.739967803 | 5.56E-06 | 9.93E-05    | 3.589017246 |
| GIMAP6  | 1.058613257  | 4.684548374 | 4.73742958   | 5.62E-06 | 0.0001001   | 3.578882218 |
| STOX1   | -0.611152974 | 1.301347057 | -4.729799354 | 5.80E-06 | 0.000102987 | 3.548437851 |
| GRK5    | 0.731497229  | 2.131961609 | 4.729786204  | 5.80E-06 | 0.000102987 | 3.548385413 |
| DUSP1   | 0.959169314  | 9.045362733 | 4.724981597  | 5.92E-06 | 0.000104893 | 3.529232824 |
| MS4A4E  | 1.674807898  | 4.989269457 | 4.724253344  | 5.94E-06 | 0.000105118 | 3.52633098  |
| EHD4    | 0.850511622  | 3.221929073 | 4.722706181  | 5.98E-06 | 0.000105706 | 3.520167093 |
| AIM2    | 0.929605556  | 2.083669993 | 4.718717116  | 6.08E-06 | 0.00010739  | 3.504281208 |
| ZSCAN31 | -0.667532506 | 2.681562919 | -4.71839395  | 6.08E-06 | 0.000107438 | 3.502994659 |
| PRDM1   | 0.691902152  | 2.877429293 | 4.716914699  | 6.12E-06 | 0.000108008 | 3.497106423 |
| HEG1    | 0.897645359  | 2.228791378 | 4.715985136  | 6.15E-06 | 0.000108331 | 3.493406913 |
| CXCR1   | 0.841029639  | 1.216516608 | 4.713950599  | 6.20E-06 | 0.000109159 | 3.485311567 |
| FAIM    | -0.611234446 | 3.449484657 | -4.710964177 | 6.28E-06 | 0.000110035 | 3.473433138 |
| FCRL3   | 0.85027205   | 2.253015056 | 4.700713429  | 6.55E-06 | 0.000114238 | 3.432701203 |
| BAG3    | 1.037415104  | 1.951949149 | 4.699481743  | 6.59E-06 | 0.000114568 | 3.427811223 |
| STK26   | -0.601811559 | 6.802646228 | -4.69937997  | 6.59E-06 | 0.000114568 | 3.42740721  |
| VOPP1   | 0.696327615  | 3.248072356 | 4.694631793  | 6.72E-06 | 0.000116655 | 3.408564932 |
| ACSL1   | 1.075658071  | 5.533806126 | 4.692966342  | 6.77E-06 | 0.000117052 | 3.401959065 |
| TRIB1   | 1.07448602   | 5.715973837 | 4.692485704  | 6.78E-06 | 0.000117182 | 3.400052965 |
| ZSWIM6  | 0.626765333  | 4.711825204 | 4.672433161  | 7.37E-06 | 0.000126437 | 3.320651623 |
| FCGBP   | 0.75023488   | 0.85413957  | 4.67234527   | 7.37E-06 | 0.000126437 | 3.320304133 |
| RAB31   | 1.485886173  | 4.434589745 | 4.669235488  | 7.47E-06 | 0.000127737 | 3.308012073 |
| DGAT2   | 0.766002636  | 1.544983241 | 4.669042921  | 7.48E-06 | 0.000127737 | 3.307251106 |
| HACD1   | -0.774193427 | 3.732086916 | -4.668574771 | 7.49E-06 | 0.000127874 | 3.305401199 |
| ACP5    | 0.79972996   | 2.946741112 | 4.667802726  | 7.52E-06 | 0.000128173 | 3.30235073  |
| TMEM88  | 0.606637299  | 3.01602788  | 4.661169383  | 7.73E-06 | 0.000131299 | 3.276156063 |
| SDC3    | 1.036443179  | 1.507383271 | 4.659949892  | 7.76E-06 | 0.000131805 | 3.271343233 |
| RNF144B | 1.075781732  | 3.712354852 | 4.65982396   | 7.77E-06 | 0.000131805 | 3.27084628  |
| CERCAM  | -1.066310629 | 3.69281394  | -4.658437084 | 7.81E-06 | 0.000132336 | 3.265374034 |
| ZBTB10  | -0.591360105 | 3.65811377  | -4.652160763 | 8.02E-06 | 0.000135243 | 3.240623739 |
| STX3    | 0.691212378  | 4.525083153 | 4.651451486  | 8.04E-06 | 0.000135525 | 3.237828233 |
| TLR6    | 0.981072149  | 3.723108823 | 4.649670493  | 8.10E-06 | 0.000136201 | 3.230810055 |
| BRCA1   | -0.658329427 | 4.534236304 | -4.649628338 | 8.10E-06 | 0.000136201 | 3.230643961 |
| CEBPD   | 1.267837891  | 5.724702761 | 4.649335748  | 8.11E-06 | 0.000136248 | 3.22949117  |
| TMEM44  | -0.617439569 | 3.976651619 | -4.648284015 | 8.15E-06 | 0.000136727 | 3.225347815 |
| PUDP    | 0.631849721  | 3.557066386 | 4.642911655  | 8.33E-06 | 0.000139302 | 3.204193498 |
| JAK2    | 0.649863691  | 5.527801712 | 4.642749494  | 8.34E-06 | 0.000139302 | 3.203555239 |
| HERPUD1 | 0.647263243  | 5.507596729 | 4.642293259  | 8.36E-06 | 0.000139446 | 3.201759602 |
| PLA2G7  | 0.899454453  | 1.0873972   | 4.640645452  | 8.41E-06 | 0.000140247 | 3.19527525  |
| CCR4    | 0.746406754  | 1.590933421 | 4.639072727  | 8.47E-06 | 0.000140947 | 3.189087875 |
| PDE2A   | 0.600357379  | 0.882376113 | 4.638885109  | 8.47E-06 | 0.000140947 | 3.188349852 |
| LYZ     | 2.062336639  | 10.98525357 | 4.634632535  | 8.62E-06 | 0.00014333  | 3.171627417 |
| ADAM9   | 0.929385975  | 3.621388102 | 4.632140511  | 8.71E-06 | 0.000144447 | 3.161833067 |
| PLEKHO1 | 0.607802344  | 5.213325156 | 4.628709741  | 8.84E-06 | 0.000146264 | 3.148355299 |
| PLK3    | 0.651664649  | 4.683337314 | 4.624304381  | 9.00E-06 | 0.000148198 | 3.131059264 |
| PAOX    | 0.736914925  | 2.191585624 | 4.621636568  | 9.10E-06 | 0.000149589 | 3.120590759 |
| CD53    | 0.591221063  | 8.671482078 | 4.613629779  | 9.41E-06 | 0.000153713 | 3.089197906 |

|          |              |             |              |          |             |             |
|----------|--------------|-------------|--------------|----------|-------------|-------------|
| CPEB4    | 0.595513513  | 4.09860651  | 4.610678766  | 9.52E-06 | 0.000155337 | 3.077637406 |
| SLC49A3  | 0.873909412  | 2.871521809 | 4.609466903  | 9.57E-06 | 0.000155985 | 3.072891498 |
| MIDN     | 0.637821209  | 6.173029957 | 4.607523191  | 9.65E-06 | 0.000157052 | 3.065281372 |
| IL7R     | 1.03451935   | 4.197528013 | 4.604619359  | 9.76E-06 | 0.000158606 | 3.053916389 |
| PLXNA1   | 0.831406907  | 2.048759132 | 4.603946302  | 9.79E-06 | 0.000158781 | 3.051282918 |
| CDC42EP1 | 1.156193438  | 1.759294306 | 4.601365843  | 9.90E-06 | 0.000160347 | 3.041188888 |
| RMDN2    | 0.6591303    | 1.396508695 | 4.598100672  | 1.00E-05 | 0.000162208 | 3.028422242 |
| CCDC34   | -0.617117521 | 2.860450789 | -4.597960305 | 1.00E-05 | 0.000162208 | 3.02787356  |
| PRKCD    | 0.877652188  | 6.83528728  | 4.596425078  | 1.01E-05 | 0.000162945 | 3.021873272 |
| SPIN4    | -0.80002107  | 4.922614286 | -4.59625672  | 1.01E-05 | 0.000162945 | 3.021215345 |
| TRNP1    | 0.638725202  | 0.721559076 | 4.595587355  | 1.01E-05 | 0.00016326  | 3.018599713 |
| CENPV    | -0.587715243 | 4.32840902  | -4.594985821 | 1.02E-05 | 0.000163394 | 3.016249369 |
| JPH4     | 0.653183862  | 1.408421505 | 4.586618304  | 1.05E-05 | 0.000168426 | 2.983578187 |
| CD300LF  | 0.94936451   | 5.758063142 | 4.583944665  | 1.06E-05 | 0.000170009 | 2.973147865 |
| LILRB5   | 0.612863844  | 0.613079755 | 4.583088273  | 1.07E-05 | 0.000170404 | 2.969807854 |
| TTYH3    | 0.790150837  | 5.7893808   | 4.580309062  | 1.08E-05 | 0.000172004 | 2.958971735 |
| ACSM3    | -1.297613058 | 4.376431386 | -4.579636604 | 1.08E-05 | 0.000172198 | 2.956350537 |
| VSIG2    | 1.142457905  | 2.999690491 | 4.578538135  | 1.09E-05 | 0.000172629 | 2.952069363 |
| OAS3     | 0.997503379  | 4.367115161 | 4.578246489  | 1.09E-05 | 0.000172629 | 2.950932823 |
| ZYX      | 0.657912164  | 8.346953231 | 4.578234101  | 1.09E-05 | 0.000172629 | 2.950884548 |
| NBEAL2   | 0.753497355  | 7.116461518 | 4.570289645  | 1.12E-05 | 0.000177384 | 2.919945186 |
| EOMES    | 0.742695791  | 1.868455784 | 4.570234622  | 1.12E-05 | 0.000177384 | 2.919731036 |
| JDP2     | 0.756179461  | 3.637464856 | 4.568458354  | 1.13E-05 | 0.000178537 | 2.912818758 |
| TRABD2A  | 0.682181675  | 1.731147122 | 4.566118578  | 1.14E-05 | 0.000180114 | 2.903716548 |
| AGPAT5   | -0.646075851 | 5.346520497 | -4.562801721 | 1.16E-05 | 0.000182286 | 2.89081902  |
| VWCE     | -0.904214502 | 2.724728412 | -4.561761225 | 1.16E-05 | 0.000182828 | 2.886774459 |
| TIMP1    | 0.994717768  | 7.216851635 | 4.561684294  | 1.16E-05 | 0.000182828 | 2.886475444 |
| CD3G     | 0.879188398  | 2.593186574 | 4.56146424   | 1.17E-05 | 0.000182846 | 2.885620157 |
| BACH2    | 0.832846502  | 2.173591671 | 4.558787955  | 1.18E-05 | 0.000184417 | 2.875220572 |
| KIAA0040 | 0.646354908  | 4.660755946 | 4.55847597   | 1.18E-05 | 0.000184505 | 2.874008536 |
| FRAT2    | 0.598163406  | 5.237327918 | 4.55733447   | 1.19E-05 | 0.000184805 | 2.869574412 |
| PDZD4    | 0.692392571  | 1.396856331 | 4.556335238  | 1.19E-05 | 0.00018509  | 2.865693577 |
| REXO5    | -0.628532478 | 4.307199943 | -4.554364154 | 1.20E-05 | 0.000186175 | 2.858040043 |
| MYO1G    | 0.728327848  | 6.308411448 | 4.547635473  | 1.23E-05 | 0.000190736 | 2.831931123 |
| ZNF831   | 0.62896947   | 1.468303994 | 4.543500931  | 1.26E-05 | 0.000193375 | 2.815901862 |
| SLC35F6  | 0.599810879  | 4.484837117 | 4.541923977  | 1.26E-05 | 0.000193872 | 2.809790909 |
| GOLGA8R  | -0.686036984 | 2.416945118 | -4.541766809 | 1.26E-05 | 0.000193872 | 2.809181942 |
| PLD3     | 0.814221726  | 6.092690116 | 4.541594287  | 1.26E-05 | 0.000193872 | 2.808513499 |
| FAM50A   | 0.620739161  | 4.713518854 | 4.541522362  | 1.27E-05 | 0.000193872 | 2.808234831 |
| SIRPA    | 0.834436139  | 5.722664984 | 4.541129655  | 1.27E-05 | 0.00019403  | 2.806713359 |
| RELL2    | 0.829498843  | 2.331983565 | 4.540048963  | 1.27E-05 | 0.000194736 | 2.802526913 |
| LCP1     | 0.69411603   | 9.478132629 | 4.538235346  | 1.28E-05 | 0.000195714 | 2.795502828 |
| LMNA     | 1.358058273  | 4.744709858 | 4.538069802  | 1.28E-05 | 0.000195714 | 2.794861782 |
| TLR4     | 1.333291401  | 4.863340009 | 4.53805572   | 1.28E-05 | 0.000195714 | 2.79480725  |
| HLA-DMA  | 1.10942667   | 6.903804456 | 4.537189393  | 1.29E-05 | 0.000196254 | 2.791452802 |
| THEMIS   | 0.822025004  | 1.927451001 | 4.535674657  | 1.30E-05 | 0.000197318 | 2.785588796 |
| SLC30A1  | 0.605774544  | 4.008707634 | 4.531286498  | 1.32E-05 | 0.000200259 | 2.768608858 |

|          |              |             |              |          |             |             |
|----------|--------------|-------------|--------------|----------|-------------|-------------|
| C1QB     | 1.75640665   | 2.760989761 | 4.530716588  | 1.32E-05 | 0.000200471 | 2.766404465 |
| CD52     | 1.395532077  | 7.030646135 | 4.525841889  | 1.35E-05 | 0.000203963 | 2.747557465 |
| MNDA     | 1.495478153  | 7.196184452 | 4.518839773  | 1.39E-05 | 0.000209383 | 2.720510863 |
| ADAM22   | -0.69008201  | 1.600604217 | -4.515156439 | 1.41E-05 | 0.00021222  | 2.706295635 |
| SYNE2    | 0.843299123  | 2.098377199 | 4.5112379    | 1.43E-05 | 0.0002153   | 2.691181864 |
| CHST10   | -0.59966693  | 3.239815041 | -4.511029852 | 1.43E-05 | 0.000215316 | 2.69037969  |
| SLC31A2  | 0.699506887  | 2.554655528 | 4.509734668  | 1.44E-05 | 0.000216287 | 2.685386429 |
| ZCCHC24  | 0.810590453  | 2.596728912 | 4.509292546  | 1.44E-05 | 0.00021651  | 2.683682174 |
| PLK4     | -0.587808452 | 4.203948232 | -4.50538184  | 1.47E-05 | 0.000219475 | 2.668612772 |
| ACSS2    | 0.620157452  | 4.736895704 | 4.501490185  | 1.49E-05 | 0.000222349 | 2.653626176 |
| PTPN18   | 0.599741593  | 6.231498401 | 4.501426268  | 1.49E-05 | 0.000222349 | 2.65338011  |
| PECR     | 0.79694493   | 1.414107153 | 4.496848536  | 1.52E-05 | 0.000225659 | 2.63576364  |
| RASL11A  | 0.697042983  | 1.794539179 | 4.495099412  | 1.53E-05 | 0.000227095 | 2.629035922 |
| TMEM176A | 1.403878725  | 2.231555427 | 4.493964322  | 1.54E-05 | 0.00022797  | 2.624670997 |
| TMEM67   | -0.650126841 | 2.174968661 | -4.492431054 | 1.55E-05 | 0.000229044 | 2.618776173 |
| DUSP7    | 0.61759357   | 4.348996297 | 4.488596226  | 1.57E-05 | 0.000232284 | 2.604039116 |
| RBM38    | 0.870219434  | 5.400029529 | 4.481825123  | 1.61E-05 | 0.000238207 | 2.578040395 |
| FBP1     | 1.492232231  | 3.899805908 | 4.479460729  | 1.63E-05 | 0.000240319 | 2.568968638 |
| TFDP2    | -0.701531951 | 5.575139698 | -4.474712261 | 1.66E-05 | 0.000244801 | 2.550760127 |
| SLC49A4  | 0.6080232    | 3.72477268  | 4.474024715  | 1.67E-05 | 0.000245297 | 2.548124817 |
| AOAH     | 1.175236763  | 6.124721998 | 4.473233627  | 1.67E-05 | 0.000245553 | 2.545093008 |
| CD1B     | 0.640360543  | 0.41282489  | 4.471871611  | 1.68E-05 | 0.000246512 | 2.539874055 |
| SIPA1L1  | 0.693528591  | 3.722346741 | 4.467539541  | 1.71E-05 | 0.000250216 | 2.523282174 |
| LY86     | 1.678924768  | 5.038448468 | 4.466958335  | 1.71E-05 | 0.00025048  | 2.521057038 |
| HLA-DRA  | 1.441722145  | 10.15012988 | 4.466810013  | 1.71E-05 | 0.00025048  | 2.520489222 |
| EVI2B    | 0.702903779  | 8.239165693 | 4.466100985  | 1.72E-05 | 0.000250911 | 2.517775071 |
| RBP7     | 0.908797875  | 1.493807902 | 4.464789885  | 1.73E-05 | 0.000251778 | 2.512757025 |
| HLA-DPA1 | 1.497247241  | 6.408863457 | 4.463523092  | 1.74E-05 | 0.000252882 | 2.507909574 |
| HMGB3    | -0.671271534 | 3.979637203 | -4.463062774 | 1.74E-05 | 0.000253164 | 2.506148391 |
| ZNF385C  | -0.967564454 | 2.269813488 | -4.456238658 | 1.79E-05 | 0.00025908  | 2.480054745 |
| TEX30    | -0.616781019 | 4.471910262 | -4.453905655 | 1.81E-05 | 0.000261144 | 2.47114062  |
| DIXDC1   | -0.629214171 | 1.686764247 | -4.453615375 | 1.81E-05 | 0.000261256 | 2.470031732 |
| SLC26A6  | 0.675236971  | 3.885408723 | 4.452001566  | 1.82E-05 | 0.000262573 | 2.463867845 |
| S1PR1    | 0.888013664  | 3.258569335 | 4.447464482  | 1.85E-05 | 0.000266831 | 2.446547339 |
| SLC22A16 | -0.66082542  | 4.65636483  | -4.439506041 | 1.91E-05 | 0.000273708 | 2.416196799 |
| SORT1    | 1.591754699  | 3.576674497 | 4.43761781   | 1.93E-05 | 0.000275393 | 2.40900161  |
| TCTEX1D4 | 0.697494845  | 2.674982716 | 4.437369219  | 1.93E-05 | 0.00027542  | 2.40805451  |
| HLA-DRB5 | 1.587720154  | 6.977939748 | 4.435955672  | 1.94E-05 | 0.000276634 | 2.402669812 |
| IL17RA   | 1.063943217  | 6.196942285 | 4.433964939  | 1.96E-05 | 0.000278656 | 2.395088537 |
| DPY19L2  | -1.254474943 | 3.546105084 | -4.433168591 | 1.96E-05 | 0.000279346 | 2.392056513 |
| FAM20A   | 0.610175264  | 1.408481832 | 4.430805609  | 1.98E-05 | 0.000281193 | 2.38306202  |
| ANKRD33B | -0.908393771 | 3.003574041 | -4.424983026 | 2.03E-05 | 0.000287437 | 2.360913812 |
| GZMK     | 0.884113461  | 2.677336443 | 4.424716078  | 2.03E-05 | 0.000287536 | 2.359898893 |
| TMEM150B | 1.189243291  | 3.217428568 | 4.415087014  | 2.11E-05 | 0.000297363 | 2.323319831 |
| MS4A1    | 0.896582749  | 3.451825021 | 4.413568174  | 2.12E-05 | 0.000298346 | 2.317555368 |
| MPP7     | 0.966455809  | 3.002767384 | 4.413544528  | 2.12E-05 | 0.000298346 | 2.317465634 |
| TARBP1   | -0.607417603 | 6.217062419 | -4.413027286 | 2.13E-05 | 0.000298646 | 2.315502882 |

|          |              |             |              |          |             |             |
|----------|--------------|-------------|--------------|----------|-------------|-------------|
| CARD17   | 0.821423168  | 1.189353626 | 4.412772545  | 2.13E-05 | 0.000298646 | 2.314536292 |
| AHNAK    | 0.88675463   | 7.843533598 | 4.409290624  | 2.16E-05 | 0.00030239  | 2.301328566 |
| FNIP2    | 0.668426988  | 3.228650157 | 4.394448402  | 2.29E-05 | 0.000318399 | 2.24511448  |
| NDC80    | -0.641103216 | 3.76062473  | -4.393892809 | 2.30E-05 | 0.000318672 | 2.243012909 |
| LDLR     | 0.927972654  | 4.004546918 | 4.39293758   | 2.31E-05 | 0.000319646 | 2.239400135 |
| FCER2    | 1.243832958  | 3.23790388  | 4.391823295  | 2.32E-05 | 0.000320846 | 2.235186529 |
| ANKRD55  | 0.599119981  | 1.17148588  | 4.391433886  | 2.32E-05 | 0.000321118 | 2.233714189 |
| CLIP4    | 1.025454861  | 3.102890036 | 4.391202583  | 2.32E-05 | 0.000321186 | 2.232839685 |
| ZNF439   | -0.735625216 | 4.635037369 | -4.390119192 | 2.33E-05 | 0.000322082 | 2.22874408  |
| MICAL1   | 0.834530503  | 6.061981847 | 4.389973939  | 2.34E-05 | 0.000322082 | 2.228195029 |
| GPR162   | 0.985059967  | 3.580561944 | 4.38696448   | 2.36E-05 | 0.00032483  | 2.216822385 |
| KIF15    | -0.701228226 | 3.758385531 | -4.383318181 | 2.40E-05 | 0.000329238 | 2.203050832 |
| NHSL2    | 1.207162612  | 3.70204852  | 4.383238574  | 2.40E-05 | 0.000329238 | 2.202750262 |
| NUDT16   | 0.697893458  | 4.155256848 | 4.380349276  | 2.43E-05 | 0.000332123 | 2.191843929 |
| ARL4C    | 0.826283765  | 4.152206861 | 4.377762367  | 2.45E-05 | 0.000335122 | 2.182083532 |
| PNPLA6   | 0.634426814  | 5.187376501 | 4.374083251  | 2.49E-05 | 0.000337921 | 2.168209558 |
| ALOX5AP  | 1.298699855  | 5.747483354 | 4.37202957   | 2.51E-05 | 0.000340154 | 2.160468852 |
| FAM20C   | 1.11213718   | 2.611780418 | 4.369519293  | 2.53E-05 | 0.00034317  | 2.151010792 |
| KYNU     | 1.018758331  | 2.184306621 | 4.368438525  | 2.55E-05 | 0.000344261 | 2.146939981 |
| LTK      | -1.388642453 | 3.495519566 | -4.368374574 | 2.55E-05 | 0.000344261 | 2.146699128 |
| DTL      | -0.646076504 | 4.660682518 | -4.36634875  | 2.57E-05 | 0.00034633  | 2.139070756 |
| SASH1    | 0.758321969  | 0.656065402 | 4.362492801  | 2.61E-05 | 0.000351204 | 2.124558149 |
| GPR84    | 0.823735176  | 1.736992922 | 4.355207127  | 2.68E-05 | 0.000359267 | 2.097162969 |
| ADAM8    | 1.103938605  | 5.263469026 | 4.355056957  | 2.68E-05 | 0.000359267 | 2.096598664 |
| KIAA1549 | -0.869821104 | 2.775702783 | -4.352055998 | 2.72E-05 | 0.000362832 | 2.085324756 |
| MAP3K6   | 0.816747864  | 3.358507655 | 4.347704896  | 2.76E-05 | 0.000368361 | 2.068988887 |
| HTATIP2  | 0.815585887  | 3.857149017 | 4.345839974  | 2.78E-05 | 0.000370382 | 2.061990885 |
| CD74     | 1.212072908  | 10.44922754 | 4.343976175  | 2.81E-05 | 0.000372117 | 2.05499932  |
| NAAA     | 0.640834831  | 4.83813799  | 4.342067589  | 2.83E-05 | 0.000374183 | 2.047842048 |
| PAPSS2   | 0.725460807  | 2.609208898 | 4.338831259  | 2.86E-05 | 0.000378763 | 2.03571101  |
| SOCS3    | 1.165619209  | 5.304589533 | 4.337379145  | 2.88E-05 | 0.000380693 | 2.030270094 |
| DPEP2    | 0.646434067  | 5.382775216 | 4.332370976  | 2.94E-05 | 0.000387804 | 2.011515376 |
| ZNF253   | -0.629174136 | 4.032726467 | -4.329412538 | 2.97E-05 | 0.000392112 | 2.000444092 |
| UBTD1    | 0.777070951  | 3.256853734 | 4.3244635    | 3.03E-05 | 0.000397986 | 1.98193599  |
| ANO9     | 0.792716099  | 2.510521313 | 4.320744213  | 3.08E-05 | 0.000403073 | 1.968037178 |
| FGFBP2   | 0.994297621  | 2.863592004 | 4.319867686  | 3.09E-05 | 0.000404202 | 1.964762928 |
| ZNF532   | 0.990966685  | 1.594009767 | 4.319189495  | 3.09E-05 | 0.000405015 | 1.962229899 |
| POGLUT3  | -0.612180561 | 4.357711516 | -4.310412185 | 3.20E-05 | 0.000417315 | 1.929473487 |
| THBD     | 0.847012475  | 2.282469083 | 4.310392472  | 3.20E-05 | 0.000417315 | 1.929399972 |
| DDX60L   | 0.659640223  | 4.717952687 | 4.30948254   | 3.22E-05 | 0.000417683 | 1.926007006 |
| PLCL2    | 0.695133073  | 4.307011269 | 4.307616509  | 3.24E-05 | 0.0004203   | 1.919050594 |
| STXBP2   | 0.598980496  | 5.418660382 | 4.301264878  | 3.32E-05 | 0.000429539 | 1.895389033 |
| FAM151A  | -0.604661584 | 2.18611863  | -4.289598186 | 3.48E-05 | 0.000444734 | 1.851995214 |
| CD2      | 0.953448641  | 4.226900591 | 4.289281517  | 3.48E-05 | 0.000444996 | 1.850818603 |
| KANK1    | -0.693319062 | 3.316257048 | -4.288829281 | 3.49E-05 | 0.000445409 | 1.849138389 |
| CYBA     | 0.593012711  | 7.595451565 | 4.285563603  | 3.53E-05 | 0.000449786 | 1.837009194 |
| MFSD2A   | 0.854924752  | 2.56398814  | 4.283656596  | 3.56E-05 | 0.000452583 | 1.829929492 |

|          |              |             |              |          |             |             |
|----------|--------------|-------------|--------------|----------|-------------|-------------|
| FCGR3B   | 1.125782152  | 1.333719768 | 4.282932561  | 3.57E-05 | 0.00045331  | 1.827242148 |
| SMAD3    | 0.620625688  | 4.573473138 | 4.282916945  | 3.57E-05 | 0.00045331  | 1.827184192 |
| PITPNM1  | 0.652617707  | 5.212950169 | 4.281851721  | 3.59E-05 | 0.00045462  | 1.823231116 |
| B4GALT2  | -0.7187942   | 3.488732806 | -4.276453848 | 3.66E-05 | 0.000463166 | 1.803210745 |
| CRYBG1   | 0.710656535  | 5.507423869 | 4.274477265  | 3.69E-05 | 0.000466475 | 1.795884442 |
| SKIL     | 0.671889744  | 2.986767813 | 4.274029507  | 3.70E-05 | 0.000466993 | 1.794225159 |
| WT1      | -1.107670208 | 3.087281923 | -4.271466664 | 3.74E-05 | 0.000471107 | 1.784730372 |
| GOLGA8Q  | -0.631669248 | 1.547847181 | -4.261836049 | 3.88E-05 | 0.000486416 | 1.749089099 |
| KRT23    | 0.70145239   | 0.586116104 | 4.25995452   | 3.91E-05 | 0.000489703 | 1.742132914 |
| GOLGA80  | -0.73834091  | 2.147618627 | -4.259564618 | 3.91E-05 | 0.000490136 | 1.740691697 |
| ANKRD36C | -0.624190546 | 4.523739324 | -4.256875774 | 3.96E-05 | 0.000494375 | 1.730755469 |
| GZMM     | 0.740497354  | 2.590080326 | 4.256644431  | 3.96E-05 | 0.000494505 | 1.729900796 |
| IFITM3   | 1.53294713   | 5.681019218 | 4.253757832  | 4.00E-05 | 0.000499168 | 1.719239465 |
| PLAGL1   | -0.628465634 | 5.676442381 | -4.253256767 | 4.01E-05 | 0.000499828 | 1.717389389 |
| SAMD3    | 0.661976787  | 1.553667006 | 4.251656114  | 4.04E-05 | 0.000502649 | 1.711480415 |
| CD8B     | 0.733588074  | 2.054062153 | 4.245828513  | 4.13E-05 | 0.00051326  | 1.689981327 |
| CYTL1    | -1.710294702 | 6.140596357 | -4.24304487  | 4.18E-05 | 0.000518216 | 1.679719768 |
| OLR1     | 0.884105073  | 1.181428371 | 4.239658316  | 4.23E-05 | 0.000523453 | 1.66724247  |
| MCOLN2   | 0.804201154  | 1.520148551 | 4.236518247  | 4.28E-05 | 0.000528906 | 1.65568     |
| VNN1     | 1.781495458  | 3.874046957 | 4.235155912  | 4.31E-05 | 0.00053139  | 1.650665563 |
| NAIP     | 0.928347248  | 2.530954584 | 4.233915142  | 4.33E-05 | 0.000533633 | 1.646099636 |
| SETBP1   | 1.144774431  | 1.906421851 | 4.229823959  | 4.40E-05 | 0.00054051  | 1.631051562 |
| ZNF70    | -0.603727385 | 4.464593005 | -4.22241611  | 4.53E-05 | 0.0005546   | 1.60383208  |
| GNLY     | 1.175750098  | 3.891210421 | 4.221668996  | 4.54E-05 | 0.000555867 | 1.601088869 |
| SCGB1A1  | 0.596653433  | 0.779970444 | 4.221233012  | 4.55E-05 | 0.000556462 | 1.599488218 |
| FRAT1    | 0.617257654  | 4.289900507 | 4.213654057  | 4.68E-05 | 0.000570262 | 1.571683088 |
| SFXN3    | 0.809405335  | 5.274079278 | 4.206600519  | 4.81E-05 | 0.000582442 | 1.545839425 |
| IFI6     | 0.928583818  | 5.908765922 | 4.196588128  | 5.00E-05 | 0.000602582 | 1.509210869 |
| SMIM14   | 0.767290316  | 3.394846774 | 4.195445497  | 5.03E-05 | 0.000604886 | 1.50503495  |
| XRCC2    | -0.596001743 | 3.832626056 | -4.194583996 | 5.04E-05 | 0.000606536 | 1.501887029 |
| LEF1     | 0.958146749  | 2.991800903 | 4.191458741  | 5.10E-05 | 0.000612043 | 1.490471467 |
| CD22     | 0.879894606  | 2.867270207 | 4.188004767  | 5.17E-05 | 0.000619912 | 1.477862688 |
| CDC25A   | -0.590498429 | 3.621643567 | -4.185516867 | 5.22E-05 | 0.000624764 | 1.468785451 |
| GSAP     | 0.683189789  | 3.924007113 | 4.181388318  | 5.31E-05 | 0.000634055 | 1.453731218 |
| HLA-DPB1 | 1.306579291  | 7.030764599 | 4.17325068   | 5.48E-05 | 0.000652336 | 1.424091311 |
| GATA3    | 0.836578698  | 2.118123862 | 4.172400791  | 5.50E-05 | 0.000653683 | 1.420998265 |
| FNDC3B   | -0.644305571 | 5.725839445 | -4.170771758 | 5.53E-05 | 0.00065701  | 1.415070975 |
| ATP6V0A1 | 0.835244124  | 4.329968394 | 4.167026798  | 5.61E-05 | 0.000664945 | 1.401451469 |
| BUB1B    | -0.633812741 | 4.588069214 | -4.166875955 | 5.61E-05 | 0.000664945 | 1.400903083 |
| NCR3LG1  | -0.787284485 | 2.522108946 | -4.166088177 | 5.63E-05 | 0.000666161 | 1.398039389 |
| GCH1     | 0.896749188  | 4.423953165 | 4.165272985  | 5.65E-05 | 0.000667608 | 1.39507647  |
| TSC22D3  | 0.782776566  | 7.560616866 | 4.152394327  | 5.94E-05 | 0.000696376 | 1.348325806 |
| CALR     | -0.695315948 | 9.999773734 | -4.146313948 | 6.08E-05 | 0.000710611 | 1.326291741 |
| MAF      | 0.717162859  | 2.050948606 | 4.14270821   | 6.16E-05 | 0.000715936 | 1.313236881 |
| BUB1     | -0.640091994 | 4.359068027 | -4.14015575  | 6.22E-05 | 0.000721708 | 1.304000721 |
| HEXB     | 0.638717989  | 5.337256006 | 4.137304376  | 6.29E-05 | 0.00072793  | 1.293688059 |
| DEPDC1B  | -0.652561157 | 3.561019698 | -4.13490212  | 6.35E-05 | 0.000732939 | 1.28500394  |

|          |              |             |              |          |             |             |
|----------|--------------|-------------|--------------|----------|-------------|-------------|
| ITGA7    | 0.973671866  | 2.464233437 | 4.134488352  | 6.36E-05 | 0.00073367  | 1.283508562 |
| ADD3     | 0.657498826  | 6.038658067 | 4.134086708  | 6.37E-05 | 0.000734152 | 1.282057109 |
| CDKN1A   | 1.080406911  | 5.00246818  | 4.132714203  | 6.40E-05 | 0.000736941 | 1.277097995 |
| NRBP2    | 0.873929322  | 2.686048098 | 4.130997714  | 6.45E-05 | 0.00074094  | 1.270897771 |
| NR1I2    | -0.713636558 | 2.050262322 | -4.129190832 | 6.49E-05 | 0.000745422 | 1.264373151 |
| ADGRE5   | 0.637788573  | 7.706583502 | 4.129119467  | 6.49E-05 | 0.000745422 | 1.264115497 |
| MYO1E    | 0.69507919   | 2.069297516 | 4.126589899  | 6.56E-05 | 0.000752251 | 1.254985053 |
| FYB1     | 0.672844424  | 6.701804837 | 4.123087792  | 6.64E-05 | 0.000760186 | 1.242351283 |
| PRLR     | 0.967614905  | 1.188476145 | 4.122289391  | 6.67E-05 | 0.000761706 | 1.239472219 |
| PARP14   | 0.640623044  | 5.570301233 | 4.115920915  | 6.83E-05 | 0.000777702 | 1.216522473 |
| TMEM176B | 1.564506671  | 3.247649078 | 4.115034193  | 6.85E-05 | 0.000779436 | 1.213329189 |
| PLAUR    | 0.940926126  | 4.809658668 | 4.112449426  | 6.92E-05 | 0.000786287 | 1.204023865 |
| DPYSL2   | 1.176921265  | 4.533313298 | 4.112444019  | 6.92E-05 | 0.000786287 | 1.204004404 |
| C1QC     | 1.582469831  | 2.725427506 | 4.111031176  | 6.96E-05 | 0.00078963  | 1.198919974 |
| CACNA2D3 | 0.960341461  | 1.810206296 | 4.106581933  | 7.08E-05 | 0.000799459 | 1.182917113 |
| TLN1     | 0.605433381  | 7.945676009 | 4.10487048   | 7.12E-05 | 0.000802275 | 1.176764954 |
| HLA-DQA1 | 1.309675807  | 4.246838202 | 4.101962722  | 7.20E-05 | 0.000809944 | 1.16631694  |
| PLXNC1   | 0.860553968  | 4.515434175 | 4.101364635  | 7.22E-05 | 0.000811329 | 1.164168627 |
| RNF213   | 0.61396624   | 5.942536867 | 4.096534035  | 7.36E-05 | 0.000822169 | 1.146826017 |
| SEPTIN1  | 0.654956669  | 3.677594121 | 4.094783986  | 7.40E-05 | 0.000825311 | 1.14054693  |
| PRSS57   | -1.26801037  | 8.24163735  | -4.091601614 | 7.50E-05 | 0.000833487 | 1.129134011 |
| ADAM15   | 0.606150793  | 5.668057705 | 4.08962334   | 7.55E-05 | 0.000839321 | 1.122042766 |
| GCNT2    | 0.742707883  | 2.184992366 | 4.08919837   | 7.56E-05 | 0.000840203 | 1.120519778 |
| CDK14    | -0.759088884 | 2.897264097 | -4.086123749 | 7.65E-05 | 0.000849142 | 1.109504707 |
| PM20D2   | -0.653573204 | 5.695302724 | -4.085823042 | 7.66E-05 | 0.000849632 | 1.108427744 |
| TBC1D8   | 0.745795645  | 3.871018173 | 4.080226767  | 7.83E-05 | 0.000863329 | 1.088396098 |
| PLTP     | -0.789997276 | 5.006503034 | -4.074262024 | 8.01E-05 | 0.000879854 | 1.06706874  |
| PIK3AP1  | 0.587021696  | 6.522425452 | 4.06840025   | 8.19E-05 | 0.000896146 | 1.046132907 |
| NOXA1    | 0.962762261  | 3.361168079 | 4.067831357  | 8.21E-05 | 0.000897581 | 1.044102291 |
| HAVCR2   | 0.965095465  | 4.085692229 | 4.06720863   | 8.22E-05 | 0.000899202 | 1.04187977  |
| SLC24A4  | 1.058978784  | 2.665330398 | 4.055705865  | 8.59E-05 | 0.000931492 | 1.0008733   |
| PPM1H    | -0.813657775 | 3.284255232 | -4.052629184 | 8.69E-05 | 0.000939615 | 0.989920327 |
| BCL11B   | 0.795491902  | 2.456202607 | 4.050906353  | 8.75E-05 | 0.000944912 | 0.983789848 |
| OSCAR    | 1.269907744  | 5.371567358 | 4.050534785  | 8.76E-05 | 0.000945719 | 0.982467935 |
| SAMD9L   | 0.694892317  | 5.068517746 | 4.049632576  | 8.79E-05 | 0.000947155 | 0.979258566 |
| MSRB1    | 0.716364807  | 5.248645699 | 4.04673313   | 8.89E-05 | 0.000953353 | 0.968948291 |
| STEAP4   | 0.625366271  | 0.855301692 | 4.045540369  | 8.93E-05 | 0.000956882 | 0.964708548 |
| CCL4     | 0.714787014  | 2.534537136 | 4.043557522  | 9.00E-05 | 0.000963032 | 0.95766253  |
| FMN1     | 0.642803467  | 0.923432447 | 4.04036866   | 9.11E-05 | 0.000973338 | 0.946336544 |
| MLNR     | -0.662875437 | 1.656779304 | -4.039000316 | 9.15E-05 | 0.000977631 | 0.941478664 |
| DPP4     | 0.688799952  | 1.570606436 | 4.034395119  | 9.31E-05 | 0.000992079 | 0.92513868  |
| KSR1     | 0.630114403  | 4.030734807 | 4.033304878  | 9.35E-05 | 0.000995086 | 0.921272435 |
| GABRR2   | 0.650792555  | 2.091529721 | 4.033064061  | 9.36E-05 | 0.000995447 | 0.920418554 |
| ST14     | 1.199506224  | 2.721226034 | 4.030984173  | 9.43E-05 | 0.001001658 | 0.913045371 |
| ENHO     | 0.675959451  | 0.641646404 | 4.030294277  | 9.46E-05 | 0.001003177 | 0.910600348 |
| IKZF3    | 0.745365685  | 3.261758073 | 4.029307883  | 9.49E-05 | 0.001005824 | 0.907105081 |
| PRNP     | 0.638640905  | 5.928159528 | 4.024708066  | 9.66E-05 | 0.001019003 | 0.890814456 |



|           |              |             |              |             |             |             |
|-----------|--------------|-------------|--------------|-------------|-------------|-------------|
| HLA-DQB1  | 1.425675423  | 5.311025635 | 4.018574103  | 9.89E-05    | 0.001036669 | 0.869112918 |
| SLC44A2   | 0.79158426   | 5.139382441 | 4.018317546  | 9.90E-05    | 0.001037114 | 0.868205794 |
| IRF5      | 0.630686968  | 5.830236857 | 4.015946759  | 9.99E-05    | 0.001044733 | 0.859825389 |
| PYCARD    | 0.603184065  | 5.782293231 | 4.015791514  | 9.99E-05    | 0.001044782 | 0.859276754 |
| IQGAP1    | 0.727051507  | 6.465019587 | 4.015004695  | 0.000100211 | 0.001046759 | 0.856496386 |
| MMP17     | 1.082670883  | 2.787543631 | 4.013429311  | 0.000100808 | 0.001050986 | 0.850930748 |
| IL31RA    | 0.72344343   | 0.800184855 | 4.007884085  | 0.000102934 | 0.001070602 | 0.831353612 |
| HIVEP3    | 0.66465794   | 3.378427903 | 4.007075912  | 0.000103247 | 0.001072715 | 0.828502148 |
| SPON1     | 1.180501213  | 1.581908325 | 4.006787396  | 0.00010336  | 0.001073307 | 0.827484291 |
| TNFSF13   | 0.678407928  | 4.107617136 | 4.004758274  | 0.000104151 | 0.001079801 | 0.820327337 |
| CXCL1     | 0.942843249  | 1.723405149 | 3.998365601  | 0.000106684 | 0.001103706 | 0.797798005 |
| BTG1      | 0.632446427  | 6.529325478 | 3.995464987  | 0.000107852 | 0.001112836 | 0.787584748 |
| HYAL3     | -0.815450495 | 4.370707    | -3.992214267 | 0.000109176 | 0.001124114 | 0.776145579 |
| BASP1     | 1.380685279  | 4.435116186 | 3.989937473  | 0.000110113 | 0.001130765 | 0.768137924 |
| BST1      | 0.953097856  | 4.817481794 | 3.989674457  | 0.000110222 | 0.001131284 | 0.767213106 |
| SPATS2L   | 0.706646917  | 1.570300345 | 3.988590864  | 0.000110671 | 0.001134341 | 0.763403469 |
| ACOT11    | -0.750464634 | 3.701998296 | -3.98699923  | 0.000111333 | 0.001138487 | 0.75780915  |
| TTK       | -0.599205916 | 3.496293569 | -3.982092533 | 0.000113399 | 0.00115597  | 0.740573874 |
| TTC39B    | 0.627863425  | 1.80721119  | 3.981107342  | 0.000113818 | 0.001159532 | 0.737115277 |
| GPR183    | 0.831851454  | 5.881356274 | 3.974831521  | 0.000116524 | 0.001183482 | 0.715099106 |
| APBB1     | 0.664866752  | 1.685131923 | 3.974495415  | 0.00011667  | 0.001183736 | 0.713920778 |
| GIMAP2    | 0.635996457  | 5.417910554 | 3.973224935  | 0.000117226 | 0.001188136 | 0.709467395 |
| KCNA3     | 1.006931544  | 3.645045155 | 3.971568109  | 0.000117955 | 0.001192415 | 0.703661431 |
| SQOR      | 0.587323313  | 4.744048682 | 3.96983124   | 0.000118723 | 0.001197694 | 0.697576996 |
| TRABD     | 0.596276358  | 6.323596706 | 3.967184499  | 0.000119903 | 0.001207721 | 0.688309174 |
| HIST1H3E  | 0.792571936  | 1.422312517 | 3.964307421  | 0.000121199 | 0.001220139 | 0.678240262 |
| ZNF66     | -0.641838102 | 3.833187001 | -3.961090108 | 0.000122663 | 0.00123297  | 0.666987374 |
| KLF11     | 0.979828643  | 4.067129356 | 3.953354015  | 0.000126254 | 0.001265143 | 0.639958744 |
| CTTNBP2NL | 0.682396629  | 1.899796714 | 3.952256087  | 0.000126772 | 0.00126772  | 0.636126104 |
| ACSM1     | -1.225218471 | 3.342376946 | -3.943870744 | 0.000130793 | 0.001302576 | 0.606882026 |
| NLRC5     | 0.633993283  | 5.347379889 | 3.942337114  | 0.000131542 | 0.001309359 | 0.601538706 |
| SH2B2     | 0.604762672  | 3.523484928 | 3.941617268  | 0.000131894 | 0.001312199 | 0.59903125  |
| METTL7B   | 1.329206226  | 3.135184607 | 3.940688442  | 0.000132351 | 0.001314724 | 0.595796375 |
| COCH      | -0.872242371 | 3.131143279 | -3.93917046  | 0.0001331   | 0.001320145 | 0.590510901 |
| PADI2     | 1.1418644    | 2.976435652 | 3.937700772  | 0.000133829 | 0.001324677 | 0.5853951   |
| ZNF714    | -0.60927139  | 3.774302079 | -3.936686378 | 0.000134335 | 0.001329005 | 0.581864987 |
| TEC       | -0.611881872 | 5.699855455 | -3.934176734 | 0.000135593 | 0.001338733 | 0.573134438 |
| TTYH2     | 0.596665464  | 3.886071104 | 3.930824934  | 0.000137292 | 0.001354128 | 0.561480986 |
| FUCA1     | 0.631924772  | 4.563612851 | 3.927677842  | 0.000138905 | 0.001367019 | 0.550546334 |
| VCL       | 0.627678046  | 5.852328408 | 3.925911748  | 0.000139818 | 0.001373476 | 0.544412999 |
| CD79B     | 0.743659615  | 4.689142297 | 3.921085121  | 0.000142343 | 0.00139378  | 0.527661987 |
| STK17B    | 0.588126792  | 6.587985643 | 3.9207728    | 0.000142508 | 0.00139378  | 0.526578619 |
| ZBED3     | -0.690507831 | 4.343554387 | -3.918046723 | 0.000143954 | 0.001404573 | 0.517125379 |
| NEIL3     | -0.722425686 | 3.664156633 | -3.917972509 | 0.000143994 | 0.001404573 | 0.516868099 |
| SAMSN1    | 0.61363814   | 5.484405426 | 3.914382704  | 0.000145921 | 0.001420398 | 0.504427749 |
| PTK2      | 1.05063189   | 1.83990499  | 3.913734647  | 0.000146271 | 0.00142251  | 0.502182885 |
| TNS3      | 0.952912567  | 4.626499807 | 3.912936618  | 0.000146704 | 0.001424582 | 0.499418913 |

|          |              |             |              |             |             |              |
|----------|--------------|-------------|--------------|-------------|-------------|--------------|
| ASIC1    | -0.733319867 | 1.040589693 | -3.90982475  | 0.000148403 | 0.001439643 | 0.4886452    |
| LPO      | -1.495342081 | 3.69212961  | -3.905149775 | 0.000150991 | 0.001458927 | 0.47247244   |
| PTK6     | 0.617167536  | 2.341885982 | 3.900357787  | 0.000153688 | 0.001482043 | 0.455910646  |
| CABLES1  | -0.877158823 | 2.5999054   | -3.898490603 | 0.000154751 | 0.001490818 | 0.449461718  |
| TMIGD3   | 0.64919793   | 1.44600248  | 3.89279274   | 0.000158039 | 0.001517235 | 0.42979729   |
| SPINT1   | 0.994678288  | 3.530351217 | 3.890057397  | 0.000159641 | 0.00153035  | 0.42036513   |
| ULK2     | 0.709344336  | 2.719540466 | 3.88421819   | 0.000163112 | 0.001555965 | 0.400247502  |
| EVI5     | 0.590493528  | 3.167106133 | 3.879806287  | 0.000165783 | 0.001578784 | 0.385063095  |
| KLRF1    | 0.835453673  | 2.723356788 | 3.877572797  | 0.000167151 | 0.001589035 | 0.377381296  |
| ARHGAP4  | 0.843837296  | 6.870642265 | 3.875085932  | 0.000168686 | 0.001598946 | 0.368832146  |
| IFI44    | 0.735949444  | 5.361268398 | 3.871527145  | 0.000170907 | 0.001616847 | 0.356605544  |
| PRF1     | 0.906320781  | 4.424196056 | 3.858273292  | 0.000179425 | 0.00168433  | 0.311148447  |
| CATSPER1 | 0.606700521  | 1.665102469 | 3.853546047  | 0.00018256  | 0.001709985 | 0.294965067  |
| HLA-DQB2 | 1.181015663  | 2.484444103 | 3.853489775  | 0.000182598 | 0.001709985 | 0.294772517  |
| PLBD2    | 0.604413134  | 5.026580229 | 3.851096451  | 0.000184205 | 0.001723377 | 0.286585219  |
| THBS1    | 1.433708369  | 3.197779175 | 3.848207999  | 0.000186162 | 0.001736682 | 0.276709495  |
| TGFBR3   | 0.602187692  | 1.659459846 | 3.846829857  | 0.000187103 | 0.001741215 | 0.271999641  |
| SLC27A2  | -0.79318276  | 3.911035762 | -3.846710234 | 0.000187185 | 0.001741215 | 0.271590889  |
| DNM1     | -1.049395273 | 4.057263856 | -3.845523734 | 0.000187999 | 0.001745284 | 0.267537148  |
| CCL3L1   | 0.94456538   | 2.414699514 | 3.842459287  | 0.000190117 | 0.001760348 | 0.257071875  |
| SCML4    | 0.696585543  | 1.861848547 | 3.842417261  | 0.000190147 | 0.001760348 | 0.256928402  |
| UGT3A2   | -1.469712619 | 1.916854298 | -3.835206362 | 0.000195221 | 0.001800476 | 0.23232901   |
| TMEM63C  | 0.62515658   | 0.859533921 | 3.817307087  | 0.00020838  | 0.001900224 | 0.171425381  |
| GAS7     | 0.838588927  | 5.46310221  | 3.815244179  | 0.00020995  | 0.001910549 | 0.16442071   |
| TNNT1    | 1.014513178  | 1.50051106  | 3.815174152  | 0.000210003 | 0.001910549 | 0.164182983  |
| GCA      | 0.597140135  | 5.784868002 | 3.812190739  | 0.000212294 | 0.001929583 | 0.154058168  |
| GBP5     | 0.761258911  | 3.895349187 | 3.809453566  | 0.000214416 | 0.001943426 | 0.144774555  |
| LGALS9   | 0.693130218  | 6.14920072  | 3.800956263  | 0.000221134 | 0.001993173 | 0.115988181  |
| SH2D2A   | 0.645673063  | 2.551340453 | 3.79438596   | 0.000226464 | 0.002027137 | 0.093764971  |
| TSP0     | 0.699173912  | 6.965112357 | 3.794057544  | 0.000226734 | 0.002028617 | 0.092654948  |
| SELL     | 1.033474582  | 8.182077092 | 3.792177812  | 0.000228283 | 0.002039664 | 0.086303063  |
| GAMT     | -0.617482631 | 4.293350169 | -3.788497215 | 0.000231345 | 0.002061348 | 0.073873054  |
| QPRT     | -0.711605525 | 3.746716093 | -3.784812783 | 0.00023445  | 0.002080438 | 0.061439718  |
| SERPINF2 | 0.602484911  | 2.309178666 | 3.783310919  | 0.000235727 | 0.002089862 | 0.056374357  |
| LRP12    | -0.629261102 | 2.314729506 | -3.783178043 | 0.00023584  | 0.002089914 | 0.055926282  |
| RTL5     | 0.813234609  | 2.718172531 | 3.780968686  | 0.000237731 | 0.002102843 | 0.048477863  |
| PLAU     | -0.752746964 | 3.820487481 | -3.779610716 | 0.000238901 | 0.002112228 | 0.043901456  |
| EMID1    | -1.063499628 | 4.730993841 | -3.777190143 | 0.000240999 | 0.002128845 | 0.035747284  |
| FMNL2    | 0.684712489  | 2.221332519 | 3.775927689  | 0.000242101 | 0.002136634 | 0.031496116  |
| SORBS3   | 0.805096044  | 3.553110195 | 3.76364349   | 0.000253069 | 0.002216345 | -0.00981029  |
| SLFN12L  | 0.627669119  | 2.794212902 | 3.760398593  | 0.000256044 | 0.002235934 | -0.020703516 |
| POU2AF1  | 0.703759321  | 2.303866004 | 3.758571897  | 0.000257733 | 0.002248089 | -0.026832487 |
| CD93     | 1.306484229  | 5.066013782 | 3.75806171   | 0.000258207 | 0.002251212 | -0.028543855 |
| SNX10    | 0.845758988  | 4.968440172 | 3.753929249  | 0.000262074 | 0.002279825 | -0.042398897 |
| CPM      | 1.01636445   | 2.211191747 | 3.752134783  | 0.000263771 | 0.002292728 | -0.048411466 |
| ZBTB38   | 0.673894154  | 2.782506436 | 3.75106017   | 0.000264792 | 0.002300379 | -0.052010984 |
| TMEM144  | 0.633240346  | 2.130255596 | 3.750920247  | 0.000264925 | 0.002300509 | -0.052479608 |

|           |              |             |              |             |             |              |
|-----------|--------------|-------------|--------------|-------------|-------------|--------------|
| LTB4R     | 0.608489888  | 5.596236737 | 3.748257177  | 0.000267472 | 0.002319525 | -0.061395986 |
| KIF1B     | 0.679999928  | 3.468558758 | 3.745988446  | 0.000269661 | 0.002336421 | -0.068988058 |
| TCF7      | 0.673714665  | 3.571056499 | 3.744535073  | 0.000271072 | 0.0023476   | -0.073849686 |
| LPAR4     | -0.919970372 | 2.812324155 | -3.742994612 | 0.000272575 | 0.002358518 | -0.079000981 |
| IL18RAP   | 0.758192338  | 2.178802968 | 3.739968741  | 0.00027555  | 0.002378975 | -0.089114535 |
| SEMA4A    | 0.785311711  | 5.010098683 | 3.738313816  | 0.000277191 | 0.002388897 | -0.094643119 |
| SCML1     | 0.653429133  | 1.643529228 | 3.736425924  | 0.000279073 | 0.002402993 | -0.100947579 |
| UBASH3A   | 0.714427568  | 2.18818968  | 3.732045718  | 0.000283488 | 0.002433469 | -0.115565086 |
| MARCKS    | 1.08948931   | 3.66690323  | 3.731823693  | 0.000283713 | 0.002434331 | -0.116305654 |
| GPAT3     | 1.090638076  | 3.127638741 | 3.730392615  | 0.000285171 | 0.00244253  | -0.121078202 |
| EVI2A     | 0.618267937  | 6.220863724 | 3.726277045  | 0.000289403 | 0.002473334 | -0.134795161 |
| MEX3B     | -0.899647641 | 3.932182179 | -3.714468874 | 0.000301877 | 0.002558595 | -0.174083645 |
| TREML1    | 0.815931246  | 1.807884525 | 3.712504356  | 0.000304002 | 0.002574357 | -0.180610324 |
| C15orf39  | 0.661869449  | 6.194019196 | 3.70854594   | 0.000308325 | 0.002601909 | -0.19375286  |
| ZNF117    | -0.602881661 | 4.523526919 | -3.700769859 | 0.000316988 | 0.00265887  | -0.219537779 |
| USP41     | -0.708047463 | 1.479656364 | -3.69990842  | 0.000317961 | 0.002663594 | -0.222391568 |
| CDCA2     | -0.594691036 | 3.154647999 | -3.698445348 | 0.000319622 | 0.00267635  | -0.227237231 |
| CBX2      | -0.991349476 | 3.960311897 | -3.696964563 | 0.00032131  | 0.002688177 | -0.23213999  |
| STS       | 0.763191231  | 3.004809289 | 3.695384032  | 0.000323122 | 0.002702088 | -0.237371251 |
| PRKCH     | 0.758020599  | 3.742416911 | 3.693496876  | 0.000325298 | 0.002716338 | -0.243615026 |
| RTP4      | 0.790374785  | 2.912683516 | 3.693045596  | 0.000325821 | 0.002717957 | -0.245107736 |
| MXD1      | 0.588326456  | 5.944898031 | 3.690888102  | 0.000328329 | 0.002730748 | -0.252242089 |
| HCST      | 0.705171207  | 6.63175077  | 3.687122719  | 0.000332751 | 0.002761335 | -0.264685329 |
| HAPLN3    | 0.62679679   | 1.910784106 | 3.686441459  | 0.000333557 | 0.002766844 | -0.266935552 |
| PLXNB1    | -0.921571304 | 2.672848689 | -3.683681084 | 0.000336842 | 0.00278815  | -0.276049736 |
| NKD1      | -0.608264332 | 1.089040709 | -3.671885695 | 0.000351226 | 0.002890006 | -0.314933584 |
| CXCR3     | 0.707771364  | 2.279373201 | 3.671644798  | 0.000351526 | 0.002890894 | -0.31572666  |
| PRRT4     | -1.267678073 | 2.861537933 | -3.671504635 | 0.000351701 | 0.002890894 | -0.31618808  |
| CDH24     | -0.744037573 | 2.585694145 | -3.669489551 | 0.000354219 | 0.002907252 | -0.322820238 |
| AFF2      | -0.993027357 | 2.184508503 | -3.663708353 | 0.000361538 | 0.002958274 | -0.341831308 |
| NDFIP1    | 0.809309094  | 5.279553457 | 3.658927847  | 0.000367698 | 0.003002685 | -0.357533366 |
| MMP25     | 0.791010254  | 3.091352037 | 3.655221352  | 0.000372542 | 0.003033334 | -0.369696312 |
| KIT       | -1.037687174 | 6.506151086 | -3.651939096 | 0.000376882 | 0.003062266 | -0.380458778 |
| CD40LG    | 0.654075399  | 2.298772453 | 3.648716256  | 0.00038119  | 0.003088244 | -0.391018806 |
| SCN3A     | 0.861163852  | 0.832290487 | 3.647296314  | 0.000383103 | 0.003100306 | -0.395669022 |
| GNPDA1    | 0.720377563  | 4.096552253 | 3.641996868  | 0.000390322 | 0.003149118 | -0.413011405 |
| RTN4R     | -0.926525837 | 3.204676537 | -3.640765522 | 0.000392018 | 0.003157563 | -0.417038046 |
| PEAK3     | 0.612412994  | 4.075506288 | 3.637285877  | 0.000396848 | 0.003184592 | -0.428410916 |
| SIX3      | -1.216608791 | 0.922184357 | -3.635326928 | 0.000399592 | 0.00319739  | -0.434809661 |
| CD180     | 1.098810368  | 4.719905431 | 3.634450452  | 0.000400825 | 0.003204314 | -0.437671693 |
| RASGRP1   | 0.628120297  | 3.265602154 | 3.632745952  | 0.000403234 | 0.003216767 | -0.44323594  |
| RUBCNL    | 0.843823359  | 2.384711312 | 3.631579283  | 0.000404891 | 0.003221287 | -0.447043246 |
| EGR3      | 0.942364483  | 2.223354785 | 3.631575832  | 0.000404896 | 0.003221287 | -0.447054506 |
| SUCLG2    | 0.883786139  | 3.960445568 | 3.629268072  | 0.000408192 | 0.003242208 | -0.454582717 |
| GABARAPL1 | 0.669863232  | 4.156290138 | 3.628311768  | 0.000409565 | 0.003251788 | -0.457701167 |
| TBC1D12   | 0.70403008   | 1.032193487 | 3.620725048  | 0.000420615 | 0.003328658 | -0.482417348 |
| NT5M      | -0.594830242 | 4.115793437 | -3.619940637 | 0.000421774 | 0.003336469 | -0.484970421 |

|           |              |             |              |             |             |              |
|-----------|--------------|-------------|--------------|-------------|-------------|--------------|
| TCN2      | 1.048440146  | 3.927236873 | 3.613695432  | 0.000431105 | 0.003399231 | -0.505281057 |
| PRELID3A  | -0.692947453 | 2.497185674 | -3.607266304 | 0.000440914 | 0.003456968 | -0.526160051 |
| P2RY12    | 0.66714406   | 1.396756718 | 3.598049266  | 0.000455346 | 0.003560078 | -0.556040162 |
| TNFRSF11A | 0.636503289  | 1.094071037 | 3.596941402  | 0.00045711  | 0.003571003 | -0.559627481 |
| DEPTOR    | -0.77821782  | 5.004020847 | -3.594699142 | 0.000460701 | 0.003594725 | -0.56688528  |
| PF4       | 1.50661183   | 3.410909156 | 3.593588917  | 0.000462489 | 0.003603791 | -0.570477517 |
| AMIGO2    | 0.591159669  | 1.630772868 | 3.584695187  | 0.000477048 | 0.00368973  | -0.599221346 |
| GRAP2     | 0.779063744  | 2.724727125 | 3.581188186  | 0.000482907 | 0.003723208 | -0.610539723 |
| CARD11    | 0.793670889  | 3.940988013 | 3.57398414   | 0.000495157 | 0.003799438 | -0.633761441 |
| ZNF610    | -0.585681624 | 2.332072247 | -3.573881885 | 0.000495333 | 0.003799438 | -0.634090778 |
| SLC35F2   | -0.590695232 | 3.834807048 | -3.561567233 | 0.00051696  | 0.003929707 | -0.673696736 |
| C3AR1     | 0.99391892   | 5.340604467 | 3.55679161   | 0.000525585 | 0.003984371 | -0.689025839 |
| MLC1      | -0.810703087 | 6.332371237 | -3.555315108 | 0.000528279 | 0.004000932 | -0.693761803 |
| TCF7L2    | 0.68790108   | 4.224430143 | 3.545789376  | 0.000545973 | 0.004106932 | -0.724277422 |
| CARMIL1   | 0.698711949  | 1.908409503 | 3.537262863  | 0.000562283 | 0.004202011 | -0.751535131 |
| NR5A1     | -0.628572018 | 1.107224275 | -3.5338026   | 0.000569033 | 0.004239647 | -0.762581607 |
| PTGER4    | 0.668504523  | 5.577228157 | 3.533787359  | 0.000569063 | 0.004239647 | -0.762630243 |
| NELL2     | 0.585282877  | 1.48520292  | 3.530374954  | 0.000575794 | 0.004275064 | -0.773515207 |
| DYSF      | 1.032360853  | 4.462922695 | 3.529290117  | 0.000577949 | 0.004286162 | -0.776973836 |
| CLEC12A   | 0.762127957  | 6.355024102 | 3.5216792    | 0.000593287 | 0.004381539 | -0.801214076 |
| EPCAM     | -1.018229148 | 1.649854596 | -3.520990691 | 0.000594693 | 0.004388594 | -0.803404809 |
| LY6G6E    | 0.634957193  | 0.793315993 | 3.514484039  | 0.000608138 | 0.004460748 | -0.824090609 |
| NTNG2     | -1.333994741 | 4.286235957 | -3.513320024 | 0.000610573 | 0.004475237 | -0.827787902 |
| EPHB3     | 0.770661739  | 1.559184593 | 3.508217892  | 0.000621356 | 0.004532081 | -0.843982056 |
| PTP4A3    | 0.925776496  | 3.615518525 | 3.499956803  | 0.000639196 | 0.004639597 | -0.870161648 |
| ARID5B    | 0.653838046  | 3.54446396  | 3.493235434  | 0.000654066 | 0.004728127 | -0.891424314 |
| CLIC3     | 0.634186016  | 1.698721265 | 3.49168655   | 0.000657538 | 0.004746176 | -0.896319345 |
| MANSC1    | 0.675786784  | 1.859654071 | 3.488172443  | 0.000665481 | 0.004788362 | -0.907418544 |
| HBEGF     | 1.015091181  | 4.001547146 | 3.487692999  | 0.000666571 | 0.004790057 | -0.908932141 |
| CYSTM1    | 0.66189274   | 3.2275145   | 3.482700169  | 0.000678029 | 0.004849115 | -0.924684199 |
| SMARCD3   | 0.764645728  | 3.307489448 | 3.480775376  | 0.000682495 | 0.004872429 | -0.930751824 |
| RAB11FIP5 | 0.714652691  | 1.325299792 | 3.474562706  | 0.000697101 | 0.004945184 | -0.950317449 |
| BEND6     | -0.816349297 | 1.326802914 | -3.473540033 | 0.000699533 | 0.004957359 | -0.953535396 |
| GGT7      | 0.654070456  | 3.335034869 | 3.471483211  | 0.000704449 | 0.004978318 | -0.96000503  |
| EIF4E3    | 0.820511851  | 4.232426005 | 3.470888476  | 0.000705876 | 0.004984161 | -0.961875151 |
| ME1       | 0.898606762  | 1.68275917  | 3.469661521  | 0.00070883  | 0.004997763 | -0.965732426 |
| KIAA1958  | -0.614283183 | 3.055285597 | -3.462318066 | 0.000726751 | 0.005100099 | -0.988795041 |
| PTGIR     | 0.944135502  | 2.96723982  | 3.457837601  | 0.000737894 | 0.005168974 | -1.002846392 |
| IL1R2     | 1.124415608  | 1.392422779 | 3.45473038   | 0.000745715 | 0.005212505 | -1.012582216 |
| RAB7B     | -1.050303797 | 4.760865621 | -3.450693436 | 0.000755993 | 0.005271095 | -1.025220311 |
| PTGDR     | 0.625689925  | 1.661772557 | 3.450067862  | 0.000757598 | 0.005280391 | -1.027177641 |
| KLRC4     | 0.623512101  | 1.573667014 | 3.449442259  | 0.000759206 | 0.005289703 | -1.029134772 |
| BST2      | 0.603569582  | 7.070199666 | 3.448101455  | 0.000762662 | 0.005304293 | -1.033328336 |
| MMP15     | -0.825380446 | 1.838019207 | -3.440945662 | 0.000781362 | 0.005420789 | -1.055686301 |
| SPRY2     | -0.961584728 | 4.097991068 | -3.434435995 | 0.000798747 | 0.005515834 | -1.075992016 |
| PHGR1     | -0.618785118 | 2.232867387 | -3.433958007 | 0.000800038 | 0.00551968  | -1.077481754 |
| CRYBG3    | 0.783719996  | 2.563058645 | 3.432834443  | 0.00080308  | 0.005535929 | -1.080982874 |

|            |              |             |              |             |             |              |
|------------|--------------|-------------|--------------|-------------|-------------|--------------|
| ATXN1      | 0.685576762  | 3.163401902 | 3.423986954  | 0.000827414 | 0.005659567 | -1.108519154 |
| MPZL2      | 0.651234361  | 1.095138801 | 3.423470307  | 0.000828856 | 0.005667439 | -1.110125305 |
| OPTN       | 0.742956672  | 3.244693529 | 3.423205122  | 0.000829597 | 0.005668523 | -1.110949633 |
| FOS        | 0.803165346  | 9.732916802 | 3.416532335  | 0.000848452 | 0.005777073 | -1.131674535 |
| DAGLA      | 0.75229349   | 2.025476757 | 3.40281972   | 0.000888468 | 0.005997084 | -1.174158742 |
| ST6GALNAC4 | 0.590847033  | 4.164345554 | 3.401032941  | 0.000893811 | 0.006018534 | -1.179684041 |
| KLRG1      | 0.598278629  | 3.289808363 | 3.398721683  | 0.000900767 | 0.006061175 | -1.186827609 |
| ANKRD18B   | -1.085078867 | 1.795131628 | -3.397118726 | 0.00090562  | 0.006089624 | -1.191779609 |
| FCRLA      | 0.673188602  | 1.939993212 | 3.396685482  | 0.000906936 | 0.006094262 | -1.19311769  |
| FAM151B    | 0.592843825  | 2.210438702 | 3.394404727  | 0.000913894 | 0.00612832  | -1.2001595   |
| TREML4     | 0.627865912  | 1.200027807 | 3.393531643  | 0.000916571 | 0.006142036 | -1.202854095 |
| ABCA9      | 0.588737991  | 0.950686221 | 3.392443403  | 0.000919918 | 0.006158101 | -1.206211914 |
| ADGRA3     | -0.624180332 | 3.629538884 | -3.391492372 | 0.000922852 | 0.006165018 | -1.209145636 |
| TOP2A      | -0.683247275 | 5.738147062 | -3.390634622 | 0.000925506 | 0.006180624 | -1.211791019 |
| TRPS1      | 0.994863048  | 2.871140871 | 3.388571103  | 0.000931919 | 0.006211844 | -1.218152818 |
| SGPP1      | 0.915606511  | 2.760898048 | 3.38803782   | 0.000933584 | 0.006219402 | -1.219796395 |
| MDFIC      | 0.859471477  | 4.598136091 | 3.38794643   | 0.000933869 | 0.006219402 | -1.22007804  |
| ZBTB8A     | -0.641564772 | 2.504547824 | -3.387629379 | 0.00093486  | 0.006223872 | -1.221055065 |
| CACNB1     | 0.61334684   | 2.781458024 | 3.386960048  | 0.000936956 | 0.00623569  | -1.223117431 |
| HSPA4L     | -0.591381295 | 1.259430006 | -3.384273315 | 0.000945411 | 0.006279081 | -1.231392468 |
| DDIT4      | 1.019541214  | 4.442803153 | 3.382883849  | 0.000949812 | 0.006304007 | -1.235669821 |
| GFI1       | -0.879272674 | 5.958782307 | -3.375553236 | 0.000973351 | 0.006431287 | -1.258212216 |
| LAG3       | 0.715322929  | 1.672892815 | 3.371055593  | 0.000988062 | 0.006515651 | -1.27202272  |
| ITGB5      | 0.612898105  | 1.690546027 | 3.370168008  | 0.00099099  | 0.00652832  | -1.274746329 |
| PKIB       | 0.698056352  | 1.289237565 | 3.369298182  | 0.000993867 | 0.006542843 | -1.277414862 |
| HDAC9      | 0.778491909  | 2.755337467 | 3.364772783  | 0.001008961 | 0.006637722 | -1.291289012 |
| AMN        | -0.748454004 | 2.833381152 | -3.364104661 | 0.001011208 | 0.006650254 | -1.293336049 |
| MRC2       | -1.064737538 | 3.620030146 | -3.362120172 | 0.001017908 | 0.006689799 | -1.299414247 |
| CXCR4      | 0.672656406  | 8.165035875 | 3.361857772  | 0.001018797 | 0.006693382 | -1.300217716 |
| TBX1       | -0.70986741  | 1.741086836 | -3.356404139 | 0.001037442 | 0.006799803 | -1.316904858 |
| TNFRSF10C  | 0.720294932  | 2.39528954  | 3.354146298  | 0.001045254 | 0.006837189 | -1.323806809 |
| GALM       | 0.590862688  | 2.890048393 | 3.352182028  | 0.001052095 | 0.006875004 | -1.32980819  |
| EDA2R      | -0.834229121 | 2.526304305 | -3.347911197 | 0.001067114 | 0.006956794 | -1.342846581 |
| STARD8     | 0.806008978  | 3.45278422  | 3.339601819  | 0.001096911 | 0.007126489 | -1.368174321 |
| GDF15      | 0.585462793  | 1.292156525 | 3.33464621   | 0.001115051 | 0.007206539 | -1.383254353 |
| COPZ2      | 0.588895826  | 1.381194266 | 3.334135864  | 0.001116935 | 0.007216318 | -1.384806279 |
| TLR2       | 0.834504722  | 6.243757747 | 3.33021909   | 0.001131493 | 0.007295842 | -1.396710293 |
| MYBPH      | 0.713974189  | 0.907683858 | 3.326399939  | 0.001145859 | 0.007376253 | -1.408306297 |
| ADCY4      | 0.615798127  | 2.367364681 | 3.321739152  | 0.001163622 | 0.00747145  | -1.422442608 |
| DLL3       | -0.671532767 | 0.596299306 | -3.316097748 | 0.001185466 | 0.007563663 | -1.439530886 |
| PDE4B      | 0.734158002  | 3.808307207 | 3.313798571  | 0.001194478 | 0.007611857 | -1.44648828  |
| RTN2       | 0.598348489  | 2.47485012  | 3.311625192  | 0.001203057 | 0.007646043 | -1.453061276 |
| STOX2      | -0.658639821 | 0.80288242  | -3.309597676 | 0.001211111 | 0.007679444 | -1.459189868 |
| NEURL1     | 0.631725274  | 1.82975821  | 3.309297813  | 0.001212306 | 0.007681193 | -1.460095998 |
| TMEM51     | 0.860537204  | 2.779503402 | 3.309231489  | 0.001212571 | 0.007681193 | -1.460296407 |
| AIFM3      | 0.712258552  | 2.59887262  | 3.309054743  | 0.001213276 | 0.00768316  | -1.46083046  |
| TSPOAP1    | -0.815876867 | 5.985814107 | -3.30857982  | 0.001215173 | 0.00769267  | -1.46226536  |

|            |              |             |              |             |             |              |
|------------|--------------|-------------|--------------|-------------|-------------|--------------|
| CEP70      | -0.632451529 | 3.708791317 | -3.306377416 | 0.001224007 | 0.007723466 | -1.468917285 |
| SEMA3C     | 0.62768689   | 0.784981063 | 3.303753748  | 0.001234608 | 0.007782626 | -1.476836695 |
| RNASE1     | 0.909445902  | 2.32543554  | 3.302215494  | 0.001240864 | 0.00781463  | -1.481477378 |
| IRX5       | -0.919365422 | 1.109250947 | -3.298802716 | 0.001254848 | 0.007884837 | -1.49176672  |
| TC2N       | 0.777300226  | 2.809561511 | 3.293163844  | 0.001278277 | 0.007998479 | -1.508747988 |
| RAB38      | -0.77366557  | 2.658579175 | -3.292519533 | 0.00128098  | 0.008010028 | -1.510686752 |
| GNG11      | 0.881584481  | 1.512765121 | 3.292418106  | 0.001281406 | 0.008010028 | -1.510991922 |
| AHR        | 0.955231927  | 5.62403484  | 3.292331633  | 0.001281769 | 0.008010028 | -1.511252089 |
| PHLDA3     | -0.587768026 | 2.073338517 | -3.288502878 | 0.001297951 | 0.008090364 | -1.522765849 |
| DES        | 0.614010378  | 0.831164195 | 3.284687352  | 0.001314266 | 0.008176346 | -1.534228591 |
| HENMT1     | -0.680688934 | 4.991676451 | -3.283826853 | 0.001317971 | 0.008191544 | -1.536812183 |
| YES1       | -0.633122838 | 3.352428673 | -3.283691896 | 0.001318554 | 0.008192545 | -1.537217329 |
| ATP10A     | 0.99949229   | 2.886096562 | 3.282750058  | 0.001322623 | 0.008212583 | -1.540044383 |
| STARD4     | 0.652527472  | 3.59611447  | 3.279602465  | 0.001336306 | 0.008279057 | -1.549487347 |
| B3GALNT1   | -0.588351393 | 3.494199047 | -3.279299712 | 0.001337629 | 0.008282729 | -1.550395223 |
| EVL        | 0.598547384  | 4.814909547 | 3.271919325  | 0.001370264 | 0.008422407 | -1.572505116 |
| ST3GAL4    | -0.64158634  | 4.944078384 | -3.270511616 | 0.001376573 | 0.008453173 | -1.576717505 |
| CLEC11A    | -1.264617103 | 7.955764675 | -3.263370767 | 0.001408993 | 0.008611494 | -1.59806199  |
| NCR1       | 0.594506076  | 1.547804541 | 3.259396326  | 0.001427344 | 0.008696342 | -1.60992479  |
| NKG7       | 0.679938546  | 7.210191927 | 3.2570706    | 0.001438186 | 0.008745968 | -1.616860881 |
| SLC12A7    | 0.645929953  | 5.432549609 | 3.254698295  | 0.001449324 | 0.008797207 | -1.623931573 |
| PADI4      | 0.85826107   | 4.937899704 | 3.251623161  | 0.001463882 | 0.00885794  | -1.633090574 |
| GBP4       | 1.027781336  | 4.302520466 | 3.248343167  | 0.001479559 | 0.00893336  | -1.642851655 |
| LG MN      | 0.718010717  | 2.308126431 | 3.247590735  | 0.001483177 | 0.008952006 | -1.645089677 |
| PDZD8      | -0.622106206 | 4.840937365 | -3.247119051 | 0.00148545  | 0.008960588 | -1.646492421 |
| AC099489.1 | -0.989534552 | 2.892580398 | -3.245365205 | 0.001493928 | 0.009000571 | -1.651706684 |
| C11orf21   | 0.747741462  | 5.953283649 | 3.242480601  | 0.001507971 | 0.009071133 | -1.660277557 |
| VENTX      | 1.076488727  | 2.165945165 | 3.240638756  | 0.001517002 | 0.009097335 | -1.665746756 |
| DUSP5      | 0.629141969  | 3.618618852 | 3.238497739  | 0.001527563 | 0.00914939  | -1.672101013 |
| CAVIN3     | 0.68803319   | 0.941463796 | 3.235330389  | 0.001543312 | 0.009221166 | -1.681494766 |
| HOXB2      | 1.181675033  | 3.181611844 | 3.235289378  | 0.001543517 | 0.009221166 | -1.681616345 |
| LD OC1     | 0.804948669  | 1.469651518 | 3.233573782  | 0.001552111 | 0.009253702 | -1.686701166 |
| CENPF      | -0.596257529 | 4.571072433 | -3.221501104 | 0.001613864 | 0.009561726 | -1.722418456 |
| TGM5       | -0.745673163 | 1.127525146 | -3.218018596 | 0.001632097 | 0.009653682 | -1.732700465 |
| GCAT       | -0.604689012 | 3.117231465 | -3.217029511 | 0.001637311 | 0.009670463 | -1.735618988 |
| MT1E       | 0.74914553   | 1.58692208  | 3.216389851  | 0.001640691 | 0.009683908 | -1.73750605  |
| KLHDC7B    | 0.585791043  | 2.903306329 | 3.215035294  | 0.00164787  | 0.009708612 | -1.741501073 |
| RUSC2      | 0.629661274  | 4.481779974 | 3.193252507  | 0.001767405 | 0.01027905  | -1.805549018 |
| ZBED2      | -0.877401423 | 3.000289049 | -3.190708855 | 0.001781878 | 0.010347759 | -1.813003965 |
| SAMD11     | -0.759068191 | 1.983054079 | -3.18730345  | 0.001801426 | 0.010439473 | -1.822976622 |
| DUSP2      | 0.618154798  | 4.937634443 | 3.182929098  | 0.001826829 | 0.010555253 | -1.835773509 |
| RHOBTB1    | -0.728307641 | 2.899972978 | -3.181745819 | 0.001833758 | 0.010585856 | -1.839232544 |
| TBC1D16    | -0.64010911  | 2.497811255 | -3.180291497 | 0.001842307 | 0.010622604 | -1.843482406 |
| MOB3B      | 0.590976477  | 2.714334801 | 3.175695521  | 0.001869568 | 0.010757478 | -1.856902015 |
| ALS2       | -0.612869831 | 4.445526631 | -3.175356601 | 0.001871593 | 0.010765947 | -1.85789096  |
| NID1       | 1.150879433  | 3.717340521 | 3.174884571  | 0.001874417 | 0.010779005 | -1.859268158 |
| AKAP7      | 0.654276675  | 2.953978147 | 3.172083496  | 0.001891255 | 0.010846988 | -1.86743701  |

|          |              |             |              |             |             |              |
|----------|--------------|-------------|--------------|-------------|-------------|--------------|
| TPPP3    | 0.943372098  | 2.138262478 | 3.171230318  | 0.001896412 | 0.010866955 | -1.869923935 |
| CDCA7    | -0.737234253 | 5.705821933 | -3.168799046 | 0.001911179 | 0.010932257 | -1.877007709 |
| BLNK     | 1.041275588  | 3.212667832 | 3.166370465  | 0.001926036 | 0.010991393 | -1.884079012 |
| MDFI     | -1.07986887  | 2.764564686 | -3.16384759  | 0.001941583 | 0.011041263 | -1.89141997  |
| CLEC2B   | 0.778656252  | 5.137752506 | 3.160996404  | 0.001959294 | 0.011119234 | -1.899710222 |
| RTL8C    | 1.053265453  | 4.119097256 | 3.156363116  | 0.001988395 | 0.011237996 | -1.913168586 |
| TJP2     | 0.649906083  | 3.299970732 | 3.155743914  | 0.001992314 | 0.011247586 | -1.914965913 |
| HIP1     | 0.684846262  | 4.81977791  | 3.135877859  | 0.002121933 | 0.011852127 | -1.972470041 |
| SLC7A5   | -0.683848917 | 5.700666571 | -3.133048388 | 0.002141018 | 0.011941591 | -1.980634921 |
| TMEM268  | 0.591285998  | 4.115626698 | 3.111807886  | 0.002289453 | 0.012635493 | -2.041725992 |
| DOCK10   | 0.586654214  | 4.764423056 | 3.105663942  | 0.002334134 | 0.01280582  | -2.059330476 |
| KCNE5    | -1.502649098 | 2.516532709 | -3.095778861 | 0.00240772  | 0.013131794 | -2.08759186  |
| CCL5     | 0.670028309  | 5.873769884 | 3.093399549  | 0.002425751 | 0.01320792  | -2.094382739 |
| SPTLC3   | -0.602709446 | 1.678293324 | -3.092714841 | 0.002430962 | 0.013228894 | -2.096336155 |
| BIVM     | -0.619636702 | 3.378769274 | -3.092029935 | 0.002436186 | 0.01324991  | -2.098289766 |
| ZNF804A  | -0.763892351 | 2.996961914 | -3.090099814 | 0.002450962 | 0.013305136 | -2.103793197 |
| MSRB3    | -0.643577996 | 5.761998138 | -3.069305933 | 0.002615502 | 0.014056245 | -2.162896021 |
| CAMK1D   | 0.704574381  | 3.96683126  | 3.068175941  | 0.002624729 | 0.01409805  | -2.16609797  |
| ZAP70    | 0.79274174   | 3.982326633 | 3.063417357  | 0.00266392  | 0.014274157 | -2.179570761 |
| SERPINB6 | 0.808975952  | 5.624853555 | 3.055779765  | 0.002727954 | 0.014520239 | -2.201157069 |
| TLR10    | 0.594142938  | 2.241542677 | 3.054854996  | 0.002735804 | 0.014550079 | -2.203767611 |
| PTGR1    | -0.599976612 | 2.188644271 | -3.051489161 | 0.002764548 | 0.014682891 | -2.213263309 |
| CPNE8    | 1.192218283  | 3.388980725 | 3.037880686  | 0.002883635 | 0.015203344 | -2.251563377 |
| HIST1H1C | 0.666719315  | 5.0569196   | 3.029769159  | 0.002956854 | 0.015517901 | -2.274322294 |
| SMIM24   | -0.841283944 | 6.145034541 | -3.028653949 | 0.002967053 | 0.015560432 | -2.277447181 |
| DOC2A    | -0.613107795 | 2.158506533 | -3.027735892 | 0.002975474 | 0.015582005 | -2.280018885 |
| VAV2     | 0.609252385  | 3.616443724 | 3.026459605  | 0.002987218 | 0.015626681 | -2.283592957 |
| MILR1    | 0.608443315  | 5.375234278 | 3.021201332  | 0.003036052 | 0.01581836  | -2.298304301 |
| RGS10    | 0.678077587  | 5.368390318 | 3.016961825  | 0.00307596  | 0.015979229 | -2.310149264 |
| RHOU     | 0.750352359  | 3.456651518 | 3.007739076  | 0.003164455 | 0.016360334 | -2.335867366 |
| PPBP     | 1.397811592  | 4.451061477 | 3.006358586  | 0.003177901 | 0.016416767 | -2.339711062 |
| RTL8A    | 0.861693684  | 3.934289858 | 3.004673757  | 0.003194383 | 0.016484408 | -2.344400053 |
| CXorf21  | 0.616111634  | 6.084469411 | 3.00349539   | 0.003205958 | 0.016530986 | -2.347678172 |
| LPAR1    | 0.683319141  | 1.597047974 | 3.0030382    | 0.003210459 | 0.016543912 | -2.348949737 |
| PLPPR3   | -1.056131004 | 5.346998307 | -2.999497458 | 0.003245516 | 0.016677511 | -2.358791778 |
| CIITA    | 0.889901418  | 5.634339601 | 2.989427367  | 0.003347157 | 0.017095977 | -2.386728069 |
| LMO4     | 0.656261416  | 4.166863596 | 2.986772982  | 0.003374433 | 0.017180323 | -2.394078238 |
| MEX3A    | -0.655804059 | 1.82568986  | -2.986409319 | 0.003378186 | 0.017191289 | -2.395084803 |
| NPW      | -0.835481441 | 3.642083622 | -2.985515266 | 0.003387428 | 0.017220311 | -2.397558956 |
| LONRF3   | 0.658932467  | 2.665267586 | 2.981558306  | 0.003428615 | 0.017376599 | -2.408501505 |
| CALCRL   | 0.873124701  | 2.206865378 | 2.976319915  | 0.003483848 | 0.017600127 | -2.422968311 |
| SETD7    | 0.588216932  | 3.020349159 | 2.974137859  | 0.003507097 | 0.017703789 | -2.428987945 |
| ALDH2    | 0.738419666  | 2.725193719 | 2.96911351   | 0.003561172 | 0.017916342 | -2.442834006 |
| ZBTB16   | -0.720786654 | 4.115980247 | -2.968115658 | 0.003572003 | 0.017956903 | -2.445581454 |
| LCN2     | 0.797547684  | 1.512563973 | 2.967272346  | 0.003581179 | 0.017993739 | -2.447902773 |
| SUCNR1   | -0.873825809 | 4.773387365 | -2.964438389 | 0.003612177 | 0.01810741  | -2.455699374 |
| AIF1L    | -1.010004667 | 3.062323124 | -2.954544047 | 0.003722346 | 0.018521315 | -2.482869186 |

|          |              |             |              |             |             |              |
|----------|--------------|-------------|--------------|-------------|-------------|--------------|
| KRT72    | 0.647316711  | 1.312842281 | 2.952740346  | 0.00374276  | 0.018603858 | -2.487813614 |
| BPI      | 0.988023148  | 2.310542449 | 2.951758845  | 0.003753911 | 0.018654523 | -2.490503065 |
| HLA-DQA2 | 1.187031181  | 3.206769858 | 2.948261535  | 0.003793895 | 0.018814778 | -2.500079852 |
| CD38     | -0.641413744 | 6.205602214 | -2.944390909 | 0.003838602 | 0.018964002 | -2.510667362 |
| GYG2     | -0.612782543 | 1.3142317   | -2.93703881  | 0.003924859 | 0.019282443 | -2.530744504 |
| WFS1     | 0.635956986  | 1.488093795 | 2.936510519  | 0.003931125 | 0.01930348  | -2.532185476 |
| SNX9     | 0.633858079  | 3.289884185 | 2.935369154  | 0.003944694 | 0.019355459 | -2.535297903 |
| LDLRAD3  | 1.006083708  | 2.518757348 | 2.933994838  | 0.00396109  | 0.019415788 | -2.539044173 |
| ITPR3    | 0.68858947   | 3.122575953 | 2.933540494  | 0.003966524 | 0.019428281 | -2.54028234  |
| TMEM170B | 0.679987226  | 4.776909936 | 2.933139825  | 0.003971322 | 0.019446886 | -2.541374092 |
| CD3D     | 0.800721718  | 4.307404221 | 2.932284791  | 0.003981578 | 0.019482403 | -2.543703477 |
| GADD45B  | 0.612635584  | 4.600848722 | 2.919807775  | 0.00413404  | 0.02004695  | -2.57762734  |
| CD96     | -1.103337954 | 5.686555911 | -2.917909742 | 0.004157696 | 0.020144925 | -2.582776842 |
| CLEC4D   | 0.957845373  | 2.054053618 | 2.916510079  | 0.004175221 | 0.020201344 | -2.586572352 |
| ENG      | 0.606948554  | 5.634579802 | 2.912292513  | 0.004228439 | 0.020392916 | -2.597999633 |
| BLK      | 0.597625172  | 2.240274317 | 2.896017935  | 0.004439679 | 0.021165151 | -2.641959087 |
| AEBP1    | -0.761968985 | 3.86911051  | -2.895188201 | 0.004450703 | 0.021212511 | -2.644194513 |
| IFITM1   | 0.79189792   | 5.395516095 | 2.89308931   | 0.004478703 | 0.021319854 | -2.649846726 |
| PRKCA    | 0.696239939  | 3.400145147 | 2.892257162  | 0.004489849 | 0.02136246  | -2.652086666 |
| TAF4A5   | -0.601433622 | 0.629435339 | -2.889769759 | 0.004523317 | 0.021484927 | -2.658778788 |
| PGGHG    | 0.606956501  | 4.976668131 | 2.888456486  | 0.004541079 | 0.02153524  | -2.662309987 |
| ADAMTSL4 | 0.671002367  | 5.039732256 | 2.888314953  | 0.004542997 | 0.021535652 | -2.662690465 |
| ATP8B4   | -0.606012941 | 6.143161683 | -2.887240461 | 0.004557583 | 0.021578859 | -2.665578445 |
| C2       | 0.743124375  | 1.535116029 | 2.88390753   | 0.004603099 | 0.021747102 | -2.674530586 |
| TP53I11  | 0.678446762  | 3.766295208 | 2.875890532  | 0.004714295 | 0.022143418 | -2.696026821 |
| PALM     | -0.87531948  | 2.882472177 | -2.872153269 | 0.004766967 | 0.022336907 | -2.70602972  |
| LCN6     | 0.743478726  | 0.877994325 | 2.86315369   | 0.004896022 | 0.022853583 | -2.730070491 |
| PANX2    | 0.613871444  | 2.406476544 | 2.862265603  | 0.004908929 | 0.022902844 | -2.732439265 |
| IRS2     | 0.647079313  | 5.226814839 | 2.859500685  | 0.004949313 | 0.023025013 | -2.73980993  |
| ADAMTS10 | 0.814751378  | 3.083585424 | 2.85274596   | 0.005049253 | 0.02342834  | -2.757790207 |
| FCRL1    | 0.668021138  | 3.029152373 | 2.849914997  | 0.005091684 | 0.023585855 | -2.765314777 |
| CD79A    | 0.617522512  | 4.780356134 | 2.844280256  | 0.005177112 | 0.023901923 | -2.780272091 |
| KCTD15   | -0.608097983 | 3.55893941  | -2.843706223 | 0.005185888 | 0.023931085 | -2.781794388 |
| CPXM1    | -0.696649858 | 6.970110228 | -2.836906376 | 0.005290886 | 0.024334825 | -2.799806553 |
| COL23A1  | -1.091889578 | 3.257935805 | -2.833644344 | 0.005341942 | 0.02450594  | -2.808433895 |
| CXCR2    | 0.653686681  | 2.611827913 | 2.830252454  | 0.005395508 | 0.024710892 | -2.817395408 |
| LY6E     | 0.599227977  | 6.509382802 | 2.828475202  | 0.00542377  | 0.024805303 | -2.822087203 |
| MEST     | -0.931783018 | 5.134202781 | -2.81709691  | 0.005607937 | 0.025509688 | -2.85206336  |
| TCL1A    | 0.681306576  | 2.090063177 | 2.814544666  | 0.005650023 | 0.025659146 | -2.858772623 |
| HNRNPLL  | 0.69445088   | 2.904487968 | 2.813447908  | 0.005668196 | 0.025723671 | -2.861654098 |
| GPR153   | -0.764622657 | 2.280817935 | -2.811491579 | 0.005700746 | 0.025852346 | -2.866791433 |
| DPPA4    | 1.006944     | 1.547013272 | 2.806766536  | 0.005780066 | 0.02613385  | -2.879186426 |
| PLCH1    | -0.648718828 | 1.413101817 | -2.805321551 | 0.005804524 | 0.026238336 | -2.882973312 |
| ITGB3    | 0.872866699  | 1.984805458 | 2.802536867  | 0.005851923 | 0.026403531 | -2.890266305 |
| IGLL1    | -1.239598227 | 6.01328752  | -2.791837853 | 0.006037338 | 0.027036488 | -2.918227115 |
| TUBB1    | 0.639094205  | 2.718755031 | 2.771195919  | 0.006410268 | 0.028337987 | -2.971905347 |
| STK32B   | -0.773367741 | 2.871828833 | -2.76329717  | 0.006558434 | 0.028825095 | -2.992352272 |



|          |              |             |              |             |             |              |
|----------|--------------|-------------|--------------|-------------|-------------|--------------|
| GCSAML   | -0.961373144 | 3.751802647 | -2.760605034 | 0.006609641 | 0.029008483 | -2.999309389 |
| PLCG1    | 0.611141489  | 3.462117211 | 2.760173057  | 0.006617891 | 0.029016941 | -3.00042516  |
| SHANK1   | -0.946353588 | 2.854212811 | -2.753619298 | 0.006744217 | 0.02947944  | -3.017334136 |
| GAS2L1   | 0.642661377  | 2.647977163 | 2.747576028  | 0.006862642 | 0.029882975 | -3.032894421 |
| TBC1D4   | 0.595983605  | 2.612872315 | 2.738036285  | 0.007053435 | 0.030557565 | -3.057395682 |
| B4GALT6  | -0.703239024 | 4.68192712  | -2.73622202  | 0.007090261 | 0.030681894 | -3.062046758 |
| CPNE3    | 0.591231775  | 4.862912629 | 2.728556108  | 0.007247798 | 0.031252415 | -3.081668941 |
| AGRN     | -0.66888326  | 3.325018785 | -2.726832485 | 0.007283654 | 0.031372267 | -3.086074103 |
| HRH2     | 0.745800613  | 4.929201733 | 2.722553725  | 0.00737336  | 0.031667531 | -3.096998872 |
| MS4A3    | -1.229352354 | 5.554812898 | -2.719624002 | 0.00743536  | 0.031858942 | -3.104470402 |
| UGT2B28  | -0.602064448 | 1.216189243 | -2.717387088 | 0.007483016 | 0.032025401 | -3.110170274 |
| POU4F1   | -1.044891594 | 0.93443827  | -2.716427135 | 0.007503553 | 0.032070972 | -3.112615048 |
| AK5      | 0.678994405  | 1.976428208 | 2.712492664  | 0.007588258 | 0.032383223 | -3.122627178 |
| SERPINB2 | 0.958080088  | 2.753633584 | 2.702814822  | 0.007800314 | 0.033148701 | -3.147199584 |
| RAB44    | -0.61128365  | 6.146553219 | -2.688076161 | 0.008133592 | 0.034222638 | -3.184471178 |
| CPA3     | -1.273556785 | 6.534279463 | -2.68635658  | 0.008173305 | 0.034345175 | -3.188807865 |
| PACSIN1  | 0.808248813  | 1.375613255 | 2.682299245  | 0.008267702 | 0.034606105 | -3.199030424 |
| MMP2     | -1.061077149 | 3.786392557 | -2.682235752 | 0.008269187 | 0.034606105 | -3.199190286 |
| GSDMC    | -0.614546179 | 1.26450319  | -2.674273582 | 0.008457339 | 0.035279704 | -3.219210648 |
| NFIL3    | 0.604258784  | 5.427649714 | 2.666424131  | 0.00864661  | 0.035907604 | -3.23889553  |
| PPP1R16B | 0.596789615  | 3.699873765 | 2.665624601  | 0.008666102 | 0.035975909 | -3.240897691 |
| EPX      | -0.790194182 | 2.562024296 | -2.661255822 | 0.008773314 | 0.036325254 | -3.251828393 |
| JCHAIN   | 0.783421261  | 6.790014499 | 2.661040989  | 0.008778617 | 0.036339478 | -3.252365491 |
| PEAR1    | 0.854767315  | 2.349792549 | 2.65668729   | 0.008886709 | 0.036677701 | -3.263241723 |
| NECTIN1  | -0.608455394 | 3.983931143 | -2.634376801 | 0.009459727 | 0.03844743  | -3.318726638 |
| SLC41A1  | 0.633456912  | 2.630183601 | 2.631444172  | 0.009537477 | 0.038698772 | -3.325988741 |
| IL1B     | 0.642668653  | 5.152473789 | 2.628651479  | 0.009612053 | 0.038946413 | -3.332897579 |
| SERINC2  | 0.709833677  | 1.985150598 | 2.622876395  | 0.00976794  | 0.039412007 | -3.347163676 |
| ERG      | -0.671550861 | 5.243629013 | -2.621657745 | 0.009801125 | 0.039505881 | -3.35017049  |
| BAHCC1   | -0.753926981 | 5.7857261   | -2.612330368 | 0.010058501 | 0.040293668 | -3.373142694 |
| COBLL1   | 0.667460448  | 1.981388628 | 2.611400438  | 0.010084493 | 0.04036286  | -3.375428969 |
| HNMT     | 0.837076357  | 2.276150172 | 2.607188078  | 0.010202986 | 0.040728225 | -3.385776093 |
| ASS1     | -0.732744901 | 1.255468962 | -2.595505898 | 0.010538191 | 0.041732439 | -3.414393327 |
| ITM2A    | -0.947999318 | 6.526220397 | -2.594524006 | 0.010566812 | 0.041802387 | -3.416793354 |
| BEX2     | 0.748533515  | 1.904992101 | 2.593584703  | 0.010594257 | 0.041886274 | -3.419088516 |
| NMUR1    | 0.63093558   | 1.951157498 | 2.592185929  | 0.010635246 | 0.042005658 | -3.422504999 |
| RHOBTB3  | -0.628186504 | 3.389606775 | -2.584601498 | 0.010859988 | 0.04265954  | -3.441000977 |
| DEFA3    | 0.934548318  | 1.616913272 | 2.582893088  | 0.010911197 | 0.042826118 | -3.445160505 |
| MPO      | -1.441239791 | 10.65714015 | -2.577273405 | 0.011081181 | 0.043414493 | -3.45882549  |
| SPRED1   | 0.6000151    | 1.251202423 | 2.575775886  | 0.011126878 | 0.043550977 | -3.462462378 |
| IGF1R    | -0.675254705 | 3.494910287 | -2.575574251 | 0.011133044 | 0.043556298 | -3.462951924 |
| S100B    | -0.959268491 | 3.067827632 | -2.573012879 | 0.011211635 | 0.043810929 | -3.469167642 |
| KRT17    | -0.737465802 | 1.295251211 | -2.566756578 | 0.0114057   | 0.044376616 | -3.484326471 |
| UNCX     | -0.771673074 | 0.81513349  | -2.561525365 | 0.011570278 | 0.044950609 | -3.496976004 |
| PLXDC2   | 0.650328421  | 4.021922973 | 2.560701545  | 0.011596389 | 0.045016104 | -3.498965953 |
| ADRA2C   | -0.654847955 | 0.935869611 | -2.560361505 | 0.011607182 | 0.045040032 | -3.499787157 |
| LPAR6    | 0.640587646  | 4.094487669 | 2.556083259  | 0.011743749 | 0.045443102 | -3.5101108   |

|         |              |             |              |             |             |              |
|---------|--------------|-------------|--------------|-------------|-------------|--------------|
| ITM2C   | -0.641524706 | 7.346265919 | -2.554391865 | 0.011798137 | 0.04558105  | -3.514187929 |
| SIRPB2  | 0.688689398  | 5.355715365 | 2.553118805  | 0.011839222 | 0.045712552 | -3.517255052 |
| CAVIN2  | 0.863022594  | 3.2196466   | 2.55254098   | 0.011857912 | 0.045766556 | -3.518646725 |
| IRX1    | -0.823479201 | 1.24955302  | -2.547636722 | 0.012017614 | 0.046208806 | -3.530447015 |
| EPB41L2 | 0.745343093  | 3.406046479 | 2.534398616  | 0.01245837  | 0.04750897  | -3.562197314 |
| PLA2G4A | 0.614409066  | 4.231244421 | 2.529517225  | 0.012624514 | 0.04799272  | -3.573867134 |
| DLC1    | -0.668142774 | 2.652653113 | -2.527242488 | 0.012702612 | 0.048242162 | -3.579298343 |
| ARPP21  | -0.679202333 | 0.984070109 | -2.525764697 | 0.012753581 | 0.048379081 | -3.582824379 |
| DYTN    | -0.630629497 | 2.507354925 | -2.516121404 | 0.013090695 | 0.049374636 | -3.605787647 |
| COL2A1  | -0.619495981 | 0.759519545 | -2.512452769 | 0.013221023 | 0.049764238 | -3.614502777 |

|          | Stromal_limma_res |             |             |          |             |             |
|----------|-------------------|-------------|-------------|----------|-------------|-------------|
|          | logFC             | AveExpr     | t           | P. Value | adj. P. Val | B           |
| CPN2     | 0.643942078       | 0.182642479 | 9.64627733  | 6.50E-17 | 1.27E-12    | 27.83614363 |
| PCDH18   | 1.335572043       | 0.4846745   | 9.521486777 | 1.32E-16 | 1.28E-12    | 27.15512695 |
| SMOC2    | 0.836623468       | 0.277971873 | 9.170060321 | 9.55E-16 | 4.33E-12    | 25.24483154 |
| FRZB     | 1.658392646       | 0.575646903 | 9.116435972 | 1.29E-15 | 4.33E-12    | 24.95445385 |
| SEPTIN10 | 1.304085976       | 0.660896788 | 9.110275712 | 1.34E-15 | 4.33E-12    | 24.92111659 |
| YAP1     | 0.759202437       | 0.289602127 | 9.073761076 | 1.64E-15 | 4.56E-12    | 24.72360145 |
| PARVA    | 0.746863134       | 0.285278905 | 8.81297292  | 7.04E-15 | 1.25E-11    | 23.31771176 |
| SNAI2    | 1.579162172       | 0.6572711   | 8.690094892 | 1.39E-14 | 2.26E-11    | 22.6584429  |
| TMEM132C | 0.857376687       | 0.302389472 | 8.67266747  | 1.54E-14 | 2.26E-11    | 22.56511765 |
| GPX8     | 0.803120075       | 0.305287626 | 8.662616049 | 1.62E-14 | 2.26E-11    | 22.51131202 |
| SLC22A3  | 1.599385567       | 0.717680842 | 8.629863187 | 1.95E-14 | 2.53E-11    | 22.33609021 |
| FNDC4    | 0.585734271       | 0.226974678 | 8.609969676 | 2.18E-14 | 2.65E-11    | 22.22974324 |
| C7       | 2.100037769       | 1.00411685  | 8.531918061 | 3.35E-14 | 3.84E-11    | 21.81308954 |
| ID4      | 0.971624399       | 0.354185612 | 8.467710671 | 4.78E-14 | 4.89E-11    | 21.47107118 |
| FM03     | 1.518144003       | 0.719794097 | 8.454843134 | 5.13E-14 | 4.99E-11    | 21.40261039 |
| SVEP1    | 1.114190114       | 0.367460604 | 8.44163131  | 5.52E-14 | 5.11E-11    | 21.33234667 |
| SIX2     | 0.759624527       | 0.322344084 | 8.39251128  | 7.23E-14 | 5.86E-11    | 21.07137379 |
| SPARCL1  | 1.862465069       | 1.152432216 | 8.369070042 | 8.23E-14 | 6.33E-11    | 20.94697761 |
| BMP5     | 1.251954964       | 0.482324564 | 8.364094691 | 8.45E-14 | 6.33E-11    | 20.92058711 |
| BCAR1    | 0.585510439       | 0.27074052  | 8.269203807 | 1.42E-13 | 1.03E-10    | 20.41810479 |
| LAMA4    | 1.099150458       | 0.445250038 | 8.250976023 | 1.57E-13 | 1.09E-10    | 20.32176883 |
| COL1A2   | 2.225972158       | 1.092954969 | 8.231222149 | 1.75E-13 | 1.18E-10    | 20.21743679 |
| ISLR     | 1.448663236       | 0.639371061 | 8.216809967 | 1.90E-13 | 1.23E-10    | 20.14136342 |
| CHL1     | 1.393226107       | 0.656610451 | 8.128390653 | 3.08E-13 | 1.93E-10    | 19.67551606 |
| FM02     | 1.433464964       | 0.67284308  | 8.041982352 | 4.92E-13 | 2.90E-10    | 19.22174583 |
| LGI4     | 0.677020472       | 0.566242625 | 8.005296466 | 6.01E-13 | 3.34E-10    | 19.02954873 |
| COL1A1   | 2.293446337       | 1.218545005 | 7.979234084 | 6.92E-13 | 3.74E-10    | 18.89317757 |
| CDH11    | 1.383570475       | 0.547531165 | 7.919817771 | 9.55E-13 | 4.78E-10    | 18.58281832 |
| SEMA6D   | 0.920711389       | 0.357468223 | 7.914860427 | 9.81E-13 | 4.78E-10    | 18.55695792 |
| FERMT2   | 0.802368419       | 0.471272518 | 7.914435618 | 9.83E-13 | 4.78E-10    | 18.55474211 |
| HTRA1    | 1.379523022       | 0.656712965 | 7.896535985 | 1.08E-12 | 5.14E-10    | 18.46141311 |
| TUSC3    | 0.662226976       | 0.226794085 | 7.876287163 | 1.21E-12 | 5.35E-10    | 18.35591957 |
| PAPPA    | 1.120458936       | 0.364631957 | 7.871066956 | 1.24E-12 | 5.38E-10    | 18.3287376  |

|         |             |             |             |          |          |             |
|---------|-------------|-------------|-------------|----------|----------|-------------|
| ADGRF5  | 0.905793691 | 0.335762486 | 7.834339161 | 1.52E-12 | 6.15E-10 | 18.1376639  |
| TMEM108 | 0.721326638 | 0.313997005 | 7.822040059 | 1.62E-12 | 6.30E-10 | 18.07374594 |
| ABCA8   | 1.028915162 | 0.337041671 | 7.816420643 | 1.67E-12 | 6.37E-10 | 18.04455337 |
| IL10    | 2.152093609 | 1.073275893 | 7.794786611 | 1.88E-12 | 7.02E-10 | 17.93223233 |
| CCDC80  | 1.159058125 | 1.028582526 | 7.788538795 | 1.94E-12 | 7.12E-10 | 17.89981427 |
| COL3A1  | 2.267252709 | 1.117463316 | 7.782986774 | 2.00E-12 | 7.20E-10 | 17.87101396 |
| TENM4   | 0.870491678 | 0.387058    | 7.765460698 | 2.20E-12 | 7.77E-10 | 17.78014629 |
| SLIT3   | 0.623181609 | 0.182873524 | 7.743145118 | 2.48E-12 | 8.61E-10 | 17.66454893 |
| DDR2    | 1.127638402 | 0.691875218 | 7.731429148 | 2.64E-12 | 9.00E-10 | 17.60390511 |
| COL5A3  | 1.208073185 | 0.745708457 | 7.722471549 | 2.77E-12 | 9.05E-10 | 17.55756071 |
| EFEMP1  | 1.385639131 | 0.482218468 | 7.7208509   | 2.79E-12 | 9.05E-10 | 17.54917789 |
| GHR     | 0.832818563 | 0.368487572 | 7.688572854 | 3.32E-12 | 1.06E-09 | 17.38234828 |
| BGN     | 2.493916539 | 1.548048681 | 7.6036644   | 5.23E-12 | 1.61E-09 | 16.94468994 |
| GNG12   | 1.082326316 | 0.500029319 | 7.57307192  | 6.15E-12 | 1.84E-09 | 16.78743387 |
| OSR2    | 0.648758981 | 0.329975508 | 7.455555659 | 1.15E-11 | 3.20E-09 | 16.18555493 |
| LTBP2   | 1.366971176 | 1.296697775 | 7.442505222 | 1.23E-11 | 3.38E-09 | 16.11893456 |
| GEM     | 0.651295674 | 0.347279372 | 7.40507331  | 1.50E-11 | 4.00E-09 | 15.92809961 |
| COL16A1 | 0.813426094 | 0.375795109 | 7.388807853 | 1.64E-11 | 4.30E-09 | 15.84529128 |
| FMOD    | 1.395979138 | 0.677237242 | 7.375037576 | 1.76E-11 | 4.57E-09 | 15.77524148 |
| ADAMTS9 | 0.961528269 | 0.383868599 | 7.372180582 | 1.79E-11 | 4.57E-09 | 15.76071427 |
| NR2F1   | 0.691028156 | 0.355127952 | 7.359876108 | 1.91E-11 | 4.82E-09 | 15.69817379 |
| PDGFRA  | 0.748777473 | 0.372547653 | 7.324121865 | 2.30E-11 | 5.74E-09 | 15.51667778 |
| CDH5    | 1.25972191  | 0.694094219 | 7.307091417 | 2.52E-11 | 6.12E-09 | 15.43035091 |
| ESM1    | 1.429212741 | 0.646185102 | 7.301002535 | 2.60E-11 | 6.25E-09 | 15.39950598 |
| RGL1    | 1.68032545  | 1.362122904 | 7.263233568 | 3.17E-11 | 7.52E-09 | 15.20840725 |
| RND3    | 1.077007315 | 0.299593314 | 7.238425414 | 3.61E-11 | 8.30E-09 | 15.08310395 |
| PLPP3   | 1.662214325 | 1.399651331 | 7.23669142  | 3.64E-11 | 8.30E-09 | 15.07435225 |
| SELENOM | 0.923601601 | 0.836222617 | 7.235440232 | 3.67E-11 | 8.30E-09 | 15.06803786 |
| RGL3    | 0.982620472 | 0.445637836 | 7.231155783 | 3.75E-11 | 8.39E-09 | 15.04641885 |
| HID1    | 1.291031556 | 0.989967612 | 7.221434803 | 3.95E-11 | 8.71E-09 | 14.99738689 |
| NR2F2   | 0.893053142 | 0.366776516 | 7.204987598 | 4.30E-11 | 9.30E-09 | 14.91448982 |
| VCAM1   | 2.408094847 | 1.365706792 | 7.175161913 | 5.03E-11 | 1.08E-08 | 14.76436126 |
| HEY2    | 0.662908844 | 0.214229263 | 7.167278551 | 5.24E-11 | 1.10E-08 | 14.72472316 |
| FZD4    | 0.842069678 | 0.482175763 | 7.163462146 | 5.35E-11 | 1.11E-08 | 14.70554051 |
| FOLR2   | 2.096742241 | 1.528494562 | 7.161562897 | 5.40E-11 | 1.11E-08 | 14.69599577 |
| THY1    | 1.505780345 | 0.732422099 | 7.156241395 | 5.55E-11 | 1.13E-08 | 14.669258   |
| IBSP    | 0.735527104 | 0.160435782 | 7.149212305 | 5.76E-11 | 1.16E-08 | 14.63395318 |
| CP      | 1.549929714 | 1.923620778 | 7.11830415  | 6.77E-11 | 1.32E-08 | 14.47888409 |
| PLEKHS1 | 0.739226108 | 0.353316949 | 7.10737346  | 7.16E-11 | 1.38E-08 | 14.42411145 |
| TJP1    | 0.659102538 | 0.309865308 | 7.092859112 | 7.72E-11 | 1.45E-08 | 14.35143645 |
| ANTXR1  | 0.91796542  | 0.53059076  | 7.092815255 | 7.73E-11 | 1.45E-08 | 14.35121695 |
| APOE    | 2.500260104 | 2.687095697 | 7.077582323 | 8.36E-11 | 1.55E-08 | 14.27501193 |
| TMEM119 | 1.200128527 | 0.890858368 | 7.056834705 | 9.31E-11 | 1.69E-08 | 14.17133129 |
| SLC02B1 | 1.259851554 | 0.535770179 | 7.036885972 | 1.03E-10 | 1.85E-08 | 14.07176591 |
| SOWAHC  | 0.864019223 | 0.334950618 | 7.034434725 | 1.05E-10 | 1.85E-08 | 14.05953995 |
| TNC     | 1.94065133  | 1.756902059 | 7.033427881 | 1.05E-10 | 1.85E-08 | 14.0545187  |
| MXRA5   | 1.285277526 | 0.545730063 | 7.012093259 | 1.17E-10 | 1.99E-08 | 13.94819338 |

|          |             |             |             |          |          |             |
|----------|-------------|-------------|-------------|----------|----------|-------------|
| NGFR     | 1.57913618  | 1.130558933 | 6.997779533 | 1.26E-10 | 2.10E-08 | 13.87693662 |
| MYO6     | 0.828116373 | 0.673634159 | 6.961387753 | 1.53E-10 | 2.48E-08 | 13.696057   |
| ALDH1A3  | 1.083422351 | 0.884376724 | 6.956678512 | 1.56E-10 | 2.50E-08 | 13.67268069 |
| WNT10A   | 0.922256638 | 0.800212416 | 6.956399713 | 1.57E-10 | 2.50E-08 | 13.67129698 |
| DCN      | 1.295158168 | 0.673059049 | 6.94691899  | 1.64E-10 | 2.56E-08 | 13.62425737 |
| LIFR     | 1.358710889 | 0.708662011 | 6.930275455 | 1.79E-10 | 2.77E-08 | 13.5417473  |
| CCL14    | 0.818495804 | 0.38366728  | 6.904514233 | 2.05E-10 | 3.11E-08 | 13.41420975 |
| C1S      | 1.471384834 | 1.477919308 | 6.877153006 | 2.35E-10 | 3.55E-08 | 13.27898345 |
| PARM1    | 1.315163966 | 1.25014906  | 6.873822353 | 2.40E-10 | 3.59E-08 | 13.26253895 |
| COL6A3   | 1.530608727 | 0.830792816 | 6.84349317  | 2.80E-10 | 4.16E-08 | 13.11295958 |
| ANGPTL2  | 1.062401902 | 0.792308605 | 6.829247371 | 3.01E-10 | 4.44E-08 | 13.04280475 |
| HFE      | 1.229491628 | 0.972314187 | 6.801577902 | 3.47E-10 | 5.04E-08 | 12.90673435 |
| MOCS1    | 1.013773198 | 0.526997174 | 6.77805482  | 3.91E-10 | 5.64E-08 | 12.79125403 |
| SEMA3C   | 1.712070584 | 0.784981063 | 6.76278313  | 4.23E-10 | 5.96E-08 | 12.71638054 |
| RHOJ     | 0.613204524 | 0.233903423 | 6.757479703 | 4.34E-10 | 6.04E-08 | 12.69039739 |
| MAOB     | 0.892688546 | 0.322039458 | 6.709544434 | 5.54E-10 | 7.54E-08 | 12.45597844 |
| C1QTNF1  | 1.052211447 | 0.532750166 | 6.694211698 | 5.99E-10 | 8.10E-08 | 12.38116151 |
| CCL4     | 1.602409472 | 2.534537136 | 6.644337098 | 7.71E-10 | 1.03E-07 | 12.13835607 |
| RSP01    | 0.745482893 | 0.402322142 | 6.640269946 | 7.87E-10 | 1.04E-07 | 12.11859398 |
| GPNMB    | 1.260344916 | 0.812348611 | 6.637414484 | 7.99E-10 | 1.05E-07 | 12.10472288 |
| LDB2     | 0.752350278 | 0.386440738 | 6.612803621 | 9.05E-10 | 1.17E-07 | 11.98528814 |
| COL4A1   | 1.464522567 | 0.701871152 | 6.603574544 | 9.48E-10 | 1.21E-07 | 11.94055507 |
| CADPS2   | 0.672070643 | 0.259955297 | 6.594604731 | 9.92E-10 | 1.26E-07 | 11.89710751 |
| MMRN2    | 0.921451246 | 0.559187268 | 6.572224912 | 1.11E-09 | 1.39E-07 | 11.7888298  |
| FABP4    | 2.071535985 | 1.292203332 | 6.569623365 | 1.12E-09 | 1.40E-07 | 11.77625461 |
| CCL8     | 0.724525952 | 0.220248164 | 6.560556005 | 1.18E-09 | 1.46E-07 | 11.73244435 |
| CALD1    | 1.351123511 | 0.993647265 | 6.54752329  | 1.26E-09 | 1.54E-07 | 11.66952657 |
| LBP      | 2.049180055 | 1.065092764 | 6.539507212 | 1.31E-09 | 1.59E-07 | 11.63085787 |
| PODN     | 0.880762938 | 0.562949918 | 6.526213378 | 1.40E-09 | 1.68E-07 | 11.566781   |
| ALPL     | 2.053080596 | 1.565841468 | 6.515439296 | 1.48E-09 | 1.76E-07 | 11.51489645 |
| EPAS1    | 1.840122676 | 1.79317429  | 6.51497502  | 1.48E-09 | 1.76E-07 | 11.5126616  |
| C4B      | 0.627766444 | 0.425229796 | 6.513485234 | 1.49E-09 | 1.76E-07 | 11.50549083 |
| RNASE1   | 2.393821842 | 2.32543554  | 6.444547977 | 2.10E-09 | 2.44E-07 | 11.17456626 |
| SDC1     | 2.01308465  | 1.978761126 | 6.432088373 | 2.24E-09 | 2.58E-07 | 11.11494306 |
| AFAP1    | 1.251329358 | 0.934900069 | 6.397727227 | 2.66E-09 | 2.97E-07 | 10.95081507 |
| DNASE1L3 | 1.666833723 | 1.096796035 | 6.397577905 | 2.66E-09 | 2.97E-07 | 10.9501028  |
| LYVE1    | 1.625876381 | 0.900147666 | 6.393153589 | 2.72E-09 | 3.01E-07 | 10.92900233 |
| COL15A1  | 0.903992063 | 0.378881087 | 6.392836686 | 2.72E-09 | 3.01E-07 | 10.92749125 |
| TF       | 1.487531044 | 1.097532538 | 6.387026778 | 2.80E-09 | 3.06E-07 | 10.89979456 |
| AMPD1    | 1.441611966 | 1.023999641 | 6.36900191  | 3.06E-09 | 3.29E-07 | 10.81394881 |
| FLT1     | 0.730564519 | 0.488615589 | 6.351768775 | 3.34E-09 | 3.57E-07 | 10.7319895  |
| ERRFI1   | 0.94095434  | 1.247912271 | 6.344507798 | 3.46E-09 | 3.66E-07 | 10.69749094 |
| C1R      | 1.281920769 | 1.838622387 | 6.335244725 | 3.62E-09 | 3.81E-07 | 10.65350933 |
| LEPR     | 1.594949144 | 2.726024389 | 6.32965181  | 3.72E-09 | 3.90E-07 | 10.62696983 |
| NLG4X    | 0.653310514 | 0.212714687 | 6.325555372 | 3.80E-09 | 3.95E-07 | 10.60753906 |
| VEGFC    | 1.219980301 | 0.759935028 | 6.304738309 | 4.21E-09 | 4.36E-07 | 10.50889708 |
| ADGRL4   | 1.148844499 | 0.562676554 | 6.287018539 | 4.60E-09 | 4.73E-07 | 10.42506425 |

|          |             |             |             |          |          |             |
|----------|-------------|-------------|-------------|----------|----------|-------------|
| WASF3    | 1.123089316 | 0.631888357 | 6.203580193 | 6.92E-09 | 6.90E-07 | 10.03197391 |
| SDC3     | 1.948515961 | 1.507383271 | 6.201944826 | 6.98E-09 | 6.90E-07 | 10.02429708 |
| KDR      | 1.003325782 | 0.535929512 | 6.18696759  | 7.51E-09 | 7.38E-07 | 9.954040109 |
| IL33     | 1.017230084 | 0.481749391 | 6.154071306 | 8.82E-09 | 8.54E-07 | 9.800043854 |
| FSTL1    | 2.09838694  | 1.760206873 | 6.152059417 | 8.91E-09 | 8.58E-07 | 9.790639898 |
| PLEKHH2  | 0.767695957 | 0.464737562 | 6.124855082 | 1.02E-08 | 9.70E-07 | 9.663643579 |
| AOC3     | 0.856256302 | 0.904160937 | 6.119427527 | 1.04E-08 | 9.91E-07 | 9.638342683 |
| COL12A1  | 0.619405269 | 0.240811926 | 6.087976257 | 1.22E-08 | 1.14E-06 | 9.491969297 |
| KCNN3    | 0.611980715 | 0.41123592  | 6.082531725 | 1.25E-08 | 1.16E-06 | 9.466672109 |
| C4A      | 0.61591248  | 0.581528227 | 6.034673934 | 1.57E-08 | 1.44E-06 | 9.244839696 |
| PRSS23   | 0.782117306 | 0.562815527 | 6.031942702 | 1.59E-08 | 1.46E-06 | 9.232208721 |
| CXCL12   | 3.721332779 | 3.402228626 | 6.019070679 | 1.70E-08 | 1.53E-06 | 9.172722555 |
| ABCC9    | 0.625517389 | 0.299937093 | 6.014828409 | 1.73E-08 | 1.55E-06 | 9.153132861 |
| NOS3     | 0.781348628 | 0.763057473 | 6.011488171 | 1.76E-08 | 1.56E-06 | 9.137713872 |
| RGS16    | 1.162617258 | 0.977605669 | 5.998462243 | 1.87E-08 | 1.64E-06 | 9.077629639 |
| TMEM63C  | 1.362029689 | 0.859533921 | 5.984281952 | 2.01E-08 | 1.74E-06 | 9.01230275  |
| P3H2     | 0.833246395 | 0.531741113 | 5.969609197 | 2.15E-08 | 1.85E-06 | 8.944797525 |
| MGP      | 1.383364874 | 1.006901944 | 5.960397347 | 2.25E-08 | 1.90E-06 | 8.902463536 |
| BHLHA15  | 1.170198688 | 1.542743018 | 5.946838495 | 2.40E-08 | 2.01E-06 | 8.840218848 |
| RELN     | 0.766769624 | 0.198536747 | 5.92042204  | 2.73E-08 | 2.27E-06 | 8.719176832 |
| TEAD1    | 0.692570233 | 0.337785631 | 5.912179263 | 2.83E-08 | 2.34E-06 | 8.681469858 |
| XCR1     | 0.664543039 | 0.313482147 | 5.899831575 | 3.01E-08 | 2.47E-06 | 8.6250402   |
| RAB3IL1  | 1.76443867  | 1.627798367 | 5.892927451 | 3.11E-08 | 2.53E-06 | 8.593516995 |
| CCL13    | 0.654055036 | 0.283206476 | 5.890309078 | 3.15E-08 | 2.54E-06 | 8.58156735  |
| PRDM1    | 1.23185691  | 2.877429293 | 5.861481431 | 3.61E-08 | 2.86E-06 | 8.450203937 |
| ITGA8    | 0.717189757 | 0.459768242 | 5.834786184 | 4.10E-08 | 3.23E-06 | 8.328885076 |
| CHST3    | 0.636000869 | 0.435312361 | 5.825235256 | 4.29E-08 | 3.35E-06 | 8.285557015 |
| GFRA1    | 0.729065404 | 0.326410443 | 5.817125147 | 4.46E-08 | 3.47E-06 | 8.248797245 |
| COL5A2   | 0.769645235 | 0.739511939 | 5.815087891 | 4.50E-08 | 3.49E-06 | 8.239567828 |
| ARHGAP29 | 0.66793154  | 0.3002548   | 5.810048204 | 4.61E-08 | 3.56E-06 | 8.216744433 |
| FBLIM1   | 0.89225191  | 0.614798378 | 5.777508498 | 5.37E-08 | 4.10E-06 | 8.069655628 |
| CPNE5    | 1.225095709 | 2.266424582 | 5.770395885 | 5.56E-08 | 4.21E-06 | 8.037568225 |
| LGMN     | 1.759083861 | 2.308126431 | 5.760396597 | 5.83E-08 | 4.39E-06 | 7.992496843 |
| TMEM37   | 1.207256734 | 0.907372382 | 5.754600168 | 5.99E-08 | 4.50E-06 | 7.966390479 |
| NAV2     | 0.680647802 | 0.570869618 | 5.753705528 | 6.01E-08 | 4.50E-06 | 7.962362497 |
| SPIC     | 1.049098078 | 0.469379369 | 5.751164497 | 6.08E-08 | 4.54E-06 | 7.950923879 |
| OSMR     | 1.075586545 | 1.520120762 | 5.737259269 | 6.50E-08 | 4.77E-06 | 7.888380731 |
| LUM      | 2.007154093 | 1.35221265  | 5.736063207 | 6.53E-08 | 4.78E-06 | 7.883005189 |
| CCL2     | 1.058583354 | 0.569383025 | 5.73521067  | 6.56E-08 | 4.78E-06 | 7.879173979 |
| COL6A2   | 2.046040875 | 2.251493109 | 5.710155519 | 7.38E-08 | 5.34E-06 | 7.766727568 |
| LOXL2    | 0.67867119  | 1.2896569   | 5.704181029 | 7.59E-08 | 5.47E-06 | 7.739956955 |
| IGFBP3   | 1.488168449 | 1.298448783 | 5.690330289 | 8.10E-08 | 5.81E-06 | 7.677957698 |
| POU2AF1  | 1.493106271 | 2.303866004 | 5.685696978 | 8.27E-08 | 5.90E-06 | 7.657237699 |
| NFATC4   | 0.821152908 | 0.364763416 | 5.684174786 | 8.33E-08 | 5.92E-06 | 7.650432683 |
| KCNJ8    | 0.807074403 | 0.348571111 | 5.666047248 | 9.07E-08 | 6.37E-06 | 7.569475618 |
| SYNP02   | 0.784440318 | 0.648056998 | 5.659074117 | 9.37E-08 | 6.56E-06 | 7.53837458  |
| AMOTL2   | 0.960579388 | 0.572079347 | 5.649817833 | 9.78E-08 | 6.80E-06 | 7.49712549  |

|            |              |             |              |          |          |             |
|------------|--------------|-------------|--------------|----------|----------|-------------|
| FCRL5      | 1.389575042  | 1.78082989  | 5.640590555  | 1.02E-07 | 7.07E-06 | 7.456045591 |
| MAGI1      | 0.725992278  | 0.206253122 | 5.638289165  | 1.03E-07 | 7.12E-06 | 7.445806013 |
| SASH1      | 1.39644264   | 0.656065402 | 5.61923695   | 1.13E-07 | 7.73E-06 | 7.36113265  |
| GP5        | 1.095260169  | 0.758955067 | 5.595415478  | 1.26E-07 | 8.54E-06 | 7.255504572 |
| ADGRL2     | 0.944217424  | 0.563819617 | 5.586401411  | 1.31E-07 | 8.84E-06 | 7.21560503  |
| KIAA1671   | 0.635257155  | 0.522341734 | 5.576941561  | 1.37E-07 | 9.09E-06 | 7.173773905 |
| RAI14      | 1.161435468  | 0.773819156 | 5.576670203  | 1.37E-07 | 9.09E-06 | 7.172574601 |
| NCKAP1     | 0.714966021  | 0.376417362 | 5.55937928   | 1.49E-07 | 9.79E-06 | 7.096227478 |
| CHRD1      | 2.424992178  | 1.525630212 | 5.553576545  | 1.53E-07 | 1.00E-05 | 7.070637924 |
| TSPAN18    | 1.305766526  | 1.621534566 | 5.551935747  | 1.54E-07 | 1.01E-05 | 7.063405081 |
| JAKMIP1    | 0.880213042  | 0.811686591 | 5.542573022  | 1.61E-07 | 1.05E-05 | 7.022157789 |
| APLNR      | 1.163455389  | 0.667856159 | 5.538388122  | 1.64E-07 | 1.06E-05 | 7.003734946 |
| PDGFB      | 0.948848166  | 0.851479557 | 5.52761785   | 1.72E-07 | 1.11E-05 | 6.956360728 |
| PLA2G2D    | 0.681125224  | 0.547743002 | 5.522562731  | 1.76E-07 | 1.13E-05 | 6.934144569 |
| NFIB       | 0.837017154  | 0.373359739 | 5.519332872  | 1.79E-07 | 1.14E-05 | 6.91995651  |
| RAMP2      | 1.01085864   | 0.680074242 | 5.515823254  | 1.82E-07 | 1.15E-05 | 6.904545269 |
| RGS5       | 0.827103377  | 0.810717242 | 5.493382174  | 2.02E-07 | 1.27E-05 | 6.806144706 |
| PLVAP      | 1.73820372   | 1.713290284 | 5.493125972  | 2.02E-07 | 1.27E-05 | 6.805022713 |
| RAB30      | 0.933187356  | 1.297631862 | 5.487207609  | 2.08E-07 | 1.29E-05 | 6.779113265 |
| IL34       | 0.616579489  | 0.526184167 | 5.485687833  | 2.09E-07 | 1.30E-05 | 6.772462742 |
| PKDCC      | 0.879585583  | 0.412476063 | 5.472660387  | 2.22E-07 | 1.37E-05 | 6.715501144 |
| HINT1      | -0.862062342 | 7.935519505 | -5.463835835 | 2.31E-07 | 1.42E-05 | 6.676963691 |
| OLFML3     | 1.700665242  | 1.618080521 | 5.447555573  | 2.49E-07 | 1.52E-05 | 6.605967155 |
| DTHD1      | 0.901111167  | 0.831532206 | 5.433347165  | 2.65E-07 | 1.62E-05 | 6.544112679 |
| BMP2       | 0.909066345  | 0.48499962  | 5.419375127  | 2.83E-07 | 1.72E-05 | 6.483384765 |
| CMKLR1     | 1.722046126  | 1.841052602 | 5.408915481  | 2.97E-07 | 1.79E-05 | 6.437986597 |
| CTTN       | 1.313635738  | 1.209487262 | 5.406103706  | 3.01E-07 | 1.81E-05 | 6.425791901 |
| AC136428.1 | 1.515693226  | 1.216063762 | 5.388455166  | 3.26E-07 | 1.93E-05 | 6.349340222 |
| IGFBP4     | 2.155185931  | 2.945744634 | 5.38448638   | 3.32E-07 | 1.96E-05 | 6.332169324 |
| SLAMF7     | 1.735228934  | 3.272258668 | 5.382886588  | 3.34E-07 | 1.96E-05 | 6.32525008  |
| ADAM19     | 1.542625404  | 2.795049451 | 5.371919206  | 3.51E-07 | 2.05E-05 | 6.277849778 |
| SMOC1      | 0.773868832  | 0.390218734 | 5.368691637  | 3.56E-07 | 2.07E-05 | 6.263911962 |
| GPX3       | 0.988078759  | 2.448188882 | 5.367630519  | 3.58E-07 | 2.07E-05 | 6.259330814 |
| COL4A2     | 1.257937944  | 0.774088125 | 5.363873014  | 3.64E-07 | 2.10E-05 | 6.243113159 |
| LAMB1      | 0.818951717  | 1.7827362   | 5.361714108  | 3.68E-07 | 2.11E-05 | 6.233798391 |
| C1QB       | 3.010611093  | 2.760989761 | 5.356128246  | 3.77E-07 | 2.16E-05 | 6.209708676 |
| KITLG      | 0.94724439   | 0.875399976 | 5.353121947  | 3.82E-07 | 2.18E-05 | 6.196750165 |
| ZDBF2      | 0.746414465  | 0.595248411 | 5.351735415  | 3.85E-07 | 2.19E-05 | 6.190775126 |
| IGLL5      | 2.326544209  | 4.040439586 | 5.346383292  | 3.94E-07 | 2.24E-05 | 6.167720122 |
| EDNRB      | 0.689678653  | 0.431572797 | 5.344072227  | 3.98E-07 | 2.25E-05 | 6.157769377 |
| WFS1       | 1.604126223  | 1.488093795 | 5.317750426  | 4.48E-07 | 2.53E-05 | 6.044627076 |
| CYP1B1     | 2.326237339  | 2.426508509 | 5.316660429  | 4.51E-07 | 2.53E-05 | 6.039949411 |
| TRPC6      | 0.731704126  | 0.255680417 | 5.315523219  | 4.53E-07 | 2.54E-05 | 6.035069777 |
| RAMP3      | 0.89736895   | 0.556083084 | 5.310887357  | 4.62E-07 | 2.58E-05 | 6.015184691 |
| IRF4       | 1.574181481  | 2.709615396 | 5.307450759  | 4.70E-07 | 2.61E-05 | 6.000450818 |
| TEK        | 1.035247521  | 0.847739254 | 5.300365621  | 4.85E-07 | 2.68E-05 | 5.970093476 |
| MAF        | 1.316785736  | 2.050948606 | 5.295161366  | 4.96E-07 | 2.72E-05 | 5.947811449 |

|           |             |             |             |          |          |             |
|-----------|-------------|-------------|-------------|----------|----------|-------------|
| ZBP1      | 1.095356953 | 1.63652197  | 5.295110009 | 4.96E-07 | 2.72E-05 | 5.947591633 |
| NUGGC     | 0.867394355 | 1.046724421 | 5.290120053 | 5.08E-07 | 2.78E-05 | 5.926240308 |
| LPL       | 2.040319686 | 1.774079386 | 5.279700288 | 5.32E-07 | 2.88E-05 | 5.881696845 |
| TIMP4     | 1.404110027 | 1.045780077 | 5.271602366 | 5.52E-07 | 2.97E-05 | 5.847117646 |
| LIMCH1    | 0.786388562 | 0.376930563 | 5.270978387 | 5.53E-07 | 2.97E-05 | 5.844454574 |
| EMCN      | 0.870756803 | 0.417472472 | 5.268661695 | 5.59E-07 | 2.99E-05 | 5.834568962 |
| PRG4      | 0.624440426 | 0.981185974 | 5.258116743 | 5.86E-07 | 3.12E-05 | 5.789607389 |
| LRRC32    | 1.236132437 | 0.835118831 | 5.255511408 | 5.93E-07 | 3.15E-05 | 5.778507623 |
| FBN1      | 1.452548644 | 1.61653078  | 5.25162555  | 6.03E-07 | 3.20E-05 | 5.761958854 |
| UTS2R     | 0.687551759 | 0.503846622 | 5.242510912 | 6.28E-07 | 3.31E-05 | 5.723172938 |
| FCRL6     | 1.505141487 | 2.398626527 | 5.229661035 | 6.66E-07 | 3.49E-05 | 5.668565674 |
| SGK1      | 1.985284737 | 2.824965197 | 5.227467889 | 6.72E-07 | 3.52E-05 | 5.659254204 |
| TIMP3     | 0.979498248 | 0.405186002 | 5.223065021 | 6.85E-07 | 3.58E-05 | 5.640568458 |
| EOMES     | 1.235211351 | 1.868455784 | 5.21043839  | 7.25E-07 | 3.76E-05 | 5.587037308 |
| SSTR3     | 0.675447479 | 0.448094788 | 5.198580953 | 7.64E-07 | 3.95E-05 | 5.536843235 |
| ABCC3     | 1.487017018 | 1.29277221  | 5.177927024 | 8.38E-07 | 4.29E-05 | 5.449589002 |
| HES1      | 1.113500446 | 0.846707699 | 5.171947342 | 8.60E-07 | 4.38E-05 | 5.424369338 |
| PDGFRB    | 1.473106708 | 2.024940228 | 5.163694855 | 8.92E-07 | 4.51E-05 | 5.38959505  |
| KCNK1     | 0.953723362 | 0.236004612 | 5.1587709   | 9.12E-07 | 4.59E-05 | 5.368863699 |
| VGLL3     | 1.00585393  | 0.465859032 | 5.158408758 | 9.13E-07 | 4.59E-05 | 5.367339477 |
| A2M       | 1.517908928 | 2.659366425 | 5.15066704  | 9.45E-07 | 4.74E-05 | 5.33477199  |
| KLRD1     | 1.205540789 | 1.783325612 | 5.145684247 | 9.66E-07 | 4.83E-05 | 5.31382746  |
| FPR3      | 1.328092303 | 1.263081689 | 5.138976125 | 9.95E-07 | 4.97E-05 | 5.285651604 |
| CCL4L2    | 1.194002994 | 1.251793978 | 5.133744919 | 1.02E-06 | 5.07E-05 | 5.263695825 |
| CXCL14    | 1.063622003 | 0.592105126 | 5.13129714  | 1.03E-06 | 5.11E-05 | 5.253427324 |
| TBC1D12   | 1.417552284 | 1.032193487 | 5.116240297 | 1.10E-06 | 5.41E-05 | 5.190333877 |
| B3GAT1    | 0.65761713  | 0.473349374 | 5.115988499 | 1.10E-06 | 5.41E-05 | 5.189279787 |
| CXCL9     | 1.321795109 | 0.617808402 | 5.110545452 | 1.13E-06 | 5.52E-05 | 5.16650213  |
| DAAM2     | 1.433121946 | 0.644770166 | 5.098719739 | 1.19E-06 | 5.78E-05 | 5.117069593 |
| ACKR1     | 1.311660528 | 0.955173505 | 5.096575352 | 1.20E-06 | 5.81E-05 | 5.108113921 |
| FHL2      | 1.22290196  | 1.298910317 | 5.09553812  | 1.21E-06 | 5.82E-05 | 5.103782982 |
| C1QC      | 2.829120763 | 2.725427506 | 5.085372675 | 1.26E-06 | 6.04E-05 | 5.061368102 |
| THBD      | 1.449365718 | 2.282469083 | 5.072136989 | 1.34E-06 | 6.35E-05 | 5.006226409 |
| COL6A1    | 2.050087358 | 2.127747657 | 5.063929971 | 1.38E-06 | 6.57E-05 | 4.972082484 |
| FCN2      | 0.776696193 | 0.575716081 | 5.057304439 | 1.43E-06 | 6.72E-05 | 4.944544729 |
| KRT79     | 0.770289912 | 0.177334233 | 5.057171658 | 1.43E-06 | 6.72E-05 | 4.943993093 |
| SLC16A6   | 1.303472545 | 1.403485118 | 5.036242624 | 1.56E-06 | 7.31E-05 | 4.857163985 |
| ARSG      | 0.979027005 | 1.722179836 | 5.034319836 | 1.58E-06 | 7.34E-05 | 4.849198822 |
| EDNRA     | 0.629887314 | 0.276549136 | 4.999674961 | 1.83E-06 | 8.49E-05 | 4.706029239 |
| KIR2DL1   | 0.6220127   | 0.470441145 | 4.99752712  | 1.85E-06 | 8.55E-05 | 4.697175023 |
| NR4A1     | 2.050809935 | 3.42797839  | 4.995651198 | 1.86E-06 | 8.59E-05 | 4.689443841 |
| LILRB5    | 0.981770603 | 0.613079755 | 4.995382741 | 1.87E-06 | 8.59E-05 | 4.688337614 |
| HERPUD1   | 1.025197753 | 5.507596729 | 4.993551562 | 1.88E-06 | 8.64E-05 | 4.680792975 |
| SYNPO     | 0.78479203  | 1.06282451  | 4.986736708 | 1.94E-06 | 8.85E-05 | 4.652731352 |
| TNFRSF9   | 0.623369756 | 0.712320872 | 4.975133587 | 2.04E-06 | 9.29E-05 | 4.605012086 |
| LAMP3     | 0.632656791 | 0.551883352 | 4.964264572 | 2.14E-06 | 9.67E-05 | 4.560379591 |
| TNFRSF13B | 0.7488496   | 0.825573505 | 4.958940653 | 2.19E-06 | 9.87E-05 | 4.538541396 |

|         |             |             |             |          |             |             |
|---------|-------------|-------------|-------------|----------|-------------|-------------|
| JCHAIN  | 2.04545971  | 6.790014499 | 4.956776744 | 2.21E-06 | 9.94E-05    | 4.529669759 |
| APOD    | 1.350247156 | 0.727408022 | 4.95411285  | 2.23E-06 | 0.000100221 | 4.518751853 |
| MYO10   | 0.678612115 | 0.531133913 | 4.953764363 | 2.24E-06 | 0.000100221 | 4.517323878 |
| ZNF208  | 0.700213312 | 0.367523791 | 4.944126328 | 2.33E-06 | 0.000104238 | 4.477857518 |
| XCL1    | 0.794512074 | 0.738978695 | 4.94289953  | 2.34E-06 | 0.000104363 | 4.472837674 |
| RBP7    | 1.47523137  | 1.493807902 | 4.940102495 | 2.37E-06 | 0.000105336 | 4.461395836 |
| PCOLCE  | 0.968083444 | 1.938033183 | 4.936717688 | 2.41E-06 | 0.000106641 | 4.447555442 |
| C1QA    | 2.882103464 | 3.16539599  | 4.93479495  | 2.43E-06 | 0.000107283 | 4.439696268 |
| XCL2    | 1.195019536 | 1.585166974 | 4.924725046 | 2.53E-06 | 0.000111783 | 4.398569408 |
| CSF1    | 1.532791503 | 2.56938114  | 4.923921711 | 2.54E-06 | 0.000111917 | 4.395290923 |
| IGF2    | 1.582010174 | 1.30768404  | 4.908763443 | 2.71E-06 | 0.000119182 | 4.333496568 |
| ACVRL1  | 1.110785919 | 0.99021796  | 4.898310943 | 2.84E-06 | 0.00012437  | 4.290961078 |
| SGMS1   | 0.987692985 | 3.413588929 | 4.877355985 | 3.10E-06 | 0.000134534 | 4.205872551 |
| TGFBR3  | 1.102270056 | 1.659459846 | 4.874124105 | 3.15E-06 | 0.000136103 | 4.192771476 |
| CLMP    | 0.616465364 | 1.15343062  | 4.873427568 | 3.16E-06 | 0.000136126 | 4.189948704 |
| EPOR    | 1.50826897  | 3.347868837 | 4.872497783 | 3.17E-06 | 0.000136145 | 4.186181098 |
| ZCCHC24 | 1.288726338 | 2.596728912 | 4.869007769 | 3.22E-06 | 0.000137887 | 4.172043502 |
| IKZF3   | 1.307695188 | 3.261758073 | 4.868163537 | 3.23E-06 | 0.000138081 | 4.168624667 |
| BMP6    | 1.166695142 | 1.449880384 | 4.865895499 | 3.26E-06 | 0.00013872  | 4.159441932 |
| SLC7A2  | 0.926302471 | 0.640904331 | 4.85018662  | 3.49E-06 | 0.000147376 | 4.095920815 |
| DPF3    | 0.692255796 | 0.576403537 | 4.849530182 | 3.50E-06 | 0.000147376 | 4.093269471 |
| PCSK1N  | 0.790590899 | 0.433689814 | 4.849319306 | 3.50E-06 | 0.000147376 | 4.092417801 |
| ID3     | 1.074024645 | 1.102483459 | 4.844714221 | 3.57E-06 | 0.000149649 | 4.073825404 |
| PMEPA1  | 1.09508894  | 1.408604303 | 4.81410388  | 4.06E-06 | 0.000167921 | 3.950548681 |
| LTA     | 0.865884056 | 1.141035509 | 4.814094499 | 4.06E-06 | 0.000167921 | 3.950510984 |
| ACP5    | 1.221946735 | 2.946741112 | 4.811743724 | 4.11E-06 | 0.000169245 | 3.941065966 |
| ZFP36L1 | 1.742284715 | 5.058603032 | 4.804617502 | 4.23E-06 | 0.000174067 | 3.912453445 |
| TIMD4   | 1.608282874 | 1.49371738  | 4.80164517  | 4.28E-06 | 0.000175901 | 3.900527865 |
| RIPOR3  | 1.273124528 | 3.471729503 | 4.796614229 | 4.38E-06 | 0.000179311 | 3.880354353 |
| SPAG4   | 0.824312408 | 2.554653447 | 4.793913755 | 4.43E-06 | 0.000180991 | 3.869531777 |
| NRP2    | 0.861287436 | 0.588136816 | 4.789211177 | 4.52E-06 | 0.000184241 | 3.850695506 |
| ENPEP   | 1.085895851 | 0.689498072 | 4.776666684 | 4.76E-06 | 0.000192655 | 3.800510859 |
| EXT1    | 1.080347061 | 1.35437553  | 4.77488581  | 4.80E-06 | 0.000193707 | 3.793393802 |
| TGFBI   | 2.324272174 | 2.420146301 | 4.7729752   | 4.84E-06 | 0.000194871 | 3.785760316 |
| SFRP5   | 0.961156818 | 1.054732127 | 4.764384276 | 5.02E-06 | 0.000201644 | 3.751463075 |
| CPEB4   | 0.908847809 | 4.09860651  | 4.745797232 | 5.42E-06 | 0.00021716  | 3.677405604 |
| MAN1C1  | 0.973367924 | 1.702334219 | 4.743539856 | 5.48E-06 | 0.000218781 | 3.668425122 |
| FASLG   | 0.8890162   | 0.948402207 | 4.733369557 | 5.71E-06 | 0.000226471 | 3.628001714 |
| IGFBP5  | 1.767804256 | 1.640421088 | 4.724940856 | 5.92E-06 | 0.000234147 | 3.594546424 |
| TSKU    | 0.878008382 | 0.615679974 | 4.722737311 | 5.97E-06 | 0.000235841 | 3.585806959 |
| CHST2   | 1.413354254 | 3.517207301 | 4.721481291 | 6.01E-06 | 0.000236606 | 3.580826738 |
| CEMIP2  | 1.058239286 | 3.526161179 | 4.716079405 | 6.14E-06 | 0.000241533 | 3.559418385 |
| PLOD2   | 0.86571294  | 0.366421244 | 4.708985413 | 6.33E-06 | 0.000247813 | 3.531330049 |
| S1PR5   | 1.19827417  | 1.684389511 | 4.706077317 | 6.41E-06 | 0.000250342 | 3.51982413  |
| SEMA4B  | 0.974857506 | 3.76542624  | 4.699901138 | 6.57E-06 | 0.000256376 | 3.495404523 |
| SLC9A9  | 1.538730161 | 2.325691058 | 4.684063388 | 7.02E-06 | 0.000272808 | 3.432887495 |
| PAQR9   | 0.966614577 | 0.527092038 | 4.676171879 | 7.26E-06 | 0.000280533 | 3.40179237  |



|         |             |             |             |          |             |             |
|---------|-------------|-------------|-------------|----------|-------------|-------------|
| EYA1    | 0.783342562 | 0.440540662 | 4.671973117 | 7.39E-06 | 0.000284631 | 3.385262914 |
| ATP1B2  | 1.70463263  | 1.438374284 | 4.670216843 | 7.44E-06 | 0.000286153 | 3.378352013 |
| BCL2L11 | 1.172540554 | 3.444237968 | 4.668735239 | 7.49E-06 | 0.000287356 | 3.372523355 |
| IPP     | 0.615065283 | 1.951437223 | 4.664637322 | 7.62E-06 | 0.000291148 | 3.356408864 |
| CH25H   | 0.687156485 | 0.228098834 | 4.654579252 | 7.94E-06 | 0.0003018   | 3.31689921  |
| GFRA2   | 0.65059231  | 0.631832247 | 4.62799909  | 8.87E-06 | 0.000334349 | 3.212778524 |
| IFNLR1  | 0.922673771 | 0.9621571   | 4.626064231 | 8.94E-06 | 0.000336385 | 3.205215725 |
| DMPK    | 1.122429477 | 1.748038919 | 4.620271069 | 9.15E-06 | 0.000343877 | 3.182585353 |
| MYO1E   | 1.139911472 | 2.069297516 | 4.610477349 | 9.53E-06 | 0.000356698 | 3.144373034 |
| STEAP4  | 1.043400893 | 0.855301692 | 4.608640029 | 9.60E-06 | 0.000358724 | 3.137210754 |
| CD27    | 1.081055805 | 3.435622954 | 4.596369576 | 1.01E-05 | 0.000374469 | 3.089429889 |
| TGM2    | 1.43295204  | 1.819322983 | 4.593570596 | 1.02E-05 | 0.000378091 | 3.078543431 |
| EPHA3   | 0.690359652 | 0.139724498 | 4.590019988 | 1.04E-05 | 0.000382932 | 3.064740369 |
| CFI     | 1.023082326 | 0.619610532 | 4.588344565 | 1.04E-05 | 0.000384851 | 3.05822977  |
| DMWD    | 1.135518819 | 2.063897884 | 4.587745524 | 1.05E-05 | 0.000385072 | 3.055902339 |
| CLCN5   | 1.244871386 | 2.431983634 | 4.587239541 | 1.05E-05 | 0.000385147 | 3.053936635 |
| WLS     | 1.091074439 | 0.764931041 | 4.584882503 | 1.06E-05 | 0.000388168 | 3.044781762 |
| BTNL9   | 0.971761793 | 0.73033023  | 4.577929471 | 1.09E-05 | 0.000398674 | 3.017795352 |
| IRS1    | 0.741808779 | 0.796951141 | 4.570861141 | 1.12E-05 | 0.000408631 | 2.990391443 |
| MYBL1   | 0.936327254 | 2.218749981 | 4.570555452 | 1.12E-05 | 0.000408631 | 2.989206969 |
| F2RL3   | 0.891726806 | 0.781842833 | 4.568867931 | 1.13E-05 | 0.000410704 | 2.982669243 |
| CHPF    | 1.2213204   | 2.275239853 | 4.567545468 | 1.14E-05 | 0.00041217  | 2.977547016 |
| TMEM63B | 0.998445947 | 3.68528116  | 4.551742709 | 1.21E-05 | 0.000438122 | 2.916421191 |
| ACSBG1  | 0.892614369 | 0.846390654 | 4.548837907 | 1.23E-05 | 0.000442542 | 2.905201806 |
| CD5L    | 1.496205391 | 0.974171084 | 4.530565698 | 1.32E-05 | 0.00047162  | 2.834745959 |
| ANG     | 0.889492533 | 1.097202738 | 4.520148883 | 1.38E-05 | 0.000488514 | 2.794671061 |
| TTC16   | 0.746241507 | 0.895363162 | 4.516602815 | 1.40E-05 | 0.000494725 | 2.781044019 |
| HTRA4   | 0.795139139 | 0.884852385 | 4.510891912 | 1.43E-05 | 0.000505376 | 2.759114037 |
| SNTB2   | 1.028840616 | 2.000947153 | 4.510482369 | 1.44E-05 | 0.000505376 | 2.757542152 |
| STUM    | 0.726948435 | 0.397810437 | 4.497560243 | 1.51E-05 | 0.00052882  | 2.707998142 |
| HPSE2   | 0.706103325 | 0.141371653 | 4.491870211 | 1.55E-05 | 0.000540213 | 2.686214888 |
| CCL18   | 1.195437636 | 0.717770431 | 4.47431435  | 1.66E-05 | 0.000577995 | 2.619131366 |
| RNF182  | 0.946807961 | 0.366551197 | 4.468050704 | 1.71E-05 | 0.000589677 | 2.595243179 |
| RGS1    | 1.704893275 | 3.331255547 | 4.459732842 | 1.76E-05 | 0.000608764 | 2.563558227 |
| COL18A1 | 1.06705044  | 2.546381136 | 4.443917718 | 1.88E-05 | 0.00064774  | 2.503432706 |
| ITPRIP  | 0.922755024 | 4.467103504 | 4.439337961 | 1.92E-05 | 0.00065864  | 2.486050564 |
| CD40LG  | 1.158152682 | 2.298772453 | 4.434869979 | 1.95E-05 | 0.000669416 | 2.469105252 |
| THBS1   | 2.419303724 | 3.197779175 | 4.434187694 | 1.96E-05 | 0.000670076 | 2.466518707 |
| IPCEF1  | 1.251934205 | 2.515343029 | 4.433041274 | 1.96E-05 | 0.000671992 | 2.462173279 |
| NRN1    | 0.623419339 | 0.435189597 | 4.404649413 | 2.20E-05 | 0.000750525 | 2.35481799  |
| CMTM5   | 1.285734808 | 0.886689899 | 4.403114589 | 2.22E-05 | 0.000753835 | 2.349028901 |
| RCN3    | 1.52953789  | 3.033534293 | 4.402263266 | 2.22E-05 | 0.000754455 | 2.345818501 |
| CLCN4   | 1.179770295 | 1.147412359 | 4.402038205 | 2.23E-05 | 0.000754455 | 2.344969853 |
| TPM1    | 1.04454683  | 2.042599097 | 4.393823202 | 2.30E-05 | 0.000778328 | 2.314015019 |
| KIR3DL1 | 0.618468333 | 0.526490258 | 4.392480103 | 2.31E-05 | 0.000781163 | 2.308958146 |
| MTHFR   | 0.748154263 | 4.352752926 | 4.39153123  | 2.32E-05 | 0.000782775 | 2.305386246 |
| SRPX    | 0.8857123   | 0.663801088 | 4.390630408 | 2.33E-05 | 0.000784242 | 2.301995754 |

|          |              |             |              |          |             |             |
|----------|--------------|-------------|--------------|----------|-------------|-------------|
| SIK1B    | 1.336357626  | 1.931211902 | 4.384095633  | 2.39E-05 | 0.000800842 | 2.277415616 |
| UBASH3A  | 1.226976128  | 2.18818968  | 4.383606269  | 2.40E-05 | 0.000801031 | 2.275575986 |
| DUSP5    | 1.228366651  | 3.618618852 | 4.376458662  | 2.47E-05 | 0.000821401 | 2.248723752 |
| SPRED1   | 1.451352669  | 1.251202423 | 4.372663241  | 2.50E-05 | 0.000832509 | 2.234478168 |
| CD200R1  | 1.336093347  | 2.099388365 | 4.370837592  | 2.52E-05 | 0.000837162 | 2.227629088 |
| NMU      | 1.58580128   | 1.054976457 | 4.34605933   | 2.78E-05 | 0.000917672 | 2.13487996  |
| PROS1    | 1.250543019  | 1.033598994 | 4.339356411  | 2.86E-05 | 0.00094083  | 2.109856769 |
| CHST15   | 2.117132155  | 3.220297497 | 4.335839086  | 2.90E-05 | 0.00095244  | 2.096737396 |
| WNT5B    | 0.739726516  | 0.867034989 | 4.33035893   | 2.96E-05 | 0.000970085 | 2.076312501 |
| SLAMF8   | 0.808188659  | 1.099477988 | 4.327373821  | 3.00E-05 | 0.000979977 | 2.065194857 |
| EPHB2    | 0.894158462  | 0.60080451  | 4.324045798  | 3.04E-05 | 0.000989653 | 2.052806776 |
| WIP11    | 1.041076572  | 3.212956555 | 4.318999072  | 3.10E-05 | 0.001007932 | 2.034034553 |
| CDH1     | 1.350647237  | 1.219128317 | 4.317979919  | 3.11E-05 | 0.001010314 | 2.030245602 |
| AGAP1    | 0.996383922  | 0.900972901 | 4.316827904  | 3.12E-05 | 0.001013237 | 2.025963501 |
| PPARD    | 1.105554587  | 3.356654163 | 4.314636415  | 3.15E-05 | 0.00101866  | 2.017819963 |
| ESYT2    | -0.723225558 | 7.043807759 | -4.310439691 | 3.20E-05 | 0.001033981 | 2.002233572 |
| JAG2     | 0.591447683  | 0.659173656 | 4.307548153  | 3.24E-05 | 0.001040682 | 1.991501123 |
| FCAR     | 2.252162954  | 3.726637299 | 4.304579214  | 3.28E-05 | 0.001047767 | 1.980486956 |
| TBC1D9   | 1.48529109   | 2.592882436 | 4.291785725  | 3.45E-05 | 0.001094797 | 1.933090308 |
| TNS2     | 0.670312149  | 1.968686036 | 4.287429326  | 3.51E-05 | 0.001111193 | 1.916974926 |
| ZNF703   | 1.393093113  | 1.678454142 | 4.286651199  | 3.52E-05 | 0.001113528 | 1.914097727 |
| RGS2     | 2.082639935  | 5.67184092  | 4.284566806  | 3.55E-05 | 0.001119062 | 1.906392407 |
| CLEC1A   | 0.615517253  | 0.519701502 | 4.282988291  | 3.57E-05 | 0.001124213 | 1.900559013 |
| CAMLG    | -0.656389539 | 5.144950235 | -4.279570547 | 3.62E-05 | 0.001135753 | 1.887934247 |
| JUNB     | 1.273249278  | 8.415425677 | 4.279139552  | 3.62E-05 | 0.001135848 | 1.88634273  |
| NRP1     | 1.503488462  | 1.411776292 | 4.277795052  | 3.64E-05 | 0.001140032 | 1.88137873  |
| AMIGO2   | 1.029355644  | 1.630772868 | 4.271015795  | 3.74E-05 | 0.001165188 | 1.856366921 |
| DKK1     | 0.810980471  | 0.232641982 | 4.267939595  | 3.79E-05 | 0.001175585 | 1.845027172 |
| CPAMD8   | 0.895175001  | 0.830138972 | 4.261581649  | 3.88E-05 | 0.001199539 | 1.821609327 |
| SUPT3H   | -0.648238901 | 3.282671391 | -4.257528831 | 3.95E-05 | 0.001214892 | 1.806695451 |
| FCRLA    | 1.22708308   | 1.939993212 | 4.254176396  | 4.00E-05 | 0.001225139 | 1.794366924 |
| C16orf46 | -0.639218433 | 1.966510153 | -4.249341495 | 4.07E-05 | 0.001246589 | 1.776599461 |
| PAPSS2   | 1.060132081  | 2.609208898 | 4.247032504  | 4.11E-05 | 0.001253961 | 1.768119637 |
| GZMK     | 1.267816097  | 2.677336443 | 4.238273509  | 4.25E-05 | 0.001289563 | 1.735983453 |
| FN1      | 1.383828225  | 2.25340817  | 4.234154681  | 4.32E-05 | 0.001306196 | 1.720888949 |
| DEPP1    | 1.240519282  | 3.176148014 | 4.23379855   | 4.33E-05 | 0.001306196 | 1.719584335 |
| PLEKHH3  | 1.06137763   | 1.844181121 | 4.233022562  | 4.34E-05 | 0.001308131 | 1.716741937 |
| CCN2     | 1.63275679   | 1.397555668 | 4.232450061  | 4.35E-05 | 0.001309031 | 1.714645156 |
| SLC18B1  | 1.222371406  | 2.622138592 | 4.229998044  | 4.39E-05 | 0.001317693 | 1.705667056 |
| TNFAIP3  | 1.092438029  | 5.355255476 | 4.229969423  | 4.39E-05 | 0.001317693 | 1.705562281 |
| ABHD5    | 0.820657787  | 4.180501553 | 4.224361534  | 4.49E-05 | 0.001342694 | 1.68504371  |
| OLFML2B  | 1.520355879  | 2.357517418 | 4.220924406  | 4.55E-05 | 0.001356634 | 1.672477798 |
| ATP8B4   | -1.275229518 | 6.143161683 | -4.21856688  | 4.59E-05 | 0.00136497  | 1.663863288 |
| NIBAN2   | 1.755439908  | 3.846634564 | 4.214070322  | 4.68E-05 | 0.001382745 | 1.647442697 |
| ZNF831   | 0.876227985  | 1.468303994 | 4.209439691  | 4.76E-05 | 0.001405747 | 1.630546278 |
| IL2RB    | 1.422654113  | 3.794522532 | 4.207654254  | 4.79E-05 | 0.001412926 | 1.624035246 |
| KLRC4    | 1.10974579   | 1.573667014 | 4.207350332  | 4.80E-05 | 0.001412926 | 1.622927127 |

|             |              |             |              |          |             |             |
|-------------|--------------|-------------|--------------|----------|-------------|-------------|
| KLHL14      | 0.601603497  | 0.778907661 | 4.200743456  | 4.92E-05 | 0.001447482 | 1.598852965 |
| SIGLEC1     | 2.017959947  | 1.859803923 | 4.198350032  | 4.97E-05 | 0.001458794 | 1.590138837 |
| ZNF560      | 0.846293513  | 0.289160619 | 4.196806431  | 5.00E-05 | 0.001465352 | 1.584520785 |
| ZNF532      | 1.438610493  | 1.594009767 | 4.196335589  | 5.01E-05 | 0.001465825 | 1.58280743  |
| CHAC1       | 0.864321474  | 1.010758812 | 4.1959369    | 5.02E-05 | 0.00146589  | 1.581356748 |
| ABCA6       | 0.82490923   | 0.693274695 | 4.191634081  | 5.10E-05 | 0.001488159 | 1.565706995 |
| LDOC1       | 1.514746223  | 1.469651518 | 4.189322548  | 5.15E-05 | 0.001497242 | 1.557304742 |
| FAM83D      | 1.027069101  | 3.147827305 | 4.188296621  | 5.17E-05 | 0.001500965 | 1.553576694 |
| IFI27       | 1.146572568  | 1.185830068 | 4.186398466  | 5.21E-05 | 0.001507547 | 1.546680934 |
| ESR2        | 0.671601994  | 0.701018642 | 4.185659532  | 5.22E-05 | 0.001508078 | 1.54399712  |
| GZMM        | 1.086346112  | 2.590080326 | 4.185540677  | 5.22E-05 | 0.001508078 | 1.543565468 |
| KLRC4-KLRF1 | 0.65226849   | 0.760224882 | 4.18174014   | 5.30E-05 | 0.001521413 | 1.529767832 |
| NR4A2       | 1.666174278  | 5.150946496 | 4.173868801  | 5.46E-05 | 0.001563854 | 1.501221537 |
| BICDL1      | 0.847791955  | 1.671430122 | 4.171992895  | 5.50E-05 | 0.00156962  | 1.494424357 |
| CLEC4G      | 1.224761321  | 1.395207483 | 4.171287749  | 5.52E-05 | 0.00156962  | 1.491869923 |
| GOLGA8N     | -0.933564416 | 3.312459848 | -4.169737194 | 5.55E-05 | 0.001575136 | 1.486254089 |
| RNF157      | 0.908136394  | 1.53649929  | 4.169238039  | 5.56E-05 | 0.00157588  | 1.484446576 |
| SYTL3       | 1.172947831  | 3.348075545 | 4.168642654  | 5.58E-05 | 0.001577214 | 1.482290816 |
| FZD1        | 0.963614885  | 2.104285752 | 4.167026896  | 5.61E-05 | 0.001584787 | 1.476441676 |
| AGTR1       | 0.678737255  | 0.453612577 | 4.161522744  | 5.73E-05 | 0.001614143 | 1.456529222 |
| CD99        | -0.927659488 | 7.75317878  | -4.159858781 | 5.77E-05 | 0.001621956 | 1.450513405 |
| FHDC1       | 1.263948319  | 1.725395289 | 4.15952245   | 5.78E-05 | 0.001621956 | 1.44929767  |
| ADGRD1      | 0.72831802   | 0.602957029 | 4.151869976  | 5.95E-05 | 0.001665722 | 1.421656463 |
| SIT1        | 1.147987423  | 2.751298247 | 4.142661886  | 6.16E-05 | 0.001715967 | 1.388447524 |
| NLRP7       | 0.640858451  | 0.633707826 | 4.139417148  | 6.24E-05 | 0.001730094 | 1.376758741 |
| SIRPG       | 1.112872235  | 2.172632281 | 4.137991     | 6.28E-05 | 0.001737133 | 1.37162342  |
| MYL4        | 1.70979952   | 2.105493138 | 4.121974268  | 6.67E-05 | 0.001836871 | 1.314042343 |
| CXCL16      | 1.739607873  | 2.879244845 | 4.119024555  | 6.75E-05 | 0.001855137 | 1.303456511 |
| GYPE        | 1.476164281  | 1.92628174  | 4.11654926   | 6.81E-05 | 0.001870177 | 1.294577713 |
| HSH2D       | -1.285389556 | 7.758139136 | -4.115108218 | 6.85E-05 | 0.00187524  | 1.289410622 |
| PKLR        | 1.767654491  | 1.711637667 | 4.114723558  | 6.86E-05 | 0.001875367 | 1.288031594 |
| SCAMP5      | 1.132727924  | 2.693461791 | 4.112304364  | 6.93E-05 | 0.00188752  | 1.279360899 |
| PDZD4       | 0.941209959  | 1.396856331 | 4.105274087  | 7.11E-05 | 0.001926162 | 1.254185608 |
| AVPI1       | 0.828430213  | 2.492739682 | 4.10494318   | 7.12E-05 | 0.001926162 | 1.253001447 |
| APOC1       | 1.419485032  | 1.499128387 | 4.104821028  | 7.13E-05 | 0.001926162 | 1.252564339 |
| SH3BP5      | 1.183025632  | 2.022147657 | 4.103803038  | 7.15E-05 | 0.001930992 | 1.248921973 |
| SELENBP1    | 1.977621687  | 2.552277197 | 4.096620226  | 7.35E-05 | 0.001971055 | 1.223241496 |
| EPHX2       | 0.871991524  | 1.082499962 | 4.090962163  | 7.51E-05 | 0.002008554 | 1.203036636 |
| ETV6        | -0.667905483 | 7.28047334  | -4.088940932 | 7.57E-05 | 0.002021118 | 1.19582403  |
| THRB        | 0.870688433  | 0.46112433  | 4.085400781  | 7.68E-05 | 0.002043187 | 1.183197859 |
| WWTR1       | 0.650089918  | 0.652974389 | 4.080216181  | 7.83E-05 | 0.002078263 | 1.164721774 |
| PI4K2A      | 1.113305217  | 2.731147188 | 4.079087225  | 7.86E-05 | 0.002084373 | 1.160700957 |
| TINAGL1     | 0.917697514  | 0.681518321 | 4.078434377  | 7.88E-05 | 0.002086718 | 1.158376206 |
| MRVI1       | 0.93484158   | 1.621305751 | 4.076286365  | 7.95E-05 | 0.002100992 | 1.150729282 |
| NFIA        | 1.682778899  | 1.693403135 | 4.070969729  | 8.11E-05 | 0.00214101  | 1.131815347 |
| PLCH2       | 0.71770502   | 1.036084385 | 4.069647203  | 8.15E-05 | 0.002148888 | 1.1271134   |
| ANKRD9      | 0.976915232  | 2.048454513 | 4.064857139  | 8.30E-05 | 0.002182448 | 1.11009322  |

|          |               |              |               |              |              |              |
|----------|---------------|--------------|---------------|--------------|--------------|--------------|
| SLC44A2  | 1. 190423084  | 5. 139382441 | 4. 063704179  | 8. 34E-05    | 0. 002189069 | 1. 10599879  |
| GLI3     | 0. 682625233  | 0. 399168269 | 4. 060705091  | 8. 43E-05    | 0. 002205212 | 1. 095352514 |
| GBP1     | 1. 63084408   | 2. 531349265 | 4. 056235121  | 8. 58E-05    | 0. 002236922 | 1. 079496056 |
| IL21R    | 0. 877389974  | 1. 63030608  | 4. 055632334  | 8. 59E-05    | 0. 002239041 | 1. 077358796 |
| PTGDR    | 1. 077720285  | 1. 661772557 | 4. 054882027  | 8. 62E-05    | 0. 00224242  | 1. 07469883  |
| ARHGEF12 | 1. 1617955    | 1. 968928645 | 4. 038421232  | 9. 17E-05    | 0. 002364542 | 1. 016437854 |
| FAM20A   | 0. 837455785  | 1. 408481832 | 4. 038420123  | 9. 17E-05    | 0. 002364542 | 1. 016433935 |
| TBX21    | 1. 14051222   | 2. 167369119 | 4. 036527986  | 9. 24E-05    | 0. 002378371 | 1. 009748647 |
| TNXB     | 1. 060329655  | 1. 348647482 | 4. 034964012  | 9. 29E-05    | 0. 002389313 | 1. 00422465  |
| SLC41A2  | 0. 727768878  | 0. 935695887 | 4. 031733171  | 9. 41E-05    | 0. 002412288 | 0. 992818457 |
| IL10RA   | 1. 620665743  | 4. 86945179  | 4. 031183608  | 9. 43E-05    | 0. 00241412  | 0. 990878977 |
| NNMT     | 1. 146806499  | 1. 293469789 | 4. 029265064  | 9. 50E-05    | 0. 00242848  | 0. 984109781 |
| ARL4C    | 1. 143252639  | 4. 152206861 | 4. 027523084  | 9. 56E-05    | 0. 002441297 | 0. 977965707 |
| VPS37C   | 0. 687285283  | 3. 836060615 | 4. 02547625   | 9. 63E-05    | 0. 002457005 | 0. 970749016 |
| SPTB     | 1. 595201323  | 2. 040056068 | 4. 024139761  | 9. 68E-05    | 0. 002462971 | 0. 966038376 |
| REM2     | 0. 62649874   | 1. 368418908 | 4. 022289831  | 9. 75E-05    | 0. 002473751 | 0. 959520035 |
| SLC6A8   | 1. 188843162  | 2. 017847632 | 4. 021829929  | 9. 77E-05    | 0. 002474819 | 0. 957899901 |
| EGR2     | 1. 750194415  | 2. 422666244 | 4. 021183251  | 9. 79E-05    | 0. 002477636 | 0. 955622038 |
| COL6A6   | 0. 6803196    | 0. 394804933 | 4. 016209453  | 9. 98E-05    | 0. 002521245 | 0. 938111766 |
| ASAP3    | 0. 592385959  | 0. 551420379 | 4. 015282265  | 0. 000100111 | 0. 002525645 | 0. 934849451 |
| CR1L     | 1. 086383491  | 1. 065000665 | 4. 007792     | 0. 000102974 | 0. 002585638 | 0. 908516278 |
| PCED1B   | 1. 078638017  | 2. 975299748 | 4. 004273012  | 0. 000104346 | 0. 002616712 | 0. 896157877 |
| IL6ST    | 1. 168978738  | 4. 461585045 | 4. 003672576  | 0. 000104582 | 0. 002619251 | 0. 894050031 |
| LRP1     | 2. 362757712  | 4. 014806711 | 4. 002930183  | 0. 000104874 | 0. 002623195 | 0. 891444185 |
| GASK1B   | 1. 966844658  | 3. 242688766 | 3. 999081399  | 0. 000106402 | 0. 002650741 | 0. 877940699 |
| TLCD4    | 1. 417968339  | 1. 475888425 | 3. 999018348  | 0. 000106427 | 0. 002650741 | 0. 877719567 |
| PMM1     | 0. 83843342   | 2. 032967349 | 3. 998785705  | 0. 00010652  | 0. 002650741 | 0. 876903671 |
| HK1      | 0. 974944109  | 5. 685478198 | 3. 998284898  | 0. 000106721 | 0. 002651253 | 0. 875147427 |
| LILRB1   | 1. 783134975  | 3. 486813013 | 3. 997714986  | 0. 000106949 | 0. 002651253 | 0. 87314905  |
| TMPRSS13 | 0. 648641518  | 0. 928636035 | 3. 99446453   | 0. 000108263 | 0. 002680395 | 0. 861755663 |
| HHEX     | -0. 618870596 | 6. 542910424 | -3. 989483983 | 0. 000110305 | 0. 002721647 | 0. 844311958 |
| CKAP4    | 1. 685487415  | 3. 842491992 | 3. 989041011  | 0. 000110488 | 0. 002721647 | 0. 842761324 |
| HESX1    | -0. 992606691 | 2. 939117006 | -3. 988625614 | 0. 00011066  | 0. 002722444 | 0. 84130734  |
| DGAT2    | 0. 993550738  | 1. 544983241 | 3. 987047533  | 0. 000111317 | 0. 00273175  | 0. 835784766 |
| CD274    | 0. 760028451  | 1. 082477355 | 3. 984661688  | 0. 000112317 | 0. 002749298 | 0. 827438599 |
| RHCE     | 1. 433971981  | 2. 023492114 | 3. 98365315   | 0. 000112742 | 0. 002754462 | 0. 823911697 |
| SLC22A17 | 0. 956754965  | 0. 984681716 | 3. 983330986  | 0. 000112879 | 0. 002754462 | 0. 822785221 |
| TIGIT    | 0. 723179709  | 1. 446929476 | 3. 981303919  | 0. 000113739 | 0. 002770164 | 0. 815699018 |
| FLT3     | -1. 285952913 | 7. 803361834 | -3. 980905622 | 0. 000113909 | 0. 002770831 | 0. 814306987 |
| CTLA4    | 0. 911635588  | 1. 387833039 | 3. 966082613  | 0. 000120403 | 0. 002922157 | 0. 762578078 |
| EFNB2    | 0. 721324422  | 0. 744489947 | 3. 965760251  | 0. 000120548 | 0. 002922157 | 0. 761454777 |
| CD8A     | 1. 194217614  | 2. 931047869 | 3. 965687672  | 0. 00012058  | 0. 002922157 | 0. 761201878 |
| GZMH     | 1. 476729646  | 3. 070309772 | 3. 965254072  | 0. 000120776 | 0. 002923253 | 0. 759691089 |
| HMOX1    | 1. 948844374  | 3. 843200019 | 3. 962243464  | 0. 000122141 | 0. 002952628 | 0. 749204801 |
| ADM      | 1. 236450857  | 1. 610964733 | 3. 960731231  | 0. 000122832 | 0. 002965658 | 0. 743939863 |
| GALM     | 1. 022321784  | 2. 890048393 | 3. 956192014  | 0. 00012493  | 0. 002999601 | 0. 72814568  |
| SEC14L4  | 1. 235998294  | 1. 136095445 | 3. 955769016  | 0. 000125127 | 0. 002999601 | 0. 72667458  |

|          |              |             |              |             |             |             |
|----------|--------------|-------------|--------------|-------------|-------------|-------------|
| MFAP3L   | 0.96735813   | 0.957259331 | 3.955692433  | 0.000125163 | 0.002999601 | 0.726408254 |
| ERN1     | 0.755710185  | 3.873807039 | 3.954307356  | 0.000125811 | 0.003011422 | 0.72159217  |
| CCL3     | 1.249576448  | 2.613314957 | 3.953852538  | 0.000126025 | 0.003012261 | 0.720010998 |
| ABCB6    | 0.792357446  | 1.585093324 | 3.953573558  | 0.000126156 | 0.003012261 | 0.719041193 |
| BLVRB    | 1.326495283  | 5.750857815 | 3.953217879  | 0.000126323 | 0.00301256  | 0.717804844 |
| CA3      | 0.978379744  | 1.276381452 | 3.951721213  | 0.00012703  | 0.003025702 | 0.712603346 |
| ISG20    | 1.039315559  | 2.95057698  | 3.949746456  | 0.000127968 | 0.003040456 | 0.705742643 |
| KRT13    | 0.692359264  | 0.369812104 | 3.9475161    | 0.000129035 | 0.003051062 | 0.697997156 |
| CA1      | 2.297076119  | 4.596043375 | 3.947064019  | 0.000129253 | 0.003052493 | 0.696427602 |
| TMEM158  | 0.873657198  | 0.898758032 | 3.942329744  | 0.00013155  | 0.003102447 | 0.679999387 |
| TREML1   | 1.282123439  | 1.807884525 | 3.942050938  | 0.000131687 | 0.003102447 | 0.679032393 |
| TCTN2    | -0.61574535  | 2.961237598 | -3.934179504 | 0.000135597 | 0.003171687 | 0.65175363  |
| CD248    | 1.165187388  | 1.54086522  | 3.934166393  | 0.000135603 | 0.003171687 | 0.651708231 |
| IFNG     | 0.882285148  | 1.1570379   | 3.93218629   | 0.000136604 | 0.003187438 | 0.644852829 |
| TUBA4A   | 1.438588205  | 4.333136835 | 3.931291796  | 0.000137059 | 0.003192671 | 0.641756845 |
| TUBAL3   | 0.856562096  | 0.460073724 | 3.931099482  | 0.000137157 | 0.003192671 | 0.641091288 |
| TIAM1    | 1.212723152  | 1.645129149 | 3.930292335  | 0.000137568 | 0.003197626 | 0.638298207 |
| PCSK5    | 0.627097819  | 0.840097274 | 3.930038123  | 0.000137698 | 0.003197626 | 0.637418613 |
| SNPH     | 0.784544876  | 1.274188826 | 3.928664661  | 0.000138402 | 0.003210138 | 0.632667104 |
| COL14A1  | 1.172149333  | 1.121359659 | 3.928086606  | 0.000138699 | 0.003212479 | 0.630667707 |
| HPSE     | 1.439752598  | 2.930659831 | 3.927120171  | 0.000139198 | 0.00321327  | 0.627325474 |
| PEAR1    | 1.825492444  | 2.349792549 | 3.925752475  | 0.000139906 | 0.003225789 | 0.622596659 |
| GLDN     | 0.927161045  | 0.700933439 | 3.922276396  | 0.000141721 | 0.003256065 | 0.610583896 |
| ACVR2A   | 0.747696612  | 1.582562417 | 3.920813927  | 0.000142491 | 0.003268065 | 0.605532327 |
| ARHGAP6  | 1.003839475  | 0.844017316 | 3.920554152  | 0.000142628 | 0.003268065 | 0.604635184 |
| CDC25B   | 0.698835333  | 5.135693147 | 3.920012788  | 0.000142915 | 0.003268065 | 0.602765712 |
| MSC      | 0.820903704  | 0.715029366 | 3.918938472  | 0.000143485 | 0.003277249 | 0.599056409 |
| TMCC3    | 0.903486236  | 1.22545433  | 3.917852376  | 0.000144063 | 0.003286604 | 0.595307246 |
| RPL22L1  | -0.675698361 | 5.150983224 | -3.915024473 | 0.00014558  | 0.003305762 | 0.585549242 |
| GNAZ     | 0.790617065  | 0.798851892 | 3.915019697  | 0.000145583 | 0.003305762 | 0.585532767 |
| CAMK2D   | 1.192035646  | 2.243508408 | 3.906580879  | 0.0001502   | 0.003394755 | 0.556446505 |
| FTH1     | 0.952339907  | 7.943376372 | 3.905419957  | 0.000150846 | 0.003401453 | 0.552448979 |
| LY6G6E   | 1.039301474  | 0.793315993 | 3.902638413  | 0.000152404 | 0.003427323 | 0.542874784 |
| FAM167B  | 0.705099616  | 0.960267166 | 3.902274069  | 0.000152609 | 0.003427323 | 0.541621093 |
| CHRFAM7A | -0.685751095 | 1.433893149 | -3.901093919 | 0.000153276 | 0.003436349 | 0.537560879 |
| EPHA2    | 0.865512862  | 0.656056372 | 3.898506346  | 0.000154748 | 0.00345739  | 0.528661909 |
| IQSEC1   | 1.109620065  | 5.009006179 | 3.893811237  | 0.000157452 | 0.003512045 | 0.512526713 |
| RBMS3    | 0.686511699  | 0.466551716 | 3.893143247  | 0.00015784  | 0.003512045 | 0.510232341 |
| C20orf27 | 0.963522679  | 5.496546352 | 3.893013897  | 0.000157916 | 0.003512045 | 0.509788091 |
| SLC41A1  | 1.35391623   | 2.630183601 | 3.889624676  | 0.000159901 | 0.003548098 | 0.498152065 |
| Z82206.1 | 0.97712204   | 1.868475977 | 3.88868523   | 0.000160456 | 0.003556349 | 0.494928127 |
| PECR     | 1.043863259  | 1.414107153 | 3.887723981  | 0.000161025 | 0.003562107 | 0.491629998 |
| TMEM38A  | 0.946240242  | 1.364118067 | 3.887628747  | 0.000161082 | 0.003562107 | 0.49130328  |
| IFITM10  | 0.882938577  | 1.337152899 | 3.884048159  | 0.00016322  | 0.003605301 | 0.479023852 |
| ARHGAP42 | 0.640150221  | 0.531828889 | 3.883203425  | 0.000163729 | 0.00360834  | 0.47612818  |
| KCNA3    | 1.468332627  | 3.645045155 | 3.880007298  | 0.000165666 | 0.003646909 | 0.46517663  |
| GLT1D1   | 1.557666794  | 1.684444456 | 3.876471623  | 0.000167835 | 0.00368631  | 0.453069879 |

|          |              |             |              |             |             |             |
|----------|--------------|-------------|--------------|-------------|-------------|-------------|
| NOTCH4   | 0.628910308  | 1.193754163 | 3.874999135  | 0.000168746 | 0.003702143 | 0.448030395 |
| HSPA12B  | 0.786881598  | 2.04697203  | 3.859296008  | 0.00017876  | 0.003891132 | 0.394381369 |
| EML4     | 0.658503734  | 4.571928355 | 3.857990751  | 0.000179617 | 0.003905426 | 0.389929749 |
| LILRA5   | 2.429455093  | 3.447420747 | 3.855901149  | 0.000180998 | 0.003931053 | 0.382805569 |
| NEDD4L   | 0.933834884  | 1.131980216 | 3.855453007  | 0.000181296 | 0.003933123 | 0.381278095 |
| SOX6     | 0.627086779  | 0.889212662 | 3.851097631  | 0.00018421  | 0.003987468 | 0.366440253 |
| TUBB2A   | 1.211133865  | 1.842000711 | 3.84791999   | 0.000186365 | 0.004016239 | 0.355623061 |
| ZMYND15  | 0.853806262  | 0.843572233 | 3.846831471  | 0.000187109 | 0.004027803 | 0.351919188 |
| RTN1     | 1.079097358  | 0.898680262 | 3.84644239   | 0.000187375 | 0.004029082 | 0.350595478 |
| ART4     | 0.831761889  | 0.691602422 | 3.84313164   | 0.000189657 | 0.004073652 | 0.339336082 |
| SLFN5    | 1.126404582  | 2.91429314  | 3.84062448   | 0.000191403 | 0.00410211  | 0.330814678 |
| ITSN1    | 0.803946273  | 1.979791592 | 3.84046501   | 0.000191515 | 0.00410211  | 0.330272817 |
| IMMP2L   | -0.614980651 | 2.555962881 | -3.84032214  | 0.000191614 | 0.00410211  | 0.329787374 |
| MAPK13   | 0.722502932  | 2.955988617 | 3.836249387  | 0.000194486 | 0.004147958 | 0.315955029 |
| VIPR1    | 1.131965597  | 2.077591009 | 3.834863089  | 0.000195473 | 0.004161815 | 0.311249373 |
| PTGS2    | 1.620103238  | 3.796980922 | 3.831582552  | 0.000197827 | 0.004202736 | 0.300119266 |
| PPP1R3B  | 0.736281371  | 2.746489398 | 3.830848811  | 0.000198357 | 0.004209404 | 0.297630887 |
| RASD1    | 1.581429896  | 2.341395821 | 3.824625997  | 0.000202908 | 0.004291939 | 0.276542231 |
| CLIC3    | 1.025357478  | 1.698721265 | 3.824049827  | 0.000203334 | 0.004293806 | 0.274591008 |
| SOCS3    | 1.552112741  | 5.304589533 | 3.82365049   | 0.00020363  | 0.004293806 | 0.27323877  |
| SIGLEC11 | 1.011988399  | 0.919149087 | 3.823612945  | 0.000203658 | 0.004293806 | 0.273111643 |
| ABCG2    | 0.78327392   | 0.828349488 | 3.822741039  | 0.000204306 | 0.004299705 | 0.270159606 |
| NOTCH3   | 1.396178792  | 1.962223653 | 3.82264174   | 0.00020438  | 0.004299705 | 0.26982344  |
| TSPAN14  | 0.883237035  | 4.480868472 | 3.822195923  | 0.000204712 | 0.004300256 | 0.268314262 |
| C11orf96 | 0.727068053  | 1.111018393 | 3.821675223  | 0.0002051   | 0.004300256 | 0.266551766 |
| GRAP2    | 1.230104447  | 2.724727125 | 3.821421616  | 0.00020529  | 0.004300256 | 0.265693414 |
| CD163    | 2.557231903  | 3.301821017 | 3.819824971  | 0.000206486 | 0.004316033 | 0.26029047  |
| CD40     | 1.13142722   | 2.520841476 | 3.815880078  | 0.000209472 | 0.004355045 | 0.246948876 |
| FMN1     | 0.908920817  | 0.923432447 | 3.81345356   | 0.000211328 | 0.004388957 | 0.238747846 |
| FCRL3    | 1.053128028  | 2.253015056 | 3.811197335  | 0.000213069 | 0.004420384 | 0.231126078 |
| PTK2     | 1.526932836  | 1.83990499  | 3.809550066  | 0.000214348 | 0.004437461 | 0.225563688 |
| RBM38    | 1.122010742  | 5.400029529 | 3.807694469  | 0.000215798 | 0.004462726 | 0.219300112 |
| SPATA24  | -0.709873397 | 3.325065352 | -3.793542184 | 0.000227165 | 0.004672974 | 0.171608775 |
| FOXO1    | 1.321069476  | 3.636399279 | 3.791893927  | 0.000228525 | 0.004690838 | 0.166063543 |
| PRSS57   | -1.763755928 | 8.24163735  | -3.791244969 | 0.000229063 | 0.004690838 | 0.163880778 |
| CD226    | 0.924865557  | 1.700815825 | 3.79010381   | 0.000230012 | 0.004701706 | 0.160043222 |
| SAMD3    | 0.889491678  | 1.553667006 | 3.788047311  | 0.00023173  | 0.004726905 | 0.153129827 |
| CRTAM    | 0.790047372  | 1.59680086  | 3.785709193  | 0.000233699 | 0.004761615 | 0.145273333 |
| PLEKHG5  | 0.759610685  | 0.831376425 | 3.778940451  | 0.000239488 | 0.004867781 | 0.122550918 |
| ACHE     | 1.221058626  | 1.267677293 | 3.778584125  | 0.000239797 | 0.004867781 | 0.121355642 |
| NUAK2    | 1.070612614  | 2.625451277 | 3.775786645  | 0.000242232 | 0.00491024  | 0.111974771 |
| AKAP12   | 0.819183429  | 0.780056852 | 3.774288168  | 0.000243546 | 0.004926613 | 0.106952163 |
| SH2B3    | 0.712729053  | 6.301788747 | 3.768906663  | 0.000248321 | 0.005012785 | 0.088927487 |
| NIBAN3   | 1.379689085  | 2.725523976 | 3.766989813  | 0.000250043 | 0.005042321 | 0.082512192 |
| GPBAR1   | 1.447136039  | 2.655034188 | 3.766647608  | 0.000250352 | 0.005043319 | 0.081367174 |
| SLC26A11 | 0.991101457  | 1.902615127 | 3.764993237  | 0.000251849 | 0.005068234 | 0.075832836 |
| GOS2     | 1.87992251   | 2.389957301 | 3.762949056  | 0.000253711 | 0.005100426 | 0.068997154 |

|           |               |              |               |              |              |               |
|-----------|---------------|--------------|---------------|--------------|--------------|---------------|
| SCML4     | 1. 017771839  | 1. 861848547 | 3. 762605814  | 0. 000254025 | 0. 005101466 | 0. 067849652  |
| EPB42     | 1. 577451404  | 2. 549048647 | 3. 759647287  | 0. 000256746 | 0. 005147631 | 0. 057962391  |
| HS3ST1    | 0. 816830139  | 0. 693359458 | 3. 750221784  | 0. 000265599 | 0. 005306533 | 0. 026504212  |
| CD2       | 1. 259430769  | 4. 226900591 | 3. 748853229  | 0. 000266909 | 0. 005327224 | 0. 021941823  |
| PNOC      | 0. 816627787  | 1. 577597908 | 3. 748007489  | 0. 000267721 | 0. 00533796  | 0. 019123024  |
| ETS1      | 1. 120230094  | 4. 65559004  | 3. 747108526  | 0. 000268587 | 0. 005349743 | 0. 016127391  |
| DDIT4     | 1. 665984286  | 4. 442803153 | 3. 746694967  | 0. 000268986 | 0. 005352217 | 0. 014749474  |
| CORO1C    | 0. 703168333  | 5. 828314827 | 3. 744546085  | 0. 00027107  | 0. 005371705 | 0. 007591676  |
| ARHGAP24  | 1. 001285864  | 1. 541763167 | 3. 743283107  | 0. 000272301 | 0. 005390624 | 0. 003386304  |
| GZMA      | 1. 248206186  | 3. 88794326  | 3. 742060198  | 0. 000273499 | 0. 005408832 | -0. 000684571 |
| TRPV4     | 0. 73933679   | 0. 482502313 | 3. 741459589  | 0. 000274089 | 0. 005414998 | -0. 002683514 |
| ERFE      | 1. 291329103  | 1. 611796673 | 3. 733600795  | 0. 000281922 | 0. 005541615 | -0. 028815441 |
| CCND1     | 1. 206874262  | 1. 447234427 | 3. 730894465  | 0. 000284668 | 0. 00558719  | -0. 037804295 |
| VSIG4     | 2. 033952569  | 3. 359857215 | 3. 729974059  | 0. 000285608 | 0. 005589006 | -0. 040860161 |
| MAFB      | 2. 39273009   | 3. 802632868 | 3. 729816494  | 0. 000285769 | 0. 005589006 | -0. 041383235 |
| TNFRSF13C | 0. 841537827  | 2. 997215641 | 3. 729182923  | 0. 000286418 | 0. 005591449 | -0. 043486348 |
| ANGPTL4   | 0. 608099054  | 2. 059255711 | 3. 728340128  | 0. 000287283 | 0. 005601732 | -0. 046283527 |
| NREP      | -0. 816876002 | 5. 67287383  | -3. 728003274 | 0. 00028763  | 0. 005602876 | -0. 047401381 |
| SMIM30    | -0. 626062603 | 4. 796155803 | -3. 727582369 | 0. 000288063 | 0. 005605711 | -0. 048798046 |
| PLCXD2    | 0. 6091148    | 1. 339921643 | 3. 725758525  | 0. 000289949 | 0. 005636776 | -0. 054848541 |
| OASL      | 1. 084941572  | 1. 806095849 | 3. 724783269  | 0. 000290963 | 0. 005648339 | -0. 058082921 |
| RGS6      | 0. 599804769  | 0. 297173162 | 3. 72426153   | 0. 000291506 | 0. 005650107 | -0. 05981296  |
| TNFRSF17  | 1. 014497444  | 2. 567946785 | 3. 722253679  | 0. 000293606 | 0. 005677397 | -0. 066468995 |
| PKD4      | 1. 707888026  | 2. 195121961 | 3. 721237103  | 0. 000294675 | 0. 005688872 | -0. 069837854 |
| SYNE2     | 1. 058525588  | 2. 098377199 | 3. 719305178  | 0. 000296717 | 0. 005722609 | -0. 076238073 |
| PRDX2     | 1. 445782287  | 5. 652588735 | 3. 71657175   | 0. 000299628 | 0. 005767329 | -0. 085289017 |
| APOA2     | 1. 287820853  | 2. 219255462 | 3. 713494499  | 0. 000302939 | 0. 00582528  | -0. 095472036 |
| SPIB      | 1. 261577988  | 2. 103675986 | 3. 712064303  | 0. 000304489 | 0. 005849309 | -0. 100202433 |
| E2F2      | 0. 900789735  | 3. 898120268 | 3. 709676651  | 0. 000307093 | 0. 005893528 | -0. 108096371 |
| KCNK13    | 0. 597652564  | 0. 419936514 | 3. 705127323  | 0. 000312115 | 0. 005978104 | -0. 123125841 |
| MAL       | 1. 311064365  | 2. 271359421 | 3. 704193425  | 0. 000313155 | 0. 005992133 | -0. 126209299 |
| GZMB      | 1. 404440543  | 2. 868471129 | 3. 697688412  | 0. 000320493 | 0. 006102547 | -0. 147669594 |
| SETBP1    | 1. 511254782  | 1. 906421851 | 3. 69594446   | 0. 000322488 | 0. 006134529 | -0. 153417806 |
| PSAP      | 1. 13599834   | 9. 466183206 | 3. 688099881  | 0. 000331608 | 0. 006295696 | -0. 1792472   |
| HIST3H2A  | 1. 450643874  | 1. 330651854 | 3. 686487739  | 0. 000333512 | 0. 00630777  | -0. 184549932 |
| CD4       | 1. 50790139   | 5. 787242216 | 3. 686463791  | 0. 00033354  | 0. 00630777  | -0. 18462869  |
| VASN      | 0. 616372691  | 2. 30692119  | 3. 68597364   | 0. 000334121 | 0. 006312624 | -0. 186240539 |
| SLC15A3   | 1. 63065556   | 2. 565575558 | 3. 684137038  | 0. 000336307 | 0. 006347755 | -0. 192278621 |
| CARMIL1   | 1. 079204219  | 1. 908409503 | 3. 683035949  | 0. 000337624 | 0. 006360298 | -0. 195897443 |
| CYGB      | 0. 997650458  | 1. 090934801 | 3. 682722475  | 0. 000338    | 0. 006361193 | -0. 19692754  |
| CD3E      | 1. 199988001  | 4. 440541852 | 3. 680344058  | 0. 000340864 | 0. 006396537 | -0. 204740895 |
| NCR1      | 0. 988965575  | 1. 547804541 | 3. 679323097  | 0. 0003421   | 0. 006413556 | -0. 208093611 |
| ZFP36     | 1. 136300739  | 8. 546543736 | 3. 674395975  | 0. 000348127 | 0. 006507742 | -0. 224263165 |
| SLC6A9    | 1. 114562231  | 1. 754403924 | 3. 669132098  | 0. 000354677 | 0. 006611133 | -0. 241518547 |
| SNX25     | 0. 953137497  | 1. 524095317 | 3. 666794493  | 0. 000357623 | 0. 006655648 | -0. 249174988 |
| GPRC5D    | 0. 911338254  | 1. 01254227  | 3. 66669478   | 0. 00035775  | 0. 006655648 | -0. 249501493 |
| ITPR3     | 1. 258758121  | 3. 122575953 | 3. 664099925  | 0. 000361048 | 0. 006704194 | -0. 257995716 |

|          |              |             |              |             |             |              |
|----------|--------------|-------------|--------------|-------------|-------------|--------------|
| KLRC1    | 0.604216507  | 0.662620506 | 3.663229557  | 0.000362161 | 0.006718446 | -0.260843766 |
| SLITRK6  | 0.84711052   | 0.26312341  | 3.657829839  | 0.000369137 | 0.006841344 | -0.278500707 |
| BMPR2    | 1.221894739  | 2.793791249 | 3.655036439  | 0.000372796 | 0.00690258  | -0.287626791 |
| FMNL2    | 0.989244112  | 2.221332519 | 3.65214563   | 0.000376619 | 0.006960111 | -0.297065178 |
| CTSL     | 1.588968118  | 3.106139485 | 3.651820445  | 0.000377051 | 0.006961489 | -0.298126516 |
| CD209    | 0.858297898  | 0.798878388 | 3.649007781  | 0.00038081  | 0.007024222 | -0.307303305 |
| PDE4A    | 1.254783869  | 2.198651345 | 3.647384794  | 0.000382995 | 0.007057836 | -0.312595966 |
| MCOLN2   | 1.04690305   | 1.520148551 | 3.64486872   | 0.000386405 | 0.007113954 | -0.320797278 |
| ICOS     | 0.874840167  | 1.592425246 | 3.644478146  | 0.000386937 | 0.007117015 | -0.322069969 |
| FZD5     | 0.681404788  | 2.284053745 | 3.643461084  | 0.000388326 | 0.007129081 | -0.325383564 |
| ICAM1    | 1.082990957  | 4.030184653 | 3.635477194  | 0.000399392 | 0.007297808 | -0.351369103 |
| TNIK     | 1.199964041  | 2.645393709 | 3.634411505  | 0.000400891 | 0.007311476 | -0.354834158 |
| PCDH12   | 0.727725182  | 1.872310533 | 3.630635779  | 0.000406247 | 0.007381474 | -0.367104183 |
| RASL11A  | 0.858324308  | 1.794539179 | 3.628924422  | 0.000408696 | 0.007412251 | -0.372662197 |
| MAST3    | 0.775106627  | 4.944478148 | 3.628568113  | 0.000409208 | 0.007414511 | -0.373819124 |
| ADD2     | 1.60140572   | 2.280084242 | 3.627331833  | 0.000410988 | 0.007439842 | -0.377832576 |
| GPR65    | 1.184242861  | 2.970233865 | 3.623602233  | 0.000416403 | 0.007530865 | -0.38993361  |
| ASAP1    | 0.814766849  | 5.167334825 | 3.620781855  | 0.000420543 | 0.007591624 | -0.399077881 |
| NUCB2    | -0.874399214 | 6.633682321 | -3.619970214 | 0.000421742 | 0.007606203 | -0.401708324 |
| FPR2     | 1.651915606  | 2.345868024 | 3.616915721  | 0.000426281 | 0.007672905 | -0.411603326 |
| PLS3     | 0.654197245  | 0.418768118 | 3.616686959  | 0.000426623 | 0.007672905 | -0.412344125 |
| ELL2     | 0.987409369  | 3.559657238 | 3.615697288  | 0.000428105 | 0.007685573 | -0.415548534 |
| FN3K     | 1.022041041  | 2.115165551 | 3.615688979  | 0.000428117 | 0.007685573 | -0.415575433 |
| THEMIS   | 1.000960747  | 1.927451001 | 3.615240013  | 0.000428791 | 0.007685903 | -0.417028885 |
| C5AR1    | 2.259406207  | 4.493231657 | 3.61515049   | 0.000428926 | 0.007685903 | -0.417318679 |
| GPR155   | 0.837948719  | 2.495819983 | 3.614870575  | 0.000429346 | 0.007686365 | -0.418224765 |
| ARPIN    | 0.924725492  | 1.133339315 | 3.614352848  | 0.000430126 | 0.007693238 | -0.419900493 |
| UNC5B    | 0.847257787  | 1.342354507 | 3.611738721  | 0.00043408  | 0.007756847 | -0.428358671 |
| ECE1     | 1.181182887  | 3.4831055   | 3.611335995  | 0.000434693 | 0.007760663 | -0.429661276 |
| FOS      | 1.256531104  | 9.732916802 | 3.606874798  | 0.000441531 | 0.007847373 | -0.444082976 |
| SECTM1   | 1.86241807   | 2.843133595 | 3.60415192   | 0.000445754 | 0.007907361 | -0.452878093 |
| PHOSPHO1 | 1.305362827  | 2.673896969 | 3.602970958  | 0.000447598 | 0.007932833 | -0.456691018 |
| LBH      | 0.907063599  | 3.92186704  | 3.600455553  | 0.000451548 | 0.007974884 | -0.464809013 |
| TACR2    | 0.600463765  | 1.520162    | 3.597884233  | 0.000455621 | 0.008038427 | -0.473102698 |
| F5       | 1.388510816  | 2.113048935 | 3.597067596  | 0.000456922 | 0.008054072 | -0.475735717 |
| ITGB5    | 0.968498543  | 1.690546027 | 3.59678391   | 0.000457374 | 0.008054755 | -0.47665027  |
| LY6G6F   | 0.812557037  | 0.637390553 | 3.59487198   | 0.000460436 | 0.00808672  | -0.482812459 |
| LCK      | 1.156790272  | 3.49076574  | 3.58910247   | 0.000469793 | 0.00821399  | -0.501391532 |
| UBXN10   | 0.723185482  | 0.80995906  | 3.588265562  | 0.000471165 | 0.008223498 | -0.504084539 |
| BAHCC1   | -1.508705459 | 5.7857261   | -3.588255295 | 0.000471182 | 0.008223498 | -0.504117571 |
| FCGRT    | 1.378755985  | 5.530985589 | 3.587038858  | 0.000473183 | 0.008243636 | -0.508030906 |
| DAB2     | 0.984651289  | 3.591693431 | 3.585964164  | 0.000474958 | 0.008259764 | -0.511487349 |
| RPH3A    | 0.695374849  | 0.383798903 | 3.58399637   | 0.000478223 | 0.008301718 | -0.517813996 |
| SH2D2A   | 0.912727159  | 2.551340453 | 3.582791456  | 0.000480233 | 0.008321765 | -0.521686516 |
| SLFN12L  | 0.893367528  | 2.794212902 | 3.577827559  | 0.000488599 | 0.008436674 | -0.537628973 |
| NPL      | 1.371034907  | 3.043714223 | 3.577177612  | 0.000489704 | 0.008448265 | -0.539715061 |
| PDZK1IP1 | 1.103848636  | 1.318574812 | 3.575411528  | 0.00049272  | 0.008492762 | -0.545381973 |



|            |              |             |              |             |             |              |
|------------|--------------|-------------|--------------|-------------|-------------|--------------|
| OTUD1      | 0.909116877  | 4.231977993 | 3.566514534  | 0.00050818  | 0.008736032 | -0.573895406 |
| DENND2D    | 0.672092299  | 4.501240202 | 3.566244662  | 0.000508656 | 0.008736498 | -0.574759394 |
| RPGR       | -0.645334867 | 3.702137322 | -3.562526077 | 0.000515259 | 0.008842092 | -0.586658931 |
| BAG3       | 1.208461834  | 1.951949149 | 3.560489901  | 0.000518908 | 0.008896871 | -0.593170429 |
| ST3GAL4    | -1.03226225  | 4.944078384 | -3.558875793 | 0.000521818 | 0.008929513 | -0.598330033 |
| P2RY10     | 1.052809819  | 2.997399211 | 3.55860311   | 0.000522311 | 0.008929513 | -0.599201494 |
| CPM        | 1.442110009  | 2.211191747 | 3.557862692  | 0.000523653 | 0.008929513 | -0.601567501 |
| MPDZ       | 0.629687561  | 0.277272322 | 3.557778061  | 0.000523806 | 0.008929513 | -0.601837913 |
| PLXNA1     | 0.984960895  | 2.048759132 | 3.557658052  | 0.000524024 | 0.008929513 | -0.602221359 |
| UGCG       | 0.975705953  | 4.054802358 | 3.555498954  | 0.000527956 | 0.008972952 | -0.609118138 |
| AGPAT3     | 0.914668564  | 4.471736908 | 3.55319856   | 0.000532177 | 0.009013193 | -0.616462488 |
| TMEM117    | 0.671157142  | 0.890965032 | 3.552103365  | 0.000534197 | 0.009031572 | -0.619957694 |
| GYPA       | 1.774474668  | 2.575499878 | 3.548119658  | 0.000541608 | 0.009141096 | -0.632663868 |
| MARCO      | 1.741738895  | 1.82324443  | 3.546797087  | 0.000544089 | 0.009168572 | -0.636879674 |
| DEF8       | 0.712226823  | 4.13572961  | 3.546749912  | 0.000544178 | 0.009168572 | -0.637030022 |
| GOLGA8R    | -0.819562665 | 2.416945118 | -3.544616408 | 0.000548204 | 0.00922842  | -0.64382796  |
| PRDM8      | -1.035391264 | 4.880075457 | -3.543138878 | 0.000551009 | 0.009267619 | -0.648533817 |
| ITK        | 1.021498793  | 2.556901192 | 3.542533521  | 0.000552162 | 0.00927425  | -0.650461384 |
| KCTD12     | 2.118848705  | 4.685683084 | 3.541952826  | 0.00055327  | 0.009281587 | -0.65231017  |
| ANK1       | 1.737980527  | 3.008525855 | 3.541663045  | 0.000553824 | 0.009282875 | -0.653232665 |
| IGF2R      | 1.427304227  | 3.903582084 | 3.539521899  | 0.000557932 | 0.009343687 | -0.66004693  |
| ST6GALNAC4 | 0.912169777  | 4.164345554 | 3.538367298  | 0.00056016  | 0.009372921 | -0.663720081 |
| GAD1       | 0.786111386  | 0.596627002 | 3.537646078  | 0.000561555 | 0.009383895 | -0.666014013 |
| B4GALNT3   | 0.616298302  | 0.664623168 | 3.537530085  | 0.00056178  | 0.009383895 | -0.666382906 |
| IER3       | 1.437051865  | 2.800883896 | 3.536782362  | 0.000563231 | 0.009393188 | -0.668760666 |
| KLF4       | 1.916738279  | 4.945466196 | 3.536560719  | 0.000563661 | 0.009393188 | -0.669465409 |
| PLPP4      | 0.657510435  | 0.429898546 | 3.536497482  | 0.000563784 | 0.009393188 | -0.669666476 |
| DAB2IP     | 0.647274676  | 0.763255359 | 3.536120544  | 0.000564518 | 0.009397362 | -0.670864903 |
| MYO1C      | 0.963748818  | 2.470039854 | 3.535408847  | 0.000565905 | 0.009412401 | -0.673127367 |
| ABLIM3     | 0.880731044  | 0.670950908 | 3.533183836  | 0.000570262 | 0.009468691 | -0.680198212 |
| KIRREL1    | 1.310633057  | 1.34460618  | 3.532199704  | 0.0005722   | 0.009492759 | -0.683324512 |
| CNN3       | 1.093224379  | 1.071809843 | 3.531214266  | 0.000574146 | 0.00951432  | -0.686454247 |
| SLC30A1    | 0.722430869  | 4.008707634 | 3.530191032  | 0.000576173 | 0.009530903 | -0.689703261 |
| MYCL       | 1.288771813  | 1.484927119 | 3.530047612  | 0.000576458 | 0.009530903 | -0.690158595 |
| PIF1       | 0.86087662   | 2.024954965 | 3.529475769  | 0.000577595 | 0.009541587 | -0.691973938 |
| FYN        | 0.930318446  | 4.568401008 | 3.527989549  | 0.000580558 | 0.00958241  | -0.696690886 |
| TEX14      | 0.902798788  | 0.999877762 | 3.525135003  | 0.000586291 | 0.009668825 | -0.705746038 |
| H2AFY      | -0.636057131 | 7.146861833 | -3.523766333 | 0.000589058 | 0.009706238 | -0.710085583 |
| CDH23      | 0.886467107  | 1.753270731 | 3.523026508  | 0.000590559 | 0.009722738 | -0.712430716 |
| CR1        | 1.614093788  | 2.757106434 | 3.520206511  | 0.000596313 | 0.009800894 | -0.721365975 |
| SLA        | 1.083469186  | 5.03414878  | 3.519059595  | 0.000598669 | 0.009831304 | -0.724998337 |
| VMO1       | 0.686238631  | 0.661809449 | 3.518701925  | 0.000599405 | 0.009835097 | -0.726130904 |
| RHAG       | 1.939533156  | 3.696758024 | 3.516781196  | 0.000603374 | 0.00987524  | -0.732211301 |
| TRIM10     | 1.329871587  | 1.824556382 | 3.513924744  | 0.000609322 | 0.009947493 | -0.741248846 |
| SGCB       | 0.731447123  | 1.269575067 | 3.513355753  | 0.000610514 | 0.009950248 | -0.743048359 |
| SEC14L3    | 0.631190624  | 0.538516862 | 3.511371911  | 0.000614685 | 0.010009848 | -0.749320661 |
| CDC14B     | 0.59721458   | 0.78589893  | 3.509289611  | 0.000619092 | 0.01006477  | -0.755901127 |

|          |              |              |              |              |              |               |
|----------|--------------|--------------|--------------|--------------|--------------|---------------|
| PLSCR4   | 1. 184816879 | 1. 074272953 | 3. 505087477 | 0. 000628076 | 0. 010181948 | -0. 769170896 |
| HBQ1     | 1. 013829729 | 2. 156669687 | 3. 504940568 | 0. 000628393 | 0. 010181948 | -0. 769634577 |
| KMO      | 0. 688417956 | 1. 929862187 | 3. 495563088 | 0. 000648896 | 0. 010453929 | -0. 799199192 |
| HEG1     | 1. 025059101 | 2. 228791378 | 3. 495152124 | 0. 000649809 | 0. 010453929 | -0. 800493359 |
| TBC1D4   | 1. 112828807 | 2. 612872315 | 3. 492205041 | 0. 00065639  | 0. 010537176 | -0. 809770333 |
| CXCL1    | 1. 242287282 | 1. 723405149 | 3. 491704365 | 0. 000657514 | 0. 010539726 | -0. 811345746 |
| GYPB     | 1. 37297884  | 1. 941688228 | 3. 490866496 | 0. 0006594   | 0. 010556001 | -0. 813981744 |
| CEP85L   | 0. 94384566  | 2. 765529398 | 3. 490771262 | 0. 000659614 | 0. 010556001 | -0. 814281325 |
| IER5     | 0. 655345398 | 4. 234253417 | 3. 49027673  | 0. 00066073  | 0. 010565166 | -0. 815836879 |
| HMBS     | 0. 947977107 | 4. 260734582 | 3. 489760343 | 0. 000661897 | 0. 010575134 | -0. 817460984 |
| CDC42BPA | 1. 374780286 | 1. 288579384 | 3. 489092348 | 0. 000663409 | 0. 0105906   | -0. 819561623 |
| KBTBD12  | 0. 741784032 | 0. 454089044 | 3. 485278958 | 0. 000672105 | 0. 010703072 | -0. 83154722  |
| VASH1    | 0. 777776866 | 3. 20983687  | 3. 484368837 | 0. 000674196 | 0. 010718829 | -0. 83440616  |
| TMEM246  | 0. 737019452 | 0. 390567612 | 3. 482324579 | 0. 000678915 | 0. 01077625  | -0. 840825492 |
| ALDH1A1  | 1. 823681046 | 2. 409832865 | 3. 481147963 | 0. 000681645 | 0. 010810769 | -0. 844518865 |
| ZBTB7B   | 1. 035716331 | 5. 450325155 | 3. 480679338 | 0. 000682735 | 0. 010819243 | -0. 845989581 |
| SLAMF1   | 0. 839112103 | 1. 968709657 | 3. 479297577 | 0. 00068596  | 0. 010835046 | -0. 850325107 |
| FCN1     | 2. 313130483 | 5. 620795074 | 3. 475769614 | 0. 000694257 | 0. 010948336 | -0. 861388281 |
| NEO1     | 1. 127154628 | 1. 480913362 | 3. 475319003 | 0. 000695324 | 0. 010956278 | -0. 862800662 |
| SLC10A4  | 0. 716214912 | 0. 780945414 | 3. 475027078 | 0. 000696016 | 0. 010958305 | -0. 863715586 |
| HSPA6    | 1. 098287315 | 1. 778903607 | 3. 470028568 | 0. 000707962 | 0. 011119403 | -0. 879371554 |
| FAM89A   | 1. 202057981 | 2. 909079038 | 3. 466901658 | 0. 000715533 | 0. 011211168 | -0. 889155974 |
| ST6GAL2  | 0. 768488764 | 0. 357480485 | 3. 465177209 | 0. 000719741 | 0. 011268023 | -0. 894548832 |
| ESPN     | 1. 061767066 | 0. 937020658 | 3. 464558033 | 0. 000721257 | 0. 011273626 | -0. 896484636 |
| CACNA1I  | 0. 606005031 | 0. 852321188 | 3. 463016347 | 0. 000725046 | 0. 011323754 | -0. 901303354 |
| CR2      | 0. 767235366 | 0. 946701954 | 3. 461877296 | 0. 000727858 | 0. 011349445 | -0. 904862449 |
| DNAJB9   | 0. 594572451 | 4. 05672557  | 3. 459967466 | 0. 000732594 | 0. 011414161 | -0. 910827761 |
| BACE2    | 0. 969341545 | 1. 160370937 | 3. 458276258 | 0. 000736813 | 0. 011453299 | -0. 916107939 |
| CD14     | 2. 591026728 | 4. 724960659 | 3. 458252722 | 0. 000736872 | 0. 011453299 | -0. 916181405 |
| FGFBP2   | 1. 21275627  | 2. 863592004 | 3. 457566819 | 0. 00073859  | 0. 011470835 | -0. 918322267 |
| KCNJ15   | 0. 65046946  | 0. 467367111 | 3. 45575233  | 0. 000743152 | 0. 011523293 | -0. 92398401  |
| AHSP     | 2. 307007153 | 5. 238932366 | 3. 454786598 | 0. 000745591 | 0. 011551905 | -0. 926996378 |
| SPACA6   | 0. 743823312 | 1. 564571633 | 3. 453986581 | 0. 000747617 | 0. 011574081 | -0. 929491313 |
| GADD45G  | 0. 714670813 | 1. 072707666 | 3. 449741323 | 0. 000758455 | 0. 01170462  | -0. 942722572 |
| RASSF5   | 0. 643786392 | 5. 323003895 | 3. 446798281 | 0. 000766054 | 0. 011810745 | -0. 95188729  |
| VOPP1    | 0. 788105133 | 3. 248072356 | 3. 446609147 | 0. 000766545 | 0. 011810745 | -0. 952476037 |
| DTX1     | 0. 907718029 | 1. 169510854 | 3. 442450618 | 0. 000777412 | 0. 011968708 | -0. 965414187 |
| RUBCNL   | 1. 196223714 | 2. 384711312 | 3. 441270051 | 0. 000780524 | 0. 012003088 | -0. 969084848 |
| ZBTB38   | 0. 92772611  | 2. 782506436 | 3. 44113548  | 0. 000780879 | 0. 012003088 | -0. 969503195 |
| GIMAP7   | 1. 498650335 | 4. 336643265 | 3. 438941535 | 0. 000786695 | 0. 012054395 | -0. 976321693 |
| KLRK1    | 0. 613974507 | 1. 024701002 | 3. 434463079 | 0. 000798693 | 0. 012199812 | -0. 990228974 |
| PID1     | 1. 055450769 | 1. 097646982 | 3. 432785636 | 0. 000803231 | 0. 012259505 | -0. 995434193 |
| FAM214B  | 0. 642592957 | 4. 26618798  | 3. 425745266 | 0. 000822542 | 0. 01252478  | -1. 017257938 |
| TSP02    | 0. 893812284 | 2. 428792666 | 3. 424931863 | 0. 000824801 | 0. 012549358 | -1. 019776929 |
| SLC37A3  | 0. 801426958 | 1. 643015083 | 3. 421771517 | 0. 000833633 | 0. 012663939 | -1. 029559352 |
| TNFAIP6  | 1. 110890057 | 1. 692843978 | 3. 419557433 | 0. 000839874 | 0. 01274841  | -1. 03640828  |
| NUP62CL  | 0. 676403481 | 0. 630870889 | 3. 419334726 | 0. 000840504 | 0. 01274841  | -1. 037096989 |

|          |              |             |              |             |             |              |
|----------|--------------|-------------|--------------|-------------|-------------|--------------|
| ITGB3    | 1.563637444  | 1.984805458 | 3.418664028  | 0.000842405 | 0.012767283 | -1.039170852 |
| IFITM3   | 1.874732049  | 5.681019218 | 3.416890946  | 0.000847448 | 0.012813781 | -1.044651764 |
| PTPRS    | 1.411741412  | 2.221992155 | 3.414972713  | 0.000852936 | 0.012866771 | -1.050578707 |
| DOCK9    | 0.887331716  | 1.427134182 | 3.414382699  | 0.000854631 | 0.01287478  | -1.052401171 |
| ALDH1L2  | 0.666287423  | 1.45914864  | 3.412079198  | 0.000861278 | 0.012922484 | -1.059513836 |
| LY9      | 0.876529669  | 2.740044819 | 3.408893999  | 0.000870548 | 0.013041473 | -1.0693424   |
| LILRA4   | 1.38768677   | 1.542147071 | 3.408654687  | 0.000871249 | 0.013041924 | -1.070080536 |
| FPR1     | 2.106145475  | 3.767089206 | 3.407021237  | 0.000876043 | 0.013093546 | -1.075117617 |
| BTG2     | 0.928279678  | 6.686992103 | 3.405762565  | 0.000879754 | 0.013138921 | -1.078997624 |
| ZC2HC1A  | 0.941993819  | 1.270022491 | 3.404862322  | 0.000882417 | 0.013168591 | -1.081771997 |
| ANKRD28  | -0.841171304 | 6.217980677 | -3.403800084 | 0.00088557  | 0.013195395 | -1.085044823 |
| CDCA7L   | -0.79412285  | 5.333160083 | -3.400722922 | 0.000894761 | 0.013301797 | -1.094520972 |
| SLC2A3   | 1.117003602  | 5.846480206 | 3.400222846  | 0.000896263 | 0.013313958 | -1.096060286 |
| EPSTI1   | 1.302853744  | 2.661008052 | 3.399727     | 0.000897755 | 0.013325946 | -1.097586394 |
| SGSH     | 1.284940865  | 2.999590106 | 3.399234777  | 0.000899238 | 0.013337788 | -1.099101168 |
| PDE2A    | 0.677530074  | 0.882376113 | 3.397699958  | 0.000903878 | 0.013386155 | -1.103823272 |
| CLEC3B   | 0.735070868  | 1.049696754 | 3.397473953  | 0.000904563 | 0.013386155 | -1.104518461 |
| EPN2     | 0.815008515  | 1.318538174 | 3.39627198   | 0.000908215 | 0.013407875 | -1.108215069 |
| CCR2     | 1.971483393  | 3.989666273 | 3.395943547  | 0.000909215 | 0.013407875 | -1.109224957 |
| TRIB2    | 1.123191106  | 2.834896625 | 3.395139534  | 0.000911668 | 0.013430017 | -1.111696852 |
| SERPINI1 | 0.749570445  | 1.826683583 | 3.394363932  | 0.00091404  | 0.013447539 | -1.114080937 |
| OTUD7B   | 0.621308907  | 1.132551937 | 3.393611977  | 0.000916345 | 0.013451305 | -1.1163919   |
| SULF2    | 1.521236163  | 3.940552996 | 3.393539021  | 0.000916569 | 0.013451305 | -1.116616093 |
| TUBB1    | 1.148965128  | 2.718755031 | 3.39257248   | 0.000919541 | 0.013474595 | -1.119585857 |
| Clorf115 | 0.642808336  | 0.77783333  | 3.391638935  | 0.00092242  | 0.01350125  | -1.122453571 |
| CBLN3    | 0.620224228  | 1.333940439 | 3.391532865  | 0.000922747 | 0.01350125  | -1.122779362 |
| SKAP1    | 1.074963741  | 3.108107698 | 3.390829673  | 0.000924922 | 0.013521192 | -1.124938976 |
| CREB3L4  | -0.59749284  | 4.482782426 | -3.388510364 | 0.000932129 | 0.013582977 | -1.132059295 |
| MS4A1    | 1.053608149  | 3.451825021 | 3.38838488   | 0.000932521 | 0.013582977 | -1.132444416 |
| MYO7A    | 1.14410236   | 1.324821171 | 3.387687752  | 0.000934698 | 0.013604511 | -1.134583753 |
| PM20D1   | 0.67132187   | 0.819011369 | 3.384158324  | 0.000945796 | 0.013755745 | -1.145409178 |
| ARHGAP31 | 1.051894277  | 2.588767677 | 3.379932534  | 0.000959245 | 0.013920144 | -1.158358099 |
| CCNA1    | -2.066838286 | 4.5321583   | -3.379140329 | 0.000961786 | 0.01394662  | -1.160784119 |
| CXCL10   | 1.097420765  | 1.240527128 | 3.37669904   | 0.000969657 | 0.014050164 | -1.168257256 |
| CPED1    | 1.02819319   | 1.204859892 | 3.371262338  | 0.000987403 | 0.014254345 | -1.184883583 |
| FBLN2    | 1.212060513  | 1.353629312 | 3.370421619  | 0.000990174 | 0.014273173 | -1.187452644 |
| IL32     | 0.958115164  | 2.878735507 | 3.369502558  | 0.000993212 | 0.014295782 | -1.190260488 |
| TMEM220  | -0.6206788   | 4.264433752 | -3.36839119  | 0.000996897 | 0.014331283 | -1.193655001 |
| LHFPL6   | 1.243181136  | 2.477433964 | 3.363224989  | 0.001014195 | 0.014553441 | -1.209422136 |
| ITLN1    | 0.720116457  | 0.657314997 | 3.363030341  | 0.001014852 | 0.014553441 | -1.210015802 |
| RMDN2    | 0.742392074  | 1.396508695 | 3.362556995  | 0.001016452 | 0.01456565  | -1.211459363 |
| PXDC1    | 0.784929303  | 1.090027699 | 3.360418396  | 0.00102371  | 0.01464808  | -1.21797932  |
| CD5      | 1.043258714  | 3.298699325 | 3.355657604  | 0.001040041 | 0.014849007 | -1.232481118 |
| TAC3     | 0.585919606  | 0.38512327  | 3.35494944   | 0.001042491 | 0.014873075 | -1.234636784 |
| SHTN1    | 1.402642083  | 1.810420318 | 3.350696484  | 0.001057319 | 0.015062536 | -1.247574841 |
| ABCA9    | 0.866140569  | 0.950686221 | 3.348470955  | 0.001065156 | 0.01515417  | -1.254339727 |
| KCNK6    | 0.984152347  | 3.561846924 | 3.348427919  | 0.001065309 | 0.01515417  | -1.254470505 |

|          |              |             |              |             |             |              |
|----------|--------------|-------------|--------------|-------------|-------------|--------------|
| KIF21B   | 0.752152003  | 4.105214372 | 3.346904279  | 0.001070706 | 0.01521983  | -1.259099657 |
| MCUB     | 0.660550955  | 4.191990363 | 3.345648741  | 0.001075174 | 0.015272176 | -1.262912929 |
| PDCD1LG2 | 0.589697645  | 0.905833115 | 3.3436086    | 0.00108247  | 0.015364598 | -1.269106616 |
| APBB1    | 0.84567834   | 1.685131923 | 3.340547821  | 0.001093503 | 0.015499519 | -1.278392932 |
| CARD11   | 1.110865782  | 3.940988013 | 3.340529814  | 0.001093568 | 0.015499519 | -1.278447546 |
| SNX9     | 1.06305821   | 3.289884185 | 3.336430114  | 0.001108512 | 0.015654317 | -1.290874704 |
| TUFT1    | 0.606804115  | 0.949723865 | 3.33375488   | 0.001118367 | 0.015777489 | -1.298977074 |
| SLC6A19  | 0.820659199  | 0.570166379 | 3.332964409  | 0.001121294 | 0.01580042  | -1.301370099 |
| SNN      | 0.733324982  | 4.624059473 | 3.331731704  | 0.001125873 | 0.015847255 | -1.305100965 |
| PFKM     | 0.691382894  | 2.309973472 | 3.331468983  | 0.001126852 | 0.015847255 | -1.305895958 |
| COLEC12  | 0.690654534  | 0.570933345 | 3.331412861  | 0.001127061 | 0.015847255 | -1.306065778 |
| GIMAP4   | 1.560765681  | 4.412642555 | 3.33080925   | 0.001129312 | 0.015860064 | -1.307892079 |
| MSR1     | 1.280692904  | 1.175253943 | 3.328844061  | 0.001136669 | 0.015947791 | -1.313836087 |
| RARG     | 0.78477404   | 2.52109688  | 3.326072733  | 0.001147121 | 0.0160597   | -1.322213385 |
| IER5L    | 0.744121519  | 2.07073051  | 3.325513498  | 0.001149241 | 0.016072771 | -1.323903155 |
| CD247    | 1.01395645   | 2.978758849 | 3.325390834  | 0.001149707 | 0.016072771 | -1.324273762 |
| SH2D1B   | 0.783665112  | 1.413644902 | 3.324373019  | 0.001153576 | 0.016115287 | -1.327348462 |
| EHD4     | 0.926136531  | 3.221929073 | 3.323028284  | 0.001158707 | 0.016175352 | -1.331409535 |
| NRGN     | 1.623642762  | 5.738642237 | 3.320993206  | 0.001166513 | 0.016265409 | -1.337552812 |
| PFKFB2   | 0.987663023  | 2.222810876 | 3.32091074   | 0.00116683  | 0.016265409 | -1.337801685 |
| RAB39A   | 0.976977524  | 1.329752205 | 3.317220545  | 0.001181113 | 0.016405747 | -1.348932961 |
| RAB7B    | -1.507457092 | 4.760865621 | -3.315499582 | 0.001187829 | 0.016487273 | -1.3541206   |
| CD1D     | 1.864395199  | 3.613320376 | 3.314244092  | 0.001192752 | 0.016532014 | -1.357903699 |
| NR4A3    | 0.800943086  | 1.198829808 | 3.311990032  | 0.001201637 | 0.016631479 | -1.364692718 |
| MAP2K1   | 0.611725819  | 5.353249431 | 3.310222678  | 0.001208647 | 0.016692886 | -1.370013109 |
| DDIAS    | 0.596645357  | 2.71297586  | 3.306012147  | 0.001225502 | 0.016878226 | -1.382678749 |
| ASPHD2   | 0.630519116  | 2.319940704 | 3.305710632  | 0.001226718 | 0.016882552 | -1.383585213 |
| APBB2    | 0.603077263  | 0.709199818 | 3.302380311  | 0.001240217 | 0.017020187 | -1.393592739 |
| RUFY4    | 0.870898513  | 0.969611965 | 3.291551991  | 0.001285075 | 0.017583814 | -1.4260729   |
| JAZF1    | 0.971244132  | 3.56795389  | 3.288963147  | 0.001296021 | 0.017673842 | -1.433824984 |
| ANKRD65  | 0.719369142  | 0.55302206  | 3.288629547  | 0.001297438 | 0.017680775 | -1.43482355  |
| AQP1     | 1.174561002  | 2.461005056 | 3.287607658  | 0.001301787 | 0.017711759 | -1.437881838 |
| ZNF366   | 0.815068105  | 1.062885044 | 3.28745408   | 0.001302442 | 0.017711759 | -1.438341393 |
| CEACAM3  | 1.014384643  | 1.080493125 | 3.284919043  | 0.001313296 | 0.017834427 | -1.445924445 |
| ZNF883   | 0.81589071   | 0.768432294 | 3.284493095  | 0.001315128 | 0.01784685  | -1.447198101 |
| MYH10    | 0.898744568  | 3.055247773 | 3.282803026  | 0.00132242  | 0.017920813 | -1.452250311 |
| ABI3     | 1.308783009  | 3.334619586 | 3.281009834  | 0.001330198 | 0.017991041 | -1.457608396 |
| LILRB2   | 1.957391715  | 4.319628714 | 3.28096904   | 0.001330376 | 0.017991041 | -1.457730259 |
| LILRA6   | 1.621523964  | 2.622608198 | 3.280642697  | 0.001331796 | 0.017997741 | -1.458705103 |
| TGFBR2   | 0.649655598  | 5.97042516  | 3.279685815  | 0.001335969 | 0.018041603 | -1.461562999 |
| GNLY     | 1.393358923  | 3.891210421 | 3.278265209  | 0.001342186 | 0.018112998 | -1.465804598 |
| MYB      | -0.65503303  | 7.576041513 | -3.277833608 | 0.001344081 | 0.018125992 | -1.467092951 |
| RAB20    | 0.733407385  | 3.546054125 | 3.276607833  | 0.001349474 | 0.018186126 | -1.470751177 |
| SNX18    | 0.645813817  | 4.369589038 | 3.275938317  | 0.001352429 | 0.018213329 | -1.472748804 |
| SIDT1    | 0.841640907  | 2.609255884 | 3.27538179   | 0.001354889 | 0.018221245 | -1.474409046 |
| BACH2    | 0.92227492   | 2.173591671 | 3.274858794  | 0.001357205 | 0.018239787 | -1.475969044 |
| FCGR2B   | 0.968251191  | 1.712670385 | 3.273343375  | 0.001363937 | 0.018317607 | -1.480488056 |

|          |              |             |              |             |             |              |
|----------|--------------|-------------|--------------|-------------|-------------|--------------|
| MXRA8    | 0.688362635  | 2.568351299 | 3.270654199  | 0.00137596  | 0.018453599 | -1.488502896 |
| CD83     | 0.864666325  | 4.630808514 | 3.270314464  | 0.001377485 | 0.01846134  | -1.489515048 |
| KLHDC8A  | 0.669716202  | 0.508178444 | 3.267972435  | 0.001388047 | 0.018567073 | -1.496490111 |
| SEPTIN1  | 0.79502808   | 3.677594121 | 3.267930554  | 0.001388237 | 0.018567073 | -1.496614801 |
| PELI1    | 1.089926532  | 4.575684199 | 3.266565935  | 0.001394427 | 0.018611483 | -1.500676938 |
| DTX4     | 1.178676818  | 2.660175077 | 3.26351006   | 0.001408381 | 0.018771983 | -1.509768337 |
| GJA1     | 1.41497863   | 1.241748959 | 3.257716978  | 0.001435193 | 0.019064063 | -1.526983351 |
| PLA2G7   | 0.97527814   | 1.0873972   | 3.254474042  | 0.001450409 | 0.019239917 | -1.53660894  |
| PLD2     | 1.078936421  | 2.516458522 | 3.253158118  | 0.001456626 | 0.019296083 | -1.540512516 |
| CTSB     | 0.939282302  | 6.799956979 | 3.250916036  | 0.001467276 | 0.019423945 | -1.547160389 |
| IL7      | 0.970473843  | 1.025038355 | 3.249440677  | 0.001474324 | 0.019477494 | -1.55153278  |
| NLRP12   | 1.643230845  | 3.048773692 | 3.244420527  | 0.001498542 | 0.019757204 | -1.566397977 |
| TRPC1    | 0.71402092   | 0.771063051 | 3.24353453   | 0.001502855 | 0.01978725  | -1.569019491 |
| TFEB     | 1.015243169  | 3.251001517 | 3.242950335  | 0.001505705 | 0.019811368 | -1.57074769  |
| MS4A4A   | 1.698998792  | 3.116552624 | 3.239959993  | 0.001520371 | 0.019932416 | -1.579589776 |
| KAZALD1  | 0.605641161  | 0.555633902 | 3.239529355  | 0.001522494 | 0.019932416 | -1.580862552 |
| PIM2     | 0.655337625  | 6.202352409 | 3.239016504  | 0.001525026 | 0.019932416 | -1.582378129 |
| MARCKS   | 1.425099923  | 3.66690323  | 3.238842494  | 0.001525886 | 0.019932416 | -1.582892315 |
| THEM5    | 0.654567545  | 0.973665242 | 3.238784797  | 0.001526172 | 0.019932416 | -1.583062801 |
| NACC2    | 1.14497466   | 3.554447265 | 3.230785568  | 0.001566204 | 0.020373212 | -1.606674354 |
| NLRC5    | 0.787028097  | 5.347379889 | 3.228204808  | 0.001579326 | 0.020491832 | -1.614281505 |
| LSR      | 0.687839219  | 2.894887798 | 3.228095824  | 0.001579883 | 0.020491832 | -1.614602636 |
| HEPACAM2 | 0.603801777  | 0.563385651 | 3.227549074  | 0.001582677 | 0.020491832 | -1.61621355  |
| TCEAL4   | -0.65827051  | 4.858847369 | -3.227448064 | 0.001583194 | 0.020491832 | -1.616511136 |
| SLFN14   | 0.783741536  | 1.50921734  | 3.227106378  | 0.001584943 | 0.020493679 | -1.617517716 |
| LGALSL   | 0.924765336  | 1.432622276 | 3.225705207  | 0.001592134 | 0.020545709 | -1.621644513 |
| EBF1     | 0.990861013  | 1.318784984 | 3.221824406  | 0.00161221  | 0.020726983 | -1.633066507 |
| KIAA0513 | 1.198332211  | 3.393287331 | 3.221099867  | 0.001615985 | 0.020757137 | -1.635197681 |
| OAT      | 0.863028903  | 5.072695003 | 3.220734785  | 0.00161789  | 0.020767897 | -1.636271389 |
| AVPR1A   | 0.637193915  | 0.464614735 | 3.220418298  | 0.001619543 | 0.020775412 | -1.637202093 |
| TNFRSF1B | 1.564441249  | 6.132103482 | 3.219843283  | 0.00162255  | 0.020800279 | -1.638892862 |
| GAS6     | 0.950606954  | 3.536834526 | 3.218452591  | 0.001629845 | 0.020880041 | -1.642980982 |
| HOOK1    | 0.839764733  | 1.070075763 | 3.217474431  | 0.001634994 | 0.020918466 | -1.645855512 |
| SLC8A1   | 1.107807823  | 1.386920272 | 3.215815699  | 0.001643761 | 0.021013389 | -1.650728353 |
| ITGAE    | -0.631293664 | 3.486924252 | -3.215458753 | 0.001645653 | 0.021013389 | -1.651776671 |
| SLC1A3   | 1.106335185  | 2.854774884 | 3.21472285   | 0.00164956  | 0.021048264 | -1.653937641 |
| CD6      | 1.004186091  | 3.031255374 | 3.214537233  | 0.001650547 | 0.021048264 | -1.654482636 |
| NFKB2    | 0.8358511    | 4.401280987 | 3.213973237  | 0.00165355  | 0.02107274  | -1.656138438 |
| FRMD6    | 0.81032946   | 0.924646404 | 3.212896762  | 0.001659294 | 0.021132106 | -1.659298108 |
| CCR5     | 1.301288461  | 2.615431007 | 3.211097949  | 0.001668934 | 0.021238367 | -1.664575984 |
| HS3ST4   | 0.59584542   | 0.266713276 | 3.210462259  | 0.001672353 | 0.021242819 | -1.666440555 |
| PIK3R3   | 0.67086485   | 1.218347109 | 3.209917057  | 0.001675291 | 0.021266254 | -1.668039461 |
| GBGT1    | 0.655508306  | 4.621746009 | 3.208616197  | 0.00168232  | 0.021299902 | -1.671853542 |
| GIMAP5   | 0.75334605   | 1.573096694 | 3.208256958  | 0.001684266 | 0.021310674 | -1.672906591 |
| FFAR2    | 1.141385746  | 1.744588345 | 3.205273442  | 0.001700508 | 0.021474294 | -1.681648377 |
| MEIS2    | 0.6004984    | 0.297071423 | 3.201900982  | 0.001719043 | 0.021638148 | -1.691521464 |
| TXNDC5   | 0.711004227  | 3.136883338 | 3.200987544  | 0.001724095 | 0.021670127 | -1.69419409  |

|           |              |             |              |             |             |              |
|-----------|--------------|-------------|--------------|-------------|-------------|--------------|
| SH2D3A    | 0.590900746  | 1.500748546 | 3.200706302  | 0.001725654 | 0.021670127 | -1.695016845 |
| KIF21A    | 0.660743181  | 0.891016642 | 3.20063703   | 0.001726038 | 0.021670127 | -1.695219485 |
| SMIM1     | 0.919144879  | 2.062667795 | 3.196320019  | 0.001750129 | 0.021944273 | -1.707840671 |
| MYCT1     | 1.487357733  | 1.279316527 | 3.195839914  | 0.001752828 | 0.021963956 | -1.709243407 |
| CCR4      | 0.796000932  | 1.590933421 | 3.195601498  | 0.001754169 | 0.021966621 | -1.709939929 |
| PF4       | 2.013375691  | 3.410909156 | 3.194447709  | 0.001760674 | 0.022033906 | -1.713310042 |
| KLF1      | 1.404123452  | 3.720762642 | 3.191693731  | 0.001776293 | 0.022215079 | -1.721349977 |
| PPM1N     | 0.735531598  | 1.701845403 | 3.190235625  | 0.001784614 | 0.022290499 | -1.725604369 |
| HIST4H4   | 0.59174868   | 1.629331204 | 3.188801312  | 0.001792835 | 0.022378819 | -1.729787725 |
| FGD2      | 1.537399029  | 3.63376478  | 3.1884932    | 0.001794606 | 0.02238656  | -1.730686163 |
| STK26     | -0.632828081 | 6.802646228 | -3.185194205 | 0.001813666 | 0.022516423 | -1.740301235 |
| BCL11B    | 0.951406942  | 2.456202607 | 3.182982844  | 0.001826547 | 0.022634051 | -1.746741601 |
| TAGLN     | 0.7303341    | 3.701632326 | 3.18286433   | 0.00182724  | 0.022634051 | -1.747086653 |
| ITGAD     | 0.697996243  | 0.784284533 | 3.18237178   | 0.001830122 | 0.022655326 | -1.748520592 |
| SESN2     | 0.714887117  | 3.667362942 | 3.181011602  | 0.001838102 | 0.022739643 | -1.752479436 |
| CD28      | 0.906180401  | 2.137424488 | 3.179855015  | 0.001844913 | 0.022794919 | -1.755844589 |
| CD3G      | 0.946809702  | 2.593186574 | 3.179349382  | 0.001847897 | 0.022817312 | -1.757315425 |
| SPOCK2    | 1.053620434  | 4.148595906 | 3.178155484  | 0.001854963 | 0.022868935 | -1.760787572 |
| NEDD9     | 0.76181378   | 3.128009152 | 3.178047462  | 0.001855604 | 0.022868935 | -1.761101671 |
| TAL1      | 1.541710681  | 3.125007829 | 3.174430791  | 0.001877168 | 0.023090833 | -1.771612746 |
| IVNS1ABP  | 0.726798746  | 5.6964934   | 3.1718421    | 0.001892746 | 0.02325306  | -1.779129953 |
| MX1       | 1.309359613  | 3.124276432 | 3.167603865  | 0.001918511 | 0.023512961 | -1.791425927 |
| GPRIN3    | 1.043209986  | 2.606896478 | 3.165697239  | 0.001930207 | 0.0235793   | -1.796952864 |
| VNN3      | 1.182731091  | 1.52826499  | 3.160662701  | 0.00196141  | 0.023885511 | -1.811533354 |
| FAM110A   | 0.707128173  | 3.992871358 | 3.15992054   | 0.00196605  | 0.023927033 | -1.813681046 |
| LMO4      | 1.029112326  | 4.166863596 | 3.157606266  | 0.001980582 | 0.024058752 | -1.820375413 |
| DUSP1     | 0.995483226  | 9.045362733 | 3.15628535   | 0.001988921 | 0.024129925 | -1.824194473 |
| LLCFC1    | 0.767152301  | 1.095431206 | 3.155491287  | 0.00199395  | 0.024175862 | -1.826489629 |
| PDE4B     | 1.044357843  | 3.808307207 | 3.154329176  | 0.00200133  | 0.024235152 | -1.829847698 |
| MICAL2    | 0.993955768  | 3.008725041 | 3.150472162  | 0.002026009 | 0.024518743 | -1.840985471 |
| PLEKH02   | 0.634384188  | 5.426521826 | 3.149667067  | 0.002031196 | 0.024566236 | -1.843308847 |
| SIGLEC9   | 1.690600035  | 3.413608415 | 3.149159852  | 0.00203447  | 0.024590551 | -1.84477233  |
| C17orf99  | 0.686525439  | 1.031174885 | 3.147584119  | 0.002044673 | 0.024695982 | -1.849317554 |
| STX11     | 1.301668874  | 5.098080974 | 3.147421104  | 0.002045731 | 0.024695982 | -1.849787661 |
| TSPAN9    | 0.711559612  | 0.885985061 | 3.145413356  | 0.002058806 | 0.024776971 | -1.855575965 |
| GSTA4     | 0.775510164  | 1.410972307 | 3.142455501  | 0.002078209 | 0.024964171 | -1.864097662 |
| GJA4      | 0.850433342  | 1.303515301 | 3.136974665  | 0.002114613 | 0.025276641 | -1.879870041 |
| KLRG1     | 0.827095103  | 3.289808363 | 3.136398032  | 0.002118477 | 0.025307286 | -1.881528069 |
| GRK5      | 0.753873715  | 2.131961609 | 3.13541452   | 0.002125083 | 0.025357556 | -1.884355416 |
| SYNE1     | 0.648631442  | 2.596530077 | 3.129225975  | 0.00216709  | 0.025714373 | -1.902128503 |
| CCDC50    | 1.25187565   | 2.734793043 | 3.1287722    | 0.0021702   | 0.025735587 | -1.903430531 |
| PPP1R16B  | 1.032388451  | 3.699873765 | 3.127279602  | 0.00218046  | 0.025841506 | -1.907712143 |
| VDR       | 1.168538964  | 2.954289216 | 3.126536284  | 0.002185586 | 0.025886493 | -1.909843746 |
| EBF3      | 1.020383684  | 1.144859796 | 3.125366449  | 0.002193676 | 0.025934959 | -1.913197584 |
| AGT       | 0.761253221  | 0.696443999 | 3.123365106  | 0.002207581 | 0.026067678 | -1.918932808 |
| QPCT      | 1.364824816  | 2.227826729 | 3.119399279  | 0.002235377 | 0.026331983 | -1.930288335 |
| ARHGEF10L | 1.465166919  | 2.02562405  | 3.117101241  | 0.002251632 | 0.0265013   | -1.93686275  |

|          |              |             |              |             |             |              |
|----------|--------------|-------------|--------------|-------------|-------------|--------------|
| CHI3L1   | 1.463492283  | 1.964997313 | 3.116334219  | 0.002257081 | 0.026539457 | -1.939056183 |
| TRIP10   | 0.778527741  | 2.246675249 | 3.115153678  | 0.002265493 | 0.02660621  | -1.942431247 |
| C5AR2    | 0.926087413  | 1.765420941 | 3.113500178  | 0.002277323 | 0.026696813 | -1.94715661  |
| RNF144B  | 1.114629349  | 3.712354852 | 3.110599987  | 0.002298212 | 0.026909266 | -1.95543957  |
| DUSP10   | -0.696013773 | 5.57023297  | -3.109584128 | 0.00230557  | 0.026962979 | -1.958339301 |
| DEPDC1   | 0.796485222  | 2.763156459 | 3.109176307  | 0.002308531 | 0.026981384 | -1.959503183 |
| CPOX     | 0.585162141  | 4.672420234 | 3.10860009   | 0.002312719 | 0.027014114 | -1.961147428 |
| CAVIN1   | 1.697496739  | 2.7429152   | 3.108097225  | 0.00231638  | 0.02703517  | -1.962582147 |
| BLK      | 0.950319212  | 2.240274317 | 3.107125793  | 0.002323468 | 0.027055418 | -1.965353168 |
| CDKL5    | 0.712616924  | 1.30364299  | 3.106885296  | 0.002325226 | 0.027055418 | -1.966039072 |
| TM7SF3   | -0.753776097 | 7.259520097 | -3.105642128 | 0.002334332 | 0.027136262 | -1.969583902 |
| ZNF318   | 0.644340918  | 4.346796393 | 3.103321827  | 0.002351417 | 0.027302248 | -1.976196864 |
| RBM47    | 1.626028248  | 3.442842442 | 3.100058541  | 0.00237564  | 0.027548688 | -1.985490197 |
| CDC42EP2 | 0.700431794  | 2.778643968 | 3.09781969   | 0.002392393 | 0.027695403 | -1.991861242 |
| TLR5     | 1.372381692  | 2.382632377 | 3.095754129  | 0.002407946 | 0.027842327 | -1.997735656 |
| GPR84    | 0.900553038  | 1.736992922 | 3.094814614  | 0.002415052 | 0.027905756 | -2.000406503 |
| IFI30    | 1.275352248  | 2.217785321 | 3.094649791  | 0.0024163   | 0.027905756 | -2.000874989 |
| GNGT2    | 0.740446002  | 1.510502407 | 3.089349516  | 0.002456768 | 0.028285978 | -2.01592884  |
| SIDT2    | 0.710952762  | 4.685085183 | 3.088712858  | 0.002461671 | 0.02831213  | -2.017735585 |
| KIAA0040 | 0.677808041  | 4.660755946 | 3.087820347  | 0.00246856  | 0.028357836 | -2.020267868 |
| NR1I2    | -0.815749617 | 2.050262322 | -3.0875058   | 0.002470992 | 0.028369027 | -2.021160168 |
| PLAG1    | 1.031342859  | 1.365224045 | 3.086832902  | 0.002476202 | 0.028412081 | -2.023068768 |
| ANKRD55  | 0.647992485  | 1.17148588  | 3.083115954  | 0.002505165 | 0.028696205 | -2.033605031 |
| EVA1C    | 0.772304708  | 1.7075997   | 3.082899304  | 0.002506863 | 0.028696205 | -2.034218821 |
| SMAD7    | 0.720112867  | 1.860028218 | 3.082586286  | 0.002509318 | 0.02870742  | -2.035105566 |
| RIN2     | 1.106767679  | 2.534822554 | 3.080113319  | 0.002528791 | 0.028913198 | -2.04210849  |
| TEC      | -0.728334959 | 5.699855455 | -3.079280613 | 0.002535379 | 0.028954503 | -2.044465451 |
| XKR6     | 0.758712774  | 0.924243137 | 3.077737333  | 0.002547631 | 0.0290756   | -2.04883223  |
| SPTA1    | 1.337578256  | 3.223408277 | 3.073927373  | 0.002578114 | 0.029287862 | -2.05960461  |
| FMNL3    | 0.804409097  | 3.286079646 | 3.069818336  | 0.002611368 | 0.029562491 | -2.071209736 |
| SLC7A7   | 1.501959979  | 3.926749247 | 3.068661502  | 0.002620802 | 0.029634401 | -2.074474564 |
| RASGRP1  | 0.800120627  | 3.265602154 | 3.06623563   | 0.002640686 | 0.02982458  | -2.08131744  |
| MCOLN1   | 0.644421459  | 4.216811789 | 3.063280645  | 0.002665096 | 0.03006537  | -2.089646534 |
| P2RY12   | 0.854545803  | 1.396756718 | 3.055789281  | 0.002727916 | 0.030649681 | -2.110731114 |
| MEFV     | 1.689394496  | 3.011967381 | 3.053267789  | 0.002749367 | 0.03085506  | -2.117817886 |
| AMMECR1  | 0.593204028  | 3.605529054 | 3.048209111  | 0.002792872 | 0.031307192 | -2.13202032  |
| SGPP1    | 1.235875527  | 2.760898048 | 3.047387353  | 0.002799999 | 0.031327014 | -2.134325519 |
| CD48     | 1.163573967  | 5.177797106 | 3.047305028  | 0.002800714 | 0.031327014 | -2.134556428 |
| SIRPB1   | 1.626707644  | 3.958171753 | 3.046569029  | 0.002807113 | 0.031376457 | -2.136620554 |
| FLOT1    | 0.863833892  | 5.537973537 | 3.046157412  | 0.002810697 | 0.031398489 | -2.137774754 |
| CEBPB    | 1.086134313  | 5.441123409 | 3.044573043  | 0.002824534 | 0.031480778 | -2.14221617  |
| LONRF3   | 1.000023705  | 2.665267586 | 3.043131189  | 0.002837181 | 0.031578675 | -2.146256342 |
| S1PR3    | 1.079360765  | 1.708505766 | 3.041132734  | 0.002854797 | 0.031672949 | -2.151853418 |
| RHOU     | 1.127298447  | 3.456651518 | 3.036789633  | 0.002893429 | 0.031974786 | -2.164006198 |
| EPHX3    | 0.610095291  | 1.258684249 | 3.036565507  | 0.002895436 | 0.031977968 | -2.164632935 |
| FAM178B  | 1.050793221  | 1.24756625  | 3.034636697  | 0.002912758 | 0.032132806 | -2.170024937 |
| AXL      | 0.757584525  | 1.182982267 | 3.030880278  | 0.002946768 | 0.03241174  | -2.180517537 |

|           |              |             |              |             |             |              |
|-----------|--------------|-------------|--------------|-------------|-------------|--------------|
| S100A8    | 2.480451133  | 7.835949218 | 3.030503437  | 0.0029502   | 0.032417222 | -2.181569527 |
| CD8B      | 0.803476341  | 2.054062153 | 3.027804945  | 0.002974885 | 0.032633178 | -2.189099331 |
| CRISPLD2  | 1.231961301  | 2.270341399 | 3.02736456   | 0.002978931 | 0.032651893 | -2.190327622 |
| ST14      | 1.373942271  | 2.721226034 | 3.024319952  | 0.003007046 | 0.032856322 | -2.198815189 |
| SLC45A4   | 0.636195953  | 2.772906    | 3.023295392  | 0.003016562 | 0.032941801 | -2.201669731 |
| CXCR4     | 0.907548926  | 8.165035875 | 3.022794025  | 0.003021228 | 0.032974259 | -2.203066292 |
| HELZ2     | 0.924414991  | 3.37990549  | 3.021459275  | 0.003033685 | 0.033049502 | -2.206783272 |
| CDKN2D    | 0.78662516   | 4.977938426 | 3.021146118  | 0.003036614 | 0.033049502 | -2.20765514  |
| CLEC17A   | 0.693739794  | 1.923756282 | 3.020557828  | 0.003042124 | 0.033090964 | -2.209292797 |
| YPEL4     | 0.941752234  | 1.848303647 | 3.018417329  | 0.00306225  | 0.033235579 | -2.215249102 |
| DUSP4     | 0.646360087  | 0.763983904 | 3.017874375  | 0.003067375 | 0.033254055 | -2.216759386 |
| SLC2A6    | 1.068466468  | 3.273328709 | 3.017693999  | 0.003069079 | 0.033254055 | -2.217261067 |
| ARHGEF10  | 0.886229471  | 1.4511076   | 3.016873335  | 0.003076844 | 0.033319637 | -2.219543263 |
| MME       | 0.848350481  | 0.802934355 | 3.014986172  | 0.003094769 | 0.033457889 | -2.224789262 |
| CDK6      | -0.820127172 | 7.442171529 | -3.013975853 | 0.003104404 | 0.033520773 | -2.227596613 |
| CUEDC1    | 0.932852287  | 2.087713464 | 3.01349552   | 0.003108995 | 0.033537165 | -2.228931017 |
| ANKH      | 0.649444821  | 3.63294092  | 3.012942442  | 0.003114289 | 0.033575658 | -2.230467286 |
| ALAS2     | 1.963727027  | 4.670875098 | 3.011708037  | 0.003126134 | 0.033666059 | -2.233895176 |
| C9orf43   | -1.120290009 | 3.183069606 | -3.010773059 | 0.003135134 | 0.033744302 | -2.23649076  |
| TNFRSF11A | 0.803773908  | 1.094071037 | 3.008642747  | 0.003155728 | 0.033890984 | -2.242402092 |
| SIGLEC7   | 1.278508585  | 2.466187909 | 3.007557517  | 0.003166267 | 0.033985414 | -2.245412068 |
| COL6A5    | 0.617997606  | 0.326106479 | 3.001677553  | 0.003223936 | 0.034566279 | -2.261704276 |
| LGR6      | 0.867026187  | 1.24566232  | 2.996395583  | 0.003276564 | 0.035014794 | -2.276315995 |
| KDM5B     | -0.70792611  | 5.705007534 | -2.996072475 | 0.003279809 | 0.035023647 | -2.277209097 |
| ITGAM     | 1.389506515  | 5.560710542 | 2.995498504  | 0.003285581 | 0.035034192 | -2.278795402 |
| SLC4A1    | 1.927707247  | 4.515279185 | 2.99388117   | 0.003301894 | 0.035150362 | -2.283263871 |
| CETP      | 0.998309484  | 2.145837103 | 2.991025006  | 0.003330886 | 0.035381572 | -2.291149943 |
| EFCAB2    | -0.665374971 | 3.650141132 | -2.990821771 | 0.003332958 | 0.035384266 | -2.29171084  |
| KEL       | 1.347988156  | 2.719384862 | 2.990266914  | 0.00333862  | 0.03540575  | -2.293241993 |
| MAML2     | 0.902811835  | 3.097252776 | 2.989144015  | 0.003350107 | 0.035469576 | -2.296339925 |
| CPVL      | 1.546766374  | 4.473917581 | 2.988658749  | 0.003355082 | 0.035500948 | -2.2976784   |
| BEX5      | 0.635742309  | 0.681796702 | 2.985062518  | 0.003392166 | 0.035798019 | -2.307591743 |
| EGR3      | 1.170392361  | 2.223354785 | 2.983252324  | 0.003410975 | 0.035938044 | -2.312577791 |
| SOD2      | 0.713564266  | 4.396461445 | 2.982711239  | 0.003416615 | 0.035977996 | -2.314067658 |
| MYO1D     | 1.015969281  | 1.839841765 | 2.98252386   | 0.003418571 | 0.035979118 | -2.31458355  |
| SLC31A1   | 0.618631925  | 4.050980923 | 2.981636754  | 0.003427842 | 0.036038762 | -2.317025541 |
| LAG3      | 0.950432748  | 1.672892815 | 2.981627252  | 0.003427942 | 0.036038762 | -2.317051694 |
| DMTN      | 1.225685556  | 3.344927597 | 2.980825723  | 0.003436339 | 0.036107537 | -2.319257565 |
| FOLR3     | 1.128759656  | 1.401628761 | 2.979697534  | 0.003448191 | 0.036198721 | -2.322361554 |
| SLC7A8    | 0.801811385  | 1.595295688 | 2.979645579  | 0.003448737 | 0.036198721 | -2.322504474 |
| NADK      | 0.670391848  | 5.62475828  | 2.970569441  | 0.003545474 | 0.03699542  | -2.347438155 |
| IFIT2     | 0.902161401  | 2.80014252  | 2.969218289  | 0.003560087 | 0.037087413 | -2.351144342 |
| MGST1     | -1.204565726 | 5.64099004  | -2.966949985 | 0.003584743 | 0.037304333 | -2.357362966 |
| PPP1R13B  | 0.656097587  | 1.368983976 | 2.965680684  | 0.003598609 | 0.037348763 | -2.36084099  |
| MCEMP1    | 1.320063531  | 3.912467619 | 2.964200896  | 0.003614836 | 0.037497183 | -2.364894135 |
| AANAT     | 0.669334266  | 1.678927891 | 2.962804762  | 0.003630208 | 0.037576516 | -2.368716541 |
| KLHDC8B   | 0.9621955    | 2.952325694 | 2.962606559  | 0.003632395 | 0.037579166 | -2.369259063 |



|          |              |             |              |             |             |              |
|----------|--------------|-------------|--------------|-------------|-------------|--------------|
| PFKFB3   | 0.652635954  | 4.720387861 | 2.959558517  | 0.003666183 | 0.037830772 | -2.377598212 |
| KCTD17   | 0.775933227  | 2.526598002 | 2.959550486  | 0.003666272 | 0.037830772 | -2.377620175 |
| RAB29    | 0.701816733  | 4.251233131 | 2.959535807  | 0.003666436 | 0.037830772 | -2.377660315 |
| CACNA2D3 | 1.059942866  | 1.810206296 | 2.958357973  | 0.00367957  | 0.037926076 | -2.380880734 |
| BEST1    | 0.688073128  | 2.276921244 | 2.956537116  | 0.00369996  | 0.038106687 | -2.385857099 |
| NELL2    | 0.739561123  | 1.48520292  | 2.956443684  | 0.003701009 | 0.038106687 | -2.386112377 |
| CCR1     | 1.532456293  | 4.37543277  | 2.954419117  | 0.003723808 | 0.038298142 | -2.391642194 |
| TRAF1    | 0.6488739    | 3.385148349 | 2.954020512  | 0.003728312 | 0.038298142 | -2.392730537 |
| CDC20    | 0.817229385  | 4.866352987 | 2.953840028  | 0.003730353 | 0.038298142 | -2.393223287 |
| FCGR3A   | 1.568152692  | 4.109797777 | 2.952752923  | 0.003742669 | 0.038393427 | -2.396190692 |
| PRF1     | 1.055129089  | 4.424196056 | 2.951389001  | 0.003758173 | 0.03853216  | -2.399912361 |
| FCMR     | 0.941509689  | 4.768723256 | 2.946515205  | 0.003814058 | 0.038931293 | -2.413199024 |
| MAPK7    | 0.702147869  | 3.361176524 | 2.94636361   | 0.003815809 | 0.038931293 | -2.413611986 |
| CLCN3    | 0.603762194  | 4.001851367 | 2.94625119   | 0.003817107 | 0.038931293 | -2.413918218 |
| DNAJA4   | 0.867227711  | 3.723927255 | 2.944105815  | 0.003841967 | 0.039102863 | -2.419760297 |
| DOK2     | 1.053539874  | 4.973141898 | 2.942171533  | 0.003864508 | 0.039270664 | -2.425024363 |
| ADAP2    | 1.313423735  | 3.31793606  | 2.941009792  | 0.003878104 | 0.039326686 | -2.428184543 |
| S100A12  | 2.391836616  | 5.358097062 | 2.94053374   | 0.003883689 | 0.03934269  | -2.429479193 |
| ZFPM2    | 0.586164317  | 0.334508584 | 2.94047102   | 0.003884425 | 0.03934269  | -2.429649748 |
| LRRK2    | 1.393361176  | 2.52631382  | 2.940006499  | 0.003889882 | 0.039364068 | -2.430912836 |
| LGALS3   | 1.308064779  | 4.435377141 | 2.938552845  | 0.003907005 | 0.039496264 | -2.434864373 |
| CD36     | 1.569326412  | 4.978541522 | 2.936007362  | 0.003937155 | 0.039745273 | -2.441779774 |
| CYP27A1  | 1.408392826  | 1.991508029 | 2.935956111  | 0.003937764 | 0.039745273 | -2.441918956 |
| CXCL8    | 1.485817792  | 4.8988748   | 2.935310735  | 0.003945443 | 0.039760913 | -2.443671413 |
| SESN3    | 1.030240902  | 4.774595973 | 2.9346789    | 0.003952974 | 0.039795594 | -2.445386778 |
| PSAT1    | 0.943760161  | 1.911364149 | 2.934317173  | 0.003957292 | 0.039818462 | -2.446368682 |
| CREB5    | 1.045289136  | 2.288509032 | 2.931242644  | 0.003994166 | 0.040091338 | -2.454710198 |
| RESF1    | 0.652331739  | 5.944809479 | 2.93012991   | 0.004007589 | 0.040199835 | -2.457727279 |
| S100A9   | 2.453067574  | 9.319288163 | 2.924315578  | 0.004078404 | 0.040825995 | -2.47347607  |
| ACCS     | -0.845715483 | 5.216566894 | -2.922979167 | 0.004094842 | 0.040943924 | -2.477092036 |
| SLC37A2  | 1.153117982  | 2.676983118 | 2.921299473  | 0.004115589 | 0.041029383 | -2.481634782 |
| PPM1M    | 0.748571937  | 4.674538714 | 2.920628284  | 0.004123906 | 0.041091248 | -2.483449379 |
| TP53I11  | 1.024410802  | 3.766295208 | 2.919115473  | 0.004142709 | 0.041257479 | -2.487538018 |
| FKBP10   | 0.760346047  | 0.984147583 | 2.918924007  | 0.004145094 | 0.041260119 | -2.488055355 |
| BASP1    | 1.542782248  | 4.435116186 | 2.916849171  | 0.004171024 | 0.041475796 | -2.493659632 |
| STAT4    | 0.900774111  | 3.034701278 | 2.915746559  | 0.004184865 | 0.041577158 | -2.496636448 |
| FKBP15   | 0.599270548  | 4.845502874 | 2.913773055  | 0.004209742 | 0.041761801 | -2.50196203  |
| HLA-DOB  | 0.728196174  | 3.044809889 | 2.91359835   | 0.004211951 | 0.041761801 | -2.502433325 |
| IRF8     | 1.558631099  | 5.103193362 | 2.912689436  | 0.004223459 | 0.041811206 | -2.504884879 |
| PTPRM    | 1.25883449   | 1.77664404  | 2.912639529  | 0.004224092 | 0.041811206 | -2.505019469 |
| OPTN     | 0.951466544  | 3.244693529 | 2.910188635  | 0.004255273 | 0.042055671 | -2.511626668 |
| TICAM1   | 0.587962215  | 4.707214636 | 2.905286309  | 0.004318277 | 0.042591824 | -2.524827924 |
| TMIGD3   | 0.738021496  | 1.44600248  | 2.902049882  | 0.004360339 | 0.042876295 | -2.533532486 |
| BCL6     | 1.233186173  | 4.502893014 | 2.901382268  | 0.004369062 | 0.042940374 | -2.535327017 |
| SPON1    | 1.306060885  | 1.581908325 | 2.897703912  | 0.004417411 | 0.043328035 | -2.545207873 |
| PTPRJ    | 1.119126585  | 4.429822461 | 2.896877812  | 0.004428337 | 0.043407241 | -2.547425445 |
| OSBPL11  | 0.675349725  | 4.487273237 | 2.896587814  | 0.004432178 | 0.043407241 | -2.548203783 |

|          |               |              |               |              |              |               |
|----------|---------------|--------------|---------------|--------------|--------------|---------------|
| TLDC2    | 1. 141412641  | 3. 688747872 | 2. 895286526  | 0. 004449453 | 0. 043532603 | -2. 551695516 |
| C19orf38 | 1. 153025691  | 4. 756748242 | 2. 894947701  | 0. 004453961 | 0. 043554811 | -2. 552604455 |
| HP       | 0. 914557965  | 1. 695769517 | 2. 893531361  | 0. 00447285  | 0. 043646908 | -2. 556402957 |
| GIMAP1   | 0. 856150653  | 3. 270798128 | 2. 892671641  | 0. 004484352 | 0. 043720182 | -2. 558707857 |
| VPREB3   | 0. 860759077  | 2. 037533199 | 2. 891986751  | 0. 004493534 | 0. 04376585  | -2. 560543611 |
| KIAA1549 | -0. 891549889 | 2. 775702783 | -2. 886667967 | 0. 00456543  | 0. 044288766 | -2. 574786922 |
| SHISA4   | 0. 584977091  | 1. 070552444 | 2. 88338203   | 0. 004610372 | 0. 044680201 | -2. 583574939 |
| RAP1GAP  | 0. 736698081  | 1. 130749054 | 2. 882849011  | 0. 004617701 | 0. 044720467 | -2. 584999635 |
| PIK3R5   | 0. 737716174  | 4. 979591384 | 2. 882745614  | 0. 004619123 | 0. 044720467 | -2. 585275976 |
| CTSH     | 0. 936232205  | 4. 45395517  | 2. 880078444  | 0. 004655964 | 0. 04502728  | -2. 592401311 |
| TTC39B   | 0. 694511945  | 1. 80721119  | 2. 879523778  | 0. 004663659 | 0. 045061972 | -2. 593882372 |
| PLCL2    | 0. 717132914  | 4. 307011269 | 2. 879064031  | 0. 004670047 | 0. 045101293 | -2. 595109792 |
| THEMIS2  | 0. 915172777  | 6. 067769506 | 2. 87874055   | 0. 004674545 | 0. 045122348 | -2. 595973311 |
| BLVRA    | 1. 121792479  | 4. 257384028 | 2. 878439228  | 0. 00467874  | 0. 045140443 | -2. 596777601 |
| PPP1R14A | 0. 884043023  | 1. 151369925 | 2. 874320179  | 0. 004736421 | 0. 045634127 | -2. 607764769 |
| RRAS     | 0. 928433347  | 4. 442522319 | 2. 874102092  | 0. 004739493 | 0. 04563609  | -2. 608346112 |
| IL1RN    | 1. 385908703  | 3. 106985169 | 2. 873331748  | 0. 004750359 | 0. 045718096 | -2. 61039926  |
| PPFIBP2  | 0. 746538204  | 1. 726621015 | 2. 873035263  | 0. 004754547 | 0. 045735784 | -2. 611189336 |
| SNAI1    | 1. 035006011  | 2. 649897899 | 2. 871971426  | 0. 004769603 | 0. 045829315 | -2. 614023665 |
| CD22     | 0. 927944354  | 2. 867270207 | 2. 870812599  | 0. 004786052 | 0. 045947992 | -2. 617110022 |
| VAV2     | 0. 863117344  | 3. 616443724 | 2. 869982829  | 0. 004797863 | 0. 046032145 | -2. 619319316 |
| GAS2L3   | 0. 724324874  | 1. 697978699 | 2. 866000732  | 0. 004854914 | 0. 046471529 | -2. 629913994 |
| CFH      | 1. 167908065  | 1. 901724829 | 2. 865649987  | 0. 004859968 | 0. 046497042 | -2. 630846562 |
| MTSS1    | 1. 100695578  | 4. 09110557  | 2. 865331123  | 0. 004864568 | 0. 046518176 | -2. 631694274 |
| TMOD1    | 0. 894506754  | 2. 086981894 | 2. 863530195  | 0. 00489062  | 0. 046698462 | -2. 63648056  |
| LTA4H    | 0. 677768769  | 6. 13045807  | 2. 860228156  | 0. 004938719 | 0. 047088425 | -2. 645249452 |
| RASGEF1B | 0. 898593629  | 2. 921523395 | 2. 859948332  | 0. 004942815 | 0. 047104399 | -2. 645992143 |
| GOLGA80  | -0. 763835778 | 2. 147618627 | -2. 857605206 | 0. 004977234 | 0. 047386238 | -2. 652208621 |
| EHBP1L1  | 0. 665152149  | 6. 17191974  | 2. 855441269  | 0. 005009216 | 0. 047643866 | -2. 657945721 |
| MS4A6A   | 1. 841031925  | 4. 821041588 | 2. 854533262  | 0. 005022692 | 0. 047725384 | -2. 660351922 |
| RHOC     | 0. 828340712  | 3. 530700423 | 2. 853020171  | 0. 005045222 | 0. 047892688 | -2. 664360086 |
| TNFRSF19 | 0. 654793757  | 0. 881878075 | 2. 852514465  | 0. 005052772 | 0. 047940976 | -2. 665699283 |
| FCRL2    | 0. 693121845  | 1. 672319614 | 2. 852348031  | 0. 005055259 | 0. 0479412   | -2. 666139982 |
| OSBP2    | 0. 93280718   | 2. 84660978  | 2. 85190008   | 0. 005061959 | 0. 047981354 | -2. 667325997 |
| ALDH2    | 1. 058520252  | 2. 725193719 | 2. 85145993   | 0. 00506855  | 0. 047982091 | -2. 668491196 |
| FGD6     | 0. 817798898  | 1. 984201415 | 2. 847807513  | 0. 005123546 | 0. 048354976 | -2. 678154073 |
| TC2N     | 1. 010748637  | 2. 809561511 | 2. 847794755  | 0. 005123739 | 0. 048354976 | -2. 678187807 |
| SETD7    | 0. 840389115  | 3. 020349159 | 2. 846122563  | 0. 0051491   | 0. 048523727 | -2. 682608126 |
| TLR7     | 1. 379833879  | 2. 431583542 | 2. 845130681  | 0. 005164198 | 0. 048642447 | -2. 685229015 |
| GIMAP8   | 1. 227658244  | 3. 311034213 | 2. 842835909  | 0. 005199283 | 0. 048901904 | -2. 691289501 |
| PLK1     | 0. 714874704  | 4. 240948878 | 2. 842344072  | 0. 005206831 | 0. 048925602 | -2. 692587882 |
| MMP17    | 1. 17412032   | 2. 787543631 | 2. 841189688  | 0. 005224586 | 0. 049068742 | -2. 695634517 |
| LRRC25   | 1. 553103475  | 4. 601091751 | 2. 838986761  | 0. 005258621 | 0. 04932062  | -2. 701445429 |
| LY96     | 1. 174874366  | 3. 912163435 | 2. 83896183   | 0. 005259008 | 0. 04932062  | -2. 701511169 |
| KCTD7    | 0. 727664978  | 1. 999590188 | 2. 836677852  | 0. 005294512 | 0. 04953423  | -2. 707531646 |
| CXCR3    | 0. 829212766  | 2. 279373201 | 2. 83330883   | 0. 005347283 | 0. 049836266 | -2. 716404469 |
| PC       | 0. 70873857   | 1. 578331633 | 2. 832781162  | 0. 005355591 | 0. 049865937 | -2. 717793319 |

|          |             |             |             |             |             |              |
|----------|-------------|-------------|-------------|-------------|-------------|--------------|
| PRDX4    | 0.770479294 | 4.772674609 | 2.832446992 | 0.005360859 | 0.049891114 | -2.718672756 |
| SRGAP2   | 0.690557661 | 3.871591001 | 2.83184326  | 0.005370388 | 0.049920665 | -2.720261367 |
| COTL1    | 0.924545358 | 6.377000959 | 2.83163     | 0.005373758 | 0.049920665 | -2.72082245  |
| SIGLEC14 | 1.128126249 | 4.806286001 | 2.831596006 | 0.005374296 | 0.049920665 | -2.720911885 |
