# Supplementary material for: CD86 Is Associated with Immune Infiltration and Immunotherapy Signatures in AML and Promotes Its Progression
Source: Hindawi journal article supplement (doi:10.1155/2023/9988405), 2023-04-07
Supplement: f1 [file 9988405.f1.zip]

Supplement Table 5:65 genes screened out by COX  
regression analysis

|          | p.value   | HR        | Low 95%CI | High 95%CI |
|----------|-----------|-----------|-----------|------------|
| TLR7     | 0.0246979 | 1.2202144 | 1.0256783 | 1.4516474  |
| FGD2     | 0.0287049 | 1.2154253 | 1.0205016 | 1.4475808  |
| MS4A4A   | 0.0072583 | 1.2647508 | 1.0654617 | 1.5013158  |
| MS4A6A   | 0.0163999 | 1.206692  | 1.035041  | 1.4068095  |
| IL1RN    | 0.0365759 | 1.2162637 | 1.0122973 | 1.461327   |
| CCR2     | 0.0257716 | 1.1846446 | 1.0207054 | 1.3749148  |
| CUEDC1   | 0.0122557 | 1.4257976 | 1.0802025 | 1.8819609  |
| SLC8A1   | 0.0153197 | 1.3269974 | 1.0557268 | 1.6679714  |
| KIAA0513 | 0.0474948 | 1.2679092 | 1.002626  | 1.6033833  |
| IRF8     | 0.0077443 | 1.2718492 | 1.0655447 | 1.5180972  |
| TFEB     | 0.0081675 | 1.4482038 | 1.100669  | 1.9054724  |
| DOK2     | 0.0314916 | 1.3186144 | 1.0248447 | 1.6965926  |
| GPR65    | 0.0406375 | 1.3715321 | 1.0135549 | 1.8559431  |
| GIMAP1   | 0.0348198 | 1.409455  | 1.0247737 | 1.9385386  |
| CD163    | 0.0320764 | 1.1568871 | 1.0125538 | 1.3217941  |
| MAP2K1   | 0.0364398 | 1.6716057 | 1.0329555 | 2.7051172  |
| MSR1     | 0.000743  | 1.4353411 | 1.1634777 | 1.7707293  |
| ABI3     | 0.021171  | 1.2950438 | 1.0394523 | 1.6134829  |
| KMO      | 0.0025142 | 1.8876276 | 1.2500984 | 2.850286   |
| SLC31A1  | 0.0431743 | 1.6211051 | 1.0149371 | 2.589305   |
| SH2B3    | 0.0339599 | 1.7028355 | 1.0411328 | 2.7850901  |
| OTUD1    | 0.0238068 | 1.5893163 | 1.063483  | 2.3751451  |
| PIK3R5   | 0.0263907 | 1.5474195 | 1.052545  | 2.274969   |
| CACNA2D3 | 0.0146745 | 1.3464744 | 1.0603062 | 1.7098772  |
| MYO7A    | 0.0012004 | 1.4604031 | 1.1612925 | 1.8365546  |
| EHBP1L1  | 0.0306813 | 1.5677751 | 1.0427542 | 2.3571411  |
| GNGT2    | 0.0015095 | 1.7770003 | 1.2457985 | 2.5347037  |
| PDK4     | 0.0330099 | 1.2314662 | 1.0169392 | 1.4912485  |
| ST14     | 0.0041284 | 1.3276604 | 1.0938955 | 1.6113806  |
| FTH1     | 0.0186236 | 1.5193223 | 1.0723606 | 2.1525785  |
| SLA      | 0.0282612 | 1.4501518 | 1.0403862 | 2.0213073  |
| IL10     | 0.0004251 | 1.5717409 | 1.222243  | 2.0211769  |
| CLCN5    | 0.0007159 | 1.7341122 | 1.2606166 | 2.3854556  |
| CPVL     | 0.0150637 | 1.2383713 | 1.0422843 | 1.4713485  |
| MRVI1    | 0.0274625 | 1.492353  | 1.0454746 | 2.1302454  |
| IQSEC1   | 0.0399479 | 1.3897903 | 1.015228  | 1.9025453  |
| PMM1     | 0.0368434 | 1.5155276 | 1.0257255 | 2.239219   |
| FOLR2    | 0.0095997 | 1.3851835 | 1.082479  | 1.7725363  |
| HFE      | 0.0103601 | 1.7629011 | 1.1428149 | 2.7194431  |
| NEDD9    | 0.0209072 | 1.6601327 | 1.0797684 | 2.5524368  |
| CORO1C   | 0.0107024 | 2.0373213 | 1.1795691 | 3.5188089  |
| MCOLN1   | 0.0222703 | 1.6790901 | 1.0766576 | 2.6186076  |
| VOPP1    | 0.0459019 | 1.4629806 | 1.0069483 | 2.1255434  |
| KIAA0040 | 0.0123301 | 1.789046  | 1.134415  | 2.8214415  |
| BCL2L11  | 0.0004392 | 1.9228876 | 1.3354773 | 2.7686707  |

|          |           |           |           |           |
|----------|-----------|-----------|-----------|-----------|
| CIQA     | 0.0456294 | 1.1566592 | 1.0028321 | 1.3340823 |
| TRPV4    | 0.0002829 | 2.1623848 | 1.4259882 | 3.2790651 |
| KCTD17   | 0.0283424 | 1.5312672 | 1.0462308 | 2.2411683 |
| MYO1E    | 0.0122486 | 1.4528215 | 1.0846483 | 1.9459676 |
| CRTAM    | 0.0088907 | 1.8356962 | 1.1645896 | 2.8935348 |
| AGPAT3   | 0.0290139 | 1.5572067 | 1.0463463 | 2.3174857 |
| IFIT2    | 0.0465474 | 1.3384079 | 1.0044664 | 1.7833704 |
| HK1      | 0.0212256 | 1.6727088 | 1.0798341 | 2.591097  |
| RASL11A  | 0.0018088 | 1.8238049 | 1.250348  | 2.6602708 |
| ZBTB38   | 0.0101472 | 1.6511203 | 1.126532  | 2.4199919 |
| RNF144B  | 0.0055102 | 1.5031895 | 1.1272407 | 2.004522  |
| SASH1    | 0.0005663 | 1.6500188 | 1.24118   | 2.1935272 |
| THBS1    | 0.0070464 | 1.230121  | 1.0580928 | 1.4301181 |
| MX1      | 0.047178  | 1.229801  | 1.0025813 | 1.5085167 |
| BAG3     | 0.0019712 | 1.563377  | 1.1780161 | 2.0748    |
| PTK2     | 0.0031733 | 1.4380602 | 1.1297077 | 1.8305773 |
| ZNF532   | 0.0009404 | 1.4789014 | 1.172856  | 1.8648064 |
| KDM5B    | 0.0418495 | 0.7261481 | 0.5335507 | 0.9882679 |
| MYB      | 0.0186839 | 0.6441775 | 0.4465102 | 0.9293507 |
| KIAA1549 | 0.0140297 | 0.7046644 | 0.5329573 | 0.9316919 |
