# Supplementary material for: CD86 Is Associated with Immune Infiltration and Immunotherapy Signatures in AML and Promotes Its Progression
Source: Hindawi journal article supplement (doi:10.1155/2023/9988405), 2023-04-07
Supplement: f1 [file 9988405.f1.zip]

Supplementary table 1: chemokines,  
immunostimulators, MHC proteins,  
and receptors in TISIDB website

| Genes  | Type      | Alisa  |
|--------|-----------|--------|
| CCL1   | chemokine | CCL1   |
| CCL2   | chemokine | CCL2   |
| CCL3   | chemokine | CCL3   |
| CCL4   | chemokine | CCL4   |
| CCL5   | chemokine | CCL5   |
| CCL7   | chemokine | CCL7   |
| CCL8   | chemokine | CCL8   |
| CCL11  | chemokine | CCL11  |
| CCL13  | chemokine | CCL13  |
| CCL14  | chemokine | CCL14  |
| CCL15  | chemokine | CCL15  |
| CCL16  | chemokine | CCL16  |
| CCL17  | chemokine | CCL17  |
| CCL18  | chemokine | CCL18  |
| CCL19  | chemokine | CCL19  |
| CCL20  | chemokine | CCL20  |
| CCL21  | chemokine | CCL21  |
| CCL22  | chemokine | CCL22  |
| CCL23  | chemokine | CCL23  |
| CCL24  | chemokine | CCL24  |
| CCL25  | chemokine | CCL25  |
| CCL26  | chemokine | CCL26  |
| CCL27  | chemokine | CCL27  |
| CCL28  | chemokine | CCL28  |
| CX3CL1 | chemokine | CX3CL1 |
| CXCL1  | chemokine | CXCL1  |
| CXCL2  | chemokine | CXCL2  |
| CXCL3  | chemokine | CXCL3  |
| CXCL5  | chemokine | CXCL5  |
| CXCL6  | chemokine | CXCL6  |
| CXCL8  | chemokine | CXCL8  |
| CXCL9  | chemokine | CXCL9  |
| CXCL10 | chemokine | CXCL10 |
| CXCL11 | chemokine | CXCL11 |
| CXCL12 | chemokine | CXCL12 |
| CXCL13 | chemokine | CXCL13 |
| CXCL14 | chemokine | CXCL14 |
| CXCL16 | chemokine | CXCL16 |
| CXCL17 | chemokine | CXCL17 |

|          |            |          |
|----------|------------|----------|
| XCL1     | chemokine  | XCL1     |
| XCL2     | chemokine  | XCL2     |
| CCR1     | receptor   | CCR1     |
| CCR2     | receptor   | CCR2     |
| CCR3     | receptor   | CCR3     |
| CCR4     | receptor   | CCR4     |
| CCR5     | receptor   | CCR5     |
| CCR6     | receptor   | CCR6     |
| CCR7     | receptor   | CCR7     |
| CCR8     | receptor   | CCR8     |
| CCR9     | receptor   | CCR9     |
| CCR10    | receptor   | CCR10    |
| CXCR1    | receptor   | CXCR1    |
| CXCR2    | receptor   | CXCR2    |
| CXCR3    | receptor   | CXCR3    |
| CXCR4    | receptor   | CXCR4    |
| CXCR5    | receptor   | CXCR5    |
| CXCR6    | receptor   | CXCR6    |
| XCR1     | receptor   | XCR1     |
| CX3CR1   | receptor   | CX3CR1   |
| B2M      | MHC        | B2M      |
| HLA-A    | MHC        | HLA-A    |
| HLA-B    | MHC        | HLA-B    |
| HLA-C    | MHC        | HLA-C    |
| HLA-DMA  | MHC        | HLA-DMA  |
| HLA-DMB  | MHC        | HLA-DMB  |
| HLA-DOA  | MHC        | HLA-DOA  |
| HLA-DOB  | MHC        | HLA-DOB  |
| HLA-DPA1 | MHC        | HLA-DPA1 |
| HLA-DPB1 | MHC        | HLA-DPB1 |
| HLA-DQA1 | MHC        | HLA-DQA1 |
| HLA-DQA2 | MHC        | HLA-DQA2 |
| HLA-DQB1 | MHC        | HLA-DQB1 |
| HLA-DRA  | MHC        | HLA-DRA  |
| HLA-DRB1 | MHC        | HLA-DRB1 |
| HLA-E    | MHC        | HLA-E    |
| HLA-F    | MHC        | HLA-F    |
| HLA-G    | MHC        | HLA-G    |
| TAP1     | MHC        | TAP1     |
| TAP2     | MHC        | TAP2     |
| TAPBP    | MHC        | TAPBP    |
| BTNL2    | Immunostin | BTNL2    |
| VISTA    | Immunostin | VSIR     |
| CD27     | Immunostin | CD27     |
| B7-H3    | Immunostin | CD276    |
| CD28     | Immunostin | CD28     |
| CD40     | Immunostin | CD40     |
| CD40LG   | Immunostin | CD40LG   |
| CD48     | Immunostin | CD48     |
| CD70     | Immunostin | CD70     |
| B7. 1    | Immunostin | CD80     |

|         |                      |
|---------|----------------------|
| B7.2    | Immunostin CD86      |
| CD39    | Immunostin ENTPD1    |
| B7-H7   | Immunostin HHLA2     |
| ICOS    | Immunostin ICOS      |
| B7-H2   | Immunostin ICOSLG    |
| CD25    | Immunostin IL2RA     |
| IL6     | Immunostin IL6       |
| IL6R    | Immunostin IL6R      |
| NKG2A   | Immunostin KLRC1     |
| NKG2D   | Immunostin KLRK1     |
| LTA     | Immunostin LTA       |
| MICB    | Immunostin MICB      |
| CD73    | Immunostin NT5E      |
| CD155   | Immunostin PVR       |
| RAET1E  | Immunostin RAET1E    |
| STING   | Immunostin TMEM173   |
| TMIGD2  | Immunostin TMIGD2    |
| CD267   | Immunostin TNFRSF13B |
| BAFF-R  | Immunostin TNFRSF13C |
| HVEM    | Immunostin TNFRSF14  |
| BCMA    | Immunostin TNFRSF17  |
| GITR    | Immunostin TNFRSF18  |
| DR3     | Immunostin TNFRSF25  |
| OX40    | Immunostin TNFRSF4   |
| CD30    | Immunostin TNFRSF8   |
| 4-1BB   | Immunostin TNFRSF9   |
| APRIL   | Immunostin TNFSF13   |
| BAFF    | Immunostin TNFSF13B  |
| LIGHT   | Immunostin TNFSF14   |
| TL1A    | Immunostin TNFSF15   |
| GITRL   | Immunostin TNFSF18   |
| OX-40L  | Immunostin TNFSF4    |
| 4-1BB-L | Immunostin TNFSF9    |
| ULBP1   | Immunostin ULBP1     |
